# Supplementary material for: Transcriptome analysis provides a blueprint of coral egg and sperm functions
Source: PeerJ journal article supplement (doi:10.7717/peerj.9739), 2020-08-18
Supplement: 200216_Mcap_SupplementalSpreadsheet_1.xlsx [file 200216_Mcap_SupplementalSpreadsheet_1.xlsx]

## Sheet: Contents
Tab 1	Contents:
Tab 2	Graphs and values for normalization of RNA-seq read counts by TPM
Tab 3	All Mcap genes with blast, KEGG, and GO annotations
Tab 4	Egg genes with cross-referenced KOs and GOs
Tab 5	Egg KOs for Fig 2 (GO terms highlighed in yellow are the data used in the figure)
Tab 6	Sperm genes with cross-referenced KOs and GOs
Tab 7	Sperm KOs for Fig 2 (GO terms highlighed in yellow are the data used in the figure)
Tab 8	Count matrix and column data (DESeq2 input) for Egg transcriptome
Tab. 9	Count matrix and column data (DESeq2 input) for Sperm transcriptome
Tab 10	DESeq raw output for Egg transcriptome
Tab 11	DESeq raw output for Sperm transcriptome
Tab 12	Count matrix and column data (DESeq2 input) for Egg vs. Sperm differential expression analysis
Tab 13	DESeq raw output for Sperm transcriptome, including filtered outputs and annotations for DEGs

## Sheet: TPM Normalization
Name	Total counts-EGG	Greater than X TPM:	How many?	% of all genes	Percentage of >0			Name	Total counts-SPERM	Greater than X TPM:	How many?	% of all genes	Percentage of >0			Name	Total counts-ATAC	Greater than X TPM:	How many?	% of all genes	Percentage of >0
g71356	254508	0	20220	31.98	100			g3320	175529	0	19140	30.2719	100			adi2mcaRNA12104_R0	194730	0	37105	58.6854	100
g28909	224150	10	14244	22.5284	70.4451			g71356	172702	10	14441	22.8399	75.4493			g18784	37526.6	10	17323	27.3981	46.6864
g3320	141200	20	12283	19.4268	60.7468			g43299	147164	20	12404	19.6182	64.8067			g16667	32790.6	20	13698	21.6648	36.9169
g43299	129712	30	11103	17.5605	54.911			g28909	128661	30	11281	17.8421	58.9394			adi2mcaRNA41381_R0	24696.8	30	11462	18.1283	30.8907
g53997	112043	40	10298	16.2873	50.9298			g53997	102594	40	10448	16.5246	54.5873			g64793	24445.1	40	9826	15.5408	26.4816
g53471	80812.8	50	9649	15.2609	47.7201			adi2mcaRNA41381_R0	85123.1	50	9793	15.4886	51.1651			g19954	19641.6	50	8608	13.6144	23.199
g28104	68360.8	60	9107	14.4037	45.0396			g44802	81990.3	60	9261	14.6472	48.3856			g22343	13365.8	60	7572	11.9759	20.407
g53133	68245.6	70	8678	13.7251	42.9179			g57431	81278.5	70	8852	14.0003	46.2487			g22452	12728.9	70	6748	10.6727	18.1862
adi2mcaRNA4923_R0	65448.2	80	8289	13.1099	40.9941			g22343	68806.7	80	8446	13.3582	44.1275			g29788	12219.2	80	6013	9.51018	16.2054
g43322	63722.7	90	7960	12.5896	39.367			adi2mcaRNA4923_R0	66331.1	90	8106	12.8205	42.3511			g37352	11981.1	90	5429	8.58652	14.6315
g45282	62078.8	100	7620	12.0518	37.6855			g61996	62313	100	7783	12.3096	40.6635			g52015	11235.6	100	4884	7.72455	13.1626
g44802	60371.1	110	7345	11.6169	36.3254			adi2mcaRNA14527_R0	55377.1	110	7519	11.8921	39.2842			g1927	11216	110	4417	6.98594	11.9041
adi2mcaRNA14527_R0	59798.2	120	7113	11.2499	35.178			g44605	53809.4	120	7249	11.465	37.8736			g57431	10787.6	120	4004	6.33274	10.791
adi2mcaRNA41381_R0	55726.4	130	6903	10.9178	34.1395			g53133	53760.8	130	7076	11.1914	36.9697			g39843	10775.2	130	3655	5.78076	9.85042
g34640	54629.4	140	6695	10.5888	33.1108			g28104	53064	140	6855	10.8419	35.815			g70997	10491.4	140	3364	5.32051	9.06616
g22343	51770.9	150	6518	10.3089	32.2354			g62792	51672.1	150	6658	10.5303	34.7858			adi2mcaRNA8685_R0	10423.3	150	3122	4.93776	8.41396
g42214	51337.2	160	6331	10.0131	31.3106			g34640	49858.1	160	6467	10.2282	33.7879			g1496	10304	160	2902	4.58981	7.82105
g67459	44827.4	170	6161	9.74425	30.4698			g22281	49485.9	170	6312	9.98308	32.9781			g7549	10194	170	2703	4.27507	7.28473
g3805	42587.8	180	6012	9.5086	29.7329			g42214	46721.8	180	6159	9.74109	32.1787			adi2mcaRNA4240_R0	10168.5	180	2509	3.96824	6.76189
g32971	42565	190	5870	9.28401	29.0307			g67459	46393.2	190	6018	9.51809	31.442			g12344	9979.73	190	2341	3.70253	6.30912
g44605	41091.1	200	5728	9.05942	28.3284			g50848	44388.7	200	5889	9.31406	30.768			g23512	9305.47	200	2209	3.49376	5.95338
g50848	40311.5							g53471	43034.4							adi2mcaRNA10314_R0	9204.8
g60712	39024.2							g45282	42862.9							g33571	9178.06
g61996	36358.3							adi2mcaRNA35549_R0	42081.3							g40955	8963.3
adi2mcaRNA35549_R0	36183.7							g67498	41546.7							g28121	8806.78
g36975	35634.6							g45540	41083.1							g49073	8802.36
g19663	35472.3							g19954	39444.2							g70018	8689.38
g57431	35221.7							g43322	38783.7							g25680	8680.43
g4765	34615							g47409	38669.4							g37219	8653.1
g62792	34393.6							g56733	38311.9							g61989	8651.52
g67498	32952.9							g62606	36779.6							g58310	8498.36
g19954	32909.8							g60712	35877.4							g3316	8442
g22428	32091.1							g31910	35785.2							g46901	8382.81
g45285	31478.5							g32971	35359.3							g48100	8300.63
g70483	31388.2							g3805	34995.6							g29391	8168.39
g47409	30671.5							g26310	33293.8							g32871	8149.83
g56733	29132.1							g4765	31593.3							g67296	7955.54
g45540	28649.7							adi2mcaRNA12557_R0	30572.5							g56986	7724.72
g34004	27899.7							adi2mcaRNA12104_R0	29433.9							g23859	7512.41
g71132	27803.7							g34004	29331							g59079	7484.13
g26310	26511.7							g70483	27690.1							g48273	7409.58
g62125	25918.2							g42005	27674.6							g44605	7014.03
g33339	25746.4							g22452	26338.2							g42339	6985.5
g71334	25679.2							g36975	26184.9							g8629	6938.79
g48417	25223.2							g22428	25905.7							g35915	6936.11
g42622	25049.6							g42622	25632.8							g32286	6933.4
g65329	24788.1							g35046	25546.9							g53763	6716.63
g23131	24533.7							g64793	24629.3							g40434	6665.64
adi2mcaRNA8071_R0	24497.1							g59715	24461.1							adi2mcaRNA9576_R0	6622.89
g68207	24152.4							g57630	24327.1							g41056	6591.6
g25192	22379.2							g66183	23577.4							g60207	6567.34
adi2mcaRNA12557_R0	21195.3							g71132	23552.6							adi2mcaRNA11555_R0	6548.27
g62129	20528.7							g32300	23335.5							g62913	6535.26
g32300	20350.1							g15826	23176.4							g62404	6514.58
adi2mcaRNA12432_R0	20165.7							adi2mcaRNA20384_R0	22790.7							g60582	6368.68
g23510	20128.2							g1540	22724.6							g32462	6293.21
adi2mcaRNA20384_R0	19610.1							adi2mcaRNA3630_R0	22573.1							g16577	6273.23
adi2mcaRNA3630_R0	19522.7							g62129	22348							adi2mcaRNA4923_R0	6210.57
g66825	19365.6							adi2mcaRNA40027_R0	22282.9							g28104	6159.83
g50687	19224.3							g23131	22181.7							g16209	6140.59
g64793	19192.2							g18629	22145.4							g25411	6113.83
g35321	18933.9							g25192	21643.4							g67869	5944.39
g2955	18704.7							g35017	21334.8							g28210	5744.23
g18629	18590.1							g40415	21013.4							g54194	5723.44
adi2mcaRNA12104_R0	18579.9							g2955	20941.5							g32794	5645.86
g15438	18558.7							adi2mcaRNA18450_R0	20777.4							g38790	5634.7
g22452	18544.6							g45176	20579.5							g31779	5585.4
g35257	18512							g54181	20383.6							g46347	5572.04
g43321	18402.1							g50687	20117.9							g22391	5424.92
g31955	18392.9							g71334	19828.9							g43301	5378.59
g70335	18236.2							g45278	19770.9							adi2mcaRNA12669_R0	5200.73
g59715	18220.4							g55033	19605.5							g48216	5199.36
g35144	18165.6							adi2mcaRNA8809_R0	19583.8							adi2mcaRNA32176_R0	5002.54
g63375	18090.7							g35986	19560							g17505	4955.96
g44175	17654.9							adi2mcaRNA8071_R0	19251.5							g21440	4945.45
g63106	17602.5							g43321	19245							g22455	4880.19
g35106	17593.4							g32305	18639.4							g55033	4852.97
g13222	17578							g35993	18484.1							g59951	4706.59
g25636	17534.3							g33339	18453.7							g30581	4692.5
g37835	17137.1							g7442	18313.9							adi2mcaRNA8815_R0	4583.52
g66183	17132.3							g48417	18238.7							g66568	4568.56
g56095	16663.7							g45285	18110.6							g25976	4558.4
g3313	16425.5							g68207	17780.9							g41436	4534.07
g15826	16203.1							g63106	17772.4							g28909	4509.41
g32305	16007.1							g35106	17662.9							g48618	4483.75
g28259	15979.9							g44608	17621.9							g41407	4456.95
g49518	15872.7							g3076	17449.1							adi2mcaRNA12507_R0	4440.76
g28271	15809.1							g50760	17382.2							g31412	4380.88
g58602	15802.4							g54698	17171.6							g33737	4358.19
g7442	15544.9							g51183	16960.1							g46302	4306.97
g45278	15496.1							g31955	16636.7							g47187	4287.88
g55033	15406.9							g52615	16620.6							g3076	4173.59
g57630	15295							g49518	16526.4							g25164	4123.3
g55143	15244.1							g30581	16519.8							g23885	4082.95
g62126	15238.9							g3313	16465.4							g58302	4081.88
g31726	15001.9							g38004	16391.7							g33835	4077.64
g35017	14997.1							g21662	16279.7							g64750	4032.95
g2599	14826.9							g44175	16121							g5391	3926.81
g204	14765.5							g48809	16035							g2996	3924.95
g21662	14752							g18919	15848							g32127	3917.57
g35993	14654.6							g33595	15651.7							g12942	3713.26
g65331	14639.7							g57629	15374.8							g43720	3710.09
g22808	14633							g35960	15162.4							adi2mcaRNA20508_R0	3577.55
g54698	14591.2							g60582	15148.7							g46631	3419.07
g60582	14523.1							g65966	14983.9							g42577	3405.58
g33595	14462.2							g54595	14981.6							g37994	3333.6
g16448	14360.1							g35144	14908.1							g15366	3262.44
g30168	14332.8							g56095	14758.5							g508	3242.17
g16174	14112.6							g246	14687.7							g9068	3227.18
adi2mcaRNA40027_R0	14053.5							g16448	14546.4							g60874	3203.78
g29391	13961.5							g58166	14465.9							g40436	3186.33
g246	13881.1							g47027	14450.6							adi2mcaRNA13842_R0	3185.6
g18919	13832.7							g15438	14285.9							g43034	3118.64
g47027	13771.6							g67350	14035.2							g34510	3111.73
g21754	13711.3							g2599	13710.2							g45559	3100.22
g39935	13546.5							g33570	13615.2							adi2mcaRNA3258_R0	3016.87
g40415	13514.5							g204	13606.9							g9357	3013.29
g21658	13360.5							g49538	13459.5							g24362	3006.46
g54181	13349.2							g51719	13404.9							g27646	2987.77
g55713	13100.6							adi2mcaRNA5468_R0	13391.4							g36741	2919.73
g44571	13033.3							g25268	13295							g27090	2896.05
g22501	13021.4							g35150	13150.1							g45343	2869.52
g35150	12968							g21649	13137.6							g48634	2860.23
g39402	12922							g11025	13107.4							g18745	2846.63
g45176	12905.8							g29391	13082.1							g58859	2835.67
g58166	12809.4							g35257	13061.5							g47153	2821.19
g36666	12750							g62125	13056.6							g44608	2804.03
g10290	12696.6							g58602	12887.2							g58644	2764.81
g40433	12663.5							g10290	12848.5							g42439	2711.29
g55599	12645.3							g68066	12791.7							g27092	2660.36
g49538	12618.5							g31726	12776.4							adi2mcaRNA10685_R0	2657.84
g35960	12609.4							g48650	12762.6							g66329	2623.91
g10474	12483.2							g28271	12622.4							g68018	2590
g25164	12415.7							g22808	12537.6							g59066	2586.17
g21903	12411.5							g70335	12492.4							g36885	2518.65
g25268	12339.6							g23510	12459.3							g48221	2512.44
g68066	12212							g70711	12436.2							g25394	2499.56
g27724	12143.1							adi2mcaRNA8685_R0	12435.1							g16638	2475.58
adi2mcaRNA5468_R0	12123.6							adi2mcaRNA12432_R0	12386.3							g25233	2473.03
g42006	12080.7							g63375	12272.9							g42414	2462.15
g68766	12055							g55143	12219.3							g48223	2454.54
g5071	12036.5							g9975	12178.7							g30020	2451.87
g48066	11997.1							g68201	12113.8							g48010	2403.87
g35046	11993.4							g65329	12011.1							adi2mcaRNA29184_R0	2381.19
g48809	11939							g35181	11895.7							g61692	2377.28
g64750	11931.5							g8788	11869.1							g48088	2347.83
g27633	11730.5							g42006	11782.2							g25393	2328.1
g51719	11658							g61017	11764.6							g60074	2318.77
g52055	11628.1							g40433	11747.9							g25117	2299.44
g7099	11533.2							g22616	11736.8							g23472	2291.06
g39629	11450.3							g32379	11733.3							g66112	2263.82
g35986	11358.6							g62126	11716							g66694	2259.75
g25161	11354.1							g65053	11693							g28508	2247.85
adi2mcaRNA8809_R0	11111.1							g52541	11623.9							g57630	2245.57
g58547	11063.1							g44571	11586							g33898	2227.43
g65053	10828.4							g50913	11460.9							g18787	2218.79
g48650	10799.8							g47410	11454.4							g50407	2214.87
g56768	10777.2							g69462	11290.7							g45857	2211.72
g46746	10720.5							g49071	11017.2							g33433	2175.19
g70332	10711							g48277	10978.5							g35175	2143.01
g28497	10597.3							g48078	10962							g42212	2135.89
adi2mcaRNA8685_R0	10567.2							g30168	10942.7							g31692	2103.81
g44608	10545.2							g30303	10852.2							g33208	2101.37
g67239	10543.6							g33999	10827.2							g67506	2078.58
g33976	10514							g60239	10813.7							g34004	2074.94
adi2mcaRNA24510_R0	10462.5							g39402	10730.6							g36059	2064.85
g25233	10441.6							g16174	10698.4							g44170	2057.78
g11969	10434.4							g28554	10681.3							g50586	2054.72
g69583	10425.2							g39935	10678.1							g32151	2046.92
g53479	10358.4							g70332	10524.9							g30720	2040.9
g34497	10354.8							g35523	10503.2							g46625	2032.86
g48277	10352.7							g55713	10497.4							g56341	2024.84
g54401	10316.7							g55722	10479.1							g27724	1997.15
g38004	10247.8							g30538	10439.9							g22260	1994.87
g16868	10242.1							g7930	10427.8							g51635	1993.13
adi2mcaRNA2034_R0	10220							g52083	10400.9							g55713	1950.73
g23915	10180.9							g63509	10395.2							adi2mcaRNA14527_R0	1927.54
g62606	10157.3							g36666	10378							g33920	1902.43
g22281	10136.6							g38017	10307.9							adi2mcaRNA20376_R1	1891.86
g62715	10128.1							g67296	10288.8							g39294	1856.51
g42005	10077.2							g34000	10285.4							g42005	1856.47
adi2mcaRNA3284_R1	10051.2							adi2mcaRNA3566_R1	10284.6							g41346	1850.25
g61017	10040.9							g32480	10273							g66820	1831.53
g42221	9974.87							g46746	10253.5							g37950	1793.59
g46687	9965.79							g2266	10248.5							g68202	1777.58
g53518	9922.86							g10474	10206.8							g21649	1745.11
g36306	9857.55							g48648	10090.9							adi2mcaRNA21193_R0	1731.29
g41346	9847.86							g28259	10089.6							g25958	1717.96
g38017	9806.18							g21658	10054.3							g36306	1713.01
g17681	9792							g13947	10009.3							g33963	1710.48
g63355	9757.42							g25636	9968.31							g28271	1710.23
g54595	9740.2							adi2mcaRNA5460_R0	9934.43							g44419	1706.69
g58644	9717.09							g35321	9931.55							g2817	1685.29
g68166	9664.27							g23512	9923.68							g22574	1678.72
g51183	9651.55							g63602	9861.56							g48648	1674.92
g37211	9635.56							g41436	9841.34							g3640	1663.15
adi2mcaRNA18450_R0	9609.98							g53479	9796.34							g35869	1660.78
g67350	9595.64							adi2mcaRNA8162_R0	9780.53							g520	1657.19
g39879	9391.36							g62715	9772.87							adi2mcaRNA21163_R1	1653.17
g25180	9296.24							g60306	9701.78							g62117	1641.43
g63509	9197.98							g4521	9695.85							g54942	1623.79
g68201	9178.18							g28508	9676.18							g58768	1602.5
g9141	9172.85							g35961	9639.65							g43595	1601.39
g63602	9171.7							g15548	9602.83							g12572	1584.47
adi2mcaRNA132_R0	9133.12							g54361	9558.14							g11665	1581.02
g28554	9087.3							g58547	9552.57							g32015	1547.46
g66868	8973.54							g23915	9512.64							g57306	1545.05
g39631	8970.68							g37211	9502.66							g34933	1538.4
g34000	8926.34							g68766	9495.24							g24378	1537.12
g35254	8925.22							g36306	9464.32							g42003	1522.46
g2266	8918.97							g4670	9440.18							g70353	1512.24
adi2mcaRNA20392_R0	8891.67							adi2mcaRNA2034_R0	9391.59							g68190	1502.08
adi2mcaRNA5460_R0	8873.15							g17681	9355.47							g22253	1479.86
adi2mcaRNA7685_R0	8861.08							g23034	9353.07							g39402	1478.13
adi2mcaRNA8162_R0	8840.06							g58644	9350.55							g30489	1468.98
g37833	8824.3							g68202	9337.07							g45278	1466.07
g28508	8821.81							g51150	9288.81							g23023	1462.86
g60066	8812.25							g2306	9256.63							adi2mcaRNA15602_R0	1459.14
g21649	8725.82							g56768	9246.92							g41908	1458.72
adi2mcaRNA3566_R1	8721.7							g39629	9244.8							g49263	1453.96
g8788	8667.59							g27724	9219.53							g7104	1446.99
g48648	8661.5							g68166	9215.71							g22281	1442.18
g33570	8659.48							g22994	9202.21							g42221	1441.92
g31995	8636.71							g52055	9199.63							g1548	1441.23
adi2mcaRNA27141_R0	8610.14							g37835	9122.07							g46731	1428.03
g48268	8578.72							g30720	9073							g22495	1420.72
g4181	8538.23							g56262	9059.61							g3805	1403.22
g35181	8516.91							adi2mcaRNA3284_R1	9008.6							g42820	1402.88
g21643	8494.78							g39631	9002.78							g1536	1374.62
g22253	8485.96							g63355	9001.64							g33544	1373.99
g48078	8485.54							g24237	8995.71							adi2mcaRNA9513_R0	1362.27
g13947	8448.38							adi2mcaRNA32436_R0	8929							g26387	1358.58
g52541	8403.53							g64750	8866.85							g31717	1342.39
g62144	8383							g25233	8855.27							g201	1339.98
adi2mcaRNA15462_R0	8335.12							g48634	8795.06							g37235	1333.57
g48010	8296.59							g28854	8793.52							g60649	1324.2
g23034	8289.12							g21903	8718.87							g27888	1323.85
adi2mcaRNA31368_R2	8280.35							g41646	8712.89							g64285	1321.39
g54008	8276.8							g23797	8712.36							g35961	1315.48
g65966	8205.09							g53518	8554.42							g6678	1306.8
g6372	8179.9							g48066	8524.24							g6367	1305.96
g39630	8141.87							g37692	8432.97							adi2mcaRNA8809_R0	1302.41
g56247	8109.78							g27633	8394.82							g9067	1302.14
g65054	8099.62							g53132	8383.74							g24884	1300.38
g36885	8068.7							g35271	8364.43							g35106	1292.49
g24144	8067.04							g32127	8339.88							g70483	1278.16
g50902	8031.2							g67358	8297.54							g50758	1275.88
g67777	7995.61							g31906	8285.4							g15548	1274.77
g57326	7964.51							g13222	8268.47							g33244	1271.52
g55722	7832.15							g26398	8266.57							g45823	1264.48
g36357	7818.99							g6327	8221.15							g52607	1261.88
g11025	7816.07							g52607	8196.01							g54181	1252.22
g67744	7815.5							g16868	8194.58							g36737	1251.84
g30303	7804.02							g53638	8161.49							g55197	1251.11
g34972	7793.65							g56247	8139.81							g65832	1245.98
g46700	7752.21							g66825	8089.31							g22334	1242.35
g1540	7730.18							g52524	8084.45							g47732	1232.32
g48376	7640.98							g34497	8073.42							g47587	1231.3
g48416	7630.25							g46302	8058.16							g34805	1224.74
g48634	7605.92							g52048	8025.16							g48131	1217.22
g40346	7604.87							g27542	8004.95							g37349	1212.05
adi2mcaRNA32436_R0	7589.76							g55599	7991.83							adi2mcaRNA23946_R1	1210.8
g64064	7584.28							g57326	7985.51							g46627	1208.63
g35271	7557.35							g22270	7972.15							g46059	1208.09
g38356	7522.71							g32972	7940.69							g24144	1206.04
g27773	7516.05							g68839	7935.21							g40301	1198.92
g9975	7512.38							g7743	7913.4							g44829	1197.23
g23797	7497.86							g37074	7906.42							g47736	1193.8
g1880	7487.67							adi2mcaRNA27141_R0	7899.81							g52631	1192.27
g40747	7441.39							g34416	7812.78							g62792	1192.1
adi2mcaRNA8957_R0	7430.18							g28497	7811.83							g36960	1187.01
g55973	7428.49							g31995	7799.76							adi2mcaRNA32887_R1	1184.17
g37060	7416.15							g55973	7786.77							g45529	1182.73
g53132	7404.57							g43166	7749.15							g1837	1178.28
g56262	7357.47							g68918	7732.45							g43712	1173.52
g42289	7292.74							g42621	7732.25							g35176	1165.42
g69137	7274.77							g33976	7731.48							g38073	1163.63
g42621	7248.56							g21681	7716.21							g49870	1156.44
adi2mcaRNA10296_R0	7247.66							adi2mcaRNA15625_R0	7704.93							g28004	1155.46
g45174	7226.88							g56200	7691.55							g21371	1152.67
g32480	7211.75							g48579	7687.12							g25703	1150.18
g69462	7169.97							g34604	7681.63							g35257	1145.6
g476	7162.28							g41830	7676.48							g33870	1144.28
g9989	7134.23							g40346	7664.31							g43265	1143.46
g22994	7126.05							g32286	7649.6							g21635	1136.01
g30538	7117.35							g31916	7628.68							g41080	1135.16
g43167	7041.38							g69137	7587.05							g17324	1132.07
g33999	7040.44							g62404	7560.37							g52803	1129.82
g67837	7031.73							g45174	7544.51							g50848	1117.35
g36006	6906.59							g46687	7542.58							g23890	1116.74
g33184	6897.77							g57176	7528.35							g22807	1112.7
g57629	6875.77							g41346	7498.65							g10109	1102.7
g56200	6864.03							g24884	7478.84							g35254	1102.15
g36960	6836.45							g22253	7466.18							g33619	1097.99
g52524	6808.46							g34641	7462.28							g22424	1091.78
g43166	6793.07							g6766	7435							g60886	1091.02
adi2mcaRNA36621_R2	6789.13							g34002	7422.76							g39438	1087.95
g30581	6759.3							g46004	7414.55							g57432	1085.12
adi2mcaRNA22237_R0	6744.74							g1880	7363.89							g69137	1081.09
g28088	6734.43							g26590	7321.7							g45222	1077.01
g54361	6731.54							adi2mcaRNA8957_R0	7313.29							g27156	1074.99
g63466	6706.62							g48010	7305.02							g54998	1072.89
g15548	6701.64							g54401	7288.44							adi2mcaRNA6430_R0	1071.75
g48579	6696.57							adi2mcaRNA7685_R0	7264.84							g62118	1063.18
g33463	6693.78							g6861	7257							g36720	1062.15
g24364	6683.55							g56217	7240.03							g35150	1054.92
g39213	6682.67							g48376	7237.8							g17502	1054.8
g46970	6666.9							g69583	7213.41							adi2mcaRNA6696_R0	1051.65
g32379	6617.24							g33184	7205.67							g25161	1051.08
g31906	6572.4							g47153	7175.35							adi2mcaRNA40027_R0	1046.06
g66919	6553.95							g65331	7111.26							adi2mcaRNA19752_R0	1043.9
g42288	6543.55							g33244	7100.4							g62636	1042.54
g51150	6543.37							g41483	7087.64							g52541	1042.28
g67358	6530.35							g59987	7044.52							g71154	1039.49
g23838	6522.22							g33429	7044.47							g23884	1032.82
g70557	6505.76							g46373	7025.75							g67244	1027.71
g31191	6502.22							g24364	6919.4							g33616	1026.19
g32230	6500.62							g33995	6855.8							g3408	1023.54
g67296	6495.24							g42221	6855.08							adi2mcaRNA20376_R0	1022.77
g41436	6479.83							g6372	6846.83							g28521	1022.77
g37095	6454.62							g49867	6793.86							g25484	1011.74
g4670	6450.72							g4181	6771.76							g28632	1009.91
adi2mcaRNA35119_R0	6446.63							g59713	6764.23							g25395	1009.28
g27208	6426.42							g42289	6750.14							g54193	1009.06
g44169	6396.74							g34632	6743.87							g32298	1007.9
g40452	6376.45							g27229	6722.39							g37211	1005.7
g37074	6363.12							adi2mcaRNA35119_R0	6708.47							g601	1003.78
g70711	6349.49							g34628	6701.7							g37422	1002.6
g62779	6349.2							g4643	6697.65							g29445	1001.94
adi2mcaRNA5413_R0	6310.7							g45529	6693.13							g26398	997.367
g58088	6306.07							g27208	6678.09							g34937	993.802
g4521	6263.82							g43823	6670.36							g28747	993.259
g53863	6250.97							g22501	6633.2							g41435	991.999
g50626	6243.51							g47990	6612.11							g36708	991.393
g2306	6223.58							g17324	6592.43							g67498	990.57
adi2mcaRNA4454_R0	6205.09							g11238	6588.31							g50460	987.493
g27150	6164.63							g58646	6582.16							g31886	986.18
g53638	6147.56							g60066	6562.26							g63072	985.42
g34594	6141.08							g39879	6547.11							g39001	982.134
g60246	6139.59							g10610	6496.39							g46331	976.719
g35523	6120.23							g21754	6489.73							g31995	975.044
g42437	6117.52							g48268	6463.42							g27166	972.631
g55982	6111.8							g50902	6453.7							g31481	972.247
g26875	6058.89							g43167	6427.37							g43263	972.138
g28936	6053.65							g57634	6411.04							g38104	970.584
g474	6050.25							g50688	6405.31							g25172	965.332
g41491	5990.66							g22334	6398.92							g60712	963.549
g35517	5990.13							g69802	6394.8							g3096	962.972
g35151	5968.38							g38594	6370.05							g23910	962.003
g62404	5958.23							g35239	6359.33							g50930	961.622
adi2mcaRNA23574_R0	5954.25							g37095	6343.82							g59987	961.012
g28241	5938.47							g35151	6336.21							g67846	960.466
g62789	5937.67							adi2mcaRNA36018_R0	6327.01							g64486	959.938
g38208	5928.31							g69680	6323.76							adi2mcaRNA10443_R0	957.438
g26872	5915.87							g29890	6252.04							g67309	955.936
g69497	5912.6							g21440	6251.06							g64800	954.707
g57176	5892.96							g49854	6250.04							g47497	947.051
g48573	5889.68							g66958	6243.13							g47735	943.718
g7930	5853.02							g49604	6235.55							g532	938.306
g33670	5848.13							g26495	6226.48							g7157	936.025
g26398	5841.82							g33964	6213.33							g32971	932.455
g54966	5813.36							g27543	6209.55							g67449	928.238
g60917	5788.37							g30190	6187.75							g6368	927.907
g50760	5784.65							g42739	6183.1							g27816	923.726
g34633	5771.99							g45454	6168.6							adi2mcaRNA18205_R0	921.816
g46004	5758.3							g48088	6166.21							g69680	921.138
g39439	5748.17							adi2mcaRNA5195_R2	6157.95							g46069	920.415
g53095	5723.7							g28088	6153.11							g35550	920.097
adi2mcaRNA11601_R0	5709.4							g62779	6149.69							g55089	914.818
g60239	5707.35							g51846	6137.89							g39929	911.231
g6751	5697.62							adi2mcaRNA13842_R0	6131.06							g53126	907.554
g67821	5691.49							g54239	6115.85							g40913	904.61
g52083	5691.3							g53863	6115.78							g4242	902.144
g70218	5689.21							g60679	6091.22							g55428	899.927
g15769	5677.22							g28070	6051.37							g28270	890.057
g69680	5669.19							adi2mcaRNA32600_R0	6030.01							g35557	888.88
g46726	5661.25							g67242	6021							g42331	888.242
g32029	5659.76							g36960	6019.22							g54871	885.306
g55162	5655.28							g11631	6014.5							g33796	884.026
g33244	5653.41							g30020	6001.59							g32029	882.93
g39845	5621.49							g56364	5976.6							g64086	881.212
g21681	5598.11							adi2mcaRNA15775_R0	5973.95							g11422	880.367
g46373	5596.11							g27888	5972.6							g28158	875.897
g22616	5585.47							g39213	5955.72							g28991	873.527
g64608	5575.88							g40754	5955.39							g18999	872.843
g41483	5571.66							g1837	5952.91							g46329	872.705
g47223	5565.37							g70218	5924.48							g23900	871.005
g28070	5558.38							g2854	5914.8							g28243	870.761
g56109	5537.99							g16778	5911.58							g32184	869.362
g49071	5530.11							g64608	5887.64							g63510	865.636
g47990	5528.17							g28905	5874.93							g32497	864.521
g61318	5516.51							g40452	5831.84							adi2mcaRNA5641_R1	862.128
adi2mcaRNA354_R0	5511.84							g48573	5814.76							g3026	857.799
g35359	5504.5							g41412	5809.99							g23310	854.761
g1833	5503.44							g11969	5805.58							adi2mcaRNA10970_R0	852.385
adi2mcaRNA10013_R0	5484.67							adi2mcaRNA15462_R0	5793.89							g26534	841.313
g5324	5467.75							g33463	5791.82							g60892	840.274
g5231	5460.23							g67244	5789.55							g3806	836.205
g23825	5459.7							g22319	5764.04							g49848	832.424
g52048	5458.79							g40747	5761.6							g55947	828.239
g5149	5452.6							g56109	5758.55							g65965	827.441
g25117	5434.61							g32029	5744.96							g33952	826.956
g45454	5430.94							adi2mcaRNA20392_R0	5734.93							g67354	825.992
g43823	5410.79							g5149	5731.61							g41353	825.069
adi2mcaRNA32600_R0	5394.85							g51668	5731.54							g44798	821.793
g18493	5388.93							g58571	5719.19							g46067	818.894
g36436	5379.18							g51658	5714.17							g62129	817.21
g35239	5374.26							g28241	5712.91							g49867	816.957
adi2mcaRNA20459_R0	5358.11							g36436	5711.14							g22757	812.966
g47153	5349.36							g44188	5710.14							g21743	812.534
g55428	5347.57							g55982	5700.84							g37684	809.802
g49867	5326.83							g54247	5697.52							g34598	803.634
g64078	5322.28							g64078	5695.57							g39685	803.246
g61997	5289.45							g39630	5691.56							g29795	800.565
g17201	5282.17							g70557	5682.24							g52590	799.836
g32972	5264.96							g693	5680.2							g47761	798.072
adi2mcaRNA13109_R0	5255.58							g25180	5653							g42289	797.81
g33619	5244.21							g22568	5651.95							g42600	796.824
g41487	5213.58							g23471	5650.28							g23883	796.36
g48810	5199.6							g46700	5633.52							g48078	795.64
g51733	5195.15							g22380	5630.3							g26476	791.627
g57634	5188.68							g63838	5627.37							adi2mcaRNA10748_R0	790.767
g7933	5111.02							g66257	5600.45							g39446	790.176
g5229	5104.76							g64064	5579.81							g41679	788.983
g41830	5090.34							g36885	5574.19							g56391	788.942
g27543	5087.19							g15769	5562.91							g67243	788.651
g32127	5082.16							g27168	5561.2							g11963	788.61
g27542	5079.52							g67744	5556.98							g35523	786.904
g61117	5061.48							g61318	5547.79							adi2mcaRNA15301_R1	784.764
g68164	5035.24							g48618	5531.86							g32493	781.365
g68202	5022.55							g11964	5522.39							g58328	780.956
g30020	5012.18							g62006	5517.36							g27781	780.517
g60929	5007.95							g54490	5510.35							adi2mcaRNA1343_R0	780.264
g51658	4999.13							g41222	5502.03							g46208	773.895
g22541	4992.67							adi2mcaRNA31485_R0	5495.28							g5147	772.002
g9676	4985.95							g67239	5492.2							g44421	770.474
g40127	4980.48							g37060	5469.32							g31826	766.715
g8376	4974.66							g34972	5467.58							g10108	763.588
g41831	4967.99							g45559	5465.51							g32486	762.976
g60679	4958.42							g476	5443.46							g48809	762.078
g48088	4946.74							g55653	5412.57							g28738	760.778
g47418	4945.2							g67821	5394.63							g47223	760.541
g475	4935.45							g37833	5371.89							g36545	757.976
g71045	4920.91							g25117	5364.5							g45449	757.509
g24100	4917.28							g30466	5357.28							g3865	756.294
g59713	4911.14							g35254	5355.4							g29268	753.549
g26476	4906.71							g46625	5309.45							g67098	750.283
g39001	4888.99							g63055	5289.7							g25015	749.805
g28997	4888.44							adi2mcaRNA21193_R0	5281.9							g29496	747.721
g24884	4860.35							g21661	5276.71							g29129	744.354
g46302	4854.65							g54008	5271.96							g24236	744.304
g11238	4843.98							g29393	5264.61							g28766	743.452
g59987	4840.32							g31191	5258.33							g32748	741.2
g29890	4839.87							g61008	5243.49							g27815	738.173
g67353	4836.44							adi2mcaRNA7157_R0	5235.81							g57304	737.943
g27168	4833.57							g58088	5235.52							g35517	735.765
g27888	4832.58							adi2mcaRNA18213_R0	5231.52							g53997	727.37
g30039	4827.84							g36261	5229.77							g4245	725.24
g28243	4826.32							g55428	5229.29							g18529	724.032
g50929	4824.59							g28270	5224.1							adi2mcaRNA27696_R2	722.024
g69042	4815.27							g67837	5207.25							g3897	721.646
g67242	4789.36							g33940	5203.22							g44606	720.664
g31916	4770.75							g35187	5201.96							g24982	718.898
g16778	4764.33							adi2mcaRNA1343_R0	5200.07							g1833	717.067
g63039	4744.05							g6370	5190.83							g60932	716.097
g41458	4738.82							g49978	5186.16							g15776	714.023
g7743	4720.78							g2205	5184.76							g48118	712.769
g45772	4717.13							g8982	5180.73							g34960	709.387
g25539	4712.7							g30039	5179.72							g6815	709.199
g52828	4706.36							adi2mcaRNA5211_R0	5170.99							g28554	708.735
g34163	4703.96							adi2mcaRNA4454_R0	5168.2							g67849	706.304
g42739	4700.95							g54400	5167.72							g52627	706.109
g32331	4686.45							g25161	5157.26							g24085	703.335
g67732	4676.45							g1833	5153.72							g10610	703.011
g43420	4676.03							g60401	5134.85							g46147	699.078
g52615	4674.41							g14701	5098.84							g35960	697.398
g49848	4653.5							g21643	5096.59							g23893	695.913
g27229	4590.37							g46002	5087.63							g57629	694.976
g30148	4579.22							g32471	5083.98							g62606	694.116
g43398	4576.81							adi2mcaRNA30199_R0	5078.08							g47737	693.907
g25116	4575.48							g17201	5058.19							g55430	692.814
g4643	4567.96							g51733	5039.33							g62126	690.444
g49604	4567.76							g28903	5032.56							g35104	690.196
g27090	4565.71							g4187	5029.67							g33339	689.022
g30720	4555.55							g47223	5004.29							g34604	686.777
g40933	4551.15							g49848	4984.75							g35017	686.657
g50761	4543.69							g62144	4983.35							g63355	685.693
g22334	4522.93							g45328	4971.96							g49156	685.513
g49603	4521.89							g24111	4961.93							g44547	684.215
g13409	4508.91							g17782	4956.36							g4819	683.618
g6861	4504.89							g22834	4951.23							g19907	682.693
g35182	4498.37							g45772	4928.39							g58166	682.189
g54400	4496.89							g35869	4923.37							adi2mcaRNA27166_R0	680.712
g35187	4478.16							g65054	4913.96							g36662	680.425
g69045	4473.31							g22495	4902.68							adi2mcaRNA18450_R0	680.315
g27725	4470.85							g41407	4896.06							g51186	679.918
g51846	4467.26							g67354	4884.04							g35889	679.395
g23173	4466.23							g50626	4883.75							g33394	678.468
g57805	4436.74							g9989	4883.74							g62437	677.773
g11964	4425.58							g35035	4881.25							g25018	676.151
g32471	4422.28							g24365	4878.85							g31222	671.736
g49854	4402.91							g9141	4865.17							g21681	671.381
g45529	4395.76							g54966	4863.88							g29625	667.769
adi2mcaRNA15625_R0	4395.29							g36006	4844.79							g43517	667.722
g35035	4389.52							g22483	4841.95							g35093	666.196
g64077	4380.78							g61117	4833.24							adi2mcaRNA39206_R0	665.462
g48406	4377.74							g25687	4818.35							g61708	664.362
g28905	4376.75							g36440	4807.93							g21662	664.117
adi2mcaRNA15775_R0	4376.41							g55162	4805.69							g39875	661.929
g35988	4376.06							g27725	4798.35							g54240	660.615
adi2mcaRNA15149_R1	4374.84							g50761	4798.03							g70624	653.671
g60073	4373.31							adi2mcaRNA26115_R0	4773.76							g27565	652.386
g19962	4371.66							g33619	4772.78							g68020	652.282
adi2mcaRNA18213_R0	4369.42							g52840	4769.53							g828	649.586
g24365	4362.73							g52828	4759.64							g30589	649.505
g23023	4359.85							g60240	4748.3							g54957	648.61
g34405	4343.37							g42825	4741.13							g3997	648.47
g67449	4328.33							g35517	4722.08							g9829	645.775
g69802	4320.39							g63039	4719.97							g25962	644.903
g33963	4317.61							g4244	4707.29							g53787	644.644
g24237	4317.06							g17178	4691.21							g53131	644.169
g38073	4315.81							g19219	4690.82							g31448	643.021
g58634	4310.28							g32331	4680.22							g70028	641.996
g57778	4308.07							g26872	4671.92							g35271	641.791
g3899	4295.35							g7032	4670.65							g57778	640.777
g71123	4293.72							g66868	4668.33							g43277	640.709
g55627	4285.14							g44798	4664.99							g26240	638.886
g71052	4282.87							g45079	4663.75							g40754	638.422
g4187	4280.73							g46726	4652.63							g14884	635.849
g34598	4280.7							g33664	4651.77							g55360	635.139
g40754	4278.93							g33745	4638.91							g30538	633.228
g59988	4271.41							g34594	4634.81							g62421	632.66
g34632	4268.18							g60246	4611.59							adi2mcaRNA5468_R0	632.211
adi2mcaRNA20514_R0	4267.98							g61997	4608.27							g64796	630.299
g28004	4265.76							g25181	4586.77							g64806	630.009
g23471	4264.67							g35274	4566.27							g66825	629.755
g35868	4258.66							g71123	4565.05							g43425	628.332
g55133	4256.78							adi2mcaRNA23574_R0	4558.93							adi2mcaRNA37907_R0	626.851
g37692	4242.5							g60917	4542.51							adi2mcaRNA29365_R0	626.418
g61778	4241.73							g3899	4537.91							g53422	625.951
g26590	4235.14							g36357	4534.95							g18270	625.829
g58571	4233.03							g47418	4532.13							g48220	625.443
g49978	4227.5							g29880	4524.89							g2150	624.577
g45704	4217.99							g26476	4519.75							g62582	624.56
g66594	4213.41							g34871	4519.43							adi2mcaRNA3988_R0	622.883
g44188	4208.77							g38661	4516.95							g71159	622.333
g57099	4207.91							g63102	4516.65							g63033	622.179
g40390	4205.82							g5231	4516.23							g9019	621.324
g14701	4205.77							g34405	4503.77							g50608	620.982
g21661	4200.25							adi2mcaRNA10296_R0	4502.71							g34422	620.455
adi2mcaRNA23392_R0	4188.3							g25823	4492.74							g23510	619.66
adi2mcaRNA7157_R0	4177.1							g38789	4489.49							g8144	619.58
g45218	4169.34							g39718	4485.47							g60902	619.248
g28318	4162.45							g18493	4479.29							g39406	618.455
g32329	4141.37							g40326	4471.44							g65054	616.218
g61120	4130.56							g55627	4463.46							g41765	616.044
g22487	4127.92							g15721	4444.9							g35322	615.907
g3076	4120.42							g25116	4437.94							g24181	614.963
g9019	4117.47							g6446	4434.56							g46272	613.723
g17706	4117.33							g67353	4431.24							g55770	613.396
g65888	4102.04							g71154	4421							g4182	613.357
g46002	4099.99							adi2mcaRNA22237_R0	4410.51							g34979	612.525
g41412	4099.82							adi2mcaRNA5413_R0	4409.61							g62141	611.76
adi2mcaRNA34277_R0	4090							g41491	4408.04							g29284	611.341
g59495	4089.34							g67848	4404.42							g23497	610.934
g33581	4087.68							g67777	4397.02							adi2mcaRNA27090_R0	609.836
g11631	4082.02							g474	4384.03							adi2mcaRNA23861_R1	609.653
g41403	4078.75							g49603	4382.08							g26367	608.325
g2854	4077.8							g66568	4356.26							g43364	607.85
g47147	4072.77							g6697	4352.88							g28247	607.527
g41407	4056.19							g48810	4339.03							g65405	605.804
g51665	4045.64							adi2mcaRNA10809_R0	4328.35							g34553	605.667
g52461	4035.1							g23862	4312.05							g55985	604.717
g18729	4033.34							adi2mcaRNA10013_R0	4298.07							g40329	603.532
g27156	4030.22							g48104	4294.26							g46062	602.727
g41960	4023.28							g27773	4289.37							g6679	602.349
g4244	4019.99							g39439	4286.24							g32972	602.231
adi2mcaRNA22032_R0	4018.61							g48130	4268.61							g38696	601.968
adi2mcaRNA13842_R0	4013.09							g13409	4266.5							g54289	601.161
g41646	4012.01							g43928	4264.74							g25477	601.016
g31448	4008.21							g38208	4263.98							g33570	600.971
g23512	4001.54							g30148	4262.28							g61924	597.965
g30466	3997.75							g29188	4260.1							g61923	597.228
g28332	3992.84							g34838	4251.82							g57645	595.539
g35082	3992.02							g66109	4246.15							adi2mcaRNA29127_R3	594.914
g6367	3989.45							adi2mcaRNA28113_R0	4236.82							g33294	594.688
g33544	3977.99							adi2mcaRNA23392_R0	4236.32							g13817	594.476
g59066	3969.28							g23810	4229.35							g35965	593.925
g50913	3966.1							g33670	4222.45							g62840	593.653
g36440	3964.76							g36876	4200.64							adi2mcaRNA21267_R0	593.463
g58350	3957.62							g70018	4195.51							g31936	591.601
g50398	3947.46							g16591	4189.74							g53626	587.649
g9228	3933.86							g48485	4189.14							g67353	587.584
g58012	3931.28							g9983	4184.76							g48275	587.481
g24174	3917.58							g37588	4176.33							g17750	587.162
g71159	3902.03							g62001	4169.59							g42581	585.354
g693	3898.3							g24174	4166.4							g43733	585.117
g18794	3897.15							adi2mcaRNA24510_R0	4155.36							g3211	584.119
adi2mcaRNA30199_R0	3891.86							g51665	4143.21							g17952	583.963
g35961	3889.86							g33573	4142.6							g3083	583.454
g68839	3887.78							g46331	4137.24							g25250	580.936
g10954	3887.35							g25076	4124.38							g28240	576.747
g35550	3883.04							g67449	4124.19							g6861	576.213
g70897	3871.12							g35868	4122.65							g67045	575.31
g60401	3869.69							g29496	4116.54							g46958	575.163
g28570	3867.15							g6367	4111.9							g30168	574.07
g23810	3860.39							g41454	4106.7							g62710	573.833
g10123	3860.09							adi2mcaRNA36665_R0	4104.05							g26869	571.848
g35274	3859.94							adi2mcaRNA13157_R0	4102.27							adi2mcaRNA27975_R2	570.989
g41221	3851.86							g35153	4085.15							g64708	568.351
adi2mcaRNA36018_R0	3846.33							g48408	4049.74							g26774	568.025
g45328	3843.29							g41221	4031.39							adi2mcaRNA15301_R0	567.252
adi2mcaRNA1144_R0	3842.97							g68164	4026.56							adi2mcaRNA32600_R0	566.172
g6697	3832.03							g6744	4022.87							g31430	565.926
g32278	3825.76							g24210	4016.72							g68016	563.144
g10291	3814.98							g1591	4014.91							g1765	561.565
g33745	3813							g40933	4012.97							g17761	560.402
g22529	3809.97							g26556	4007.16							adi2mcaRNA4109_R0	559.559
g65418	3806.39							g36962	4002.82							g49656	558.817
g67244	3803.8							g22541	4000.78							g50718	558.434
g33179	3793.63							g45310	3983.85							g54961	558.03
g48130	3787.43							adi2mcaRNA132_R0	3981.17							g54402	557.93
g57204	3786.59							g46706	3979.57							g22580	557.396
g45079	3780.38							g62793	3962.01							g3313	556.649
g41765	3763.14							g57778	3960.4							g16872	556.332
g28270	3762.24							g475	3956.31							g10407	555.332
g41454	3761							g40462	3945.04							g31709	554.858
g53482	3752.65							g12122	3927.15							g31413	554.325
g27565	3743.68							adi2mcaRNA36621_R2	3926.58							g68839	554.073
g26328	3737.99							g62789	3924.38							g19586	553.611
g10421	3736.68							g48406	3921.07							g48079	553.094
g29393	3736.51							g53131	3918.96							g53133	551.508
g53626	3735.65							g25164	3913.35							g67456	551.496
g28906	3731.44							g25300	3912.93							g43928	551.348
g70098	3713.18							g58634	3909.54							g32467	551.148
g33664	3708.45							g33963	3907.42							g57753	550.712
g52607	3707.88							g49073	3897.88							adi2mcaRNA41444_R0	550.398
g36876	3696.75							g61692	3897.26							g42818	550.349
g33995	3688.66							g11796	3888.02							g3489	548.518
g28910	3688.39							g63466	3878.06							adi2mcaRNA14391_R0	547.492
g34871	3677.02							adi2mcaRNA20459_R0	3878.02							g44167	547.365
g14639	3675.37							g31430	3874.22							g42810	547.016
g36962	3670.69							g7382	3858.03							g25266	544.899
g67848	3668.05							g34633	3837.9							g36894	543.335
g24011	3667.43							g6392	3836.74							g4187	542.321
g70157	3653.56							g55710	3829.54							g55653	542.073
g36442	3651.63							g69042	3825.73							g1829	541.177
g3489	3651.02							g29797	3821.3							g67355	541.014
g35869	3650.88							g42288	3820.72							g27091	540.137
adi2mcaRNA2036_R0	3646.83							g17706	3820.7							g34701	539.659
g17324	3645.45							g58391	3819.69							adi2mcaRNA34909_R0	538.226
g66257	3614.64							g15185	3816.95							g24365	538.112
g25823	3607.7							g38356	3815.4							g23034	537.392
g18170	3605.76							g54035	3811.37							g35963	536.43
g49951	3602.16							g23173	3804.78							g58395	535.841
g23862	3594.7							g23859	3802.07							g30299	535.568
adi2mcaRNA4698_R0	3590.08							g10291	3799.68							g41333	535.126
g3318	3553.31							g41403	3799.63							g9557	535.112
g33573	3549.06							g67869	3796.11							g45176	534.845
g2600	3548.35							g67732	3788.5							g32785	534.604
adi2mcaRNA28446_R0	3548.27							g36005	3784.41							g62711	534.566
g34628	3547.86							g22391	3784.13							g28854	533.451
g26508	3547.2							g66594	3781.66							g70829	533.309
g25429	3544.82							adi2mcaRNA5415_R0	3779.03							g53594	532.687
g35177	3537.14							g28245	3776.94							g65966	532.013
g56364	3534.08							g59988	3775.48							g43974	531.548
g25300	3532.29							g18530	3758.56							g66113	531.441
g70474	3522.55							g34598	3739.42							g58301	531.158
g28694	3518.91							g66919	3736.86							g33598	529.085
g24023	3514.82							g27156	3731.24							g50929	528.274
g50384	3512							g27860	3729.98							g68798	527.921
g29875	3511.5							g18729	3727.29							g64468	526.973
adi2mcaRNA30384_R0	3505.31							g64077	3725.35							g27732	526.763
g41768	3504.35							g9228	3722.57							g69789	525.508
g478	3501.29							g60073	3720.61							g7192	525.261
g55653	3497.54							g45218	3719.94							g49624	525.261
g39718	3497.26							g22289	3700.23							g48085	524.515
g60240	3496.48							g1763	3697.14							g48376	524.185
g29572	3496.45							g33581	3690.34							g69325	523.81
g52823	3486.28							g34656	3690.1							g1401	522.818
g2205	3480.24							g24090	3684.49							adi2mcaRNA10809_R0	522.567
g60998	3480.12							adi2mcaRNA22032_R0	3680.43							g63509	521.961
g22495	3475.91							g43420	3677.65							g50913	520.94
g35153	3474.82							g7933	3660.26							g58571	519.395
g1837	3474.28							g59495	3652.55							g4149	519.383
g62823	3470.93							g44666	3641.02							g34402	519.315
g29169	3457.47							g28812	3639.31							g36820	518.666
g43173	3454.12							g71286	3623.42							adi2mcaRNA3536_R0	518.156
g8631	3453.72							adi2mcaRNA21163_R1	3620.36							g29572	516.77
g64088	3450.78							g22487	3617.62							g15611	516.31
g27645	3449.33							g41831	3614.52							g62389	516.282
g25181	3446.6							g46694	3593.75							g41937	516.127
g67295	3445.12							g23025	3590.61							g54026	516.106
g4392	3431.62							adi2mcaRNA32887_R1	3580.36							g57244	515.751
g48411	3429.13							g5229	3572.53							g50760	514.897
g44547	3428.56							g41960	3569.79							g48066	514.406
g32152	3428.39							g2078	3567.81							g71354	514.136
g54490	3420.35							g22610	3566.53							g59320	512.642
g67354	3419.88							adi2mcaRNA1144_R0	3562.79							g31718	512.566
g28854	3417.51							g52823	3553.97							g24099	511.09
g25123	3411.01							g35915	3547.47							g35481	510.372
g37399	3410.73							g46970	3545.94							adi2mcaRNA8071_R0	508.716
g39927	3405.71							g58575	3542.93							g53873	507.241
g64474	3401.28							g60929	3539.12							g57655	506.983
g35029	3391.35							g44169	3537.9							g34820	506.767
g5907	3383.83							g57204	3528.41							g49643	506.196
g62793	3378.83							g5324	3519.64							g25938	505.682
g21648	3377.89							g26557	3514.05							g31910	505.148
g53888	3377.02							g29572	3511.82							g48584	504.333
g34416	3371.68							g17648	3504.93							g18732	504.319
g48409	3370.78							g61924	3504.56							g47549	504.279
adi2mcaRNA13035_R0	3370.35							g48825	3498.41							g47145	503.959
adi2mcaRNA35177_R0	3362.51							g28243	3496.76							g62658	503.907
g43046	3357.83							g12442	3487.05							g47027	502.126
g22380	3351.65							g9676	3485.04							g58873	501.989
g69404	3347.01							g70471	3485.03							g12264	501.799
g49917	3339.1							g27609	3471.45							g21661	501.33
adi2mcaRNA32887_R1	3334.56							g8148	3469.92							adi2mcaRNA6309_R0	500.212
g7040	3326.02							g68745	3469.03							g29744	500.106
g30461	3320.37							g59066	3462.68							g15438	499.755
g48104	3309.79							g53095	3455.07							g28212	499.598
g26556	3308.08							g49917	3453.68							g58056	498.921
adi2mcaRNA24713_R0	3305.83							g31448	3448.87							g35326	497.899
g42433	3305.49							g26508	3442.18							g10192	496.678
g55385	3303.4							g38073	3440.49							g39003	496.599
g33796	3299.9							g45343	3425.21							g14885	495.808
adi2mcaRNA10685_R0	3299.81							g27090	3416.76							g51051	495.788
g50688	3297.84							g33722	3413.73							g47225	494.127
g58646	3282.43							g70474	3409.46							g68153	493.917
g45332	3281.59							g47444	3406.74							adi2mcaRNA36509_R0	492.222
g23025	3280.57							adi2mcaRNA39206_R0	3406.02							g21658	492.119
g23303	3279.2							g27565	3386.51							g57524	491.791
g53742	3267.49							g14552	3380.29							g45211	491.716
g34641	3264.33							g39001	3375.72							g55233	491.339
g34002	3261.01							g70157	3373.47							g29301	491.327
g24111	3255.12							g34163	3371.42							g54585	490.673
adi2mcaRNA4109_R0	3248.67							g28342	3370.2							g57204	490.449
g19219	3247.77							g24088	3367.49							g46335	489.873
g15185	3244.51							g54783	3367.48							g48774	489.832
g24047	3242.26							g7099	3366.35							g46004	489.723
g41344	3241.83							adi2mcaRNA28446_R0	3355.19							adi2mcaRNA13343_R0	489.633
g56265	3241.14							g35456	3341.73							g65924	489.534
g32298	3236.02							g62823	3339.07							g67777	488.367
g32785	3232.81							g30423	3334.12							g38004	487.799
g29880	3230.52							g29329	3325.37							adi2mcaRNA31485_R0	487.388
g25687	3224.38							g60644	3324.95							g33499	487.376
g48825	3222.18							g2855	3324.43							g541	486.618
g60644	3221.15							g51104	3324.24							g609	486.034
g66958	3215.62							g70877	3322.74							g39255	485.996
g61924	3215.58							g9769	3312.05							g46341	485.301
g17178	3213.57							g1927	3302.64							g24084	485.22
g33927	3212.94							adi2mcaRNA354_R0	3298.37							g50737	485.207
g46625	3209.88							adi2mcaRNA20514_R0	3290.57							g35088	484.99
g49149	3189.76							g37399	3286.22							g33924	484.888
g27609	3183.02							g21536	3285.71							g34640	484.123
g63102	3180.95							g52546	3284.16							g28088	484.123
g42236	3180.18							g43402	3280.69							g46710	483.492
g64607	3175.95							g61994	3278.55							g22270	482.62
adi2mcaRNA32162_R1	3172.67							g28318	3275.67							g44595	482.002
g21906	3170.6							g9019	3274.99							g25676	481.965
g6744	3160.47							g51634	3274.16							adi2mcaRNA31290_R2	481.705
g2148	3152.29							g66881	3270.58							g66866	481.312
adi2mcaRNA19256_R0	3144.7							g35550	3268.18							g59713	481.256
g58092	3143.75							g65888	3265.67							g5581	479.309
g12778	3139.56							g40404	3262.82							g7093	479.28
g63273	3137.12							g32278	3258.3							g29648	478.149
g68200	3125.41							g43595	3258.29							g39755	476.71
g38789	3122.04							g60998	3255.71							g30049	475.415
adi2mcaRNA23838_R0	3119.59							g35988	3254.68							adi2mcaRNA35908_R0	474.158
g33964	3117.06							g68200	3251.57							g41953	473.662
g55062	3103.38							g39406	3250.8							g44175	473.382
g5372	3102.96							g48411	3238.11							g58159	472.71
g37171	3102.29							g23303	3233.97							g64474	472.389
g36183	3100.22							g27900	3231.82							g34401	472.233
g66568	3093.96							g71045	3227.92							g35873	471.98
g51662	3090.42							g35359	3223.84							g33940	471.516
g54947	3086.96							g39412	3220.38							adi2mcaRNA4350_R0	471.33
g56217	3086.59							g32108	3211.89							g54170	470.622
g55652	3082.19							g61989	3209.8							g7925	469.815
g20742	3081.63							g39427	3209.32							g29890	469.508
g61692	3079.2							g37484	3207.42							adi2mcaRNA32466_R0	469.319
g39412	3074.05							g57805	3199.55							g45858	467.945
g37040	3066.67							g51130	3189.25							g34449	467.919
adi2mcaRNA25316_R8	3056.17							g55133	3187.77							g6411	467.535
adi2mcaRNA5195_R2	3055.52							g35322	3185.17							adi2mcaRNA8162_R0	466.282
g9382	3054.48							g39875	3182.31							g35084	465.944
g32231	3052.02							g35182	3181.22							g16969	465.296
g32811	3046.75							g56274	3177.64							adi2mcaRNA11601_R0	464.927
g53481	3043.12							g18529	3176.56							g7120	464.623
g22806	3041.87							g40127	3172.77							g27566	462.91
g52470	3041.75							adi2mcaRNA34277_R0	3171.55							g27841	462.168
g47459	3041.59							g28570	3169.4							adi2mcaRNA1849_R0	461.981
g53180	3037.9							g47549	3166.31							g57619	461.541
g23836	3037.1							g45455	3161.36							g38348	461.468
g67045	3035.94							g71159	3157.57							adi2mcaRNA32897_R0	461.264
g39419	3035.11							g28004	3155.31							g4656	461.103
g50627	3033.1							g16165	3155.08							g56733	459.072
g9983	3028.65							adi2mcaRNA16708_R0	3145.58							g46397	459.001
g53335	3025.11							g42822	3144.49							g40127	458.961
g35185	3022.5							g71052	3140.51							g33395	458.498
g33870	3021.17							g52054	3140.1							g981	457.849
g13202	3020.52							g53482	3129.88							g68152	457.569
g7382	3020.32							adi2mcaRNA11601_R0	3128.66							g28211	457.144
g62854	3018.76							g58599	3128.24							g67546	457.094
g55138	3016.71							g28910	3125.59							g71200	456.826
g60306	3012.24							g30191	3116.33							g59483	456.304
adi2mcaRNA3566_R0	3011.7							g25429	3110.08							g64056	456.054
g52546	3009.11							g52461	3108.77							g33873	455.858
g40913	3007.51							g49953	3106.55							g39760	455.726
g30299	3001.17							g39870	3102.35							g59070	455.497
g24291	2996.55							g48409	3097.04							adi2mcaRNA32829_R0	455.425
g7488	2984.08							g35246	3095.08							g70715	455.242
g9260	2983.33							g22806	3093.49							g33573	454.068
g33278	2981.22							g16308	3081.49							g36974	453.871
g32204	2975.66							g67849	3076.27							adi2mcaRNA28306_R0	453.523
g63045	2972.73							g39419	3071.61							g56211	453.331
g25122	2964.37							adi2mcaRNA17305_R5	3066.23							g51183	452.293
g58575	2962.73							g31738	3065.55							g46063	451.856
g69560	2960.81							adi2mcaRNA15149_R1	3065.4							g22700	451.81
g60687	2958.2							g49156	3064.68							g52595	451.69
g28812	2954.51							g24011	3059.26							g23712	451.521
g32286	2946.4							adi2mcaRNA2033_R0	3053.5							g41048	451.287
g32752	2942.77							g55652	3053.07							g39844	451.268
g63055	2941.94							g5907	3048.54							g32379	450.242
g70877	2936.56							g21700	3037.35							adi2mcaRNA15775_R0	450.189
g64426	2933.08							g28936	3032.3							g48573	448.508
g12782	2930.07							g28694	3029.22							g68019	448.272
g34838	2925.99							g23331	3028.05							g17982	448.217
g1763	2925.83							g38717	3023.98							g1499	447.364
g33292	2917.69							g53626	3023.16							g41334	446.781
g51676	2915.96							g50608	3022.77							g6737	446.444
g37484	2914.54							g67045	3020.19							g61778	445.771
g62389	2912.56							g24047	3017.6							g31700	445.713
g29496	2900.31							g60351	3006.79							g23722	444.418
adi2mcaRNA5415_R0	2897.89							g66570	3006.71							g25062	443.263
g69883	2896.28							g42236	3005.78							adi2mcaRNA21392_R0	441.272
g13104	2891.81							g12286	3005.11							g28809	440.63
g34809	2886.05							g25286	3002.06							g47629	440.52
g49855	2872.79							g5056	3000.06							g66932	440.042
adi2mcaRNA8409_R0	2872.26							g3489	2998.79							g9062	439.979
g48408	2859.44							g50398	2996.17							g50382	439.597
adi2mcaRNA3334_R0	2858.36							g71122	2993.81							g56936	439.489
g37588	2856.73							g33291	2992.23							g62125	439.401
g25076	2856.67							g37235	2987.23							g45863	439.004
g41902	2852.51							g37171	2986.43							g58596	438.443
adi2mcaRNA13157_R0	2848.62							g41458	2985.79							g53116	438.258
g29948	2843.51							g43941	2984.36							adi2mcaRNA6730_R0	437.305
g51130	2836.6							g50384	2984.31							g61994	436.502
g19264	2834.73							g61778	2984.31							g3318	436.428
g30191	2833.62							g5046	2978.3							g2233	435.677
adi2mcaRNA37022_R0	2829.85							g41435	2977.31							g12667	434.835
g24210	2829.23							g42437	2976.04							g57117	434.691
g22319	2824.14							g23463	2974.34							g1896	434.314
g70625	2823.8							adi2mcaRNA30384_R0	2965.97							g9	433.609
g44543	2823.54							g71505	2964.88							g58503	433.599
adi2mcaRNA5211_R0	2816.23							adi2mcaRNA6092_R0	2961.59							g67317	433.094
g22610	2815.91							g67243	2952.56							g9832	432.85
g31881	2813.49							adi2mcaRNA7495_R0	2943.75							g25138	431.663
g8145	2809.56							g48645	2939.09							g2532	431.144
g58190	2809.28							g48563	2920.44							g53095	430.086
g25423	2804.57							g10421	2919.46							g62662	430.029
g49624	2804.05							g27153	2911.01							g41206	428.902
g6766	2802.93							g44543	2906.31							g35181	428.467
g67188	2802.74							g34510	2901.93							g46907	428.148
g64909	2800.56							g35260	2896.36							g57176	427.548
g45455	2797.69							g11422	2896.08							g25502	427.382
g60916	2793.13							g45704	2894.63							g3227	426.706
g58334	2789.3							g50710	2892.83							g55982	426.586
g66109	2788.7							g50929	2883.76							g22696	426.564
g67820	2785.86							g70470	2882.9							g32152	426.072
g55710	2776.57							g52728	2877.82							g28269	425.756
g46349	2774.18							g51662	2872.87							g36813	425.352
g8982	2772.76							adi2mcaRNA8962_R0	2870.62							g15365	425.025
g33722	2770.98							g18794	2869.6							g35039	424.926
g30189	2769.86							adi2mcaRNA4698_R0	2869.5							g58494	424.742
adi2mcaRNA10614_R0	2769.52							g60687	2864.92							g44801	424.714
g1591	2766.48							g32301	2864.43							adi2mcaRNA37022_R0	423.818
adi2mcaRNA4043_R0	2766.05							adi2mcaRNA13109_R0	2862.87							g20211	423.771
adi2mcaRNA18837_R0	2765.83							g64759	2862.28							g46332	423.513
g33545	2765.46							g29878	2861.57							g64751	423.474
g477	2754.59							g14639	2858.45							g28268	423.095
g33338	2753.25							g32230	2858.04							g39935	423.029
adi2mcaRNA39206_R0	2746.14							g57524	2857.21							g6665	422.248
adi2mcaRNA19502_R1	2745.26							g39927	2856.44							g69698	421.925
g57801	2742.43							adi2mcaRNA11654_R0	2855.67							g57516	421.889
g41435	2740.66							g45332	2850.27							g70879	421.539
g9823	2739.54							g7488	2847.86							g23892	421.483
g26274	2735.18							g33927	2844.7							g65035	421.224
g27727	2729.58							g4335	2840.26							g23797	420.363
g35444	2723.87							g3329	2837.8							adi2mcaRNA26986_R0	419.723
g27153	2723.23							g35082	2836.6							g37368	419.398
g56764	2723.11							g47147	2831.62							g43398	419.182
g66188	2723.09							g40461	2827.99							g6967	418.248
g49041	2723.07							adi2mcaRNA13751_R0	2820.05							adi2mcaRNA17502_R0	417.026
g28245	2720.41							g33796	2817.81							g50735	416.997
adi2mcaRNA32510_R0	2719.92							g70897	2815.85							g16525	416.863
g33394	2711.54							g62913	2813.68							g8029	416.569
g26410	2707.87							g55629	2807.57							g4818	416.524
g55130	2706.5							g33292	2807.51							adi2mcaRNA27105_R0	416.345
g54783	2703.99							g17451	2806.82							g39845	415.695
g5825	2702.78							g60899	2805.9							g62731	415.667
g71003	2702.39							g66161	2799.82							g30302	415.62
g26557	2697.31							g39845	2796.48							g43661	415.27
g60351	2696.74							g9580	2794.57							g62143	415.036
g67664	2694.67							g26534	2793.9							g24371	414.771
g71122	2693.78							g70879	2791.24							g1770	413.936
g8792	2693.31							g9357	2783.96							g36766	413.7
g30190	2692.5							g1923	2782.19							adi2mcaRNA10298_R0	413.632
g50546	2678.47							g55385	2780.77							g53240	413.537
g40404	2676.75							g71003	2780.15							g60646	413.466
g27045	2676.44							g6751	2779.97							g27864	413.462
g22270	2673.92							g70732	2779.64							g3494	413.341
g54035	2667.44							g46869	2776.02							adi2mcaRNA1021_R0	413.122
g25228	2665.68							g64806	2774.83							g46002	412.943
g12399	2663.5							g21761	2774.54							g41215	412.693
g7032	2655.38							adi2mcaRNA4109_R0	2772.54							g62128	412.552
g71154	2654.41							g32152	2762.65							g45536	412.392
g18225	2648.43							g2148	2760.08							g6392	412.333
g2189	2647.24							adi2mcaRNA20985_R0	2757.87							g58864	412.045
g24090	2643.1							g65102	2757.31							g52872	412.026
g5672	2641.3							g40390	2755.63							g8631	411.983
g9281	2638.91							g66113	2754.61							g7313	411.902
g2855	2636.75							g55062	2752.12							g36349	411.723
g69705	2635.51							g64607	2751.66							g66326	411.196
g66881	2631.15							g2055	2751.35							g5825	411.094
g8148	2630.82							g30299	2749.4							g67738	410.465
g6327	2629.13							g69497	2745.53							g50898	409.312
adi2mcaRNA30490_R0	2627.41							g41765	2745.15							adi2mcaRNA13665_R0	408.602
g66161	2626.4							g64054	2742.09							g56095	407.395
g26534	2624.1							g67820	2740.72							g38253	406.494
g43032	2623.57							g12940	2736.9							adi2mcaRNA13157_R0	405.88
g9832	2621.46							g28997	2736							g70335	405.82
g9580	2614.81							g62854	2733.74							adi2mcaRNA20119_R1	405.691
g10420	2614.34							g61983	2733.69							g33463	405.427
g55528	2613.33							g16304	2731.4							g50687	405.337
adi2mcaRNA26974_R3	2606.36							g30189	2730.03							g48684	404.797
g40461	2603.63							g60581	2727.19							g44168	404.334
g6672	2601							g23891	2725.07							g35986	404.027
adi2mcaRNA34600_R0	2597.62							g33179	2715.44							g26425	403.958
g18530	2596.44							adi2mcaRNA1589_R1	2712.55							g23860	403.559
g6368	2595.77							g37401	2709.79							g41764	403.54
g48638	2593.83							g66731	2707.11							g22690	403.538
g37401	2592.37							g25228	2707.06							adi2mcaRNA4931_R0	402.69
g61008	2591.59							g22529	2705.88							g66570	401.759
g22807	2589.11							adi2mcaRNA39690_R0	2703.67							g23836	401.677
g68938	2586.8							g70625	2686.66							g18278	401.588
g29878	2586.43							g58012	2671.16							g55310	401.333
g52840	2585.83							g32889	2670.92							g52743	401.275
g54239	2585.5							g31965	2670.26							g26872	399.907
g16570	2584.84							g27150	2667.5							g8145	399.635
g52039	2582.82							g8792	2666.35							g23025	399.486
g50933	2578.2							g33875	2665.73							g44544	399.477
adi2mcaRNA7046_R1	2574.22							g56986	2660.82							g33169	399.116
g22568	2574.13							g26303	2659.63							g62266	398.915
adi2mcaRNA18655_R0	2571.52							g62140	2656.56							g9975	398.863
g44601	2568.56							g69404	2656.09							g45554	398.762
g37235	2566.52							g26328	2655.39							g28065	397.781
g42810	2565.11							g62004	2646.18							g27197	397.647
g35337	2561.1							g33464	2644.77							g24032	396.984
g45775	2558.68							g40317	2644.43							g31916	395.911
g66113	2557.21							g35029	2643.67							g24054	395.408
g30967	2557.03							g18352	2639.26							g62005	394.872
adi2mcaRNA4009_R0	2556.24							g53888	2638.99							g3102	394.826
adi2mcaRNA29576_R0	2554.7							g43733	2638.98							g39699	394.544
g17166	2554.29							g62840	2635.6							g5373	394.198
g54968	2552.24							g45515	2635.45							g21648	393.889
g62769	2551.75							g27843	2635.3							g45540	393.861
g22391	2550.33							g37530	2632.09							g35416	393.705
g4741	2549.76							g7040	2628.93							g59993	393.546
g31033	2549.06							g35177	2626.6							g26554	393.321
g56722	2547.79							g33598	2618.45							g21904	392.896
g33940	2543.77							g49041	2617.39							g14107	391.945
g10405	2543.57							adi2mcaRNA31368_R2	2611.96							g35249	391.583
g42822	2539.99							g31033	2606.38							g56370	391.262
g22484	2539.39							g28693	2603.88							g60202	390.937
g46331	2538.29							adi2mcaRNA825_R0	2595.78							g29797	390.159
g23942	2530.74							g17502	2587.8							g60698	390.009
g30302	2525.03							g40421	2583.95							g57436	389.941
adi2mcaRNA10809_R0	2523.54							g46697	2580.45							g33664	389.932
g38396	2523.44							g39155	2576.63							g53481	389.536
g66185	2521.45							adi2mcaRNA12507_R0	2576.37							g33800	389.508
g39427	2519.84							adi2mcaRNA24713_R0	2575.43							g32068	389.354
g39155	2515.8							g57118	2569.09							g45538	389.108
adi2mcaRNA36665_R0	2515.34							g69883	2569							g53467	388.987
g48563	2512.66							g8376	2568.61							g52065	388.935
g25286	2507.27							g10123	2567.71							g45164	388.317
g7742	2505.53							g8981	2566.49							g10900	387.582
g22498	2503.95							g69705	2565.71							g29279	387.448
g60899	2498.27							g24023	2560.6							g53496	387.162
adi2mcaRNA10369_R0	2495.42							g6672	2559.48							g4643	387.158
g68918	2491.35							g32752	2555.1							g42006	386.341
adi2mcaRNA2721_R0	2489.55							g66110	2553.36							g1749	386.207
g34510	2483.11							adi2mcaRNA19256_R0	2548.27							g66172	385.922
g67855	2478.72							g66188	2548.02							g45446	385.462
g54247	2471.81							g69560	2539.08							g28774	385.283
g51181	2471.21							g5230	2529.55							g20743	385.05
g48485	2470.51							adi2mcaRNA3334_R0	2526.72							g47439	384.33
g22569	2466.66							adi2mcaRNA31040_R0	2523.09							g40474	384.087
g3898	2466.41							g55917	2522.96							adi2mcaRNA16049_R0	383.621
g55917	2455.77							g43046	2519.48							g29901	383.54
g48689	2450.51							g477	2519.34							g33595	382.939
adi2mcaRNA11654_R0	2450.09							g24972	2513.69							g39554	382.717
g42825	2445.83							g48416	2508.79							g36739	382.327
g50381	2439.65							g70098	2508.64							adi2mcaRNA23140_R0	382.29
adi2mcaRNA27568_R0	2438.14							g23825	2507.68							g5231	381.78
g22586	2435.86							g35028	2504.52							g58011	381.739
g33652	2435.05							g67188	2502.49							adi2mcaRNA23059_R0	381.677
g21186	2425.25							g32785	2502.01							g37348	381.636
adi2mcaRNA21193_R0	2422.75							g54034	2500.14							g48645	381.518
g54279	2421.11							g58859	2497.39							g69883	381.317
g53769	2417.68							g26875	2496.24							g56372	381.182
g57655	2414.08							g36442	2493.98							g24979	381.008
g53131	2412.2							g49199	2482.62							g16165	380.956
g49168	2410.46							g26274	2481.9							g34169	380.633
g57118	2408.59							g32231	2478.14							g45142	380.066
g51104	2406.76							g59993	2469.3							g29794	378.265
g17420	2405.69							g23023	2469.25							g30541	378.255
g33795	2398.24							g21906	2468.7							g5718	377.456
g1922	2397.49							g2189	2467.91							g28906	377.128
g17451	2395.63							g34809	2466.68							g45332	377.064
g2720	2391.14							g66114	2466.54							g56360	376.516
g38594	2390.9							g41764	2464.94							g59715	376.122
g63838	2390.05							g55065	2460.21							adi2mcaRNA21380_R0	375.751
g66110	2389.5							g64763	2459.24							g26852	375.618
g66532	2388.93							g53607	2457.49							g30655	375.013
g48846	2387.34							g17069	2450.61							g9694	374.523
g46694	2383.81							g67855	2449.7							g34163	374.23
g40462	2382.42							g66185	2445.69							g56732	374.104
g21536	2382.35							g63377	2436.89							g40930	374.092
g23863	2377.13							adi2mcaRNA23243_R0	2436.75							g18794	374.064
g64806	2376.64							g56265	2434.48							g53242	373.819
adi2mcaRNA29020_R0	2376.17							g35237	2431.57							g38356	373.262
adi2mcaRNA27224_R0	2375.42							g36739	2431.07							adi2mcaRNA29187_R0	372.683
g34656	2369.31							adi2mcaRNA25068_R0	2430.75							g54369	372.562
g47025	2368.89							g22260	2428.2							g29278	372.514
g43271	2368.26							g478	2424.83							g54598	371.904
g50738	2365.24							g52039	2424.27							g2266	370.95
g59993	2363.65							g53481	2423.39							g56247	370.631
g29797	2361.82							adi2mcaRNA15538_R0	2422.87							g37104	370.396
g34878	2359							g65832	2422.23							g46213	370.176
g46697	2358.52							g46410	2416.08							adi2mcaRNA35549_R0	370.141
g28693	2358.5							g35483	2415.77							g43933	370.133
g34604	2351.69							adi2mcaRNA1589_R6	2413.85							g14106	369.28
g43165	2346.83							g62769	2413.21							g39441	368.891
g2233	2346.73							g3318	2408.37							g40914	368.845
g39719	2345.06							g47459	2407.94							g40775	368.788
g6370	2342.46							g50627	2406.98							g30027	368.69
g6392	2342.41							g49145	2404.87							g26280	368.172
g67110	2332.12							adi2mcaRNA8493_R0	2403.47							g22532	367.338
g58859	2328.03							g49951	2400.38							g33596	367.257
g5056	2327.02							g28906	2399.71							g17903	366.839
g22289	2321.74							g57655	2399.61							g32706	366.664
g21761	2318.28							g18225	2399.15							g35437	366.576
g21440	2315.23							adi2mcaRNA32510_R0	2397.97							g68201	366.176
g62913	2313.51							g48273	2397.24							adi2mcaRNA20514_R0	365.336
g25505	2301.33							g5825	2395.62							g50902	365.239
g44689	2300.11							g22807	2393.74							g49149	364.745
g14571	2299.82							g24100	2393.07							g26559	364.464
g59540	2298.99							g41056	2390.25							g57646	364.319
adi2mcaRNA15538_R0	2298.72							g48638	2388.46							g19264	364.264
adi2mcaRNA5620_R0	2297.45							g4707	2387.74							g29710	363.845
g25062	2291.78							g31781	2384.83							g1763	363.804
g64953	2289.25							g53180	2382.86							g5468	363.722
g62001	2288.2							g41054	2382.09							g43032	363.252
g28903	2288.17							g69373	2378.31							g12923	362.948
g60646	2287.93							adi2mcaRNA18837_R0	2375.64							g246	362.896
g22493	2286.96							g57618	2374.2							g32469	362.624
g58637	2285.69							adi2mcaRNA10685_R0	2372.95							g36060	361.876
adi2mcaRNA8493_R0	2281.87							g60886	2372.65							g478	361.83
g31419	2280.47							g32947	2369.55							g28781	361.789
g49156	2279.52							g36087	2369.25							g37579	361.368
adi2mcaRNA26115_R0	2276.93							g3594	2368.37							g11425	361.235
g45164	2276.62							adi2mcaRNA2721_R0	2365.88							g36261	361.222
g23859	2272.81							g53742	2364.74							g24090	360.951
g66114	2270.26							g62389	2362.52							adi2mcaRNA9790_R0	360.888
g69373	2269.75							g23876	2360.64							adi2mcaRNA23861_R2	360.852
g28269	2267.64							g43929	2360.51							g17948	360.837
g5038	2264.01							g27645	2358							g40316	360.648
g48489	2261.81							g25122	2357.74							g53225	360.601
g71286	2257.9							g56764	2355.55							g12941	360.073
g45577	2257.86							g28772	2355.35							g61017	359.488
g11796	2254.91							g53335	2352.91							g67855	359.089
adi2mcaRNA11640_R1	2253.27							g4636	2352.62							g41680	358.9
g11181	2252.71							g57559	2352.5							adi2mcaRNA12432_R0	358.831
g29329	2252.35							g41978	2350.23							g25594	358.522
g46410	2251.45							g33652	2347.31							g54602	357.788
g36708	2251.24							g28332	2347.22							g53791	357.669
g49976	2249.16							g46960	2344.8							g45438	357.52
g33291	2247.84							g44167	2342.61							g31223	357.169
g3806	2247.74							g67664	2340.04							g46910	356.697
g62901	2245.41							g30454	2339.9							g34787	356.662
g28767	2242.5							g58092	2339.4							g22282	356.33
adi2mcaRNA59_R0	2241.86							g24216	2337.68							g42022	356.296
g39975	2241.24							adi2mcaRNA7046_R1	2337.59							g48279	356.291
g46067	2237.98							g5044	2336.92							g26564	356.048
g3046	2236.56							g48079	2335.73							g39405	355.873
g17200	2236.28							g70003	2331.66							adi2mcaRNA10635_R0	355.724
g35260	2235.98							g33273	2331.52							g28765	354.652
adi2mcaRNA20985_R0	2235.16							g33278	2326.46							g35095	354.15
g62662	2233.32							adi2mcaRNA38630_R0	2325.76							g61008	353.838
g3408	2229.01							g28985	2324.22							adi2mcaRNA3964_R1	353.738
g28342	2223.7							g3326	2323.79							adi2mcaRNA6247_R0	353.572
g58599	2220.86							g29298	2322.19							g41902	353.043
adi2mcaRNA32510_R1	2219.13							g17420	2321.18							g48851	352.991
g27883	2217.63							g51051	2320.96							g64416	352.95
g69050	2217.06							g41455	2319.44							g48104	352.91
g28985	2211.66							g10243	2319.31							g34003	352.585
g28240	2210.95							adi2mcaRNA16049_R0	2310							g36666	352.485
g45492	2210.45							g57244	2309.97							g38789	352.265
g46358	2208.52							g58350	2306.79							g42642	352.19
g22625	2207.53							g19962	2306.62							g46915	352.002
g43845	2206.21							adi2mcaRNA32202_R1	2305.33							g1373	351.307
g17323	2204.7							g26013	2304.68							g61997	351.168
g23331	2203.17							g40744	2304.09							g34000	350.82
g32301	2200.11							g36959	2300.52							g15439	350.782
g24363	2199.77							g33293	2292.33							g53523	350.422
g64054	2198.04							g5672	2289.26							g2855	349.788
g46062	2194.46							g49976	2289.09							adi2mcaRNA12777_R0	349.754
g26421	2192.74							g49149	2283.8							g54695	349.636
g64510	2192.18							g57099	2280.8							adi2mcaRNA4454_R0	349.312
adi2mcaRNA19502_R0	2186.2							g52470	2278.96							g21910	349.239
g70470	2183.53							g48649	2277.58							g67922	349.231
g29188	2179.82							g33394	2275.5							g5224	348.902
g25172	2179.29							g10954	2275.29							g52529	348.823
adi2mcaRNA10298_R0	2179.09							adi2mcaRNA7128_R0	2270.05							g71449	348.583
g43402	2173.6							g51676	2269.19							adi2mcaRNA20392_R0	348.336
adi2mcaRNA862_R0	2172.45							g29169	2268.81							g53949	348.271
g2078	2167.4							g2720	2267.7							adi2mcaRNA16675_R0	348.209
g36005	2166.52							g16061	2267.34							g28772	347.872
g46706	2164.35							g38335	2263.86							g51279	347.863
g9756	2162.13							adi2mcaRNA27568_R0	2255.34							g34533	347.643
g25231	2161.21							g5071	2253.18							g26435	347.305
g33429	2160.7							adi2mcaRNA11905_R0	2250.02							g48108	346.805
g70308	2160.37							g62597	2247.21							g27609	346.366
g41422	2159.78							g49851	2246.62							adi2mcaRNA19080_R0	346.278
g35192	2156.31							g50933	2243.26							g59127	345.425
g29284	2154.63							adi2mcaRNA37022_R0	2241.8							g28599	344.732
g71511	2152.59							g7313	2237.95							g64070	344.57
g32246	2150.12							g27883	2235.8							g40475	344.261
g64763	2149.58							g35192	2234.3							g30303	343.976
g41455	2146.68							adi2mcaRNA8409_R0	2234.19							g34424	343.974
g39406	2145.65							g29390	2233.17							g32291	343.761
g25414	2142.68							adi2mcaRNA35786_R0	2232.73							g48503	343.577
g12822	2142.49							g16049	2231.28							g7950	343.431
g43929	2139.65							g15544	2230.83							g24972	343.406
g63377	2138.78							g44547	2226.73							g33696	342.286
g17213	2137.37							g54281	2224.94							g22579	341.907
g3594	2136.9							g7742	2224.75							g2160	341.849
g35471	2133.38							g40954	2223.93							g41491	341.411
g36722	2128.67							g39423	2223.04							g59982	341.333
g40434	2124.56							g27727	2220.74							g62659	341.261
g33464	2122.66							g45536	2220.07							g17775	340.243
g36087	2121.39							g4741	2219.92							g48521	340.09
g67849	2120.06							g57619	2217.37							g51668	339.66
g31002	2120.05							g47761	2216.7							g38208	338.543
g51634	2117.25							g40913	2207.53							g28175	338.15
g47410	2114.24							g50546	2204.15							g19962	337.545
g41481	2113.78							g32951	2203.56							g21621	337.298
g33950	2110.67							g39926	2199.62							g36889	337.275
g46960	2108.85							g58637	2196.78							g45328	336.647
g32108	2108.57							g42433	2196.14							g40659	336.23
g56485	2107.76							g33545	2196.09							g26334	335.64
g27900	2106.73							g31881	2195.39							g55709	335.482
g43279	2104.18							g42331	2190.31							g32148	335.117
g3326	2095.1							g9281	2189.73							g25016	334.623
adi2mcaRNA39678_R0	2094.41							g33593	2188.39							g3537	334.347
g15179	2093.57							g27621	2187.81							g54191	334.311
g26307	2093.19							g43032	2178.66							g35488	334.105
g33618	2089.3							g45342	2174.22							g22483	333.932
g7874	2088.64							g25123	2170.86							g25712	333.777
g68549	2088.39							g8631	2169.23							g24255	333.474
g53761	2088.1							g17323	2167.03							g45443	332.849
g40326	2084.49							g64426	2166.76							g54944	332.5
g53883	2083.84							g48105	2166.41							g36704	332.285
g50735	2081.81							g43398	2166.37							g60990	332.262
g21700	2081.05							g50735	2165.52							g58088	332.224
adi2mcaRNA29018_R0	2080.46							g18170	2162.45							g46970	332.198
g24972	2078.49							g22628	2161.07							g67149	332.021
g58598	2078.02							g2233	2156.42							g16306	331.63
g53607	2078.01							g6542	2155.17							g60992	331.207
g46558	2077.84							g57621	2154.83							g5457	331.143
g66570	2076.87							g40434	2153.85							g32651	330.969
g42811	2075.78							g61120	2150.36							adi2mcaRNA24841_R0	330.586
adi2mcaRNA6682_R0	2075.66							g64088	2145							g69323	330.189
g6542	2074.68							adi2mcaRNA29576_R0	2144.18							g49482	330.177
g71157	2070.55							g57304	2143.1							g21693	330.042
g14552	2070.22							g61001	2140.07							adi2mcaRNA32466_R1	329.917
g54034	2069.89							g32329	2139.42							g41776	329.849
g57216	2066.68							g25232	2138.86							g69705	329.82
g36994	2065.99							adi2mcaRNA27153_R0	2136.85							g27255	329.455
g5580	2065.61							g16638	2135.14							g56364	329.364
g57150	2058.68							g53769	2134.38							g63602	329.087
g61953	2058.11							adi2mcaRNA32910_R5	2133.34							g30463	328.509
g44167	2056.81							g50734	2132.18							g39681	328.474
g70471	2054.66							g66694	2130.64							g51640	328.348
g9729	2053.5							g63378	2130.44							g25683	328.011
g3329	2053.09							g49624	2128.96							g49868	327.959
g37488	2051.17							g35957	2128.93							g1361	327.848
adi2mcaRNA23326_R0	2049.4							g60873	2127.67							g475	327.452
g27162	2048.3							g69045	2125.32							g56979	327.106
g56373	2046.4							g41481	2123.58							g28636	327.075
g12057	2044.48							g64086	2120.47							g31726	327.046
g25659	2041.75							g53880	2115.62							g44188	326.505
g40659	2040.37							g39762	2115.51							g31697	326.316
adi2mcaRNA39690_R0	2039.87							g33873	2114.51							g32300	326.078
g45536	2036.64							g19663	2112.34							g25517	326.074
g33598	2036.47							g70331	2111.81							g57149	325.889
g10243	2034.12							adi2mcaRNA2251_R2	2106.26							g27860	325.727
g35915	2031.23							g3897	2104.22							g28011	325.084
g27887	2031.2							adi2mcaRNA20515_R0	2102.56							g52544	324.958
g64759	2030.41							g50891	2101.97							g41732	324.556
adi2mcaRNA31040_R0	2029.56							g25172	2099.46							g49864	324.441
g38661	2019.81							g27559	2098.6							g33724	324.19
g33290	2017.12							g22498	2095.71							g51187	324.029
g33866	2016.97							g58334	2090							g12934	324.01
g4335	2016.18							g65819	2089.34							g53469	323.577
g52458	2014.14							g67295	2089.29							g33836	323.449
g33596	2013.05							g38396	2088.79							adi2mcaRNA4380_R0	323.2
g31789	2008.7							g41973	2087.76							g49301	323.001
g1263	2007.73							adi2mcaRNA5620_R0	2086.33							g58090	322.132
g52054	2006.76							adi2mcaRNA24276_R0	2083.68							g58350	320.94
g14597	2004.38							g27922	2081.89							g67242	320.833
g32947	2002.09							g60194	2081.37							g10954	320.755
g35940	2000.83							g41344	2079.01							g31183	320.401
g49199	2000.77							adi2mcaRNA26974_R3	2077.56							g28292	320.212
g1923	1998.48							g63273	2076.05							g27734	320.07
g5230	1994.51							g41333	2074.59							g37230	320.032
g52728	1993.49							g57306	2073.62							adi2mcaRNA6092_R0	319.915
g42411	1987.04							g43720	2070.38							g16174	319.778
g64471	1985.09							g29875	2067.62							g14871	319.564
g48521	1982.29							adi2mcaRNA10298_R0	2065.98							g69462	319.49
g24060	1982.22							g57801	2065.35							g55133	319.485
g10948	1977.93							g55922	2063.63							g32265	319.307
g57559	1974.52							g9579	2055.37							g63777	318.995
g23891	1970.1							adi2mcaRNA10369_R0	2054.65							adi2mcaRNA6110_R0	318.408
g70018	1969.18							g51328	2051.79							g4181	318.388
g58638	1965.23							g3806	2051.42							g33184	317.984
g5373	1964.31							g33962	2048.87							g41455	317.872
g69804	1964.18							g9829	2048.32							g34636	317.738
g49139	1963.28							g48846	2045.68							g26880	317.724
g2152	1963.08							adi2mcaRNA10614_R0	2043.83							g45772	316.857
g7316	1961.18							g46458	2041.24							g66178	316.77
g36739	1960.35							g27646	2040.87							g30600	316.709
g67828	1960.33							g26564	2036.95							adi2mcaRNA9599_R0	316.69
g4256	1960.09							g47492	2035.31							g44839	316.658
g32012	1959.62							g33616	2034.11							g39631	316.65
g10598	1959.36							adi2mcaRNA4390_R0	2032.41							g70625	316.623
g70732	1958.37							g56373	2032.08							g30090	316.291
g5044	1956.6							g67903	2029.33							g53744	315.932
g58439	1955.64							g27045	2026.04							g23814	315.926
g55922	1952.81							g21642	2025.72							g48217	315.804
g45329	1952.7							g9832	2025.41							g22754	315.678
g41333	1948.9							adi2mcaRNA10800_R0	2024.92							adi2mcaRNA14986_R0	315.667
g26303	1948.81							g30301	2023.17							g12080	315.642
g12286	1946.88							g15179	2020.25							g17201	315.474
g5052	1946.82							adi2mcaRNA35177_R0	2017.38							g46430	315.33
adi2mcaRNA28113_R0	1942.2							g63045	2015.17							adi2mcaRNA29133_R0	315.195
adi2mcaRNA2033_R0	1937.39							g42215	2015.07							g4	315.191
g70003	1935.5							g201	2013.84							g28868	315.005
g21904	1934.76							g25539	2012.43							g17073	314.99
adi2mcaRNA25068_R0	1929.87							g24982	2011.55							g35993	314.814
g49851	1927.72							g53637	2011.21							g29329	314.543
g53337	1927.56							g35940	2008.39							g62603	314.355
adi2mcaRNA25523_R0	1926.6							g21904	2008							g43715	314.276
g35357	1926.02							g41334	2006.71							g50474	314.162
g6785	1925.51							g53337	2004.44							g28626	313.968
adi2mcaRNA13751_R0	1925.49							g60916	2003.06							g28265	313.909
g58338	1925							g46430	2002.93							g38329	313.387
g45330	1924.52							g66566	2002.41							g17178	313.356
g46437	1922.32							g9382	1999.57							g67736	313.206
g66566	1916.33							g46062	1996.7							g1359	312.978
g67172	1914.43							g19264	1993.8							g18030	312.397
g56372	1913.96							g58503	1991.17							g55917	312.39
g68025	1912.37							g24101	1988.55							g65427	312.272
g45342	1910.71							g12822	1984.14							g62390	311.992
g37649	1908.53							g62852	1979.39							g55711	311.918
g15708	1904.24							g56732	1976.3							g37057	311.909
g68152	1900.06							g9930	1976.07							g11101	311.637
g58391	1899.43							g25423	1974.76							g21696	311.528
g61994	1895.35							g33870	1974.25							g58548	311.486
g36720	1890.82							g32811	1972.3							g44169	311.455
g32447	1889.86							g32754	1971.39							g32054	310.831
g30050	1889.09							g42305	1969.57							adi2mcaRNA18560_R1	310.825
g46340	1887.96							g46067	1968.39							g2296	310.713
g45264	1884.25							g3794	1968.16							g25191	310.461
g1499	1883.04							g10405	1967.38							g34633	310.059
g52666	1881.89							g48689	1967.36							g30188	309.828
g7313	1880.96							g30461	1963.26							g66919	309.811
g71349	1879.65							g29948	1962.14							g41344	309.749
g56987	1879.55							g24144	1960.13							g32336	309.273
g38345	1878.82							g55528	1960.05							g37345	308.766
g26515	1872.85							g26278	1959.43							adi2mcaRNA40167_R0	308.73
g45309	1871.66							g32463	1959.42							g68204	308.686
g27621	1871.21							g5391	1957.96							g29410	308.478
g21755	1870.57							g39975	1956.03							g67362	308.461
g22530	1869.09							g45164	1953.08							g25267	308.362
g38210	1867.32							g56372	1948.6							g70883	308.23
g3428	1866.88							g57117	1947.95							g68164	307.774
g33962	1865.32							g1829	1947.26							g35444	307.437
g41764	1863.61							g29284	1946.79							g28024	307.26
g50798	1863.46							g68341	1944.59							g41244	306.693
g32889	1860.77							g9756	1941.89							g41941	306.691
g26422	1860.25							g8024	1939.13							adi2mcaRNA27705_R0	306.536
g63260	1858.4							g37649	1936.12							g51150	306.399
g36894	1857.46							g37220	1935.71							g54237	306.263
g29776	1855.95							g13202	1932.05							g54981	305.23
g17137	1854.26							g44606	1931.15							g3956	305.059
g28772	1847.27							g41732	1929.76							g32243	304.951
g7066	1846.34							g5052	1926.64							adi2mcaRNA13035_R0	304.822
g43048	1845.22							g48582	1926.2							g50609	304.512
g56341	1843.73							g67241	1925.29							g36088	304.344
g23101	1842.44							g29392	1922.54							g60997	304.269
g28766	1841.99							g53761	1920.24							g612	303.976
g30454	1839.36							g45219	1919.7							g28241	303.881
g35549	1838.54							g36421	1915.42							g56099	303.871
g28175	1832.55							g34878	1914.92							g35957	303.805
g23132	1830.76							g66769	1914.62							adi2mcaRNA26720_R3	303.637
g41283	1830.73							g50738	1913.72							g62004	303.551
g10610	1830.16							g71542	1913.04							g25268	303.486
g53996	1828.77							g24979	1912.05							g68207	303.195
g28265	1827.6							g45309	1910.33							g45179	303.167
g51051	1826.66							g16604	1909.85							g8632	302.747
adi2mcaRNA3526_R0	1825.96							g28800	1905.21							g45707	302.701
adi2mcaRNA16004_R0	1825.58							g54961	1905.02							g28274	302.631
g48618	1824.26							g36722	1904.03							adi2mcaRNA26390_R3	302.499
g48649	1822.36							g28767	1903.83							g63038	302.297
g24027	1821.19							g30302	1899.02							g35898	302.069
g34639	1821.17							g5373	1897.26							g22396	302.055
g21669	1819.95							g36994	1894.69							g70470	301.662
g54289	1819.42							g42003	1892.53							g63044	301.591
g1359	1818.57							g33944	1892.44							g4000	301.49
g50755	1815.54							g25484	1890.74							g49071	301.428
g6446	1815.2							g42409	1889.4							g68341	301.146
adi2mcaRNA23243_R0	1809.36							g8145	1888.08							g31329	301.144
g25232	1808.89							g251	1885.41							g3667	301.034
g36085	1805.25							g42411	1885.19							adi2mcaRNA3019_R0	300.454
g42333	1799.18							g46902	1884.74							g25068	300.287
adi2mcaRNA33016_R1	1798.42							g33338	1883.54							g1924	300.195
g28991	1796.91							g69999	1881.57							g22350	300.109
g60214	1796.32							g48388	1880.67							g3539	299.436
g6303	1794.87							g49301	1880.43							g71360	298.993
g27540	1792.44							g28269	1879.72							g66180	298.858
g61127	1792.32							g21640	1877.36							g1397	298.528
g62840	1790.36							g39719	1876.28							g31917	298.378
g47761	1783.83							g55635	1873.65							g27873	298.149
g48645	1782.02							g4392	1873.31							g26310	298.1
g45313	1781.12							g51181	1873.2							g30171	297.871
g37530	1778.29							g12057	1873.12							g30482	297.821
g9769	1777.29							g38092	1871.59							g24201	297.756
g39926	1776.1							g9356	1870.22							g43322	297.642
g33593	1773.88							g21186	1868.93							g11358	297.365
g43733	1770.81							g71007	1868.12							g37835	296.698
g46430	1769.23							g46349	1867.76							g31440	296.64
g43515	1768.35							g4178	1866.4							g34417	296.164
adi2mcaRNA3193_R1	1767.13							g38329	1865.57							g17546	295.858
g18522	1766.3							g23838	1860.71							g19061	295.726
g56218	1757.18							g45823	1860.03							g26278	295.677
g39870	1757.03							g69630	1858.99							g22389	295.342
g30578	1756.86							g33658	1857.52							g71046	294.952
adi2mcaRNA35487_R0	1756.63							g45264	1857.09							g27162	294.803
g57621	1756.51							g40780	1856.56							g47489	294.746
g13439	1755.07							g49870	1855.79							adi2mcaRNA30750_R0	294.515
g64087	1752.01							g48246	1851.53							adi2mcaRNA9821_R0	294.41
g31222	1749.8							g37344	1848.66							g71191	294.142
g47492	1748.87							g32447	1847.88							g39404	293.836
g45219	1746.47							g41768	1846.88							g62006	293.719
g23463	1744.23							g22278	1843.42							g31191	293.658
g70022	1744.23							g24363	1842.77							g27146	293.626
g4178	1741.91							g15439	1840.06							g63102	293.513
g24216	1741.5							g22544	1839.77							g28915	293.254
adi2mcaRNA16708_R0	1740.32							g70519	1839.27							adi2mcaRNA5014_R0	293.248
g15155	1740.16							g71273	1836.73							g39266	293.021
g32041	1737.74							g52743	1836.27							g43815	292.918
g70623	1737.15							g35004	1835.66							g55652	292.853
g52471	1733.27							g70881	1829.71							g23811	292.85
g34629	1732.56							g23836	1827.7							g28498	292.617
g10108	1731.88							adi2mcaRNA24656_R0	1827.59							g69360	292.54
g67241	1731.04							adi2mcaRNA27224_R0	1823.15							g62786	292.401
g57645	1729.88							g35318	1817.21							g31470	292.38
g5046	1728.14							g12782	1814.01							g11234	292.253
g54257	1727.47							g68549	1812.65							g56201	291.859
g62727	1725.96							g25231	1812.32							g60387	291.849
g62004	1725.45							g67362	1811.45							g33743	291.846
g17502	1725.42							g67828	1810.93							g21750	291.573
adi2mcaRNA24276_R0	1725.02							g69499	1810.41							g62271	291.311
g48055	1724.15							g54241	1810.13							g27553	291.237
g56977	1723.09							g37040	1809.19							g66934	290.589
adi2mcaRNA26115_R4	1719.67							g60355	1803.62							g1263	290.489
g29392	1716.98							g26422	1803.02							g37587	290.287
g61001	1715.93							adi2mcaRNA23838_R0	1802.2							g15708	289.988
g25094	1714.9							g58310	1801.23							g5324	289.695
g62602	1714.75							g58190	1800.11							g46367	289.569
g50608	1713.81							g46340	1799.91							g6327	289.283
g58487	1710.75							g41902	1799.2							g39141	289.237
g27559	1710.67							g17200	1798.92							g27155	289.134
g62726	1709.68							g4656	1798.5							g55718	289.126
g70881	1706.68							g32057	1794.07							g18729	288.877
g3043	1705.51							g44689	1793.7							g32408	288.736
g66731	1705.4							g54279	1791.36							g55031	288.522
g22544	1704.03							g35279	1790.96							g58638	288.298
g2033	1702.94							g21648	1789.43							g32301	287.865
g71542	1702.8							g3898	1789.16							g38294	287.833
g57619	1702.51							g55138	1788.17							g32290	287.372
g49932	1702.49							g35185	1787.54							g7930	287.358
g25398	1701.6							g53887	1787.48							g46960	287.343
g43428	1701.06							g58398	1787.1							adi2mcaRNA23087_R0	287.177
g6669	1696.58							g30578	1786.67							g58442	286.973
adi2mcaRNA1815_R0	1695.19							g51635	1786.47							g7043	286.782
g24989	1694.73							g9823	1784.63							g25593	286.35
g47572	1694.44							g23892	1783.92							g71380	286.346
g49656	1693.6							g5372	1783							adi2mcaRNA3334_R0	286.329
adi2mcaRNA7495_R0	1693.13							g55130	1782.22							g28625	286.271
g30019	1688.6							g49139	1778.7							g35195	285.957
g65506	1687.86							g20727	1777.55							g54783	285.896
g51668	1686.27							g27123	1777.28							g21700	285.812
g39692	1686.03							g16872	1776.97							g22335	285.178
adi2mcaRNA1443_R0	1684.14							g54026	1775.67							g32242	285.071
g16387	1682.33							g15708	1775.13							g68025	284.652
g53880	1678.52							g30184	1773.94							g25802	284.62
g32409	1676.96							g5053	1771.08							g32498	284.437
g36959	1676.56							g49855	1770.4							g44133	284.355
g4650	1675.99							g23855	1769.62							g26445	284.279
g41244	1673.95							g5038	1769.57							g32947	284.092
g70334	1673.55							g2532	1769.11							g55698	283.989
g49150	1671.67							g43165	1768.48							g71381	283.953
g14932	1669.02							g30192	1766.32							g50734	283.871
g33169	1668.24							g62602	1762.25							g46700	283.793
g1764	1667.36							g10186	1758.24							adi2mcaRNA11423_R2	283.418
g36261	1665.05							g28177	1756.88							adi2mcaRNA2034_R0	283.373
g61013	1663.27							g25680	1755.89							g26001	283.303
g35279	1662							g31754	1755.08							g67745	283.109
g55324	1660.96							g51640	1754.41							g58092	283.001
g31996	1660.71							g32298	1751.28							g4144	282.937
g33938	1660.61							g7549	1751.27							g50755	282.567
g71007	1659.67							g27162	1751.2							g22530	282.497
g41227	1659.46							adi2mcaRNA8635_R0	1746.98							g18170	282.359
g11963	1659.23							g17676	1746.41							g43941	282.317
g35939	1658.24							g6368	1745.66							g35956	282.262
g40954	1658.21							g35198	1745.36							g11682	282.256
g67243	1657.87							g33837	1740.34							g51690	282.209
g9579	1657.52							g57150	1737.93							g45153	282.206
g25230	1656.81							g43281	1737.34							g54338	282.15
g26491	1656.34							g24027	1736.47							g23899	282.103
g4707	1655.67							g14262	1735.55							g16482	281.821
g9254	1654.44							adi2mcaRNA32162_R5	1734.73							g42332	281.728
g54326	1650.59							g22424	1734.19							g47459	281.609
g40444	1648.16							g35337	1732.5							g52435	281.379
g36022	1646.57							g2600	1731.67							g52082	281.304
g41670	1646.46							g14939	1729.52							g40446	281.142
g50450	1645.74							g28175	1729.13							g55528	280.988
g36451	1644.93							g9290	1728.88							g34433	280.513
g42409	1643.96							g3962	1727.83							g36012	279.561
g27129	1643.18							adi2mcaRNA27676_R0	1726.66							g28159	279.532
g31430	1641.71							g23860	1724.82							g41209	279.499
g46686	1638.5							g68728	1720.62							g63809	279.006
g52590	1635.77							g33866	1717.95							g53465	278.759
g35249	1634.94							g45775	1717.22							g45144	278.738
g60347	1634.76							g26515	1714.23							g41742	278.535
g65485	1631.98							g228	1712.03							adi2mcaRNA36379_R0	278.326
g2555	1631.78							g36708	1709.46							g35193	278.051
g27922	1631.15							g44693	1706.94							g26544	277.938
g251	1630.56							g33618	1704.48							g25410	277.675
g1945	1630.32							g52666	1703.11							g70331	277.585
adi2mcaRNA31556_R0	1630.3							g43157	1699.87							g57527	277.537
g68728	1628.25							adi2mcaRNA2036_R0	1699.26							g49491	277.491
g69461	1627.55							g58638	1695.79							g64262	277.359
g43720	1627.05							g36183	1694.24							g29122	277.321
g16572	1626.56							g34001	1691.36							g56764	277.314
g3778	1625.3							g49643	1691.11							g33950	277.304
g8820	1621.25							g32293	1690.92							g46202	277.242
g40317	1613.62							g2555	1690.34							g26836	277.211
g53758	1613.6							g37994	1689.76							g26870	277.095
adi2mcaRNA4390_R0	1612.73							g25659	1686.47							g33976	276.88
g56891	1611.93							g51105	1686.26							g22542	276.867
g27123	1609.99							g1926	1681.23							g34972	276.851
g32463	1607.93							g9260	1679.88							g35318	276.795
g54907	1606.56							g22625	1679.1							g37493	276.481
g60355	1606.4							g59540	1678.82							g17642	276.416
g65427	1606.21							g67172	1678.48							g64763	276.38
g45310	1605							g33938	1677.91							g32313	275.938
g33996	1604.66							g36060	1677.71							g45218	275.797
g35440	1603.16							g48055	1677.36							g29575	275.687
adi2mcaRNA31485_R0	1601.66							g2701	1676.66							g65073	275.299
g62140	1598.63							g32041	1674.19							g42410	275.037
g33294	1598.1							g41114	1669.11							g48266	274.863
adi2mcaRNA35786_R0	1597.7							g38345	1668.36							g33919	274.761
g6735	1597.28							g33544	1667.67							g46694	274.69
g8024	1596.8							g29269	1664.04							g46366	274.637
adi2mcaRNA20827_R1	1594.24							g22963	1662.56							g4659	274.583
g57244	1591.07							g4650	1660.27							g36825	274.555
g29269	1584.9							g22531	1652.7							g28008	274.284
g33604	1584.73							g31789	1652.21							g32700	274.148
g56099	1584.57							g45308	1651.65							g63023	273.974
adi2mcaRNA1343_R0	1584.46							g36663	1650.14							g64069	273.838
g38717	1583.43							g56218	1649.87							g33464	273.785
g1926	1582.09							g23132	1649.24							g47444	273.705
g48542	1581.43							g6669	1644.38							g34629	273.146
adi2mcaRNA12641_R0	1581.01							g32409	1643.81							g40324	273.069
g60888	1578.78							g1922	1640.02							adi2mcaRNA10691_R3	272.794
g56274	1576.77							g24057	1639.91							adi2mcaRNA33021_R0	272.519
g32374	1573.94							g61127	1639.19							g5907	272.422
g14106	1570.95							g37684	1639.07							g62274	272.289
g34496	1569.5							g25414	1638.6							g51654	272.004
g36311	1568.63							g26869	1638.52							adi2mcaRNA578_R0	271.723
g4656	1567.7							g29205	1637.36							g32060	271.713
g62852	1566.04							g48819	1633.76							adi2mcaRNA10296_R0	271.587
adi2mcaRNA21959_R0	1566.02							g45577	1633.11							g25504	271.362
g24979	1565.37							g5326	1630.24							g60063	271.01
g51185	1560.25							g67111	1630.1							g41798	270.945
g35322	1558.87							adi2mcaRNA29020_R0	1629.8							g25071	270.869
g39423	1556.95							g27335	1627.21							g45079	270.447
adi2mcaRNA12375_R0	1554.79							g28086	1624.44							g37900	270.206
g46344	1552.94							g33290	1620.07							g59124	270.134
g28086	1551.68							g58186	1619.1							g1945	269.971
g29390	1551.61							g50381	1618.95							g35274	269.957
g33227	1551.06							g7286	1618.84							g46424	269.823
g61989	1549.57							g2188	1617.38							g22570	269.698
g9960	1547.57							g69811	1615.51							g53335	269.644
g14885	1544.59							g34599	1615.1							g62259	269.425
g17782	1544.17							adi2mcaRNA18217_R0	1614.27							g4721	269.406
g2792	1543.86							g9776	1610.75							adi2mcaRNA21801_R0	269.073
g68752	1543.16							g22622	1608.35							g16492	268.933
g67439	1541.94							g27887	1604.75							g35505	268.817
g50932	1541.46							g35072	1603.6							g61709	268.814
g10186	1539.52							adi2mcaRNA1589_R9	1602.9							g52209	268.728
g7713	1538.63							g7121	1601.9							g15944	268.646
g23813	1537.96							g5580	1601.24							g25993	268.416
g37038	1533.85							g40318	1599.95							g70897	268.308
g2055	1533.48							g34629	1598.9							adi2mcaRNA26927_R0	268.258
g21642	1532.25							g60367	1595.69							g6789	268.137
g62437	1531.74							g38252	1595.09							g43402	267.786
g58494	1531.46							g31419	1594.09							g46346	267.4
g66694	1530.8							g71349	1592.54							g22676	267.268
g59496	1528.78							g70701	1590.61							g67734	267.2
g22628	1528.63							g48085	1590.52							g23876	267.068
g50930	1527.44							g49168	1587.97							g25503	267.055
g57524	1526.32							g35010	1587.9							g38396	266.852
g36663	1525.68							g33198	1586.99							g38376	266.773
adi2mcaRNA27153_R0	1522.94							g25230	1585.66							adi2mcaRNA20544_R0	266.501
g54038	1522.85							g56341	1584.9							g6444	266.168
g22622	1521.54							g17904	1582.78							g67446	266.132
g32939	1521.12							g10948	1579.17							g45152	266.112
g17648	1518.85							g32435	1578.29							g64286	266.031
g3956	1518.7							g53883	1577.48							g29587	265.429
g30149	1514.98							g54252	1577.29							adi2mcaRNA33119_R0	265.404
g32521	1514.5							g21675	1577.17							g45282	265.348
adi2mcaRNA33021_R0	1514.08							g67646	1577.14							g50786	265.332
g44693	1513.26							g13828	1574.65							g65825	265.14
adi2mcaRNA716_R0	1512.9							g36766	1573.79							g47697	264.951
g8981	1512.63							g56987	1573.55							g47224	264.891
g41973	1512.53							g11181	1573.14							g6673	264.722
g34619	1511.24							g64474	1572.62							g35152	264.638
g22834	1510.65							g29895	1572.33							g67172	264.484
g22963	1509.96							g49628	1568.32							g32108	264.435
g56370	1509.54							g42333	1566.28							g36992	264.404
g47766	1508.14							g21669	1564.42							g19487	264.207
g64062	1507.83							g5008	1563.5							g39399	264.031
g34636	1504.46							g9062	1562.54							g63838	263.991
g49953	1503.67							adi2mcaRNA19095_R0	1560.77							g30641	263.964
g25678	1502.8							g71511	1560.58							g46330	263.847
adi2mcaRNA11905_R0	1502.39							g26427	1557.88							g58358	263.801
g31886	1498.85							adi2mcaRNA19502_R0	1556.92							g39413	263.761
g43731	1498.27							adi2mcaRNA13035_R0	1554.98							adi2mcaRNA10754_R1	263.754
g49628	1497.77							g46437	1554.51							g35260	263.44
g61673	1497.22							g55197	1554.4							g42405	263.438
g45743	1495.83							g43257	1553.6							g34157	263.336
g36305	1495.58							g42613	1553.31							g54400	263.043
g9356	1495.21							g22484	1553.08							g66257	262.931
g12442	1493.61							g45509	1552.65							g60642	262.742
g33273	1493.18							g24406	1551.33							g49291	262.678
g21640	1489.23							g25138	1549.86							g35108	262.604
g44888	1487.84							g43173	1549.62							g5053	262.565
g22433	1484.63							g53996	1549.27							g33957	262.557
g41048	1484.46							g34645	1547.92							g55166	262.247
g45343	1483.98							g68752	1547.21							g46333	262.188
g28024	1483.08							g31402	1545.23							adi2mcaRNA7495_R0	262.036
g60452	1482.92							g3080	1544.52							g25994	261.942
g41353	1475.68							g62901	1544.5							g22529	261.903
g69492	1475.24							g46731	1544.42							g36276	261.87
g9930	1474.28							adi2mcaRNA30490_R0	1544.41							g25230	261.802
g61598	1474.07							g69459	1543.53							g48071	261.589
g48079	1471.76							g58947	1541.95							g48663	261.39
g3080	1470.9							g28766	1539.62							g17441	261.376
g48582	1470.83							g43301	1539.52							adi2mcaRNA8493_R0	261.118
g41114	1470.17							adi2mcaRNA29285_R1	1536.89							g69867	260.998
adi2mcaRNA8500_R0	1468.3							g51123	1535.67							g35953	260.936
g37213	1467.21							g16387	1534.42							g22366	260.861
g46627	1466.75							g41244	1532.85							g37692	260.747
g22278	1464.46							adi2mcaRNA33384_R0	1532.7							g25038	260.675
g41675	1462.76							g67439	1532.42							g23209	260.507
g64086	1461.69							g5222	1531.11							g33291	260.307
adi2mcaRNA8962_R0	1460.57							g29776	1529.17							g31708	260.024
g42829	1458.88							g35872	1529.08							adi2mcaRNA18213_R0	259.981
g60698	1458.34							g69515	1528.25							g5008	259.832
adi2mcaRNA10800_R0	1458.1							g65485	1527.7							g40304	259.496
g3794	1456.84							adi2mcaRNA39678_R0	1527.49							g52086	259.496
adi2mcaRNA432_R0	1455.87							g62768	1527.37							g35043	259.292
g39404	1454.7							g54257	1526.84							g43521	259.281
g26427	1454.42							g49299	1526.12							adi2mcaRNA132_R0	259.194
g53583	1454.29							g35111	1522.22							adi2mcaRNA7128_R0	259.166
g32057	1448.72							g7783	1521.39							g67454	259.141
g60497	1448.68							g24291	1521.03							g32312	259.106
g45308	1448.57							g69868	1520.98							g51733	259.024
g39875	1447.75							g25678	1519.35							g25488	259.004
g60194	1447.58							g68025	1518.16							g15440	258.887
g16304	1445.46							g58864	1517.59							g7193	258.882
g27640	1442.8							g45330	1516.16							g23849	258.576
g47549	1442.71							g16098	1515.87							g71130	258.465
g32751	1440.31							g71157	1514.4							g54285	258.458
g57304	1438.95							g70308	1514.17							g31765	258.43
g30192	1438.33							g3043	1514							g48689	258.38
g43928	1438.33							g25676	1513.62							g45509	258.176
g44563	1435.53							g54778	1510.55							g27898	258.065
g70558	1434.08							g60214	1510.23							g55150	258.054
g52112	1432.1							g34444	1510.19							g43101	258.017
g537	1429.84							g11592	1508.78							g37833	257.794
g70598	1427.74							g25062	1506.85							g51845	257.675
g70993	1427.7							g60497	1504.82							g35436	257.454
g40341	1427.06							g36451	1504.49							g25231	257.398
g21716	1426.71							g67846	1503.8							g45492	256.854
g35318	1425.5							g26410	1502.75							g35988	256.807
g61988	1425.18							g56370	1501.69							g30191	256.762
g46753	1424.71							g14597	1501.04							g68149	256.25
g45489	1424.05							g25061	1499.99							g21325	256.19
g24057	1422.68							g35149	1499.27							g39689	256.155
g53786	1422.25							g2187	1498.89							g364	256.076
g11939	1420.93							g42810	1496.48							g52835	256.007
g23876	1418.82							g33395	1496.29							g4238	255.961
g48819	1417.75							g14106	1495.9							g1276	255.927
g60885	1416.88							g49310	1495.87							g54733	255.922
g33875	1416.14							adi2mcaRNA23004_R0	1494.81							g5125	255.806
g34421	1415							g34637	1493.24							g34425	255.78
g60906	1414.72							g53583	1489.92							g70716	255.648
adi2mcaRNA1589_R9	1413.94							g37952	1489.69							g32246	255.608
adi2mcaRNA23639_R0	1413.24							g33795	1489.23							g1923	255.417
g41334	1410.73							g26307	1488.91							g52064	255.129
g22424	1408.6							g35962	1488.9							g25246	255.122
g12943	1407.83							g27644	1488.17							g55919	255.092
g29879	1406.38							g60347	1487.42							g58590	254.642
g24099	1404.4							g30967	1486.97							adi2mcaRNA24402_R0	253.887
g8358	1403.59							g29301	1486.61							g40981	253.81
g35483	1400.6							g31002	1483.47							g23303	253.62
g42332	1396.47							g69003	1482.12							g67455	253.478
g38329	1394.76							g41453	1481.95							g55343	253.167
g40744	1394.62							g22493	1481.51							g32754	252.862
g3897	1394.46							g64062	1478.82							g60906	252.79
g49919	1394.16							g55709	1477.57							g48823	252.773
g44683	1393.73							g47025	1474.61							g23161	252.635
g57511	1392.24							g58598	1472.52							g33429	252.54
g44798	1391.41							g35278	1471.76							g55774	252.36
g17816	1389.67							g68938	1471.67							g71334	252.357
g37952	1389.25							g31222	1470.77							g32702	252.336
g70701	1388.24							adi2mcaRNA11640_R1	1470.68							g62783	252.183
g54944	1386.36							g68838	1467.13							g32450	252.149
g27612	1385.79							g54931	1465.96							g57307	251.898
g51640	1384.84							g53587	1465.89							g38327	251.81
g32297	1383.51							g57216	1464.97							g52054	251.697
g40429	1381.44							g58596	1463.97							g22493	251.663
adi2mcaRNA24388_R0	1380.19							g67110	1461.8							g48585	251.643
g32239	1379.87							g31996	1460.04							g46898	251.419
adi2mcaRNA2251_R2	1379.34							g22277	1458.85							g47470	251.235
g22805	1378.95							g38210	1457.69							g29951	250.967
g57515	1377.51							g2996	1457.61							adi2mcaRNA2223_R0	250.949
g44634	1376.75							g3778	1457.26							g24027	250.895
g40421	1375.33							g47572	1457.18							g27229	250.517
g2086	1374.32							g25489	1456.81							g22554	250.422
g17069	1371.97							adi2mcaRNA24725_R0	1456.72							g36881	250.412
g49299	1371.84							g70022	1456.38							g43436	250.365
g47589	1371.37							adi2mcaRNA10443_R0	1454.76							g46893	250.25
g29927	1370.64							g31854	1454.39							g48105	250.166
g9820	1368.47							adi2mcaRNA33643_R1	1453.72							g22662	250.136
g67111	1368.13							g26421	1452.58							g44164	249.863
adi2mcaRNA29147_R0	1366.82							g55965	1449.6							g32954	249.863
g36735	1365.24							g36917	1447.15							g70002	249.845
g58053	1362.58							g36523	1446.7							g33207	249.817
g38335	1362.23							g23942	1446.2							g47748	249.813
adi2mcaRNA24656_R0	1362.21							g22489	1441.91							g70476	249.644
adi2mcaRNA12344_R0	1361.93							g33996	1441.8							g7357	249.449
g48083	1361.39							g32465	1439.93							g61101	249.179
adi2mcaRNA36509_R0	1360.56							adi2mcaRNA16801_R0	1439.9							g25121	249.027
g32435	1360.36							g21657	1439.32							g7328	249.009
g28242	1360.31							adi2mcaRNA23946_R1	1437.63							g54247	248.329
adi2mcaRNA32162_R5	1360.25							g46627	1436.65							g9978	248.304
g28479	1360.01							g6324	1436.28							adi2mcaRNA39918_R1	248.216
g23055	1358.54							g46293	1435.2							g64803	248.027
g50733	1358.47							g57645	1435.15							g28903	247.409
g29298	1358.11							g45464	1434.58							g27867	247.208
g25065	1356.86							g49973	1433.95							g67047	247.195
g62768	1356.17							g41283	1433.4							g31302	247.111
g56221	1356.03							g71608	1433.24							g25017	247.007
g19485	1355.83							g43271	1430.57							g66553	246.962
g43281	1354.11							g53496	1428.24							g5328	246.603
adi2mcaRNA18654_R0	1353.09							g537	1426.74							g22470	246.517
g55847	1352.2							g56977	1423.9							g26238	246.475
g11101	1352.08							g60698	1423.75							g54486	246.346
g21675	1351.74							g48286	1422.86							g4368	246.275
g60153	1351.67							g46558	1422.7							g58621	245.79
g20727	1350.44							g23893	1421.75							g46407	245.702
g61016	1349.36							g24271	1420.59							adi2mcaRNA6819_R1	245.688
g42292	1347.68							adi2mcaRNA3062_R0	1420.4							g23954	245.617
g24143	1347							g33569	1418.98							g2300	245.536
g27732	1345.76							g69804	1418.94							g50849	245.322
g58141	1345.75							g60689	1418.92							g51722	245.226
g15355	1345.07							g28991	1418.86							g40425	245.057
g41453	1343.89							g41227	1417.47							g45682	244.858
g9398	1342.29							g33605	1416.59							g6317	244.834
g58377	1341.07							adi2mcaRNA6682_R0	1415.46							g14036	244.652
g56979	1340.81							g29927	1412.46							g41234	244.649
adi2mcaRNA37177_R0	1340.36							g10420	1412.38							g35320	244.628
g29895	1340.18							g32776	1408.11							g32764	244.451
adi2mcaRNA1472_R0	1338.78							g54968	1407.47							g55527	244.154
g47444	1338.65							g28810	1407.27							g23764	244.126
g23848	1338.1							g49063	1406.85							g33788	244.106
g12122	1334.77							adi2mcaRNA12641_R0	1406.49							g67780	243.896
g35278	1334.59							g48631	1406.26							g65813	243.868
g24982	1333.63							g45329	1405.8							g2040	243.802
g46143	1333.49							g4141	1404.48							g2048	243.281
g35111	1333.14							g27732	1404.04							g1926	243.098
adi2mcaRNA32347_R0	1332.3							g52847	1403.54							g49518	243.011
g3494	1332.2							adi2mcaRNA29018_R0	1403.05							g68015	242.954
g48862	1332.08							g49291	1401.1							g54943	242.945
adi2mcaRNA2413_R0	1330.67							adi2mcaRNA1443_R0	1400.6							g4765	242.932
g41978	1329.96							g50755	1399.61							g41733	242.924
adi2mcaRNA19095_R0	1329.73							g35033	1397.71							g41429	242.888
g43399	1329.24							g1945	1395.77							g64085	242.419
g17733	1329.08							g13104	1394.55							g28870	242.404
g34444	1327.93							g32807	1393.88							g46325	242.346
g15439	1324.59							g44563	1392.73							g48488	242.345
g35102	1324.3							g48521	1391.99							g24291	242.296
g4141	1323.9							adi2mcaRNA423_R0	1391.84							g40390	242.095
g26495	1322.85							g58377	1390							g31997	242.061
g69366	1322.46							g28024	1387.5							g59121	242.043
g49073	1320.58							g63286	1387.09							g27541	241.884
g53774	1317.81							adi2mcaRNA5543_R0	1385.73							g29323	241.83
g46902	1317.28							g7713	1384.93							g21705	241.699
adi2mcaRNA39386_R3	1317.18							g61598	1384.47							g53518	241.393
g8794	1317.05							g64087	1384.01							g28070	241.368
g24293	1315.79							g50733	1383.65							g36522	241.281
g32810	1315.42							g17903	1383.54							g35914	241.271
g3962	1315.19							g28674	1382.7							adi2mcaRNA36565_R1	241.251
g57618	1314.76							g61016	1382.15							g29887	241.229
adi2mcaRNA33384_R0	1314.72							g45743	1381.2							g30190	241.093
g70879	1311							g66532	1380.47							g22818	240.988
g53109	1310.72							g11101	1379.97							g35512	240.961
g31781	1308.85							g7874	1378.55							adi2mcaRNA24656_R0	240.743
g48684	1308.82							g4767	1378.36							g60351	240.699
g63286	1308.21							g34961	1377.83							g45209	240.698
adi2mcaRNA41094_R4	1307.75							g61013	1373.61							g35456	240.418
g29303	1306.67							g17213	1373.35							g40415	240.418
g50734	1306.35							g23134	1371.85							g21538	240.333
g34001	1305.94							g35142	1371.84							g68939	240.244
g71158	1305.55							g56979	1371.26							g24143	240.14
g23911	1305.39							g26263	1371.16							g45715	239.992
g53865	1304.7							g62829	1368.88							g15185	239.952
g48246	1304.22							g2154	1368.75							g43827	239.88
adi2mcaRNA20515_R0	1302.81							g65828	1367.71							g40026	239.709
g36823	1301.62							g27129	1367.41							g29277	239.631
g28011	1301.3							g16570	1366.18							g23494	238.776
g41437	1299.71							g37587	1365.8							g54907	238.564
g67149	1298.24							g25411	1363.63							adi2mcaRNA12628_R0	238.359
g50780	1298.16							g48489	1363.11							g50917	238.271
g36523	1294.56							g3046	1363							g70205	238.258
g49152	1293.86							adi2mcaRNA29187_R0	1361.86							g62428	238.191
g45509	1293.21							g3565	1361.74							adi2mcaRNA29923_R7	238.178
g69499	1292.59							adi2mcaRNA34600_R0	1360.93							g45329	237.955
g26882	1292.37							g13008	1359.24							g26558	237.864
g35246	1290.99							g54947	1358.52							g39558	237.766
g52847	1289.4							g35289	1358.38							g47627	237.632
g49291	1288.59							g34422	1358.2							g40433	237.554
g33241	1286.91							g37687	1358.02							g59546	237.403
g54604	1286.83							g43048	1356.9							g65329	237.356
g17901	1285.57							g51678	1353.95							g41458	237.347
g54957	1283.84							g51688	1353.67							g33768	237.132
adi2mcaRNA6092_R0	1282.71							g31697	1353.3							g36103	237.052
g32151	1281.92							g36063	1352.97							g37344	236.995
g51105	1280.46							g44634	1352.25							adi2mcaRNA36659_R0	236.818
g5109	1280.43							g23863	1350.43							g22802	236.817
g22543	1280.07							g23813	1350.34							g36735	236.516
g3315	1279.84							g54289	1350.13							g28624	236.501
g5008	1279.65							adi2mcaRNA716_R0	1348.91							g57326	236.496
g6503	1277.92							g25269	1348.57							g25123	236.482
g1829	1276.63							g63260	1347.63							g48485	236.433
g57635	1274.28							adi2mcaRNA3566_R0	1345.61							g48092	236.141
g54436	1273.51							g8029	1345.6							g36041	236.137
adi2mcaRNA3796_R3	1272.18							g47550	1344.52							g38023	236.067
g32951	1269.85							g60646	1344.23							g44601	236.026
g58837	1269.69							g33241	1343.08							g71197	236.014
g39762	1266.86							adi2mcaRNA2413_R0	1341.7							g6503	235.585
g4862	1264.18							g58600	1340.86							g33545	235.559
adi2mcaRNA1849_R0	1262.65							g25505	1340.8							g29198	235.405
g52743	1262.04							g12778	1338.27							g33535	235.235
g5676	1261.83							g21702	1337.71							g49139	235.116
g34515	1261.3							g58442	1337.46							g33432	235.08
adi2mcaRNA11090_R0	1259.99							g381	1337.07							g34168	235.01
g16049	1259.17							g56891	1336.77							g1651	234.957
g17903	1258.76							g7545	1336.29							g47026	234.921
g36424	1256.96							g56228	1335.75							g18538	234.896
g2154	1255.72							g54038	1335.08							g23809	234.821
g3074	1255.47							g32012	1334.18							g35142	234.803
g37684	1255.41							g39844	1333.86							g35952	234.781
g42331	1254.05							g6735	1332.87							g21642	234.657
g35872	1253.74							g31778	1331.65							g31789	234.656
g10191	1253.42							g56099	1331.54							g59495	234.637
g53908	1251.72							g37189	1331.21							adi2mcaRNA28446_R0	234.53
g36820	1249.75							g34639	1330.61							g41501	234.438
g33658	1248.19							g71158	1330.06							g6669	234.425
g65481	1246.5							g68178	1329.08							g51153	234.422
g62729	1246.1							adi2mcaRNA41444_R0	1327.18							g4378	234.276
g42613	1244.47							g37038	1326.92							adi2mcaRNA14954_R0	234.201
g25138	1243.86							g32064	1324.25							g58837	234.036
g26466	1242.87							g26500	1323.37							g27045	233.971
g62261	1242.16							adi2mcaRNA11167_R0	1323.21							g547	233.913
g50710	1240.68							g981	1318.41							g30148	233.663
g14851	1239.9							g61988	1318.12							g33302	233.658
g27843	1239.58							g2033	1317.23							g50627	233.257
g51690	1237.65							g41417	1316.9							g47018	233.121
g5328	1237.31							g36230	1316.86							g600	233.013
g381	1235.56							g64411	1316.77							g40346	232.852
g43711	1234.33							g64322	1316.6							g47021	232.739
g61025	1233.81							g52458	1316.43							g23950	232.708
g49973	1233.57							g24099	1315.96							g32321	232.688
g33873	1232.2							g33950	1315.87							adi2mcaRNA34164_R5	232.624
g5209	1232.14							g36311	1315.41							adi2mcaRNA8500_R0	232.548
g1596	1229.94							g39266	1314.31							g32113	232.494
g46969	1228.55							adi2mcaRNA12375_R0	1313.15							g1593	232.312
g28800	1227.74							g29901	1313.03							g56264	232.122
g37496	1226.04							g15618	1312.82							g54361	231.736
g23861	1225.42							g70993	1312.72							g28771	231.643
g22482	1224.03							g22254	1311.84							g21640	231.516
g48049	1223.22							g12399	1310.56							g47126	231.471
g54026	1223.14							adi2mcaRNA19502_R1	1309.61							g48636	231.363
g66471	1223.01							g33227	1308.92							g54276	231.267
adi2mcaRNA19051_R8	1222.82							g7316	1307.98							g24988	231.178
g32184	1222.7							adi2mcaRNA16004_R0	1306.72							g49078	231.046
g53952	1221.89							g37057	1305.82							g41734	230.87
g16612	1221.4							g39441	1305.61							g67850	230.863
g85	1218.99							g24118	1304.37							g43272	230.844
g64056	1218.74							g27640	1302.77							g35160	230.77
adi2mcaRNA16801_R0	1216.18							g44888	1302.62							g27852	230.428
g48286	1214.9							g6786	1301.88							g65433	230.407
adi2mcaRNA1049_R0	1214.72							g33928	1300.65							g56853	230.294
adi2mcaRNA29187_R0	1214.66							g31917	1300.54							adi2mcaRNA24840_R0	230.247
g21635	1214.43							g35102	1300.15							g21732	230.244
g67155	1213.48							g829	1299.25							g35010	230.107
g53587	1212.99							g43711	1298.69							adi2mcaRNA17564_R0	229.895
adi2mcaRNA7128_R0	1212.57							g53586	1298.32							g310	229.726
g33198	1211.91							g25015	1298.27							g69136	229.715
g54961	1211.24							g42811	1297.24							adi2mcaRNA23838_R0	229.633
g54908	1210.92							g62845	1296.89							g34971	229.506
g31450	1210.9							g34619	1293.97							g16585	229.453
g27564	1209							g1263	1293.97							g58527	229.231
g35957	1208.88							g47589	1293.89							g38017	229.226
g32776	1208.69							g6443	1293.54							g47990	229.185
g5286	1208.64							g32939	1290.69							g24975	229.056
g33952	1208.03							g30050	1290.16							g18350	228.989
g27644	1207.86							adi2mcaRNA4043_R0	1289.72							g3099	228.261
g32156	1207.72							g17901	1288.49							g44690	228.225
g57306	1206.78							g33952	1288.43							g45435	228.17
g31857	1205.11							g45337	1288.43							g35883	228.1
g35015	1205							adi2mcaRNA31556_R0	1288.29							g20010	227.956
adi2mcaRNA8323_R0	1204.95							g62729	1285.31							g26472	227.863
g27081	1204.59							g1359	1285.13							g33996	227.86
g49145	1203.23							g34636	1285							g58599	227.848
g54931	1201.64							g22433	1284.8							g48003	227.804
g54030	1201.3							g54251	1284.71							g45706	227.677
g37593	1201.17							g60830	1283.3							g28242	227.593
adi2mcaRNA1589_R1	1200.07							g26396	1283.22							g28330	227.39
g28539	1197.33							g58160	1283.21							g41417	227.371
g10112	1197.09							adi2mcaRNA33412_R1	1281.29							g6766	227.264
g1826	1196.71							g43399	1280.74							g9924	227.242
g18980	1196.37							g45489	1278.59							g10820	227.216
g3333	1196.17							g30541	1277.34							g22677	227.148
g48388	1195.09							g68020	1276.89							g42582	226.939
g68020	1193.64							g24360	1276.82							g32447	226.932
g45337	1193.31							g48460	1275.31							g54604	226.84
g32070	1193							g28274	1275.24							g34625	226.786
adi2mcaRNA17305_R5	1192.75							g16355	1275.21							adi2mcaRNA13580_R0	226.753
g52463	1192.35							g23749	1275.12							g41931	226.549
g25071	1192.05							g25398	1274.98							g66926	226.433
g17590	1191.37							g6498	1272.52							adi2mcaRNA30550_R0	226.412
g32064	1190.64							g22543	1271.93							g70043	226.38
g28209	1189.18							g54695	1270.85							g30721	226.184
g16001	1187.99							g42439	1270.6							g63106	226.143
adi2mcaRNA23004_R0	1187.38							g22325	1270.52							g25115	226.011
g33837	1187.18							g27151	1269.54							g67732	225.992
g67119	1187.05							g60040	1269.5							g37418	225.965
g15780	1186.4							g61923	1268.83							g23131	225.909
g23892	1184.12							g35249	1266.75							g5052	225.847
g28810	1183.24							g44919	1264.96							g55278	225.782
g64705	1181.9							g23911	1264.67							g44123	225.718
g64943	1181.44							g29303	1262.27							g409	225.495
g33395	1180.89							g1499	1262.05							g17904	225.464
adi2mcaRNA9946_R0	1180.33							g70476	1260.67							g60043	225.41
g33569	1179.86							g29903	1260.42							g38320	225.379
g4655	1178.5							g35939	1260.26							g34628	225.371
g10295	1177.73							adi2mcaRNA21959_R0	1260.09							adi2mcaRNA6021_R0	224.999
g32467	1176.83							adi2mcaRNA32347_R0	1259.79							g54597	224.814
g5178	1176.57							g65506	1257.7							g28075	224.647
g54340	1176.19							g38038	1256.85							g69572	224.618
g14939	1175.89							adi2mcaRNA59_R0	1256.72							g10415	224.602
g9062	1174.51							g22676	1255.86							g2660	224.469
g5327	1174.09							g63846	1254.91							g50891	224.337
g23864	1173.32							g60207	1254.75							g62656	224.213
g41941	1172.91							g37485	1254.38							g41482	224.209
g64508	1172.39							g47419	1252.89							g23909	224.149
g66879	1171.93							adi2mcaRNA25034_R1	1251.84							g68838	224.081
g25594	1171.72							g40659	1250.71							adi2mcaRNA26447_R0	223.988
g62128	1171.69							g50382	1248.27							adi2mcaRNA22032_R0	223.987
g49301	1169.71							adi2mcaRNA29147_R0	1247.25							g28767	223.768
g71201	1168.6							g65105	1246.69							g31175	223.752
g29410	1168.32							g14884	1244.64							g34637	223.727
g35142	1167.77							g3428	1244.23							g37088	223.662
g15238	1167.52							g24266	1243.49							g46293	223.582
g13845	1167.24							g28265	1240.4							g46349	223.332
g21696	1166.82							adi2mcaRNA13751_R1	1240.23							g26483	223.315
g36063	1166.78							adi2mcaRNA4009_R0	1238.73							g22472	223.301
g31852	1165.71							g31210	1238.46							g47596	223.214
g30099	1165.4							g57201	1237.94							g48227	223.171
g31853	1165.03							g31790	1237.16							g9921	223.141
g28771	1164.33							g28240	1235.71							g23471	222.924
g32201	1163.99							g53774	1234.83							g45188	222.796
g34645	1163.8							g41089	1233.55							g34515	222.751
adi2mcaRNA9599_R0	1163.63							g16486	1233.1							g22803	222.694
g5222	1163.38							g34832	1232.15							g7188	222.679
g53416	1162.97							g47152	1230.82							g16447	222.569
adi2mcaRNA11167_R0	1161.81							g54944	1229.52							g4863	222.563
g26538	1161.43							adi2mcaRNA23326_R0	1227.32							g3367	222.488
g53113	1161.19							g16612	1226.91							g3866	222.415
g29854	1159.42							g21650	1226.87							g32121	222.254
g66170	1158.94							g43515	1226.34							g55129	222.21
adi2mcaRNA6309_R0	1158.08							g22569	1225.84							g2303	222.198
g27151	1156.37							g32806	1225.19							g48026	222.038
g41417	1154.29							adi2mcaRNA27030_R0	1225.07							g28879	221.966
g14910	1152.78							g33929	1222.13							g44561	221.942
g30301	1152.6							g51185	1221.33							g51657	221.799
g35028	1151.45							adi2mcaRNA39700_R0	1220.28							g53999	221.751
g16542	1151.36							adi2mcaRNA19051_R8	1219.1							g41037	221.741
g70519	1150.69							g4766	1218.99							g30047	221.693
g5391	1150.41							g31018	1218.69							g65078	221.528
g62829	1150.04							adi2mcaRNA10314_R0	1218.14							g49894	221.271
g53637	1149.62							g50798	1217.57							g38623	221.147
g61850	1147.48							g53113	1217.07							g57521	221.03
g62006	1146.62							g64510	1216.81							g47393	220.866
g7392	1146.57							g49605	1213.88							adi2mcaRNA1815_R0	220.775
g4238	1146.47							g61508	1212.96							g39434	220.69
g32408	1146.17							g30716	1211.68							g54595	220.608
g22483	1144.9							g45695	1211.15							g40749	220.583
g17904	1144.06							g54030	1210.32							g34007	220.483
g23748	1143.87							g62778	1208.59							adi2mcaRNA30718_R0	220.423
g68838	1142							g55980	1208.32							g33871	220.416
adi2mcaRNA966_R1	1140.99							g1874	1207.95							g31710	220.391
g2035	1140.76							g7392	1207.14							g42846	220.284
g39691	1139.06							g16969	1204.9							g48460	220.266
g45464	1137.08							g1548	1204.37							g32206	220.174
g23134	1135.08							adi2mcaRNA23639_R0	1203.66							g24973	220.032
g47105	1135							g36894	1201.96							g40462	220.027
g8414	1134.77							g36720	1200.62							g55629	220.004
g71200	1134.19							g28147	1199.82							g59331	219.835
g55635	1133.19							adi2mcaRNA6682_R1	1199.5							g37231	219.822
g15441	1131.98							g54494	1199.1							g35279	219.731
g15609	1131.92							g32054	1198.45							g53112	219.491
g37947	1131.19							g11850	1197.5							g42305	219.383
g70326	1130.63							g10295	1196.99							g39716	219.358
g49063	1130.55							g7063	1195.76							g51692	219.334
adi2mcaRNA825_R0	1129.86							g53758	1195.42							g34594	219.295
g10931	1129.64							g33651	1194.83							adi2mcaRNA25819_R0	219.244
adi2mcaRNA4547_R0	1129.41							g39434	1193.89							g66628	219.128
g29213	1129.34							adi2mcaRNA1849_R0	1193.75							g18493	219.096
g42290	1128.95							g51690	1193.4							g56265	218.801
g4677	1128.55							g44168	1193.39							g60062	218.786
g30184	1128.32							g22586	1191.17							g66554	218.769
adi2mcaRNA9965_R0	1128.32							g46344	1190.43							g40341	218.726
g51646	1127.42							g4256	1190.42							g15119	218.721
g49629	1126.58							g22530	1189.72							g5571	218.624
g41307	1125.65							adi2mcaRNA7627_R0	1188.41							g21493	218.619
adi2mcaRNA21392_R0	1125.44							g70326	1188.2							g21894	218.404
g54778	1124.89							g32246	1186.66							g47231	218.3
g25484	1124.75							g49150	1185.46							adi2mcaRNA24296_R0	218.175
g70889	1122.24							g37488	1185.22							g52838	218.157
g53099	1121.12							g28242	1184.13							adi2mcaRNA26989_R0	218.142
g54982	1120.44							g23046	1183.65							g50723	218.084
adi2mcaRNA27705_R0	1120.34							g21716	1183.51							g53967	218.002
g37345	1119.95							g11963	1182.87							g46869	217.855
g1894	1119.3							g49142	1182.16							g40445	217.715
g31778	1118.31							g29675	1179.88							adi2mcaRNA23500_R0	217.677
adi2mcaRNA39334_R0	1117.92							g64471	1179.68							g40448	217.623
g4766	1117.85							g44683	1179.45							adi2mcaRNA16130_R0	217.512
g63046	1117.57							g43845	1179.43							g37389	217.428
g46482	1117.56							g49152	1179.37							g58187	217.408
g31210	1117.51							g58049	1179.16							g58965	217.111
g31754	1117.51							g24060	1178.42							g23537	217.092
g29205	1117.21							g31886	1177.43							g52100	217.056
g32807	1116.76							g37213	1176.86							g57109	217.025
adi2mcaRNA28950_R0	1114.85							g48096	1173.76							g69802	216.961
g63378	1114.21							g42829	1172.92							g12275	216.165
g64353	1114.11							g32204	1171.31							g60451	215.791
g33178	1114.09							g57145	1170.91							g34008	215.778
g58864	1114.07							g41133	1170							g54693	215.653
g48105	1113.79							g70204	1169.24							g61325	215.632
[truncated: 61,228 more rows]

## Sheet: Annotations
Name		Sperm TPM	Egg TPM	Accession	PID	E-value	Bitscore	Description	KEGG	Annotation GO ID	Annotation GO Term
adi2mcaRNA10_R0	adi2mcaRNA10_R0	0	0	XP_015777247.1	86	5.9e-186	659.8	>XP_015777247.1 PREDICTED: uncharacterized protein LOC107355227 [Acropora digitifera]	0	0	0
adi2mcaRNA10013_R0	adi2mcaRNA10013_R0	4298.07	5484.67	XP_015756304.1	88	0	1516.5	>XP_015756304.1 PREDICTED: serine/threonine-protein kinase N2-like isoform X2 [Acropora digitifera]	0	GO:0004674;GO:0005524;GO:0017049;GO:0018105;GO:0035556;GO:0046777;GO:0071320;GO:2000767	protein serine/threonine kinase activity;ATP binding;GTP-Rho binding;peptidyl-serine phosphorylation;intracellular signal transduction;protein autophosphorylation;cellular response to cAMP;positive regulation of cytoplasmic translation
adi2mcaRNA10016_R5	adi2mcaRNA10016_R5	0	0	XP_020602249.1	61	1.1e-07	65.9	>XP_020602249.1 endochitinase 2-like [Orbicella faveolata]	0	0	0
adi2mcaRNA10017_R1	adi2mcaRNA10017_R1	275.977	178.658	XP_015756315.1	61.4	3.6e-78	301.2	>XP_015756315.1 PREDICTED: ribonuclease P protein subunit p30-like [Acropora digitifera]	K03539	GO:0003723;GO:0004540;GO:0008033;GO:0030681;GO:0090501	RNA binding;ribonuclease activity;tRNA processing;multimeric ribonuclease P complex;RNA phosphodiester bond hydrolysis
adi2mcaRNA10018_R0	adi2mcaRNA10018_R0	0	0	XP_015756311.1	73.4	6.3e-130	473.4	>XP_015756311.1 PREDICTED: neuropeptide FF receptor 1-like [Acropora digitifera]	0	0	0
adi2mcaRNA10022_R0	adi2mcaRNA10022_R0	123.005	129.423	XP_015756257.1	71.6	0	1901.7	>XP_015756257.1 PREDICTED: complement C3-like [Acropora digitifera]	0	0	0
adi2mcaRNA10025_R0	adi2mcaRNA10025_R0	0	0	XP_020624510.1	63	2.7e-296	1026.9	>XP_020624510.1 A disintegrin and metalloproteinase with thrombospondin motifs 6-like [Orbicella faveolata]	0	0	0
adi2mcaRNA10028_R1	adi2mcaRNA10028_R1	0	0	XP_015756317.1	84.9	1e-59	238.8	>XP_015756317.1 PREDICTED: uncharacterized protein LOC107335792 isoform X2 [Acropora digitifera]	0	0	0
adi2mcaRNA10028_R3	adi2mcaRNA10028_R3	441.998	1055.13	XP_015756316.1	82.7	3.6e-57	230.3	>XP_015756316.1 PREDICTED: uncharacterized protein LOC107335792 isoform X1 [Acropora digitifera]	0	0	0
adi2mcaRNA10043_R1	adi2mcaRNA10043_R1	0	0	XP_015756326.1	74.8	7.4e-211	742.7	>XP_015756326.1 PREDICTED: senecionine N-oxygenase-like [Acropora digitifera]	K18277	GO:0004499;GO:0050660;GO:0050661;GO:0055114	N,N-dimethylaniline monooxygenase activity;flavin adenine dinucleotide binding;NADP binding;oxidation-reduction process
adi2mcaRNA10065_R8	adi2mcaRNA10065_R8	0	0	XP_022794663.1	63.5	2e-24	121.7	>XP_022794663.1 uncharacterized protein LOC111333379 [Stylophora pistillata]	0	GO:0000166;GO:0003677;GO:0004674;GO:0016021;GO:0016310;GO:0050794	nucleotide binding;DNA binding;protein serine/threonine kinase activity;integral component of membrane;phosphorylation;regulation of cellular process
adi2mcaRNA10065_R9	adi2mcaRNA10065_R9	0	0	PFX13594.1	42.4	1.9e-18	102.1	>PFX13594.1 Uncharacterized protein K02A2.6 [Stylophora pistillata]	0	GO:0005488	binding
adi2mcaRNA1007_R1	adi2mcaRNA1007_R1	33.0497	7.51488	#N/A	#N/A	#N/A	#N/A	#N/A	0	0	0
adi2mcaRNA1007_R2	adi2mcaRNA1007_R2	0	0	XP_015756443.1	83.3	7.2e-07	65.5	>XP_015756443.1 PREDICTED: uncharacterized protein LOC107335901 [Acropora digitifera]	0	0	0
adi2mcaRNA1007_R4	adi2mcaRNA1007_R4	0	0	#N/A	#N/A	#N/A	#N/A	#N/A	0	0	0
adi2mcaRNA10072_R0	adi2mcaRNA10072_R0	41.5074	72.2474	XP_015756343.1	75.9	3.7e-306	1060.1	>XP_015756343.1 PREDICTED: protocadherin-like protein [Acropora digitifera]	0	GO:0005509;GO:0005886;GO:0007156;GO:0016021	calcium ion binding;plasma membrane;homophilic cell adhesion via plasma membrane adhesion molecules;integral component of membrane
adi2mcaRNA10073_R0	adi2mcaRNA10073_R0	45.2103	39.292	XP_015756278.1	74	0	8816.4	>XP_015756278.1 PREDICTED: protocadherin-like protein [Acropora digitifera]	K16506	GO:0016020;GO:0098609	membrane;cell-cell adhesion
adi2mcaRNA10081_R0	adi2mcaRNA10081_R0	118.665	86.1937	XP_015756348.1	71.8	1.8e-242	848.2	>XP_015756348.1 PREDICTED: uncharacterized protein LOC107335823 [Acropora digitifera]	0	0	0
adi2mcaRNA10085_R0	adi2mcaRNA10085_R0	571.023	675.887	XP_015756350.1	75	5.8e-196	693.3	>XP_015756350.1 PREDICTED: uncharacterized protein LOC107335824 [Acropora digitifera]	0	GO:0005509	calcium ion binding
adi2mcaRNA1009_R0	adi2mcaRNA1009_R0	609.415	563.858	XP_015754824.1	52.7	1.5e-59	239.2	>XP_015754824.1 PREDICTED: uncharacterized protein LOC107334403 [Acropora digitifera]	0	0	0
adi2mcaRNA10131_R0	adi2mcaRNA10131_R0	520.747	526.302	XP_015756408.1	87.2	3e-127	464.2	>XP_015756408.1 PREDICTED: PQ-loop repeat-containing protein 1-like [Acropora digitifera]	K23679	GO:0005768;GO:0005802;GO:0005829;GO:0016021;GO:0042147;GO:0045332	endosome;trans-Golgi network;cytosol;integral component of membrane;retrograde transport, endosome to Golgi;phospholipid translocation
adi2mcaRNA10132_R0	adi2mcaRNA10132_R0	312.699	386.121	XP_015756409.1	86.5	1.2e-307	1064.7	>XP_015756409.1 PREDICTED: lysine--tRNA ligase-like isoform X1 [Acropora digitifera]	K04567	GO:0000049;GO:0000187;GO:0002276;GO:0003877;GO:0004824;GO:0005524;GO:0005615;GO:0005634;GO:0005739;GO:0005829;GO:0006430;GO:0015966;GO:0017101;GO:0033209;GO:0043032	tRNA binding;activation of MAPK activity;basophil activation involved in immune response;ATP adenylyltransferase activity;lysine-tRNA ligase activity;ATP binding;extracellular space;nucleus;mitochondrion;cytosol;lysyl-tRNA aminoacylation;diadenosine tetraphosphate biosynthetic process;aminoacyl-tRNA synthetase multienzyme complex;tumor necrosis factor-mediated signaling pathway;positive regulatio…
adi2mcaRNA10172_R0	adi2mcaRNA10172_R0	0	0	XP_015756361.1	66.3	0	1462.6	>XP_015756361.1 PREDICTED: uncharacterized protein K02A2.6-like [Acropora digitifera]	0	GO:0005488	binding
adi2mcaRNA10172_R1	adi2mcaRNA10172_R1	0	0	XP_015756361.1	64.2	0	1336.6	>XP_015756361.1 PREDICTED: uncharacterized protein K02A2.6-like [Acropora digitifera]	0	0	0
adi2mcaRNA10172_R2	adi2mcaRNA10172_R2	0	0	XP_015756361.1	57.9	0	1189.1	>XP_015756361.1 PREDICTED: uncharacterized protein K02A2.6-like [Acropora digitifera]	0	0	0
adi2mcaRNA10172_R3	adi2mcaRNA10172_R3	0	0	KXJ20749.1	50.2	0	1127.9	>KXJ20749.1 Transposon Ty3-G Gag-Pol polyprotein [Exaiptasia pallida]	0	0	0
adi2mcaRNA10172_R4	adi2mcaRNA10172_R4	0	0	XP_015756361.1	50.4	1.9e-303	1051.6	>XP_015756361.1 PREDICTED: uncharacterized protein K02A2.6-like [Acropora digitifera]	0	0	0
adi2mcaRNA10172_R5	adi2mcaRNA10172_R5	0	0	KXJ20749.1	49.1	0	1088.9	>KXJ20749.1 Transposon Ty3-G Gag-Pol polyprotein [Exaiptasia pallida]	0	0	0
adi2mcaRNA10172_R7	adi2mcaRNA10172_R7	0	0	KXJ20749.1	48.7	0	1092.8	>KXJ20749.1 Transposon Ty3-G Gag-Pol polyprotein [Exaiptasia pallida]	0	0	0
adi2mcaRNA10172_R9	adi2mcaRNA10172_R9	0	0	KXJ20749.1	49.4	0	1079.7	>KXJ20749.1 Transposon Ty3-G Gag-Pol polyprotein [Exaiptasia pallida]	0	0	0
adi2mcaRNA10177_R0	adi2mcaRNA10177_R0	0	0	XP_015756363.1	64.6	0	1353.6	>XP_015756363.1 PREDICTED: uncharacterized protein LOC107335839 [Acropora digitifera]	0	0	0
adi2mcaRNA10177_R1	adi2mcaRNA10177_R1	0	0	XP_015756363.1	54.5	0	1242.3	>XP_015756363.1 PREDICTED: uncharacterized protein LOC107335839 [Acropora digitifera]	0	0	0
adi2mcaRNA10177_R2	adi2mcaRNA10177_R2	0	0	XP_015756363.1	50.7	0	1102.4	>XP_015756363.1 PREDICTED: uncharacterized protein LOC107335839 [Acropora digitifera]	0	0	0
adi2mcaRNA10177_R3	adi2mcaRNA10177_R3	0	0	XP_015756363.1	63.3	0	1107	>XP_015756363.1 PREDICTED: uncharacterized protein LOC107335839 [Acropora digitifera]	0	0	0
adi2mcaRNA10177_R4	adi2mcaRNA10177_R4	0	0	XP_015756363.1	56.3	1.6e-302	1048.1	>XP_015756363.1 PREDICTED: uncharacterized protein LOC107335839 [Acropora digitifera]	0	0	0
adi2mcaRNA10177_R5	adi2mcaRNA10177_R5	0	0	XP_015756363.1	55.9	2.4e-301	1044.3	>XP_015756363.1 PREDICTED: uncharacterized protein LOC107335839 [Acropora digitifera]	0	0	0
adi2mcaRNA10177_R6	adi2mcaRNA10177_R6	0	0	XP_022810133.1	47.3	0	1099	>XP_022810133.1 uncharacterized protein LOC111347146 [Stylophora pistillata]	0	GO:0006139	nucleobase-containing compound metabolic process
adi2mcaRNA1019_R0	adi2mcaRNA1019_R0	93.3763	86.8732	XP_015754846.1	79.5	1.8e-167	598.2	>XP_015754846.1 PREDICTED: uncharacterized protein LOC107334425 [Acropora digitifera]	K05810	GO:0005507	copper ion binding
adi2mcaRNA10193_R1	adi2mcaRNA10193_R1	2.87721	0	XP_015756450.1	56.2	2e-102	383.3	>XP_015756450.1 PREDICTED: fibulin-1-like [Acropora digitifera]	0	0	0
adi2mcaRNA10194_R4	adi2mcaRNA10194_R4	0	0	XP_015756465.1	62.3	4e-89	337.4	>XP_015756465.1 PREDICTED: uncharacterized protein LOC107335930 [Acropora digitifera]	0	0	0
adi2mcaRNA10194_R8	adi2mcaRNA10194_R8	0	0	XP_020915184.1	58.4	1.8e-96	362.1	>XP_020915184.1 uncharacterized protein LOC110252688 [Exaiptasia pallida]	0	0	0
adi2mcaRNA10194_R9	adi2mcaRNA10194_R9	0	0	KXJ14173.1	37.5	2.7e-46	195.3	>KXJ14173.1 hypothetical protein AC249_AIPGENE19278 [Exaiptasia pallida]	0	0	0
adi2mcaRNA10204_R0	adi2mcaRNA10204_R0	0	0	XP_015756463.1	59.3	4.6e-41	177.2	>XP_015756463.1 PREDICTED: zinc finger protein 397-like [Acropora digitifera]	0	0	0
adi2mcaRNA10208_R0	adi2mcaRNA10208_R0	0	0	XP_015756455.1	91.9	2.9e-52	214.2	>XP_015756455.1 PREDICTED: uncharacterized protein LOC107335915 [Acropora digitifera]	0	GO:0003678;GO:0006281;GO:0006310;GO:0032508;GO:0043229	DNA helicase activity;DNA repair;DNA recombination;DNA duplex unwinding;intracellular organelle
adi2mcaRNA10208_R3	adi2mcaRNA10208_R3	0	0	XP_015756455.1	90.3	9.3e-51	209.1	>XP_015756455.1 PREDICTED: uncharacterized protein LOC107335915 [Acropora digitifera]	0	GO:0003678;GO:0006281;GO:0006310;GO:0032508;GO:0043229	DNA helicase activity;DNA repair;DNA recombination;DNA duplex unwinding;intracellular organelle
adi2mcaRNA1021_R0	adi2mcaRNA1021_R0	451.227	389.262	XP_015756549.1	92.9	7.3e-146	526.2	>XP_015756549.1 PREDICTED: trifunctional enzyme subunit beta, mitochondrial-like [Acropora digitifera]	K00626	GO:0003988;GO:0004300;GO:0005739;GO:0006635;GO:0016508;GO:0016509	acetyl-CoA C-acyltransferase activity;enoyl-CoA hydratase activity;mitochondrion;fatty acid beta-oxidation;long-chain-enoyl-CoA hydratase activity;long-chain-3-hydroxyacyl-CoA dehydrogenase activity
adi2mcaRNA10211_R5	adi2mcaRNA10211_R5	0	0	XP_015756456.1	77.5	5.8e-121	444.1	>XP_015756456.1 PREDICTED: uncharacterized protein LOC107335916 [Acropora digitifera]	0	0	0
adi2mcaRNA1022_R0	adi2mcaRNA1022_R0	26.5846	22.0521	XP_015754869.1	71.7	4.8e-135	490.3	>XP_015754869.1 PREDICTED: uncharacterized protein LOC107334440 [Acropora digitifera]	0	GO:0004888;GO:0005216;GO:0007154;GO:0016021;GO:0023052;GO:0034220;GO:0065007	transmembrane signaling receptor activity;ion channel activity;cell communication;integral component of membrane;signaling;ion transmembrane transport;biological regulation
adi2mcaRNA10224_R0	adi2mcaRNA10224_R0	0	0	XP_015756460.1	69.6	2.4e-164	588.2	>XP_015756460.1 PREDICTED: uncharacterized protein LOC107335921 [Acropora digitifera]	0	0	0
adi2mcaRNA10224_R4	adi2mcaRNA10224_R4	0	0	XP_015758275.1	57	8e-76	294.3	>XP_015758275.1 PREDICTED: uncharacterized protein LOC107337583 [Acropora digitifera]	0	0	0
adi2mcaRNA10224_R7	adi2mcaRNA10224_R7	0	0	XP_015756460.1	45.9	1.3e-75	293.5	>XP_015756460.1 PREDICTED: uncharacterized protein LOC107335921 [Acropora digitifera]	0	0	0
adi2mcaRNA10224_R8	adi2mcaRNA10224_R8	0	0	XP_015756460.1	40.4	1.3e-67	266.9	>XP_015756460.1 PREDICTED: uncharacterized protein LOC107335921 [Acropora digitifera]	0	0	0
adi2mcaRNA10226_R5	adi2mcaRNA10226_R5	0	0	XP_015756477.1	64.3	4e-128	467.6	>XP_015756477.1 PREDICTED: hemicentin-2-like isoform X3 [Acropora digitifera]	0	0	0
adi2mcaRNA10232_R1	adi2mcaRNA10232_R1	0	0	XP_015756486.1	87.8	1.3e-196	695.3	>XP_015756486.1 PREDICTED: uncharacterized protein LOC107335949 [Acropora digitifera]	0	GO:0004527;GO:0008270;GO:0090305	exonuclease activity;zinc ion binding;nucleic acid phosphodiester bond hydrolysis
adi2mcaRNA10239_R0	adi2mcaRNA10239_R0	0	0	XP_015756509.1	71.8	8.9e-216	759.6	>XP_015756509.1 PREDICTED: hemicentin-2-like isoform X4 [Acropora digitifera]	0	0	0
adi2mcaRNA10239_R2	adi2mcaRNA10239_R2	0	0	XP_015770840.1	72.6	1.9e-218	768.5	>XP_015770840.1 PREDICTED: uncharacterized protein LOC107349245 [Acropora digitifera]	0	0	0
adi2mcaRNA10239_R5	adi2mcaRNA10239_R5	0	4.07251	XP_015756507.1	72.6	1.1e-216	762.7	>XP_015756507.1 PREDICTED: hemicentin-2-like isoform X2 [Acropora digitifera]	0	0	0
adi2mcaRNA10240_R2	adi2mcaRNA10240_R2	2.40969	0	XP_015756509.1	70.4	4.5e-212	747.3	>XP_015756509.1 PREDICTED: hemicentin-2-like isoform X4 [Acropora digitifera]	0	0	0
adi2mcaRNA10243_R2	adi2mcaRNA10243_R2	9.77507	6.2921	XP_015778977.1	61.4	2.7e-276	961.1	>XP_015778977.1 PREDICTED: uncharacterized protein LOC107356863 isoform X3 [Acropora digitifera]	0	0	0
adi2mcaRNA10252_R6	adi2mcaRNA10252_R6	0	0	XP_015777168.1	48.1	1.2e-274	956.1	>XP_015777168.1 PREDICTED: protein NLRC3-like isoform X4 [Acropora digitifera]	0	0	0
adi2mcaRNA10252_R7	adi2mcaRNA10252_R7	0	0.268602	XP_015756823.1	52.1	3.1e-293	1017.7	>XP_015756823.1 PREDICTED: uncharacterized protein LOC107336267 isoform X1 [Acropora digitifera]	0	0	0
adi2mcaRNA10252_R8	adi2mcaRNA10252_R8	0	0.310283	XP_015767800.1	46	5.8e-261	910.6	>XP_015767800.1 PREDICTED: protein NLRC3-like [Acropora digitifera]	K22614	0	0
adi2mcaRNA10252_R9	adi2mcaRNA10252_R9	1.49101	0.673925	XP_015777164.1	51.1	5.3e-290	1007.3	>XP_015777164.1 PREDICTED: protein NLRC3-like isoform X1 [Acropora digitifera]	K22614	0	0
adi2mcaRNA10278_R0	adi2mcaRNA10278_R0	0	0	XP_015756492.1	61.8	3.1e-117	431.4	>XP_015756492.1 PREDICTED: methyltransferase-like protein 2 [Acropora digitifera]	0	0	0
adi2mcaRNA10278_R1	adi2mcaRNA10278_R1	25.6246	5.11629	XP_015756492.1	61.4	6.2e-115	423.7	>XP_015756492.1 PREDICTED: methyltransferase-like protein 2 [Acropora digitifera]	0	GO:0008152;GO:0008168	metabolic process;methyltransferase activity
adi2mcaRNA10296_R0	adi2mcaRNA10296_R0	4502.71	7247.66	XP_015756546.1	86.8	2.4e-25	126.3	>XP_015756546.1 PREDICTED: WAS/WASL-interacting protein family member 1-like [Acropora digitifera]	K19475	0	0
adi2mcaRNA10298_R0	adi2mcaRNA10298_R0	2065.98	2179.09	XP_015756545.1	91.1	1.2e-275	958.4	>XP_015756545.1 PREDICTED: 60 kDa heat shock protein, mitochondrial-like [Acropora digitifera]	K04077	GO:0001530;GO:0002039;GO:0005524;GO:0005759;GO:0005782;GO:0005791;GO:0005829;GO:0005886;GO:0006458;GO:0008637;GO:0009409;GO:0009986;GO:0016853;GO:0030061;GO:0031625;GO:0032496;GO:0032727;GO:0032729;GO:0032991;GO:0033198;GO:0042026;GO:0042588;GO:0043032;GO:0043524;GO:0045041;GO:0050729;GO:0050870;GO:0051082;GO:0098761;GO:1904469	lipopolysaccharide binding;p53 binding;ATP binding;mitochondrial matrix;peroxisomal matrix;rough endoplasmic reticulum;cytosol;plasma membrane;'de novo' protein folding;apoptotic mitochondrial changes;response to cold;cell surface;isomerase activity;mitochondrial crista;ubiquitin protein ligase binding;response to lipopolysaccharide;positive regulation of interferon-alpha production;positive regu…
adi2mcaRNA10301_R1	adi2mcaRNA10301_R1	0	0	XP_015756551.1	59	3.9e-128	467.6	>XP_015756551.1 PREDICTED: uncharacterized protein LOC107336009 [Acropora digitifera]	0	GO:0003824;GO:0019388;GO:0110165	catalytic activity;galactose catabolic process;cellular anatomical entity
adi2mcaRNA10301_R2	adi2mcaRNA10301_R2	0	0	XP_015756551.1	58.3	1.4e-118	435.6	>XP_015756551.1 PREDICTED: uncharacterized protein LOC107336009 [Acropora digitifera]	0	GO:0003824;GO:0019388;GO:0110165	catalytic activity;galactose catabolic process;cellular anatomical entity
adi2mcaRNA10307_R0	adi2mcaRNA10307_R0	238.25	419.732	XP_015756555.1	90.5	5.2e-189	669.8	>XP_015756555.1 PREDICTED: serine hydroxymethyltransferase, mitochondrial-like [Acropora digitifera]	K00600	GO:0002082;GO:0003682;GO:0004372;GO:0005743;GO:0006565;GO:0008168;GO:0008270;GO:0015630;GO:0019264;GO:0030170;GO:0032259;GO:0034340;GO:0035999;GO:0042645;GO:0042802;GO:0046655;GO:0050897;GO:0051289;GO:0070129;GO:0070536;GO:0070552;GO:0070905;GO:1903715;GO:1904482	regulation of oxidative phosphorylation;chromatin binding;glycine hydroxymethyltransferase activity;mitochondrial inner membrane;L-serine catabolic process;methyltransferase activity;zinc ion binding;microtubule cytoskeleton;glycine biosynthetic process from serine;pyridoxal phosphate binding;methylation;response to type I interferon;tetrahydrofolate interconversion;mitochondrial nucleoid;identic…
adi2mcaRNA10310_R0	adi2mcaRNA10310_R0	506.34	144.357	XP_015756498.1	77.4	2.8e-144	521.2	>XP_015756498.1 PREDICTED: dynactin subunit 2-like [Acropora digitifera]	K10424	GO:0007017;GO:0015630	microtubule-based process;microtubule cytoskeleton
adi2mcaRNA10314_R0	adi2mcaRNA10314_R0	1218.14	455.575	XP_020601579.1	83.8	3.9e-57	230.3	>XP_020601579.1 60S ribosomal protein L27-like [Orbicella faveolata]	K02901	GO:0003735;GO:0006412;GO:0022625;GO:0030218;GO:0098556	structural constituent of ribosome;translation;cytosolic large ribosomal subunit;erythrocyte differentiation;cytoplasmic side of rough endoplasmic reticulum membrane
adi2mcaRNA10333_R0	adi2mcaRNA10333_R0	14.9014	10.8867	XP_015756504.1	54.2	5.7e-93	350.5	>XP_015756504.1 PREDICTED: uncharacterized protein LOC107335968 [Acropora digitifera]	0	0	0
adi2mcaRNA10344_R0	adi2mcaRNA10344_R0	44.2087	22.3356	XP_015756618.1	84.8	0	1159.4	>XP_015756618.1 PREDICTED: AMP deaminase 2-like isoform X1 [Acropora digitifera]	K01490	GO:0003876;GO:0032264;GO:0046872	AMP deaminase activity;IMP salvage;metal ion binding
adi2mcaRNA10355_R0	adi2mcaRNA10355_R0	136.843	40.7955	XP_015756587.1	81	5.3e-145	523.5	>XP_015756587.1 PREDICTED: uncharacterized protein LOC107336042 [Acropora digitifera]	0	0	0
adi2mcaRNA10361_R0	adi2mcaRNA10361_R0	33.6881	82.716	XP_015756624.1	90.3	3.3e-213	750.4	>XP_015756624.1 PREDICTED: UDP-N-acetylglucosamine--dolichyl-phosphate N-acetylglucosaminephosphotransferase-like [Acropora digitifera]	K01001	GO:0003975;GO:0006489;GO:0008963;GO:0016021	UDP-N-acetylglucosamine-dolichyl-phosphate N-acetylglucosaminephosphotransferase activity;dolichyl diphosphate biosynthetic process;phospho-N-acetylmuramoyl-pentapeptide-transferase activity;integral component of membrane
adi2mcaRNA10369_R0	adi2mcaRNA10369_R0	2054.65	2495.42	XP_015756635.1	54.4	7.6e-25	123.2	>XP_015756635.1 PREDICTED: uncharacterized protein LOC107336085 [Acropora digitifera]	0	0	0
adi2mcaRNA10371_R0	adi2mcaRNA10371_R0	348.357	426.935	XP_015756635.1	57.4	7.3e-46	193.4	>XP_015756635.1 PREDICTED: uncharacterized protein LOC107336085 [Acropora digitifera]	0	0	0
adi2mcaRNA10379_R1	adi2mcaRNA10379_R1	0	0	XP_015756596.1	43.2	1.1e-14	89	>XP_015756596.1 PREDICTED: uncharacterized protein LOC107336050 [Acropora digitifera]	0	0	0
adi2mcaRNA10389_R5	adi2mcaRNA10389_R5	0	0	XP_015756644.1	78.6	2.8e-48	201.4	>XP_015756644.1 PREDICTED: uncharacterized protein LOC107336095 [Acropora digitifera]	0	0	0
adi2mcaRNA10389_R8	adi2mcaRNA10389_R8	0	0	XP_015756644.1	76.3	7.9e-45	189.9	>XP_015756644.1 PREDICTED: uncharacterized protein LOC107336095 [Acropora digitifera]	0	0	0
adi2mcaRNA10389_R9	adi2mcaRNA10389_R9	0	0	XP_020617325.1	84.6	4.9e-70	273.5	>XP_020617325.1 uncharacterized protein LOC110055289 [Orbicella faveolata]	0	GO:0005509	calcium ion binding
adi2mcaRNA10392_R8	adi2mcaRNA10392_R8	0	0	XP_015752841.1	72.6	2e-90	341.7	>XP_015752841.1 PREDICTED: uncharacterized protein LOC107332618 [Acropora digitifera]	0	0	0
adi2mcaRNA10397_R0	adi2mcaRNA10397_R0	59.7	86.1186	XP_015756649.1	62.8	5e-227	797	>XP_015756649.1 PREDICTED: retinoblastoma-associated protein-like isoform X2 [Acropora digitifera]	0	GO:0050794	regulation of cellular process
adi2mcaRNA10404_R0	adi2mcaRNA10404_R0	8.71252	0	XP_015756656.1	56.5	1e-68	269.6	>XP_015756656.1 PREDICTED: uncharacterized protein LOC107336107 [Acropora digitifera]	0	0	0
adi2mcaRNA10406_R0	adi2mcaRNA10406_R0	179.045	246.264	XP_015756605.1	55.6	0	1431.8	>XP_015756605.1 PREDICTED: uncharacterized protein LOC107336058 [Acropora digitifera]	0	0	0
adi2mcaRNA10415_R0	adi2mcaRNA10415_R0	0	0	XP_015756650.1	62.4	5.6e-167	597	>XP_015756650.1 PREDICTED: uncharacterized protein LOC107336102 isoform X1 [Acropora digitifera]	0	0	0
adi2mcaRNA10437_R0	adi2mcaRNA10437_R0	12.5678	0.873961	XP_015756609.1	66.5	4.4e-283	983.8	>XP_015756609.1 PREDICTED: uncharacterized protein LOC107336061 [Acropora digitifera]	K16678	GO:0016020	membrane
adi2mcaRNA10443_R0	adi2mcaRNA10443_R0	1454.76	445.861	XP_015756679.1	86.7	5.8e-122	446.8	>XP_015756679.1 PREDICTED: phospholipid scramblase 2-like [Acropora digitifera]	0	GO:0001228;GO:0005154;GO:0005509;GO:0005730;GO:0005794;GO:0005829;GO:0005887;GO:0006353;GO:0006915;GO:0017121;GO:0017124;GO:0017128;GO:0033003;GO:0042609;GO:0045071;GO:0045089;GO:0045121;GO:0045944;GO:0051607;GO:0060368;GO:0062023;GO:2000373	DNA-binding transcription activator activity, RNA polymerase II-specific;epidermal growth factor receptor binding;calcium ion binding;nucleolus;Golgi apparatus;cytosol;integral component of plasma membrane;DNA-templated transcription, termination;apoptotic process;plasma membrane phospholipid scrambling;SH3 domain binding;phospholipid scramblase activity;regulation of mast cell activation;CD4 rec…
adi2mcaRNA10446_R0	adi2mcaRNA10446_R0	0	0	XP_015756678.1	83.5	8.1e-254	885.6	>XP_015756678.1 PREDICTED: arylsulfatase B-like [Acropora digitifera]	0	GO:0005488;GO:0008484	binding;sulfuric ester hydrolase activity
adi2mcaRNA10446_R5	adi2mcaRNA10446_R5	22.2188	25.1985	XP_020629583.1	63.7	4.1e-191	677.2	>XP_020629583.1 arylsulfatase B-like [Orbicella faveolata]	0	GO:0003824	catalytic activity
adi2mcaRNA10451_R0	adi2mcaRNA10451_R0	30.6368	28.5939	XP_015756610.1	63.3	9.2e-306	1059.3	>XP_015756610.1 PREDICTED: BRCA2-interacting transcriptional repressor EMSY-like [Acropora digitifera]	0	GO:0003700;GO:0005634;GO:0006355	DNA-binding transcription factor activity;nucleus;regulation of transcription, DNA-templated
adi2mcaRNA10458_R1	adi2mcaRNA10458_R1	0	0	XP_020603194.1	36.1	4.3e-24	121.3	>XP_020603194.1 uncharacterized protein LOC110042187 [Orbicella faveolata]	0	0	0
adi2mcaRNA1047_R0	adi2mcaRNA1047_R0	52.6104	38.7897	XP_020630689.1	73.5	9.8e-106	392.5	>XP_020630689.1 mRNA export factor-like [Orbicella faveolata]	0	GO:0000972;GO:0003723;GO:0005643;GO:0006259;GO:0006406;GO:0043130	transcription-dependent tethering of RNA polymerase II gene DNA at nuclear periphery;RNA binding;nuclear pore;DNA metabolic process;mRNA export from nucleus;ubiquitin binding
adi2mcaRNA10479_R0	adi2mcaRNA10479_R0	0	0	XP_015756708.1	80.2	1.2e-251	878.6	>XP_015756708.1 PREDICTED: uncharacterized protein LOC107336155 [Acropora digitifera]	0	0	0
adi2mcaRNA10479_R1	adi2mcaRNA10479_R1	0	0	XP_015756708.1	53	8.1e-147	530	>XP_015756708.1 PREDICTED: uncharacterized protein LOC107336155 [Acropora digitifera]	0	0	0
adi2mcaRNA10480_R4	adi2mcaRNA10480_R4	0	0	KXJ07107.1	47.4	7.5e-75	290	>KXJ07107.1 hypothetical protein AC249_AIPGENE5113 [Exaiptasia pallida]	0	0	0
adi2mcaRNA10482_R0	adi2mcaRNA10482_R0	0	0	XP_015756710.1	66.7	0	2580.1	>XP_015756710.1 PREDICTED: uncharacterized protein LOC107336157 [Acropora digitifera]	0	0	0
adi2mcaRNA10482_R1	adi2mcaRNA10482_R1	0.393765	0.387271	XP_015756710.1	66.1	0	2545.4	>XP_015756710.1 PREDICTED: uncharacterized protein LOC107336157 [Acropora digitifera]	0	0	0
adi2mcaRNA10482_R2	adi2mcaRNA10482_R2	0	0	XP_015756710.1	65.3	0	2508.8	>XP_015756710.1 PREDICTED: uncharacterized protein LOC107336157 [Acropora digitifera]	0	0	0
adi2mcaRNA10482_R5	adi2mcaRNA10482_R5	0	0	XP_015756710.1	64.4	0	2451.4	>XP_015756710.1 PREDICTED: uncharacterized protein LOC107336157 [Acropora digitifera]	0	0	0
adi2mcaRNA10482_R7	adi2mcaRNA10482_R7	0	0	XP_015756710.1	60.5	0	2350.1	>XP_015756710.1 PREDICTED: uncharacterized protein LOC107336157 [Acropora digitifera]	0	0	0
adi2mcaRNA10482_R8	adi2mcaRNA10482_R8	0	0	XP_015756710.1	60.8	0	2351.2	>XP_015756710.1 PREDICTED: uncharacterized protein LOC107336157 [Acropora digitifera]	0	0	0
adi2mcaRNA10482_R9	adi2mcaRNA10482_R9	0	0	XP_015756710.1	63.1	0	2376.3	>XP_015756710.1 PREDICTED: uncharacterized protein LOC107336157 [Acropora digitifera]	0	0	0
adi2mcaRNA10483_R7	adi2mcaRNA10483_R7	0	0	XP_015778507.1	41.5	6.7e-35	157.1	>XP_015778507.1 PREDICTED: uncharacterized protein LOC107356400 [Acropora digitifera]	0	0	0
adi2mcaRNA10485_R1	adi2mcaRNA10485_R1	0	0	XP_015756712.1	93.4	0	2226.8	>XP_015756712.1 PREDICTED: uncharacterized protein LOC107336159 [Acropora digitifera]	0	0	0
adi2mcaRNA10485_R4	adi2mcaRNA10485_R4	0	0	XP_015756712.1	87.6	0	2046.9	>XP_015756712.1 PREDICTED: uncharacterized protein LOC107336159 [Acropora digitifera]	0	0	0
adi2mcaRNA10485_R6	adi2mcaRNA10485_R6	0	0	XP_015756712.1	68.4	0	1399.8	>XP_015756712.1 PREDICTED: uncharacterized protein LOC107336159 [Acropora digitifera]	0	0	0
adi2mcaRNA10485_R7	adi2mcaRNA10485_R7	0	0	XP_015756712.1	53.8	0	1219.1	>XP_015756712.1 PREDICTED: uncharacterized protein LOC107336159 [Acropora digitifera]	0	0	0
adi2mcaRNA10485_R8	adi2mcaRNA10485_R8	0	0	XP_015756712.1	53.9	0	1217.6	>XP_015756712.1 PREDICTED: uncharacterized protein LOC107336159 [Acropora digitifera]	0	0	0
adi2mcaRNA10485_R9	adi2mcaRNA10485_R9	0	0	XP_015756712.1	53.5	0	1206	>XP_015756712.1 PREDICTED: uncharacterized protein LOC107336159 [Acropora digitifera]	0	0	0
adi2mcaRNA10488_R0	adi2mcaRNA10488_R0	82.7601	63.2891	XP_015756714.1	65.2	2.9e-133	484.6	>XP_015756714.1 PREDICTED: uncharacterized protein YJR142W-like [Acropora digitifera]	0	GO:0016787	hydrolase activity
adi2mcaRNA1049_R0	adi2mcaRNA1049_R0	491.254	1214.72	XP_015754940.1	87.1	0	1114.8	>XP_015754940.1 PREDICTED: protein FAM91A1-like [Acropora digitifera]	0	0	0
adi2mcaRNA10492_R0	adi2mcaRNA10492_R0	158.686	122.409	XP_015756731.1	69.2	1.3e-217	765.4	>XP_015756731.1 PREDICTED: protein tyrosine phosphatase domain-containing protein 1-like [Acropora digitifera]	K18078	0	0
adi2mcaRNA10492_R1	adi2mcaRNA10492_R1	74.8462	76.3176	XP_015756731.1	68.9	5e-217	763.5	>XP_015756731.1 PREDICTED: protein tyrosine phosphatase domain-containing protein 1-like [Acropora digitifera]	K18078	0	0
adi2mcaRNA10499_R0	adi2mcaRNA10499_R0	0	0	XP_015756717.1	89.2	4.6e-232	813.1	>XP_015756717.1 PREDICTED: uncharacterized protein LOC107336165 [Acropora digitifera]	0	0	0
adi2mcaRNA10499_R1	adi2mcaRNA10499_R1	0	0	XP_015756717.1	88.8	4.3e-230	806.6	>XP_015756717.1 PREDICTED: uncharacterized protein LOC107336165 [Acropora digitifera]	0	0	0
adi2mcaRNA10499_R2	adi2mcaRNA10499_R2	0	0	XP_015756717.1	88.5	1.8e-228	801.2	>XP_015756717.1 PREDICTED: uncharacterized protein LOC107336165 [Acropora digitifera]	0	0	0
adi2mcaRNA10499_R3	adi2mcaRNA10499_R3	0	0	XP_015756717.1	86.8	7.2e-222	779.2	>XP_015756717.1 PREDICTED: uncharacterized protein LOC107336165 [Acropora digitifera]	0	0	0
adi2mcaRNA10499_R4	adi2mcaRNA10499_R4	0	0	XP_015756717.1	84.6	1.5e-216	761.5	>XP_015756717.1 PREDICTED: uncharacterized protein LOC107336165 [Acropora digitifera]	0	0	0
adi2mcaRNA10499_R5	adi2mcaRNA10499_R5	0	0	XP_015756717.1	68.7	2.4e-161	578.2	>XP_015756717.1 PREDICTED: uncharacterized protein LOC107336165 [Acropora digitifera]	0	0	0
adi2mcaRNA10499_R6	adi2mcaRNA10499_R6	0	0	XP_015756717.1	68.7	3.2e-161	577.8	>XP_015756717.1 PREDICTED: uncharacterized protein LOC107336165 [Acropora digitifera]	0	0	0
adi2mcaRNA10499_R7	adi2mcaRNA10499_R7	0	0	XP_015756717.1	68.2	7.8e-160	573.2	>XP_015756717.1 PREDICTED: uncharacterized protein LOC107336165 [Acropora digitifera]	0	0	0
adi2mcaRNA10499_R8	adi2mcaRNA10499_R8	0	0	XP_015756717.1	67.5	3.9e-156	560.8	>XP_015756717.1 PREDICTED: uncharacterized protein LOC107336165 [Acropora digitifera]	0	0	0
adi2mcaRNA10499_R9	adi2mcaRNA10499_R9	0	0	XP_015756717.1	67.1	4.5e-154	553.9	>XP_015756717.1 PREDICTED: uncharacterized protein LOC107336165 [Acropora digitifera]	0	0	0
adi2mcaRNA10505_R0	adi2mcaRNA10505_R0	0	0	XP_015756736.1	73	6.3e-55	223.4	>XP_015756736.1 PREDICTED: uncharacterized protein LOC107336191 [Acropora digitifera]	0	0	0
adi2mcaRNA10517_R1	adi2mcaRNA10517_R1	6.8758	10.4805	XP_015756741.1	58.6	3.5e-86	328.6	>XP_015756741.1 PREDICTED: transmembrane and TPR repeat-containing protein 2-like [Acropora digitifera]	K23424	0	0
adi2mcaRNA10524_R0	adi2mcaRNA10524_R0	255.827	510.334	XP_015756772.1	74.5	1.3e-123	452.2	>XP_015756772.1 PREDICTED: cystinosin homolog [Acropora digitifera]	K12386	GO:0005774;GO:0015184;GO:0015811	vacuolar membrane;L-cystine transmembrane transporter activity;L-cystine transport
adi2mcaRNA10557_R0	adi2mcaRNA10557_R0	6.25192	13.0215	XP_015756794.1	82.8	6.8e-159	569.7	>XP_015756794.1 PREDICTED: neuropeptide FF receptor 2-like isoform X1 [Acropora digitifera]	0	GO:0004930;GO:0005887;GO:0007186;GO:0032870;GO:0042277	G protein-coupled receptor activity;integral component of plasma membrane;G protein-coupled receptor signaling pathway;cellular response to hormone stimulus;peptide binding
adi2mcaRNA10569_R0	adi2mcaRNA10569_R0	0	0	XP_015756802.1	69.1	1.8e-60	241.9	>XP_015756802.1 PREDICTED: phospholipase A2 A2-actitoxin-Cgg2a-like isoform X2 [Acropora digitifera]	K01047	GO:0016787;GO:0071704	hydrolase activity;organic substance metabolic process
adi2mcaRNA10569_R2	adi2mcaRNA10569_R2	0	0	XP_015756807.1	64.8	1.2e-45	192.6	>XP_015756807.1 PREDICTED: basic phospholipase A2 nigroxin B-like [Acropora digitifera]	K01047	GO:0016787	hydrolase activity
adi2mcaRNA10572_R0	adi2mcaRNA10572_R0	9.2456	0	XP_015756807.1	69.9	2.4e-66	261.2	>XP_015756807.1 PREDICTED: basic phospholipase A2 nigroxin B-like [Acropora digitifera]	K01047	GO:0016787	hydrolase activity
adi2mcaRNA10579_R0	adi2mcaRNA10579_R0	199.719	270.674	XP_015756755.1	72.5	9.9e-180	639	>XP_015756755.1 PREDICTED: transcriptional enhancer factor TEF-3-like [Acropora digitifera]	K09448	0	0
adi2mcaRNA10592_R8	adi2mcaRNA10592_R8	0	0	XP_015756757.1	92.6	2.3e-161	578.2	>XP_015756757.1 PREDICTED: uncharacterized protein LOC107336213 [Acropora digitifera]	0	GO:0005488	binding
adi2mcaRNA10599_R1	adi2mcaRNA10599_R1	38.7098	51.1114	XP_015756825.1	71.6	4e-104	387.9	>XP_015756825.1 PREDICTED: hsp90 co-chaperone Cdc37-like [Acropora digitifera]	K09554	GO:0005737;GO:0006457;GO:0019901;GO:0031072;GO:0050821;GO:0051082;GO:0051087	cytoplasm;protein folding;protein kinase binding;heat shock protein binding;protein stabilization;unfolded protein binding;chaperone binding
adi2mcaRNA106_R0	adi2mcaRNA106_R0	93.1479	53.2676	XP_015762120.1	77.6	7.6e-43	183.3	>XP_015762120.1 PREDICTED: uncharacterized protein LOC107341192 [Acropora digitifera]	0	0	0
adi2mcaRNA10614_R0	adi2mcaRNA10614_R0	2043.83	2769.52	XP_015756761.1	55.4	1.2e-193	686	>XP_015756761.1 PREDICTED: WD repeat-containing protein 91-like [Acropora digitifera]	0	0	0
adi2mcaRNA10621_R0	adi2mcaRNA10621_R0	90.5931	57.9069	XP_015756853.1	68.9	3.5e-60	241.5	>XP_015756853.1 PREDICTED: protein FRA10AC1 homolog isoform X1 [Acropora digitifera]	K13121	0	0
adi2mcaRNA10629_R0	adi2mcaRNA10629_R0	7.02267	27.5132	XP_015756859.1	73.1	3.7e-194	687.2	>XP_015756859.1 PREDICTED: cytosolic purine 5'-nucleotidase-like isoform X4 [Acropora digitifera]	0	GO:0008253;GO:0046872	5'-nucleotidase activity;metal ion binding
adi2mcaRNA10631_R0	adi2mcaRNA10631_R0	43.9278	46.511	XP_015756845.1	60.3	2.2e-188	668.3	>XP_015756845.1 PREDICTED: fibroblast growth factor receptor 3-like [Acropora digitifera]	0	GO:0009987;GO:0016301	cellular process;kinase activity
adi2mcaRNA10632_R0	adi2mcaRNA10632_R0	0	0	XP_015756846.1	89.4	1.1e-172	615.5	>XP_015756846.1 PREDICTED: uncharacterized protein K02A2.6-like [Acropora digitifera]	0	GO:0003676;GO:0015074	nucleic acid binding;DNA integration
adi2mcaRNA10632_R4	adi2mcaRNA10632_R4	0	0	XP_015756846.1	83.8	3.6e-157	563.9	>XP_015756846.1 PREDICTED: uncharacterized protein K02A2.6-like [Acropora digitifera]	0	GO:0003676;GO:0015074	nucleic acid binding;DNA integration
adi2mcaRNA10632_R7	adi2mcaRNA10632_R7	0	0	XP_015756846.1	81.4	2.5e-124	454.5	>XP_015756846.1 PREDICTED: uncharacterized protein K02A2.6-like [Acropora digitifera]	0	GO:0003676;GO:0015074	nucleic acid binding;DNA integration
adi2mcaRNA10632_R8	adi2mcaRNA10632_R8	0	0	XP_015756846.1	75.2	1.6e-129	471.9	>XP_015756846.1 PREDICTED: uncharacterized protein K02A2.6-like [Acropora digitifera]	0	GO:0005488	binding
adi2mcaRNA10633_R0	adi2mcaRNA10633_R0	0	0	XP_015756847.1	85.7	1.3e-245	858.2	>XP_015756847.1 PREDICTED: uncharacterized protein K02A2.6-like [Acropora digitifera]	K07497	0	0
adi2mcaRNA10633_R1	adi2mcaRNA10633_R1	0	0	XP_015756847.1	85.3	2.9e-245	857.1	>XP_015756847.1 PREDICTED: uncharacterized protein K02A2.6-like [Acropora digitifera]	K07497	0	0
adi2mcaRNA10633_R8	adi2mcaRNA10633_R8	0	0	XP_015756847.1	72.2	8.3e-196	692.6	>XP_015756847.1 PREDICTED: uncharacterized protein K02A2.6-like [Acropora digitifera]	0	0	0
adi2mcaRNA10635_R0	adi2mcaRNA10635_R0	3.42011	9.49653	XP_015756863.1	73.4	0	1262.7	>XP_015756863.1 PREDICTED: fibroblast growth factor receptor 2-like isoform X1 [Acropora digitifera]	0	GO:0004714;GO:0005524;GO:0005887;GO:0007169;GO:0007275;GO:0018108;GO:0033674;GO:0043235	transmembrane receptor protein tyrosine kinase activity;ATP binding;integral component of plasma membrane;transmembrane receptor protein tyrosine kinase signaling pathway;multicellular organism development;peptidyl-tyrosine phosphorylation;positive regulation of kinase activity;receptor complex
adi2mcaRNA10635_R1	adi2mcaRNA10635_R1	0	0	XP_020606914.1	60.1	1e-252	882.5	>XP_020606914.1 fibroblast growth factor receptor 2-like isoform X4 [Orbicella faveolata]	0	GO:0004714;GO:0005887;GO:0007169;GO:0007275;GO:0033674;GO:0043235	transmembrane receptor protein tyrosine kinase activity;integral component of plasma membrane;transmembrane receptor protein tyrosine kinase signaling pathway;multicellular organism development;positive regulation of kinase activity;receptor complex
adi2mcaRNA10638_R3	adi2mcaRNA10638_R3	0	0	XP_015756848.1	77	1.5e-73	286.6	>XP_015756848.1 PREDICTED: fibroblast growth factor receptor 2-like [Acropora digitifera]	0	GO:0006464;GO:0006796;GO:0016301;GO:0016787;GO:0140096	cellular protein modification process;phosphate-containing compound metabolic process;kinase activity;hydrolase activity;catalytic activity, acting on a protein
adi2mcaRNA10638_R4	adi2mcaRNA10638_R4	0	0	KXJ26040.1	57.4	6.2e-130	474.2	>KXJ26040.1 LINE-1 reverse transcriptase-like [Exaiptasia pallida]	0	GO:0006796;GO:0140096	phosphate-containing compound metabolic process;catalytic activity, acting on a protein
adi2mcaRNA1064_R1	adi2mcaRNA1064_R1	36.7352	78.4825	XP_001641089.1	71.9	1.7e-249	871.3	>XP_001641089.1 predicted protein [Nematostella vectensis]	K07151	GO:0004579;GO:0006516;GO:0018279;GO:0030433;GO:0034998;GO:0034999;GO:0043686;GO:0043687	dolichyl-diphosphooligosaccharide-protein glycotransferase activity;glycoprotein catabolic process;protein N-linked glycosylation via asparagine;ubiquitin-dependent ERAD pathway;oligosaccharyltransferase I complex;oligosaccharyltransferase II complex;co-translational protein modification;post-translational protein modification
adi2mcaRNA10655_R0	adi2mcaRNA10655_R0	23.1382	71.2244	XP_015756886.1	48.4	4.5e-36	160.6	>XP_015756886.1 PREDICTED: fibroblast growth factor 18-like [Acropora digitifera]	0	0	0
adi2mcaRNA10664_R0	adi2mcaRNA10664_R0	116.454	40.9293	XP_015756890.1	59.8	9e-77	296.6	>XP_015756890.1 PREDICTED: tetratricopeptide repeat protein 1-like [Acropora digitifera]	0	0	0
adi2mcaRNA10665_R4	adi2mcaRNA10665_R4	0	0	XP_020606899.1	55.8	8.5e-50	206.8	>XP_020606899.1 probable G-protein coupled receptor 157 [Orbicella faveolata]	K08467	0	0
adi2mcaRNA10665_R5	adi2mcaRNA10665_R5	0	0	XP_020606899.1	55.8	8.5e-50	206.8	>XP_020606899.1 probable G-protein coupled receptor 157 [Orbicella faveolata]	K08467	0	0
adi2mcaRNA10668_R0	adi2mcaRNA10668_R0	0	5.91238	XP_015756892.1	84.3	2.4e-100	374.8	>XP_015756892.1 PREDICTED: uncharacterized protein LOC107336324 [Acropora digitifera]	0	0	0
adi2mcaRNA10668_R1	adi2mcaRNA10668_R1	0	0	XP_015756892.1	74.7	2.3e-81	311.6	>XP_015756892.1 PREDICTED: uncharacterized protein LOC107336324 [Acropora digitifera]	0	0	0
adi2mcaRNA10668_R2	adi2mcaRNA10668_R2	0	0	XP_015756892.1	76	2.9e-84	321.2	>XP_015756892.1 PREDICTED: uncharacterized protein LOC107336324 [Acropora digitifera]	0	0	0
adi2mcaRNA10676_R0	adi2mcaRNA10676_R0	0	12.9204	XP_015756895.1	84	8.6e-162	579.3	>XP_015756895.1 PREDICTED: CAAX prenyl protease 1 homolog [Acropora digitifera]	K06013	GO:0005789;GO:0006508;GO:0008237;GO:0016021	endoplasmic reticulum membrane;proteolysis;metallopeptidase activity;integral component of membrane
adi2mcaRNA10681_R1	adi2mcaRNA10681_R1	6.02165	6.32743	XP_015756896.1	58.7	0	1926.4	>XP_015756896.1 PREDICTED: nucleolar pre-ribosomal-associated protein 1-like [Acropora digitifera]	K14861	0	0
adi2mcaRNA10685_R0	adi2mcaRNA10685_R0	2372.95	3299.81	XP_015756899.1	49.5	6.1e-61	244.2	>XP_015756899.1 PREDICTED: uncharacterized protein LOC107336331 [Acropora digitifera]	0	0	0
adi2mcaRNA10691_R1	adi2mcaRNA10691_R1	0	0	XP_015776455.1	65.4	5.4e-155	558.1	>XP_015776455.1 PREDICTED: tetratricopeptide repeat protein 28-like [Acropora digitifera]	0	0	0
adi2mcaRNA10691_R2	adi2mcaRNA10691_R2	0.831281	0.320332	XP_015776455.1	65.1	4.9e-159	571.6	>XP_015776455.1 PREDICTED: tetratricopeptide repeat protein 28-like [Acropora digitifera]	0	0	0
adi2mcaRNA10691_R3	adi2mcaRNA10691_R3	0	0.888012	XP_015776455.1	62.3	4.9e-145	525	>XP_015776455.1 PREDICTED: tetratricopeptide repeat protein 28-like [Acropora digitifera]	0	0	0
adi2mcaRNA10691_R4	adi2mcaRNA10691_R4	0	0	XP_015776455.1	63.6	3.9e-142	515.4	>XP_015776455.1 PREDICTED: tetratricopeptide repeat protein 28-like [Acropora digitifera]	0	0	0
adi2mcaRNA10691_R7	adi2mcaRNA10691_R7	0	0	XP_015776455.1	64.2	3.4e-150	542.3	>XP_015776455.1 PREDICTED: tetratricopeptide repeat protein 28-like [Acropora digitifera]	0	0	0
adi2mcaRNA10691_R9	adi2mcaRNA10691_R9	0	1.41121	XP_015776455.1	65.6	2e-157	566.6	>XP_015776455.1 PREDICTED: tetratricopeptide repeat protein 28-like [Acropora digitifera]	0	0	0
adi2mcaRNA10692_R8	adi2mcaRNA10692_R8	0	0.336349	XP_015776455.1	65.4	2.1e-159	572.8	>XP_015776455.1 PREDICTED: tetratricopeptide repeat protein 28-like [Acropora digitifera]	0	0	0
adi2mcaRNA10697_R3	adi2mcaRNA10697_R3	0	0	PFX21889.1	66.3	3.2e-23	117.9	>PFX21889.1 hypothetical protein AWC38_SpisGene13627 [Stylophora pistillata]	K23222	0	0
adi2mcaRNA10706_R4	adi2mcaRNA10706_R4	0	0	XP_015756939.1	90.9	9.4e-19	102.8	>XP_015756939.1 PREDICTED: coiled-coil domain-containing protein 174-like isoform X6 [Acropora digitifera]	K23222	0	0
adi2mcaRNA10725_R0	adi2mcaRNA10725_R0	33.9644	7.46585	XP_015756948.1	73.4	9.9e-103	383.6	>XP_015756948.1 PREDICTED: collagen alpha-1(II) chain-like [Acropora digitifera]	0	GO:0005576	extracellular region
adi2mcaRNA10726_R0	adi2mcaRNA10726_R0	1.41542	0	XP_015756907.1	61.3	0	1306.6	>XP_015756907.1 PREDICTED: SCO-spondin-like [Acropora digitifera]	0	0	0
adi2mcaRNA10726_R1	adi2mcaRNA10726_R1	0	0	XP_020621175.1	60.4	0	1186	>XP_020621175.1 coadhesin-like [Orbicella faveolata]	0	0	0
adi2mcaRNA10726_R3	adi2mcaRNA10726_R3	2.42393	0	KXJ21074.1	47.4	3.3e-197	698.4	>KXJ21074.1 Coadhesin [Exaiptasia pallida]	0	0	0
adi2mcaRNA10726_R7	adi2mcaRNA10726_R7	4.56191	1.05475	XP_020892749.1	49	3.6e-209	738	>XP_020892749.1 SCO-spondin-like [Exaiptasia pallida]	0	0	0
adi2mcaRNA10737_R0	adi2mcaRNA10737_R0	24.9358	10.4741	XP_015756958.1	81.5	7.7e-123	449.5	>XP_015756958.1 PREDICTED: collagen alpha-1(II) chain-like [Acropora digitifera]	0	GO:0005201;GO:0005576;GO:0005581;GO:0010466;GO:0030414	extracellular matrix structural constituent;extracellular region;collagen trimer;negative regulation of peptidase activity;peptidase inhibitor activity
adi2mcaRNA10748_R0	adi2mcaRNA10748_R0	56.1916	28.391	XP_015756967.1	78.7	3.7e-111	410.6	>XP_015756967.1 PREDICTED: collagen alpha chain-like [Acropora digitifera]	0	GO:0005201;GO:0005576;GO:0005581	extracellular matrix structural constituent;extracellular region;collagen trimer
adi2mcaRNA10754_R1	adi2mcaRNA10754_R1	1.8537	0	XP_015756914.1	63.3	1.9e-72	282.7	>XP_015756914.1 PREDICTED: collagen alpha-1(XII) chain-like [Acropora digitifera]	0	0	0
adi2mcaRNA10769_R2	adi2mcaRNA10769_R2	0	0	XP_015756992.1	61.9	5.4e-59	236.9	>XP_015756992.1 PREDICTED: uncharacterized protein LOC107336432 [Acropora digitifera]	0	GO:0003676;GO:0006259	nucleic acid binding;DNA metabolic process
adi2mcaRNA1077_R0	adi2mcaRNA1077_R0	0	0	XP_015756749.1	62	8e-164	586.6	>XP_015756749.1 PREDICTED: uncharacterized protein LOC107336201 [Acropora digitifera]	0	GO:0016491	oxidoreductase activity
adi2mcaRNA10772_R4	adi2mcaRNA10772_R4	0	0	XP_015756976.1	53.5	4.8e-63	250.8	>XP_015756976.1 PREDICTED: uncharacterized protein LOC107336413 [Acropora digitifera]	0	0	0
adi2mcaRNA10772_R6	adi2mcaRNA10772_R6	0	0	XP_015756976.1	42.1	2.2e-34	155.2	>XP_015756976.1 PREDICTED: uncharacterized protein LOC107336413 [Acropora digitifera]	0	0	0
adi2mcaRNA10777_R0	adi2mcaRNA10777_R0	0	0	XP_015756977.1	91.5	8.4e-167	595.9	>XP_015756977.1 PREDICTED: uncharacterized protein LOC107336414 [Acropora digitifera]	0	0	0
adi2mcaRNA10777_R1	adi2mcaRNA10777_R1	0	0	XP_015756977.1	91.2	3.2e-166	594	>XP_015756977.1 PREDICTED: uncharacterized protein LOC107336414 [Acropora digitifera]	0	0	0
adi2mcaRNA10784_R2	adi2mcaRNA10784_R2	0	0	XP_015757001.1	82.2	3.8e-10	73.2	>XP_015757001.1 PREDICTED: uncharacterized protein LOC107336442 isoform X1 [Acropora digitifera]	0	0	0
adi2mcaRNA1079_R2	adi2mcaRNA1079_R2	12.5189	5.03142	XP_015757343.1	60.8	3.4e-83	317.8	>XP_015757343.1 PREDICTED: programmed cell death protein 2-like [Acropora digitifera]	K14801	0	0
adi2mcaRNA10795_R0	adi2mcaRNA10795_R0	0	0	XP_015757013.1	85.5	1.4e-172	615.1	>XP_015757013.1 PREDICTED: L-galactose dehydrogenase-like [Acropora digitifera]	0	GO:0005829;GO:0016491;GO:0055114	cytosol;oxidoreductase activity;oxidation-reduction process
adi2mcaRNA10795_R1	adi2mcaRNA10795_R1	25.6859	40.9833	XP_015757013.1	86.1	1.7e-173	618.2	>XP_015757013.1 PREDICTED: L-galactose dehydrogenase-like [Acropora digitifera]	0	GO:0005829;GO:0016491;GO:0055114	cytosol;oxidoreductase activity;oxidation-reduction process
adi2mcaRNA10799_R1	adi2mcaRNA10799_R1	0	0	XP_015757017.1	71.2	1.3e-55	225.3	>XP_015757017.1 PREDICTED: histidine triad nucleotide-binding protein 3-like [Acropora digitifera]	0	0	0
adi2mcaRNA10800_R0	adi2mcaRNA10800_R0	2024.92	1458.1	XP_020615104.1	53.2	1e-40	176.4	>XP_020615104.1 protein CDV3 homolog A-like isoform X2 [Orbicella faveolata]	0	0	0
adi2mcaRNA10800_R1	adi2mcaRNA10800_R1	1094.15	903.643	XP_015757016.1	61.3	1.2e-13	86.3	>XP_015757016.1 PREDICTED: protein CDV3 homolog A-like [Acropora digitifera]	0	0	0
adi2mcaRNA10804_R5	adi2mcaRNA10804_R5	0	0	XP_020605030.1	71.6	2.6e-230	807.7	>XP_020605030.1 uncharacterized protein LOC110043873 [Orbicella faveolata]	0	0	0
adi2mcaRNA10805_R0	adi2mcaRNA10805_R0	0	0	XP_015757018.1	78.4	2.9e-261	910.6	>XP_015757018.1 PREDICTED: uncharacterized protein LOC107336454 isoform X1 [Acropora digitifera]	0	0	0
adi2mcaRNA10809_R0	adi2mcaRNA10809_R0	4328.35	2523.54	XP_015756979.1	91	6e-63	249.6	>XP_015756979.1 PREDICTED: ATP synthase subunit d, mitochondrial-like [Acropora digitifera]	K02138	GO:0000276;GO:0006811;GO:0015078	mitochondrial proton-transporting ATP synthase complex, coupling factor F(o);ion transport;proton transmembrane transporter activity
adi2mcaRNA10815_R8	adi2mcaRNA10815_R8	0	0	XP_015761499.1	57.4	2.8e-77	298.1	>XP_015761499.1 PREDICTED: uncharacterized protein LOC107340643 [Acropora digitifera]	0	GO:0003824;GO:0008152	catalytic activity;metabolic process
adi2mcaRNA10816_R1	adi2mcaRNA10816_R1	0	0	XP_015756991.1	90.7	4.3e-96	360.1	>XP_015756991.1 PREDICTED: G2/M phase-specific E3 ubiquitin-protein ligase-like [Acropora digitifera]	K22371	0	0
adi2mcaRNA10817_R0	adi2mcaRNA10817_R0	0	0	XP_015756989.1	83.8	1.2e-182	648.7	>XP_015756989.1 PREDICTED: uncharacterized protein LOC107336429 [Acropora digitifera]	0	0	0
adi2mcaRNA10817_R1	adi2mcaRNA10817_R1	0	0	XP_015756989.1	79.8	3e-170	607.4	>XP_015756989.1 PREDICTED: uncharacterized protein LOC107336429 [Acropora digitifera]	0	0	0
adi2mcaRNA10817_R2	adi2mcaRNA10817_R2	0	0	XP_015756989.1	76.4	2.3e-157	564.7	>XP_015756989.1 PREDICTED: uncharacterized protein LOC107336429 [Acropora digitifera]	0	0	0
adi2mcaRNA10822_R2	adi2mcaRNA10822_R2	0	0	XP_015756986.1	77.5	0	1112.4	>XP_015756986.1 PREDICTED: uncharacterized protein LOC107336424 [Acropora digitifera]	0	0	0
adi2mcaRNA10825_R0	adi2mcaRNA10825_R0	0	0	XP_015756988.1	85.9	2.8e-135	491.1	>XP_015756988.1 PREDICTED: uncharacterized protein LOC107336427 [Acropora digitifera]	0	GO:0008152;GO:0016491;GO:0046872	metabolic process;oxidoreductase activity;metal ion binding
adi2mcaRNA10825_R1	adi2mcaRNA10825_R1	0	0	XP_015756988.1	86.3	1.1e-134	489.2	>XP_015756988.1 PREDICTED: uncharacterized protein LOC107336427 [Acropora digitifera]	0	GO:0003824;GO:0016020	catalytic activity;membrane
adi2mcaRNA10825_R2	adi2mcaRNA10825_R2	0	0	XP_015756988.1	88	3.1e-139	504.6	>XP_015756988.1 PREDICTED: uncharacterized protein LOC107336427 [Acropora digitifera]	0	GO:0003824;GO:0016020	catalytic activity;membrane
adi2mcaRNA10825_R4	adi2mcaRNA10825_R4	0	0	XP_015756988.1	81.8	5.9e-126	460.3	>XP_015756988.1 PREDICTED: uncharacterized protein LOC107336427 [Acropora digitifera]	0	GO:0003824;GO:0016020	catalytic activity;membrane
adi2mcaRNA10825_R8	adi2mcaRNA10825_R8	0	0	XP_015753858.1	58	4.8e-155	557.4	>XP_015753858.1 PREDICTED: RNA-directed DNA polymerase from mobile element jockey-like [Acropora digitifera]	0	GO:0008152;GO:0016740	metabolic process;transferase activity
adi2mcaRNA10825_R9	adi2mcaRNA10825_R9	0	0	XP_015756988.1	73.5	2.1e-106	394.8	>XP_015756988.1 PREDICTED: uncharacterized protein LOC107336427 [Acropora digitifera]	0	GO:0003824	catalytic activity
adi2mcaRNA10829_R2	adi2mcaRNA10829_R2	13.915	5.04846	XP_015757047.1	39.3	1e-56	229.9	>XP_015757047.1 PREDICTED: uncharacterized protein LOC107336490 [Acropora digitifera]	0	0	0
adi2mcaRNA10838_R8	adi2mcaRNA10838_R8	0	0	XP_020616969.1	58.9	8.3e-106	394	>XP_020616969.1 uncharacterized protein LOC110054933 [Orbicella faveolata]	0	0	0
adi2mcaRNA10858_R1	adi2mcaRNA10858_R1	10.6868	10.4384	XP_015757065.1	54	5.9e-38	167.2	>XP_015757065.1 PREDICTED: uncharacterized protein LOC107336505 isoform X4 [Acropora digitifera]	0	0	0
adi2mcaRNA10858_R7	adi2mcaRNA10858_R7	12.1478	0	XP_015758999.1	53.3	3.6e-32	147.9	>XP_015758999.1 PREDICTED: uncharacterized protein LOC107338284 isoform X2 [Acropora digitifera]	0	0	0
adi2mcaRNA10863_R1	adi2mcaRNA10863_R1	81.7398	18.1707	XP_022782960.1	88.4	9.6e-252	878.6	>XP_022782960.1 uncharacterized protein LOC111323791 [Stylophora pistillata]	0	0	0
adi2mcaRNA10878_R2	adi2mcaRNA10878_R2	0	5.03142	XP_015757042.1	49.1	2.2e-89	339.3	>XP_015757042.1 PREDICTED: uncharacterized protein LOC107336481 [Acropora digitifera]	0	0	0
adi2mcaRNA10879_R2	adi2mcaRNA10879_R2	0	0	XP_015757081.1	50.2	5.5e-119	437.6	>XP_015757081.1 PREDICTED: uncharacterized protein LOC107336521 isoform X2 [Acropora digitifera]	0	0	0
adi2mcaRNA10885_R4	adi2mcaRNA10885_R4	3.51481	5.6047	XP_015757081.1	49.7	2.4e-108	402.1	>XP_015757081.1 PREDICTED: uncharacterized protein LOC107336521 isoform X2 [Acropora digitifera]	0	0	0
adi2mcaRNA10885_R6	adi2mcaRNA10885_R6	0	0	XP_015757081.1	50.6	3.6e-97	364.8	>XP_015757081.1 PREDICTED: uncharacterized protein LOC107336521 isoform X2 [Acropora digitifera]	0	0	0
adi2mcaRNA10885_R7	adi2mcaRNA10885_R7	0	0	XP_015757081.1	50.6	3.6e-97	364.8	>XP_015757081.1 PREDICTED: uncharacterized protein LOC107336521 isoform X2 [Acropora digitifera]	0	0	0
adi2mcaRNA10886_R1	adi2mcaRNA10886_R1	0	0	XP_015757081.1	51.1	2.7e-121	445.3	>XP_015757081.1 PREDICTED: uncharacterized protein LOC107336521 isoform X2 [Acropora digitifera]	0	0	0
adi2mcaRNA10886_R3	adi2mcaRNA10886_R3	0	0	XP_015757081.1	48.7	2e-113	419.1	>XP_015757081.1 PREDICTED: uncharacterized protein LOC107336521 isoform X2 [Acropora digitifera]	0	0	0
adi2mcaRNA10905_R4	adi2mcaRNA10905_R4	0	0	XP_015757113.1	67.8	0	1112.8	>XP_015757113.1 PREDICTED: uncharacterized protein LOC107336557 [Acropora digitifera]	0	GO:0003676;GO:0008270	nucleic acid binding;zinc ion binding
adi2mcaRNA10905_R7	adi2mcaRNA10905_R7	82.3688	2.12484	KXJ18025.1	44.2	2.3e-162	582.4	>KXJ18025.1 hypothetical protein AC249_AIPGENE27468 [Exaiptasia pallida]	0	0	0
adi2mcaRNA10905_R8	adi2mcaRNA10905_R8	0	0	XP_015757113.1	54.3	1.6e-178	635.6	>XP_015757113.1 PREDICTED: uncharacterized protein LOC107336557 [Acropora digitifera]	0	GO:0005488	binding
adi2mcaRNA10906_R2	adi2mcaRNA10906_R2	0	0	XP_015757111.1	84.8	1e-100	375.9	>XP_015757111.1 PREDICTED: uncharacterized protein LOC107336552 [Acropora digitifera]	0	0	0
adi2mcaRNA10907_R0	adi2mcaRNA10907_R0	0	0	XP_015757091.1	72.3	1.9e-40	174.9	>XP_015757091.1 PREDICTED: uncharacterized protein LOC107336533 [Acropora digitifera]	0	0	0
adi2mcaRNA10907_R1	adi2mcaRNA10907_R1	0	0	XP_015757091.1	45.7	7e-18	100.1	>XP_015757091.1 PREDICTED: uncharacterized protein LOC107336533 [Acropora digitifera]	0	0	0
adi2mcaRNA10907_R3	adi2mcaRNA10907_R3	0	0	XP_015757091.1	39.9	5e-16	94	>XP_015757091.1 PREDICTED: uncharacterized protein LOC107336533 [Acropora digitifera]	0	0	0
adi2mcaRNA10910_R9	adi2mcaRNA10910_R9	1.6608	7.10263	XP_015757093.1	33.3	7e-66	261.2	>XP_015757093.1 PREDICTED: piggyBac transposable element-derived protein 4-like [Acropora digitifera]	0	0	0
adi2mcaRNA10914_R0	adi2mcaRNA10914_R0	0.291813	0.182125	XP_015757095.1	84.7	0	4507.6	>XP_015757095.1 PREDICTED: protein bark beetle-like [Acropora digitifera]	0	0	0
adi2mcaRNA10914_R1	adi2mcaRNA10914_R1	0	0.578514	XP_022809251.1	43.6	0	2065.8	>XP_022809251.1 uncharacterized protein LOC111346215 [Stylophora pistillata]	0	0	0
adi2mcaRNA10914_R2	adi2mcaRNA10914_R2	0	0	XP_022809251.1	43.5	0	2095.1	>XP_022809251.1 uncharacterized protein LOC111346215 [Stylophora pistillata]	0	0	0
adi2mcaRNA10916_R7	adi2mcaRNA10916_R7	0	0	XP_015757099.1	49.4	1.7e-16	95.1	>XP_015757099.1 PREDICTED: uncharacterized protein LOC107336539 [Acropora digitifera]	0	0	0
adi2mcaRNA10923_R0	adi2mcaRNA10923_R0	105.623	78.196	XP_015757101.1	74.1	7.3e-131	476.5	>XP_015757101.1 PREDICTED: pleckstrin-2-like [Acropora digitifera]	K19993	GO:0009987	cellular process
adi2mcaRNA10924_R1	adi2mcaRNA10924_R1	3.78888	21.8798	XP_015757102.1	72.4	3.7e-256	893.6	>XP_015757102.1 PREDICTED: protein asunder homolog [Acropora digitifera]	0	0	0
adi2mcaRNA10928_R0	adi2mcaRNA10928_R0	0	0	XP_015757104.1	54.5	1.3e-79	306.2	>XP_015757104.1 PREDICTED: uncharacterized protein LOC107336544 [Acropora digitifera]	0	0	0
adi2mcaRNA10928_R8	adi2mcaRNA10928_R8	8.73144	2.7593	XP_015757104.1	35.2	2.9e-55	225.7	>XP_015757104.1 PREDICTED: uncharacterized protein LOC107336544 [Acropora digitifera]	0	0	0
adi2mcaRNA10928_R9	adi2mcaRNA10928_R9	0	0	XP_015757104.1	70.6	2.6e-63	252.3	>XP_015757104.1 PREDICTED: uncharacterized protein LOC107336544 [Acropora digitifera]	0	GO:0005488	binding
adi2mcaRNA10931_R0	adi2mcaRNA10931_R0	0	0	XP_015757106.1	84.5	4.3e-152	547	>XP_015757106.1 PREDICTED: uncharacterized protein LOC107336547 [Acropora digitifera]	0	0	0
adi2mcaRNA10931_R1	adi2mcaRNA10931_R1	0	0	XP_015757106.1	86.3	3.7e-148	533.9	>XP_015757106.1 PREDICTED: uncharacterized protein LOC107336547 [Acropora digitifera]	0	0	0
adi2mcaRNA10931_R2	adi2mcaRNA10931_R2	0	0	XP_015757106.1	78.8	5.4e-136	493.4	>XP_015757106.1 PREDICTED: uncharacterized protein LOC107336547 [Acropora digitifera]	0	0	0
adi2mcaRNA10932_R0	adi2mcaRNA10932_R0	0	0	XP_015757107.1	85.9	4.9e-240	839.7	>XP_015757107.1 PREDICTED: uncharacterized protein LOC107336548 [Acropora digitifera]	0	0	0
adi2mcaRNA10932_R1	adi2mcaRNA10932_R1	0	0	XP_015757107.1	85.7	4.7e-235	823.2	>XP_015757107.1 PREDICTED: uncharacterized protein LOC107336548 [Acropora digitifera]	0	0	0
adi2mcaRNA10932_R2	adi2mcaRNA10932_R2	0	0	XP_015757107.1	82.6	1.3e-232	815.1	>XP_015757107.1 PREDICTED: uncharacterized protein LOC107336548 [Acropora digitifera]	0	0	0
adi2mcaRNA10935_R1	adi2mcaRNA10935_R1	0	0	XP_015757122.1	75	7e-278	966.1	>XP_015757122.1 PREDICTED: uncharacterized protein LOC107336568 [Acropora digitifera]	0	0	0
adi2mcaRNA10935_R6	adi2mcaRNA10935_R6	0	0	XP_015757122.1	50.3	8.5e-174	620.2	>XP_015757122.1 PREDICTED: uncharacterized protein LOC107336568 [Acropora digitifera]	0	0	0
adi2mcaRNA10935_R8	adi2mcaRNA10935_R8	0	0	XP_015757122.1	48	2e-159	572.4	>XP_015757122.1 PREDICTED: uncharacterized protein LOC107336568 [Acropora digitifera]	0	0	0
adi2mcaRNA10935_R9	adi2mcaRNA10935_R9	0	0	XP_015757122.1	46.3	3.2e-154	555.1	>XP_015757122.1 PREDICTED: uncharacterized protein LOC107336568 [Acropora digitifera]	0	0	0
adi2mcaRNA10940_R1	adi2mcaRNA10940_R1	3.03305	7.5719	XP_015757126.1	62.5	1.2e-78	302.8	>XP_015757126.1 PREDICTED: uncharacterized protein LOC107336572 [Acropora digitifera]	0	0	0
adi2mcaRNA10947_R0	adi2mcaRNA10947_R0	0	0	XP_015757142.1	39.9	1.7e-51	213	>XP_015757142.1 PREDICTED: uncharacterized protein LOC107336587 [Acropora digitifera]	0	0	0
adi2mcaRNA10957_R0	adi2mcaRNA10957_R0	283.079	259.891	XP_015757147.1	69.8	2.1e-66	261.5	>XP_015757147.1 PREDICTED: proteasome assembly chaperone 2-like [Acropora digitifera]	K11876	GO:0005634;GO:0005829;GO:0043248;GO:0050794	nucleus;cytosol;proteasome assembly;regulation of cellular process
adi2mcaRNA10959_R7	adi2mcaRNA10959_R7	0	0	XP_015757130.1	88.1	2.5e-155	557.8	>XP_015757130.1 PREDICTED: uncharacterized protein LOC107336575 [Acropora digitifera]	0	GO:0003676	nucleic acid binding
adi2mcaRNA10967_R3	adi2mcaRNA10967_R3	0	0	XP_015757156.1	60.1	1.2e-145	525.8	>XP_015757156.1 PREDICTED: uncharacterized protein LOC107336602 isoform X2 [Acropora digitifera]	0	0	0
adi2mcaRNA10967_R4	adi2mcaRNA10967_R4	3.55457	1.98322	XP_015757156.1	53.4	2.4e-140	508.4	>XP_015757156.1 PREDICTED: uncharacterized protein LOC107336602 isoform X2 [Acropora digitifera]	0	0	0
adi2mcaRNA10967_R8	adi2mcaRNA10967_R8	0	0	XP_015757155.1	51.4	3.7e-130	474.6	>XP_015757155.1 PREDICTED: uncharacterized protein LOC107336602 isoform X1 [Acropora digitifera]	0	0	0
adi2mcaRNA10967_R9	adi2mcaRNA10967_R9	0	0	XP_015757156.1	47.6	8.9e-116	426.8	>XP_015757156.1 PREDICTED: uncharacterized protein LOC107336602 isoform X2 [Acropora digitifera]	0	0	0
adi2mcaRNA10970_R0	adi2mcaRNA10970_R0	371.376	771.083	XP_015757157.1	68.7	2.1e-216	761.5	>XP_015757157.1 PREDICTED: neutral and basic amino acid transport protein rBAT-like [Acropora digitifera]	0	0	0
adi2mcaRNA10972_R4	adi2mcaRNA10972_R4	2.89875	3.61831	XP_002611875.1	61.5	7.2e-07	64.3	>XP_002611875.1 hypothetical protein BRAFLDRAFT_83101 [Branchiostoma floridae]	0	0	0
adi2mcaRNA10972_R9	adi2mcaRNA10972_R9	0	0	#N/A	#N/A	#N/A	#N/A	#N/A	0	0	0
adi2mcaRNA10974_R4	adi2mcaRNA10974_R4	0	0	XP_020623487.1	63.8	8.1e-75	291.2	>XP_020623487.1 polycystin-1-like [Orbicella faveolata]	0	GO:0016020	membrane
adi2mcaRNA10975_R9	adi2mcaRNA10975_R9	0	0	XP_002592432.1	61	2.9e-07	65.9	>XP_002592432.1 hypothetical protein BRAFLDRAFT_67299 [Branchiostoma floridae]	0	GO:0005509;GO:0007160;GO:0007275;GO:0016021;GO:0016055	calcium ion binding;cell-matrix adhesion;multicellular organism development;integral component of membrane;Wnt signaling pathway
adi2mcaRNA10989_R2	adi2mcaRNA10989_R2	0	0	XP_022792009.1	40.8	2e-34	155.6	>XP_022792009.1 uncharacterized protein LOC111331214 [Stylophora pistillata]	0	0	0
adi2mcaRNA10989_R3	adi2mcaRNA10989_R3	0	0	XP_020611010.1	32.8	1.2e-18	102.8	>XP_020611010.1 uncharacterized protein LOC110049548 [Orbicella faveolata]	0	0	0
adi2mcaRNA10989_R5	adi2mcaRNA10989_R5	0	0	XP_020611010.1	32.8	2.1e-18	102.1	>XP_020611010.1 uncharacterized protein LOC110049548 [Orbicella faveolata]	0	0	0
adi2mcaRNA10989_R8	adi2mcaRNA10989_R8	0	0	KXJ08838.1	34.6	5.6e-22	114	>KXJ08838.1 putative RNA-directed DNA polymerase from transposon BS [Exaiptasia pallida]	0	0	0
adi2mcaRNA1099_R0	adi2mcaRNA1099_R0	5.24429	0.839706	XP_015757727.1	61.9	6.2e-239	836.6	>XP_015757727.1 PREDICTED: adhesion G protein-coupled receptor L4-like [Acropora digitifera]	0	0	0
adi2mcaRNA10992_R2	adi2mcaRNA10992_R2	0	0	XP_015757174.1	80.9	3.3e-92	347.4	>XP_015757174.1 PREDICTED: putative nuclease HARBI1 [Acropora digitifera]	K23222	0	0
adi2mcaRNA11011_R0	adi2mcaRNA11011_R0	139.499	145.986	XP_015757211.1	66.4	2.2e-70	275	>XP_015757211.1 PREDICTED: transmembrane protein 69-like [Acropora digitifera]	0	GO:0016020	membrane
adi2mcaRNA11023_R1	adi2mcaRNA11023_R1	0	0	XP_015757221.1	67	1.2e-51	212.6	>XP_015757221.1 PREDICTED: UPF0746 protein DDB_G0281095-like [Acropora digitifera]	0	0	0
adi2mcaRNA11023_R2	adi2mcaRNA11023_R2	0	0	XP_015763668.1	78.6	3.4e-59	237.7	>XP_015763668.1 PREDICTED: UPF0746 protein DDB_G0281095-like [Acropora digitifera]	0	0	0
adi2mcaRNA11036_R1	adi2mcaRNA11036_R1	0	0	XP_015757226.1	38.1	5.4e-27	131	>XP_015757226.1 PREDICTED: uncharacterized protein LOC107336671 [Acropora digitifera]	0	0	0
adi2mcaRNA11036_R3	adi2mcaRNA11036_R3	0	0	XP_015757226.1	38.9	2.3e-24	122.1	>XP_015757226.1 PREDICTED: uncharacterized protein LOC107336671 [Acropora digitifera]	0	0	0
adi2mcaRNA11042_R0	adi2mcaRNA11042_R0	44.4245	123.641	XP_015757228.1	88.8	0	1084.3	>XP_015757228.1 PREDICTED: sodium- and chloride-dependent glycine transporter 2-like [Acropora digitifera]	K05048	GO:0005886;GO:0006810;GO:0015293	plasma membrane;transport;symporter activity
adi2mcaRNA11044_R0	adi2mcaRNA11044_R0	20.0918	10.1886	XP_015757193.1	85.3	3.2e-244	853.6	>XP_015757193.1 PREDICTED: paladin-like [Acropora digitifera]	0	GO:0004725;GO:0005737;GO:0035335	protein tyrosine phosphatase activity;cytoplasm;peptidyl-tyrosine dephosphorylation
adi2mcaRNA11044_R1	adi2mcaRNA11044_R1	0	0	XP_015757193.1	77.2	4.1e-99	370.5	>XP_015757193.1 PREDICTED: paladin-like [Acropora digitifera]	0	GO:0004725;GO:0005737	protein tyrosine phosphatase activity;cytoplasm
adi2mcaRNA11052_R0	adi2mcaRNA11052_R0	143.249	239.853	XP_015757236.1	89.6	0	1305.4	>XP_015757236.1 PREDICTED: cleavage stimulation factor subunit 3-like isoform X1 [Acropora digitifera]	K14408	GO:0003729;GO:0005634;GO:0006397;GO:0031123	mRNA binding;nucleus;mRNA processing;RNA 3'-end processing
adi2mcaRNA11057_R0	adi2mcaRNA11057_R0	15.2633	7.07447	XP_015757241.1	83.4	3.7e-137	497.3	>XP_015757241.1 PREDICTED: transmembrane protein 19-like [Acropora digitifera]	0	GO:0016020	membrane
adi2mcaRNA1106_R1	adi2mcaRNA1106_R1	0	0	XP_015757766.1	61.5	2.6e-107	398.3	>XP_015757766.1 PREDICTED: somatostatin receptor type 4-like [Acropora digitifera]	0	0	0
adi2mcaRNA11065_R0	adi2mcaRNA11065_R0	179.446	596.2	XP_015757197.1	84.8	0	1349.7	>XP_015757197.1 PREDICTED: carnitine O-palmitoyltransferase 1, liver isoform-like [Acropora digitifera]	0	GO:0004095;GO:0005739;GO:0006631;GO:0009437;GO:0016021	carnitine O-palmitoyltransferase activity;mitochondrion;fatty acid metabolic process;carnitine metabolic process;integral component of membrane
adi2mcaRNA11065_R1	adi2mcaRNA11065_R1	625.582	921.674	XP_015757197.1	83.6	2.3e-243	851.3	>XP_015757197.1 PREDICTED: carnitine O-palmitoyltransferase 1, liver isoform-like [Acropora digitifera]	0	GO:0004095;GO:0005739;GO:0006631;GO:0009437;GO:0016021	carnitine O-palmitoyltransferase activity;mitochondrion;fatty acid metabolic process;carnitine metabolic process;integral component of membrane
adi2mcaRNA11077_R1	adi2mcaRNA11077_R1	0	10.6723	XP_015757202.1	78.6	4.1e-95	357.8	>XP_015757202.1 PREDICTED: ankyrin repeat and MYND domain-containing protein 2-like [Acropora digitifera]	0	0	0
adi2mcaRNA11090_R0	adi2mcaRNA11090_R0	1035.54	1259.99	XP_015757207.1	90.9	0	1349	>XP_015757207.1 PREDICTED: coatomer subunit beta-like [Acropora digitifera]	K17301	GO:0006888;GO:0006891;GO:0015031;GO:0030126	endoplasmic reticulum to Golgi vesicle-mediated transport;intra-Golgi vesicle-mediated transport;protein transport;COPI vesicle coat
adi2mcaRNA11091_R0	adi2mcaRNA11091_R0	35.4967	41.288	XP_015757208.1	41	2.3e-70	276.6	>XP_015757208.1 PREDICTED: low-density lipoprotein receptor-related protein 4-like [Acropora digitifera]	0	0	0
adi2mcaRNA11097_R8	adi2mcaRNA11097_R8	0.854901	0.440985	KXJ17830.1	60.7	4.5e-300	1040	>KXJ17830.1 ATP-dependent DNA helicase PIF1 [Exaiptasia pallida]	K15255	GO:0000166;GO:0004386;GO:0006259;GO:0006974;GO:0051276	nucleotide binding;helicase activity;DNA metabolic process;cellular response to DNA damage stimulus;chromosome organization
adi2mcaRNA1110_R0	adi2mcaRNA1110_R0	0.58325	1.71541	XP_015756844.1	76.4	0	2142.9	>XP_015756844.1 PREDICTED: uncharacterized protein LOC107336284 [Acropora digitifera]	0	GO:0110165	cellular anatomical entity
adi2mcaRNA11100_R4	adi2mcaRNA11100_R4	0	0	XP_015757284.1	93.7	9e-160	572.4	>XP_015757284.1 PREDICTED: uncharacterized protein LOC107336734 [Acropora digitifera]	0	0	0
adi2mcaRNA11102_R1	adi2mcaRNA11102_R1	0	0	XP_020606468.1	72.7	1.2e-119	439.1	>XP_020606468.1 uncharacterized protein LOC110045209 [Orbicella faveolata]	K21754	GO:0003677;GO:0006310;GO:0015074	DNA binding;DNA recombination;DNA integration
adi2mcaRNA11102_R2	adi2mcaRNA11102_R2	0	0	XP_015757265.1	69.4	6.7e-89	336.7	>XP_015757265.1 PREDICTED: uncharacterized protein LOC107336712 [Acropora digitifera]	K21754	GO:0003677;GO:0006310;GO:0015074	DNA binding;DNA recombination;DNA integration
adi2mcaRNA11102_R4	adi2mcaRNA11102_R4	0	0	XP_020606468.1	61.6	3.2e-89	337.8	>XP_020606468.1 uncharacterized protein LOC110045209 [Orbicella faveolata]	K21754	0	0
adi2mcaRNA11102_R5	adi2mcaRNA11102_R5	0	0	XP_015757265.1	63	6.9e-82	313.2	>XP_015757265.1 PREDICTED: uncharacterized protein LOC107336712 [Acropora digitifera]	K21754	0	0
adi2mcaRNA11102_R6	adi2mcaRNA11102_R6	0	0	XP_020627729.1	58.4	2.5e-91	344.7	>XP_020627729.1 uncharacterized protein LOC110064967 [Orbicella faveolata]	K21754	GO:0006259	DNA metabolic process
adi2mcaRNA11107_R0	adi2mcaRNA11107_R0	0	0	XP_015757270.1	80.6	2.6e-184	654.8	>XP_015757270.1 PREDICTED: uncharacterized protein LOC107336717 [Acropora digitifera]	0	0	0
adi2mcaRNA11109_R4	adi2mcaRNA11109_R4	0	0	XP_015757285.1	88.2	9.4e-44	186	>XP_015757285.1 PREDICTED: uncharacterized protein LOC107336735 [Acropora digitifera]	0	0	0
adi2mcaRNA11111_R0	adi2mcaRNA11111_R0	0	0	XP_020907531.1	51	1.7e-120	442.6	>XP_020907531.1 uncharacterized protein K02A2.6-like [Exaiptasia pallida]	0	0	0
adi2mcaRNA11111_R3	adi2mcaRNA11111_R3	0	0	XP_020907531.1	52	6.2e-137	497.3	>XP_020907531.1 uncharacterized protein K02A2.6-like [Exaiptasia pallida]	0	0	0
adi2mcaRNA11111_R4	adi2mcaRNA11111_R4	0	0	XP_020907531.1	51.9	6.2e-137	497.3	>XP_020907531.1 uncharacterized protein K02A2.6-like [Exaiptasia pallida]	0	0	0
adi2mcaRNA11111_R7	adi2mcaRNA11111_R7	0	0	XP_020907531.1	59.2	1.1e-174	622.9	>XP_020907531.1 uncharacterized protein K02A2.6-like [Exaiptasia pallida]	0	0	0
adi2mcaRNA11115_R3	adi2mcaRNA11115_R3	0	0	XP_020908366.1	40.3	4.6e-45	191.4	>XP_020908366.1 uncharacterized protein LOC110246360 [Exaiptasia pallida]	0	0	0
adi2mcaRNA11116_R0	adi2mcaRNA11116_R0	0	0	XP_015757290.1	66.1	1.2e-119	439.1	>XP_015757290.1 PREDICTED: uncharacterized protein LOC107336741 [Acropora digitifera]	0	0	0
adi2mcaRNA11116_R1	adi2mcaRNA11116_R1	0	0	XP_015757290.1	65	9.5e-120	439.5	>XP_015757290.1 PREDICTED: uncharacterized protein LOC107336741 [Acropora digitifera]	0	0	0
adi2mcaRNA11116_R2	adi2mcaRNA11116_R2	0	1.56639	XP_015757290.1	64.6	1.1e-118	436	>XP_015757290.1 PREDICTED: uncharacterized protein LOC107336741 [Acropora digitifera]	0	0	0
adi2mcaRNA11116_R3	adi2mcaRNA11116_R3	0	0	XP_015757290.1	64.9	6.8e-118	433.3	>XP_015757290.1 PREDICTED: uncharacterized protein LOC107336741 [Acropora digitifera]	0	0	0
adi2mcaRNA11116_R4	adi2mcaRNA11116_R4	80.5489	42.2956	XP_015757290.1	65.4	2.6e-117	431.4	>XP_015757290.1 PREDICTED: uncharacterized protein LOC107336741 [Acropora digitifera]	0	0	0
adi2mcaRNA11116_R5	adi2mcaRNA11116_R5	48.9869	2.92949	XP_015757290.1	64.9	2.2e-116	428.3	>XP_015757290.1 PREDICTED: uncharacterized protein LOC107336741 [Acropora digitifera]	0	0	0
adi2mcaRNA11116_R8	adi2mcaRNA11116_R8	0	0	XP_015757290.1	65.1	8.3e-116	426.4	>XP_015757290.1 PREDICTED: uncharacterized protein LOC107336741 [Acropora digitifera]	0	0	0
adi2mcaRNA11128_R4	adi2mcaRNA11128_R4	0	0	XP_015747160.1	70.6	4.3e-102	380.6	>XP_015747160.1 PREDICTED: zinc finger protein 862-like [Acropora digitifera]	0	0	0
adi2mcaRNA11128_R8	adi2mcaRNA11128_R8	0	0	XP_015757278.1	49.1	1.7e-49	205.7	>XP_015757278.1 PREDICTED: zinc finger protein 862-like [Acropora digitifera]	0	0	0
adi2mcaRNA11137_R0	adi2mcaRNA11137_R0	0	3.31763	XP_015757303.1	70.6	1.1e-160	575.9	>XP_015757303.1 PREDICTED: uncharacterized protein LOC107336751 isoform X2 [Acropora digitifera]	0	0	0
adi2mcaRNA11137_R1	adi2mcaRNA11137_R1	47.0441	234.835	XP_015757303.1	70.1	3.3e-160	574.3	>XP_015757303.1 PREDICTED: uncharacterized protein LOC107336751 isoform X2 [Acropora digitifera]	0	0	0
adi2mcaRNA11158_R0	adi2mcaRNA11158_R0	744.561	863.58	XP_020631035.1	89.8	4.6e-282	979.5	>XP_020631035.1 E3 ubiquitin-protein ligase RNF19A-like isoform X2 [Orbicella faveolata]	0	GO:0004842;GO:0016021;GO:0016567;GO:0046872	ubiquitin-protein transferase activity;integral component of membrane;protein ubiquitination;metal ion binding
adi2mcaRNA11162_R1	adi2mcaRNA11162_R1	88.6591	4.19894	#N/A	#N/A	#N/A	#N/A	#N/A	0	0	0
adi2mcaRNA11166_R0	adi2mcaRNA11166_R0	30.5552	119.671	XP_015757357.1	94.4	4.2e-23	116.3	>XP_015757357.1 PREDICTED: dynein regulatory complex protein 1-like [Acropora digitifera]	0	GO:0005858;GO:0070286	axonemal dynein complex;axonemal dynein complex assembly
adi2mcaRNA11167_R0	adi2mcaRNA11167_R0	1323.21	1161.81	XP_015757319.1	69.5	8.7e-129	469.9	>XP_015757319.1 PREDICTED: dynein regulatory complex protein 1-like [Acropora digitifera]	K19754	0	0
adi2mcaRNA11172_R1	adi2mcaRNA11172_R1	0	0	XP_015757354.1	76.1	1.2e-143	519.2	>XP_015757354.1 PREDICTED: ras-related protein RSR1-like [Acropora digitifera]	0	0	0
adi2mcaRNA11174_R0	adi2mcaRNA11174_R0	15.6489	16.5681	XP_015757359.1	75.9	0	1293.9	>XP_015757359.1 PREDICTED: metabotropic glutamate receptor 3-like [Acropora digitifera]	0	GO:0005887;GO:0007216;GO:0008066;GO:0051966	integral component of plasma membrane;G protein-coupled glutamate receptor signaling pathway;glutamate receptor activity;regulation of synaptic transmission, glutamatergic
adi2mcaRNA11174_R3	adi2mcaRNA11174_R3	0.935191	0.360374	XP_020609927.1	73.5	0	1258.4	>XP_020609927.1 metabotropic glutamate receptor 3-like isoform X1 [Orbicella faveolata]	0	GO:0005887;GO:0007216;GO:0008066;GO:0051966	integral component of plasma membrane;G protein-coupled glutamate receptor signaling pathway;glutamate receptor activity;regulation of synaptic transmission, glutamatergic
adi2mcaRNA11188_R9	adi2mcaRNA11188_R9	0	0	XP_015757326.1	98.6	6.4e-118	434.1	>XP_015757326.1 PREDICTED: aspartyl/asparaginyl beta-hydroxylase-like [Acropora digitifera]	0	GO:0003964;GO:0005044;GO:0005096;GO:0005794;GO:0006278;GO:0006897;GO:0016021;GO:0016301;GO:0016310;GO:0043547;GO:0046580	RNA-directed DNA polymerase activity;scavenger receptor activity;GTPase activator activity;Golgi apparatus;RNA-dependent DNA biosynthetic process;endocytosis;integral component of membrane;kinase activity;phosphorylation;positive regulation of GTPase activity;negative regulation of Ras protein signal transduction
adi2mcaRNA11212_R0	adi2mcaRNA11212_R0	0	0	XP_020630982.1	82	0	1342.8	>XP_020630982.1 adenylate cyclase type 3-like [Orbicella faveolata]	0	GO:0004016;GO:0005887;GO:0007189;GO:0009190;GO:0032555;GO:0035639	adenylate cyclase activity;integral component of plasma membrane;adenylate cyclase-activating G protein-coupled receptor signaling pathway;cyclic nucleotide biosynthetic process;purine ribonucleotide binding;purine ribonucleoside triphosphate binding
adi2mcaRNA11213_R0	adi2mcaRNA11213_R0	0	0	XP_015757386.1	70.6	8.4e-99	369.8	>XP_015757386.1 PREDICTED: adenylate cyclase type 3-like [Acropora digitifera]	0	GO:0003924;GO:0005525;GO:0005874;GO:0007017;GO:0009190;GO:0016021;GO:0016849;GO:0035556	GTPase activity;GTP binding;microtubule;microtubule-based process;cyclic nucleotide biosynthetic process;integral component of membrane;phosphorus-oxygen lyase activity;intracellular signal transduction
adi2mcaRNA11228_R5	adi2mcaRNA11228_R5	0.583626	0	XP_015757400.1	66	0	1588.9	>XP_015757400.1 PREDICTED: uncharacterized protein LOC107336845 [Acropora digitifera]	K15261	GO:0016757	transferase activity, transferring glycosyl groups
adi2mcaRNA11228_R6	adi2mcaRNA11228_R6	1.40234	0.391356	XP_015757400.1	64.7	0	1551.2	>XP_015757400.1 PREDICTED: uncharacterized protein LOC107336845 [Acropora digitifera]	K15261	GO:0016757	transferase activity, transferring glycosyl groups
adi2mcaRNA11228_R7	adi2mcaRNA11228_R7	0	1.39482	XP_015757400.1	57.6	2.8e-267	931.8	>XP_015757400.1 PREDICTED: uncharacterized protein LOC107336845 [Acropora digitifera]	K15261	GO:0016740	transferase activity
adi2mcaRNA11233_R0	adi2mcaRNA11233_R0	147.677	178.087	XP_015757336.1	63.7	0	2019.6	>XP_015757336.1 PREDICTED: LOW QUALITY PROTEIN: calmodulin-regulated spectrin-associated protein 1-B-like [Acropora digitifera]	K17493	GO:0005516;GO:0007026;GO:0031122;GO:0036449;GO:0051011	calmodulin binding;negative regulation of microtubule depolymerization;cytoplasmic microtubule organization;microtubule minus-end;microtubule minus-end binding
adi2mcaRNA11238_R1	adi2mcaRNA11238_R1	0	0	XP_015757415.1	68.3	1.3e-66	262.3	>XP_015757415.1 PREDICTED: interferon regulatory factor 1-like [Acropora digitifera]	0	GO:0003700;GO:0006355;GO:0008283;GO:0044212	DNA-binding transcription factor activity;regulation of transcription, DNA-templated;cell population proliferation;transcription regulatory region DNA binding
adi2mcaRNA11252_R3	adi2mcaRNA11252_R3	0	0	XP_015757421.1	69.6	3.3e-35	157.1	>XP_015757421.1 PREDICTED: uncharacterized protein LOC107336860 [Acropora digitifera]	0	0	0
adi2mcaRNA11252_R4	adi2mcaRNA11252_R4	0	0	XP_015757421.1	82.1	5.3e-41	176.8	>XP_015757421.1 PREDICTED: uncharacterized protein LOC107336860 [Acropora digitifera]	0	0	0
adi2mcaRNA1127_R2	adi2mcaRNA1127_R2	0	0	XP_015757874.1	56.4	1.4e-134	489.2	>XP_015757874.1 PREDICTED: uncharacterized protein LOC107337224 isoform X8 [Acropora digitifera]	0	0	0
adi2mcaRNA1127_R3	adi2mcaRNA1127_R3	5.16594	0	XP_015757874.1	53.9	1.1e-126	463	>XP_015757874.1 PREDICTED: uncharacterized protein LOC107337224 isoform X8 [Acropora digitifera]	0	0	0
adi2mcaRNA11287_R1	adi2mcaRNA11287_R1	5.45528	89.2074	XP_015757448.1	77.9	3.7e-50	207.2	>XP_015757448.1 PREDICTED: DNA-directed RNA polymerase III subunit RPC9-like [Acropora digitifera]	0	GO:0001056;GO:0005666;GO:0006384	RNA polymerase III activity;RNA polymerase III complex;transcription initiation from RNA polymerase III promoter
adi2mcaRNA11289_R1	adi2mcaRNA11289_R1	0	2.49369	XP_015757451.1	65.1	4e-242	847	>XP_015757451.1 PREDICTED: F-box/WD repeat-containing protein 8-like [Acropora digitifera]	K10264	GO:0005634;GO:0006807;GO:0032991;GO:0043170;GO:0044237;GO:0044238;GO:0071840	nucleus;nitrogen compound metabolic process;protein-containing complex;macromolecule metabolic process;cellular metabolic process;primary metabolic process;cellular component organization or biogenesis
adi2mcaRNA11302_R0	adi2mcaRNA11302_R0	0	0	XP_015757481.1	60	2e-136	495.7	>XP_015757481.1 PREDICTED: stress response protein NST1-like [Acropora digitifera]	0	GO:0097159;GO:1901363	organic cyclic compound binding;heterocyclic compound binding
adi2mcaRNA11302_R1	adi2mcaRNA11302_R1	0	0	XP_015757481.1	59.8	2.6e-136	495.4	>XP_015757481.1 PREDICTED: stress response protein NST1-like [Acropora digitifera]	0	GO:0097159;GO:1901363	organic cyclic compound binding;heterocyclic compound binding
adi2mcaRNA11302_R5	adi2mcaRNA11302_R5	0	0	XP_020614507.1	49.1	3.1e-134	488.4	>XP_020614507.1 uncharacterized protein LOC110052694 [Orbicella faveolata]	0	GO:0097159;GO:1901363	organic cyclic compound binding;heterocyclic compound binding
adi2mcaRNA11304_R0	adi2mcaRNA11304_R0	0	0	XP_015757462.1	78	0	1085.1	>XP_015757462.1 PREDICTED: RNA-directed DNA polymerase from mobile element jockey-like [Acropora digitifera]	0	GO:0016740	transferase activity
adi2mcaRNA11304_R1	adi2mcaRNA11304_R1	0	0.456582	XP_015757462.1	74.2	3e-280	973.8	>XP_015757462.1 PREDICTED: RNA-directed DNA polymerase from mobile element jockey-like [Acropora digitifera]	0	GO:0016740	transferase activity
adi2mcaRNA11304_R2	adi2mcaRNA11304_R2	0	0.970237	XP_015757462.1	71	2.6e-262	914.1	>XP_015757462.1 PREDICTED: RNA-directed DNA polymerase from mobile element jockey-like [Acropora digitifera]	0	GO:0003824	catalytic activity
adi2mcaRNA11304_R4	adi2mcaRNA11304_R4	0	0	XP_015757462.1	85.5	7.2e-235	822.8	>XP_015757462.1 PREDICTED: RNA-directed DNA polymerase from mobile element jockey-like [Acropora digitifera]	0	GO:0016740	transferase activity
adi2mcaRNA11304_R6	adi2mcaRNA11304_R6	0	0	PFX27831.1	58.4	1.7e-220	775.4	>PFX27831.1 TCDD-inducible poly [ADP-ribose] polymerase [Stylophora pistillata]	0	GO:0009987;GO:0016757	cellular process;transferase activity, transferring glycosyl groups
adi2mcaRNA11304_R9	adi2mcaRNA11304_R9	0	0	PFX23186.1	58.7	2.2e-220	775	>PFX23186.1 RNA-directed DNA polymerase from mobile element jockey [Stylophora pistillata]	0	GO:0009987;GO:0016757	cellular process;transferase activity, transferring glycosyl groups
adi2mcaRNA11308_R4	adi2mcaRNA11308_R4	0	0	XP_015757488.1	63.8	3.8e-76	294.3	>XP_015757488.1 PREDICTED: uncharacterized protein LOC107336919 [Acropora digitifera]	0	0	0
adi2mcaRNA11308_R5	adi2mcaRNA11308_R5	0	0	XP_015757488.1	73.7	2.5e-63	251.5	>XP_015757488.1 PREDICTED: uncharacterized protein LOC107336919 [Acropora digitifera]	0	0	0
adi2mcaRNA11308_R6	adi2mcaRNA11308_R6	0	0	XP_015757488.1	54.8	3.8e-62	247.7	>XP_015757488.1 PREDICTED: uncharacterized protein LOC107336919 [Acropora digitifera]	0	0	0
adi2mcaRNA11311_R3	adi2mcaRNA11311_R3	0	0	XP_015757489.1	49.4	1.2e-44	189.5	>XP_015757489.1 PREDICTED: uncharacterized protein LOC107336920 isoform X1 [Acropora digitifera]	0	0	0
adi2mcaRNA11313_R1	adi2mcaRNA11313_R1	2.96438	0	XP_015757495.1	51.9	4.1e-55	224.6	>XP_015757495.1 PREDICTED: uncharacterized protein LOC107336922 isoform X2 [Acropora digitifera]	0	0	0
adi2mcaRNA11313_R8	adi2mcaRNA11313_R8	0	0	XP_015757495.1	36.1	2.8e-10	75.1	>XP_015757495.1 PREDICTED: uncharacterized protein LOC107336922 isoform X2 [Acropora digitifera]	0	0	0
adi2mcaRNA11315_R2	adi2mcaRNA11315_R2	0	2.80947	XP_015757493.1	46.8	4.1e-50	208	>XP_015757493.1 PREDICTED: uncharacterized protein LOC107336922 isoform X1 [Acropora digitifera]	0	0	0
adi2mcaRNA11316_R0	adi2mcaRNA11316_R0	73.4014	161.091	XP_015757495.1	49.8	1.2e-49	206.5	>XP_015757495.1 PREDICTED: uncharacterized protein LOC107336922 isoform X2 [Acropora digitifera]	0	0	0
adi2mcaRNA1132_R1	adi2mcaRNA1132_R1	178.733	269.342	XP_015757888.1	67.7	3.9e-192	680.6	>XP_015757888.1 PREDICTED: cholesterol 24-hydroxylase-like [Acropora digitifera]	K07440	GO:0005488;GO:0016491	binding;oxidoreductase activity
adi2mcaRNA11330_R3	adi2mcaRNA11330_R3	0	0	XP_015757512.1	64.8	4.8e-57	230.7	>XP_015757512.1 PREDICTED: uncharacterized protein LOC107336929 [Acropora digitifera]	0	0	0
adi2mcaRNA11354_R4	adi2mcaRNA11354_R4	0	0	XP_015757518.1	69.7	4.1e-134	487.3	>XP_015757518.1 PREDICTED: uromodulin-like isoform X1 [Acropora digitifera]	0	0	0
adi2mcaRNA11357_R3	adi2mcaRNA11357_R3	0	0	XP_015757472.1	69.7	1.3e-135	492.3	>XP_015757472.1 PREDICTED: uromodulin-like [Acropora digitifera]	0	0	0
adi2mcaRNA1136_R0	adi2mcaRNA1136_R0	5.2868	2.74197	XP_015756947.1	52.5	2.8e-167	598.2	>XP_015756947.1 PREDICTED: uncharacterized protein LOC107336373 [Acropora digitifera]	0	0	0
adi2mcaRNA11361_R0	adi2mcaRNA11361_R0	0	0	XP_015757475.1	57.6	5.3e-215	756.9	>XP_015757475.1 PREDICTED: multiple epidermal growth factor-like domains protein 6 [Acropora digitifera]	0	0	0
adi2mcaRNA11361_R1	adi2mcaRNA11361_R1	0	0	XP_015757475.1	48.5	1e-166	596.3	>XP_015757475.1 PREDICTED: multiple epidermal growth factor-like domains protein 6 [Acropora digitifera]	0	0	0
adi2mcaRNA11370_R3	adi2mcaRNA11370_R3	0	1.34692	XP_015757530.1	69.4	1.6e-126	462.2	>XP_015757530.1 PREDICTED: uromodulin-like isoform X2 [Acropora digitifera]	0	0	0
adi2mcaRNA11370_R5	adi2mcaRNA11370_R5	0	0	XP_015757529.1	71.1	1.6e-126	462.2	>XP_015757529.1 PREDICTED: uromodulin-like isoform X1 [Acropora digitifera]	0	0	0
adi2mcaRNA11372_R7	adi2mcaRNA11372_R7	0	0	XP_022797969.1	61.5	1.5e-88	335.9	>XP_022797969.1 uromodulin-like [Stylophora pistillata]	0	0	0
adi2mcaRNA11392_R0	adi2mcaRNA11392_R0	0	1.19413	XP_015757551.1	54.9	1.3e-182	649.4	>XP_015757551.1 PREDICTED: stimulated by retinoic acid gene 6 protein homolog isoform X3 [Acropora digitifera]	K23088	0	0
adi2mcaRNA11393_R1	adi2mcaRNA11393_R1	1.44404	0.55646	XP_015757550.1	52	6.7e-161	577	>XP_015757550.1 PREDICTED: stimulated by retinoic acid gene 6 protein homolog isoform X2 [Acropora digitifera]	K23088	0	0
adi2mcaRNA11403_R0	adi2mcaRNA11403_R0	110.48	72.5802	XP_015757558.1	77	4.3e-285	989.9	>XP_015757558.1 PREDICTED: kinesin-like protein KIF27 [Acropora digitifera]	0	GO:0003777;GO:0005524;GO:0005871;GO:0005874;GO:0007018;GO:0008017;GO:0016887	microtubule motor activity;ATP binding;kinesin complex;microtubule;microtubule-based movement;microtubule binding;ATPase activity
adi2mcaRNA11407_R0	adi2mcaRNA11407_R0	515.273	281.277	XP_015757594.1	64	3.6e-89	339	>XP_015757594.1 PREDICTED: zinc finger CCCH domain-containing protein 6-like [Acropora digitifera]	K23573	GO:0005216;GO:0016020	ion channel activity;membrane
adi2mcaRNA11411_R3	adi2mcaRNA11411_R3	0	10.6354	XP_015757560.1	56.7	3.5e-54	221.5	>XP_015757560.1 PREDICTED: beta-1 adrenergic receptor-like [Acropora digitifera]	0	0	0
adi2mcaRNA11414_R1	adi2mcaRNA11414_R1	0	0	XP_015757586.1	63.6	7.3e-96	360.1	>XP_015757586.1 PREDICTED: histamine H2 receptor-like [Acropora digitifera]	0	0	0
adi2mcaRNA11417_R3	adi2mcaRNA11417_R3	0	0	XP_015757563.1	90.2	0	1361.3	>XP_015757563.1 PREDICTED: uncharacterized protein K02A2.6-like [Acropora digitifera]	0	GO:0006807;GO:0044238;GO:0044260	nitrogen compound metabolic process;primary metabolic process;cellular macromolecule metabolic process
adi2mcaRNA11417_R4	adi2mcaRNA11417_R4	0	0	XP_015757563.1	90.2	0	1358.6	>XP_015757563.1 PREDICTED: uncharacterized protein K02A2.6-like [Acropora digitifera]	0	GO:0006807;GO:0044238;GO:0044260	nitrogen compound metabolic process;primary metabolic process;cellular macromolecule metabolic process
adi2mcaRNA11417_R6	adi2mcaRNA11417_R6	0	0	XP_015757563.1	89.5	0	1350.5	>XP_015757563.1 PREDICTED: uncharacterized protein K02A2.6-like [Acropora digitifera]	0	GO:0006807;GO:0044238;GO:0044260	nitrogen compound metabolic process;primary metabolic process;cellular macromolecule metabolic process
adi2mcaRNA11417_R7	adi2mcaRNA11417_R7	0	0	XP_015757563.1	89.4	0	1301.6	>XP_015757563.1 PREDICTED: uncharacterized protein K02A2.6-like [Acropora digitifera]	0	GO:0006807;GO:0044238;GO:0044260	nitrogen compound metabolic process;primary metabolic process;cellular macromolecule metabolic process
adi2mcaRNA11417_R9	adi2mcaRNA11417_R9	0	0	XP_015757563.1	93.2	0	1375.1	>XP_015757563.1 PREDICTED: uncharacterized protein K02A2.6-like [Acropora digitifera]	0	GO:0006807;GO:0044238;GO:0044260	nitrogen compound metabolic process;primary metabolic process;cellular macromolecule metabolic process
adi2mcaRNA11420_R0	adi2mcaRNA11420_R0	0	0	XP_015757609.1	77.3	6.2e-114	420.2	>XP_015757609.1 PREDICTED: histamine H2 receptor-like isoform X2 [Acropora digitifera]	0	0	0
adi2mcaRNA11423_R2	adi2mcaRNA11423_R2	99.6609	181.234	XP_020609272.1	92.6	6.3e-258	899.8	>XP_020609272.1 guanylate-binding protein 6-like [Orbicella faveolata]	K20899	0	0
adi2mcaRNA11426_R5	adi2mcaRNA11426_R5	0	4.60417	XP_020609279.1	82.7	1.1e-245	858.6	>XP_020609279.1 guanylate-binding protein 7-like [Orbicella faveolata]	K20899	0	0
adi2mcaRNA11434_R0	adi2mcaRNA11434_R0	366.63	653.136	XP_015757567.1	59	6.6e-181	643.7	>XP_015757567.1 PREDICTED: PAX-interacting protein 1-like [Acropora digitifera]	0	0	0
adi2mcaRNA11436_R1	adi2mcaRNA11436_R1	0	1.85712	XP_015757612.1	69.5	2.4e-95	358.2	>XP_015757612.1 PREDICTED: uncharacterized protein LOC107337014 [Acropora digitifera]	0	0	0
adi2mcaRNA11437_R1	adi2mcaRNA11437_R1	16.2629	19.8608	XP_015757568.1	56.1	5.7e-294	1020.4	>XP_015757568.1 PREDICTED: uncharacterized protein LOC107336976 [Acropora digitifera]	0	0	0
adi2mcaRNA1144_R0	adi2mcaRNA1144_R0	3562.79	3842.97	XP_022801936.1	76.9	8.1e-185	656.4	>XP_022801936.1 basal body-orientation factor 1-like [Stylophora pistillata]	0	0	0
adi2mcaRNA11440_R1	adi2mcaRNA11440_R1	158.32	147.13	XP_015757570.1	69.5	1.2e-160	575.5	>XP_015757570.1 PREDICTED: L-gulonolactone oxidase-like [Acropora digitifera]	0	GO:0016020;GO:0016899;GO:0043227	membrane;oxidoreductase activity, acting on the CH-OH group of donors, oxygen as acceptor;membrane-bounded organelle
adi2mcaRNA11453_R0	adi2mcaRNA11453_R0	0	0	XP_015757575.1	71	1.2e-184	655.6	>XP_015757575.1 PREDICTED: cytochrome b561 and DOMON domain-containing protein At3g25290-like [Acropora digitifera]	0	0	0
adi2mcaRNA11453_R1	adi2mcaRNA11453_R1	0	0	XP_015757575.1	65.7	1.1e-123	452.6	>XP_015757575.1 PREDICTED: cytochrome b561 and DOMON domain-containing protein At3g25290-like [Acropora digitifera]	0	0	0
adi2mcaRNA11454_R7	adi2mcaRNA11454_R7	0	0	XP_015757621.1	47.3	2.4e-65	258.8	>XP_015757621.1 PREDICTED: beta-2 adrenergic receptor-like [Acropora digitifera]	0	0	0
adi2mcaRNA11463_R0	adi2mcaRNA11463_R0	38.0427	63.9766	XP_015757629.1	86.1	1.8e-70	275	>XP_015757629.1 PREDICTED: EF-hand calcium-binding domain-containing protein 4B-like isoform X2 [Acropora digitifera]	0	GO:0003924;GO:0005509;GO:0005525	GTPase activity;calcium ion binding;GTP binding
adi2mcaRNA11477_R1	adi2mcaRNA11477_R1	21.0675	9.81122	XP_015757579.1	85.7	0	1446.4	>XP_015757579.1 PREDICTED: DNA-directed RNA polymerase III subunit RPC2-like [Acropora digitifera]	0	GO:0006351;GO:0016779;GO:0048518;GO:0055123;GO:0097159;GO:1901363	transcription, DNA-templated;nucleotidyltransferase activity;positive regulation of biological process;digestive system development;organic cyclic compound binding;heterocyclic compound binding
adi2mcaRNA11479_R0	adi2mcaRNA11479_R0	353.934	394.772	XP_015757581.1	81.8	0	3433.7	>XP_015757581.1 PREDICTED: lipoxygenase homology domain-containing protein 1-like [Acropora digitifera]	0	0	0
adi2mcaRNA11498_R1	adi2mcaRNA11498_R1	71.108	2.884	XP_022792435.1	81.9	6e-76	293.1	>XP_022792435.1 U3 small nucleolar ribonucleoprotein protein IMP3-like [Stylophora pistillata]	K14560	GO:0006364;GO:0015935;GO:0019843;GO:0030515;GO:0032040;GO:0034457	rRNA processing;small ribosomal subunit;rRNA binding;snoRNA binding;small-subunit processome;Mpp10 complex
adi2mcaRNA11510_R1	adi2mcaRNA11510_R1	0	0	XP_015757652.1	77.7	0	1105.1	>XP_015757652.1 PREDICTED: fibrillin-2-like [Acropora digitifera]	0	0	0
adi2mcaRNA11533_R1	adi2mcaRNA11533_R1	35.6477	35.1095	XP_015757696.1	83.3	2.2e-99	371.3	>XP_015757696.1 PREDICTED: WD repeat-containing protein 41-like [Acropora digitifera]	K23610	GO:0010506	regulation of autophagy
adi2mcaRNA11548_R0	adi2mcaRNA11548_R0	6.18949	0	XP_015757705.1	77.8	5.9e-202	713.8	>XP_015757705.1 PREDICTED: fibropellin-1-like isoform X1 [Acropora digitifera]	0	GO:0005509;GO:0016740;GO:0110165	calcium ion binding;transferase activity;cellular anatomical entity
adi2mcaRNA1155_R0	adi2mcaRNA1155_R0	77.6193	27.7533	XP_015758020.1	85.9	4.9e-91	343.6	>XP_015758020.1 PREDICTED: transmembrane protein 41A-like [Acropora digitifera]	0	GO:0016020	membrane
adi2mcaRNA11551_R0	adi2mcaRNA11551_R0	0	0.414961	XP_015757704.1	74.2	0	1597.4	>XP_015757704.1 PREDICTED: uncharacterized protein LOC107337099 [Acropora digitifera]	0	0	0
adi2mcaRNA11555_R0	adi2mcaRNA11555_R0	950.499	452.126	XP_020618094.1	70	1.3e-44	188.7	>XP_020618094.1 60S ribosomal protein L28-like [Orbicella faveolata]	K02903	GO:0022625	cytosolic large ribosomal subunit
adi2mcaRNA11574_R0	adi2mcaRNA11574_R0	0	0	XP_015757721.1	83.5	1e-139	505.8	>XP_015757721.1 PREDICTED: meiotic recombination protein SPO11-like [Acropora digitifera]	K10878	GO:0000228;GO:0000706;GO:0000737;GO:0003677;GO:0005524;GO:0007131;GO:0016889;GO:0042138	nuclear chromosome;meiotic DNA double-strand break processing;DNA catabolic process, endonucleolytic;DNA binding;ATP binding;reciprocal meiotic recombination;endodeoxyribonuclease activity, producing 3'-phosphomonoesters;meiotic DNA double-strand break formation
adi2mcaRNA11574_R1	adi2mcaRNA11574_R1	0	0	XP_015757721.1	83.5	7.9e-140	506.1	>XP_015757721.1 PREDICTED: meiotic recombination protein SPO11-like [Acropora digitifera]	K10878	GO:0000228;GO:0000706;GO:0000737;GO:0003677;GO:0005524;GO:0007131;GO:0016889;GO:0042138	nuclear chromosome;meiotic DNA double-strand break processing;DNA catabolic process, endonucleolytic;DNA binding;ATP binding;reciprocal meiotic recombination;endodeoxyribonuclease activity, producing 3'-phosphomonoesters;meiotic DNA double-strand break formation
adi2mcaRNA1158_R2	adi2mcaRNA1158_R2	8.71849	12.9262	XP_020630269.1	41.8	2.9e-48	202.2	>XP_020630269.1 receptor-type tyrosine-protein phosphatase F-like isoform X2 [Orbicella faveolata]	0	0	0
adi2mcaRNA1158_R5	adi2mcaRNA1158_R5	2.58239	3.13152	XP_020630270.1	34.1	1.1e-26	130.2	>XP_020630270.1 receptor-type tyrosine-protein phosphatase F-like isoform X3 [Orbicella faveolata]	0	0	0
adi2mcaRNA11591_R0	adi2mcaRNA11591_R0	0	0.937628	XP_015757726.1	63.7	4.8e-296	1026.5	>XP_015757726.1 PREDICTED: neurexin-1b-like [Acropora digitifera]	0	0	0
adi2mcaRNA116_R0	adi2mcaRNA116_R0	14.9203	11.6209	XP_015762449.1	62.7	4.4e-125	457.6	>XP_015762449.1 PREDICTED: caspase-3-like isoform X2 [Acropora digitifera]	0	GO:0005737;GO:0006915;GO:0097153	cytoplasm;apoptotic process;cysteine-type endopeptidase activity involved in apoptotic process
adi2mcaRNA11601_R0	adi2mcaRNA11601_R0	3128.66	5709.4	XP_015757769.1	91.2	1e-283	984.9	>XP_015757769.1 PREDICTED: tyrosine-protein kinase SRK2-like [Acropora digitifera]	K08892	GO:0004715;GO:0005524;GO:0018108	non-membrane spanning protein tyrosine kinase activity;ATP binding;peptidyl-tyrosine phosphorylation
adi2mcaRNA11640_R0	adi2mcaRNA11640_R0	728.472	562.224	XP_015757796.1	81.4	9e-229	802.4	>XP_015757796.1 PREDICTED: DNA primase large subunit-like isoform X1 [Acropora digitifera]	K02685	GO:0003896;GO:0005658;GO:0006260;GO:0051536	DNA primase activity;alpha DNA polymerase:primase complex;DNA replication;iron-sulfur cluster binding
adi2mcaRNA11640_R1	adi2mcaRNA11640_R1	1470.68	2253.27	XP_015757796.1	75.1	6.7e-202	713	>XP_015757796.1 PREDICTED: DNA primase large subunit-like isoform X1 [Acropora digitifera]	K02685	GO:0003899;GO:0005488	DNA-directed 5'-3' RNA polymerase activity;binding
adi2mcaRNA11642_R0	adi2mcaRNA11642_R0	0	0	XP_015757740.1	70.8	1.4e-152	548.9	>XP_015757740.1 PREDICTED: uncharacterized protein LOC107337132 [Acropora digitifera]	0	GO:0110165	cellular anatomical entity
adi2mcaRNA11645_R0	adi2mcaRNA11645_R0	92.6471	92.7739	XP_015757743.1	85.8	0	2612	>XP_015757743.1 PREDICTED: brefeldin A-inhibited guanine nucleotide-exchange protein 1-like [Acropora digitifera]	K18442	0	0
adi2mcaRNA11648_R7	adi2mcaRNA11648_R7	0	0	XP_015757801.1	58.2	1.3e-69	273.1	>XP_015757801.1 PREDICTED: uncharacterized protein LOC107337196 [Acropora digitifera]	0	0	0
adi2mcaRNA11654_R0	adi2mcaRNA11654_R0	2855.67	2450.09	XP_015757747.1	73.2	7.8e-126	459.9	>XP_015757747.1 PREDICTED: pescadillo homolog [Acropora digitifera]	K14843	GO:0005634;GO:0042254;GO:0043232;GO:0044237;GO:0044238;GO:0071704	nucleus;ribosome biogenesis;intracellular non-membrane-bounded organelle;cellular metabolic process;primary metabolic process;organic substance metabolic process
adi2mcaRNA11658_R0	adi2mcaRNA11658_R0	0	0	XP_015757804.1	69	2.1e-44	188	>XP_015757804.1 PREDICTED: uncharacterized protein LOC107337201 [Acropora digitifera]	0	0	0
adi2mcaRNA11658_R1	adi2mcaRNA11658_R1	0	0	XP_015757804.1	69	2.1e-44	188	>XP_015757804.1 PREDICTED: uncharacterized protein LOC107337201 [Acropora digitifera]	0	0	0
adi2mcaRNA1166_R0	adi2mcaRNA1166_R0	0	17.5471	XP_015757040.1	50.9	3.2e-110	407.9	>XP_015757040.1 PREDICTED: molybdenum cofactor biosynthesis protein 1-like [Acropora digitifera]	K03639	0	0
adi2mcaRNA1166_R3	adi2mcaRNA1166_R3	0	0	PFX23652.1	60.9	9.8e-90	339.7	>PFX23652.1 Molybdenum cofactor biosynthesis protein 1 [Stylophora pistillata]	K03639	GO:0051536	iron-sulfur cluster binding
adi2mcaRNA11670_R2	adi2mcaRNA11670_R2	0	0	XP_015764807.1	57.5	1.7e-60	241.9	>XP_015764807.1 PREDICTED: uncharacterized protein LOC107343731 [Acropora digitifera]	0	0	0
adi2mcaRNA11670_R4	adi2mcaRNA11670_R4	0	0	XP_022782167.1	78.6	4.1e-53	217.2	>XP_022782167.1 LOW QUALITY PROTEIN: uncharacterized protein LOC111323135, partial [Stylophora pistillata]	0	0	0
adi2mcaRNA11673_R0	adi2mcaRNA11673_R0	0	2.01199	XP_015772182.1	53.7	3.8e-18	101.3	>XP_015772182.1 PREDICTED: zinc finger protein 862-like isoform X2 [Acropora digitifera]	0	0	0
adi2mcaRNA11674_R0	adi2mcaRNA11674_R0	0	0	XP_015757811.1	81.6	8.4e-131	476.1	>XP_015757811.1 PREDICTED: uncharacterized protein LOC107337208 [Acropora digitifera]	0	GO:0003676	nucleic acid binding
adi2mcaRNA11674_R1	adi2mcaRNA11674_R1	0	0	PFX30012.1	88.4	4.8e-164	586.6	>PFX30012.1 hypothetical protein AWC38_SpisGene5243 [Stylophora pistillata]	K23222	GO:0003677;GO:0005044;GO:0006897;GO:0016020	DNA binding;scavenger receptor activity;endocytosis;membrane
adi2mcaRNA11675_R2	adi2mcaRNA11675_R2	0	0	XP_003728527.1	53	4.7e-117	431	>XP_003728527.1 PREDICTED: uncharacterized protein LOC100893123 [Strongylocentrotus purpuratus]	0	0	0
adi2mcaRNA11675_R3	adi2mcaRNA11675_R3	0	0	XP_003728527.1	53.3	1.2e-117	433	>XP_003728527.1 PREDICTED: uncharacterized protein LOC100893123 [Strongylocentrotus purpuratus]	0	0	0
adi2mcaRNA11675_R4	adi2mcaRNA11675_R4	0	4.75965	XP_015757812.1	57.2	2.4e-86	328.6	>XP_015757812.1 PREDICTED: uncharacterized protein LOC107337209 [Acropora digitifera]	0	0	0
adi2mcaRNA11675_R5	adi2mcaRNA11675_R5	0	0	XP_015757812.1	59.6	1.5e-81	312.4	>XP_015757812.1 PREDICTED: uncharacterized protein LOC107337209 [Acropora digitifera]	0	0	0
adi2mcaRNA11675_R7	adi2mcaRNA11675_R7	0	0	XP_003728527.1	46.2	3.6e-83	318.2	>XP_003728527.1 PREDICTED: uncharacterized protein LOC100893123 [Strongylocentrotus purpuratus]	0	0	0
adi2mcaRNA11675_R8	adi2mcaRNA11675_R8	0	0	XP_015757812.1	54.2	2.5e-79	305.1	>XP_015757812.1 PREDICTED: uncharacterized protein LOC107337209 [Acropora digitifera]	0	0	0
adi2mcaRNA11688_R0	adi2mcaRNA11688_R0	0	0	XP_015757835.1	74.4	0	1664	>XP_015757835.1 PREDICTED: uncharacterized protein LOC107337235 [Acropora digitifera]	0	GO:0005488	binding
adi2mcaRNA11688_R1	adi2mcaRNA11688_R1	0	0	XP_015757835.1	83.2	0	1659.4	>XP_015757835.1 PREDICTED: uncharacterized protein LOC107337235 [Acropora digitifera]	0	GO:0005488	binding
adi2mcaRNA11688_R2	adi2mcaRNA11688_R2	0	0	XP_015757835.1	73.7	0	1587.8	>XP_015757835.1 PREDICTED: uncharacterized protein LOC107337235 [Acropora digitifera]	0	0	0
adi2mcaRNA11688_R3	adi2mcaRNA11688_R3	0	0	XP_015757835.1	70.6	0	1494.9	>XP_015757835.1 PREDICTED: uncharacterized protein LOC107337235 [Acropora digitifera]	0	0	0
adi2mcaRNA11688_R5	adi2mcaRNA11688_R5	0	0	XP_015757835.1	68.4	0	1390.2	>XP_015757835.1 PREDICTED: uncharacterized protein LOC107337235 [Acropora digitifera]	0	0	0
adi2mcaRNA11688_R7	adi2mcaRNA11688_R7	0	0	XP_022779443.1	51.9	0	1405.2	>XP_022779443.1 uncharacterized protein LOC111320962, partial [Stylophora pistillata]	0	0	0
adi2mcaRNA11688_R9	adi2mcaRNA11688_R9	0	0	XP_015763616.1	51.4	0	1528.8	>XP_015763616.1 PREDICTED: uncharacterized protein LOC107342631 [Acropora digitifera]	0	0	0
adi2mcaRNA11691_R3	adi2mcaRNA11691_R3	0	0	XP_015775158.1	69.8	4e-135	490.7	>XP_015775158.1 PREDICTED: hemicentin-2-like isoform X7 [Acropora digitifera]	0	0	0
adi2mcaRNA11693_R0	adi2mcaRNA11693_R0	0	0	XP_015757817.1	76.3	4.2e-141	510.4	>XP_015757817.1 PREDICTED: uncharacterized protein LOC107337215 [Acropora digitifera]	0	0	0
adi2mcaRNA11693_R1	adi2mcaRNA11693_R1	0	3.90205	XP_015757817.1	74.9	4.3e-138	500.4	>XP_015757817.1 PREDICTED: uncharacterized protein LOC107337215 [Acropora digitifera]	0	0	0
adi2mcaRNA11694_R1	adi2mcaRNA11694_R1	0	0.524634	XP_015757839.1	77.3	1.5e-195	692.2	>XP_015757839.1 PREDICTED: uncharacterized protein LOC107337239 isoform X1 [Acropora digitifera]	0	0	0
adi2mcaRNA11698_R0	adi2mcaRNA11698_R0	233.529	204.005	XP_015757845.1	96.1	7.7e-226	792.3	>XP_015757845.1 PREDICTED: C-1-tetrahydrofolate synthase, cytoplasmic-like [Acropora digitifera]	0	GO:0004329;GO:0004477;GO:0004488;GO:0005524;GO:0005737;GO:0009113;GO:0009257;GO:0055114	formate-tetrahydrofolate ligase activity;methenyltetrahydrofolate cyclohydrolase activity;methylenetetrahydrofolate dehydrogenase (NADP+) activity;ATP binding;cytoplasm;purine nucleobase biosynthetic process;10-formyltetrahydrofolate biosynthetic process;oxidation-reduction process
adi2mcaRNA11713_R2	adi2mcaRNA11713_R2	0	0	XP_015757868.1	41.9	2.8e-56	228.8	>XP_015757868.1 PREDICTED: uncharacterized protein LOC107337266 [Acropora digitifera]	0	0	0
adi2mcaRNA11726_R7	adi2mcaRNA11726_R7	0	0.884451	XP_022807976.1	53.8	0	1747.3	>XP_022807976.1 ankyrin repeat domain-containing protein 50-like [Stylophora pistillata]	0	0	0
adi2mcaRNA11727_R1	adi2mcaRNA11727_R1	15.4341	17.7827	XP_015757884.1	71.1	5.4e-253	884	>XP_015757884.1 PREDICTED: DNA repair protein RAD50-like isoform X2 [Acropora digitifera]	K10866	0	0
adi2mcaRNA1174_R0	adi2mcaRNA1174_R0	140.02	47.1477	XP_015757108.1	54.7	0	1188.7	>XP_015757108.1 PREDICTED: myosin-M heavy chain-like [Acropora digitifera]	0	0	0
adi2mcaRNA11746_R1	adi2mcaRNA11746_R1	0	0.25661	XP_015757898.1	52.9	0	3789.2	>XP_015757898.1 PREDICTED: uncharacterized protein LOC107337284 [Acropora digitifera]	K13912	0	0
adi2mcaRNA11747_R1	adi2mcaRNA11747_R1	0	0	XP_015757899.1	34.9	1.6e-21	112.8	>XP_015757899.1 PREDICTED: uncharacterized protein LOC107337285 [Acropora digitifera]	0	0	0
adi2mcaRNA1175_R0	adi2mcaRNA1175_R0	10.3112	12.1086	XP_015757115.1	77.6	5.3e-96	360.1	>XP_015757115.1 PREDICTED: serine/threonine-protein kinase AtPK1/AtPK6-like [Acropora digitifera]	0	GO:0004674;GO:0009987	protein serine/threonine kinase activity;cellular process
adi2mcaRNA11774_R1	adi2mcaRNA11774_R1	31.6436	12.0714	XP_015757925.1	73.8	1.3e-169	605.5	>XP_015757925.1 PREDICTED: queuine tRNA-ribosyltransferase subunit qtrtd1-like [Acropora digitifera]	K15407	GO:0016740;GO:0101030;GO:0110165	transferase activity;tRNA-guanine transglycosylation;cellular anatomical entity
adi2mcaRNA11777_R1	adi2mcaRNA11777_R1	3.15108	10.2694	XP_015757922.1	62.2	0	1933.7	>XP_015757922.1 PREDICTED: protein PRRC2C-like [Acropora digitifera]	0	0	0
adi2mcaRNA11782_R0	adi2mcaRNA11782_R0	81.832	39.6318	XP_015757857.1	62.4	1.4e-304	1055	>XP_015757857.1 PREDICTED: whirlin-like [Acropora digitifera]	0	GO:0002141;GO:0007600;GO:0032420	stereocilia ankle link;sensory perception;stereocilium
adi2mcaRNA11784_R2	adi2mcaRNA11784_R2	12.4233	9.09047	XP_022783820.1	45	0	1260	>XP_022783820.1 E3 ubiquitin-protein ligase rnf213-alpha-like isoform X2 [Stylophora pistillata]	K22754	0	0
adi2mcaRNA11787_R1	adi2mcaRNA11787_R1	17.8868	3.18506	XP_015757859.1	72.7	0	1136.3	>XP_015757859.1 PREDICTED: E3 ubiquitin-protein ligase RNF213-like [Acropora digitifera]	K22754	GO:0003824	catalytic activity
adi2mcaRNA11807_R1	adi2mcaRNA11807_R1	0	0	XP_020629430.1	33.5	5.3e-23	117.9	>XP_020629430.1 spondin-1-like [Orbicella faveolata]	0	0	0
adi2mcaRNA11808_R7	adi2mcaRNA11808_R7	4.46341	0	XP_022799529.1	54.9	3.5e-18	101.3	>XP_022799529.1 uncharacterized protein LOC111337481 isoform X2 [Stylophora pistillata]	0	0	0
adi2mcaRNA11810_R3	adi2mcaRNA11810_R3	0	0	XP_022783093.1	52.8	0	1281.9	>XP_022783093.1 uncharacterized protein LOC111323911 [Stylophora pistillata]	0	0	0
adi2mcaRNA11812_R1	adi2mcaRNA11812_R1	17.4955	18.5586	XP_015757957.1	76.3	0	2103.9	>XP_015757957.1 PREDICTED: uncharacterized protein LOC107337339 isoform X3 [Acropora digitifera]	0	GO:0008237;GO:0016020	metallopeptidase activity;membrane
adi2mcaRNA11812_R2	adi2mcaRNA11812_R2	0	0	XP_022783093.1	53.3	0	1299.3	>XP_022783093.1 uncharacterized protein LOC111323911 [Stylophora pistillata]	0	0	0
adi2mcaRNA11816_R4	adi2mcaRNA11816_R4	0	0	XP_022783093.1	55.7	9.3e-123	449.9	>XP_022783093.1 uncharacterized protein LOC111323911 [Stylophora pistillata]	0	GO:0008152;GO:0140096	metabolic process;catalytic activity, acting on a protein
adi2mcaRNA11845_R6	adi2mcaRNA11845_R6	0	0	XP_015774102.1	75.8	2.5e-50	208.4	>XP_015774102.1 PREDICTED: uncharacterized protein LOC107352285 [Acropora digitifera]	0	0	0
adi2mcaRNA11876_R0	adi2mcaRNA11876_R0	35.5235	1.35439	XP_015758008.1	96.6	0	1197.6	>XP_015758008.1 PREDICTED: tetratricopeptide repeat protein 28-like [Acropora digitifera]	0	0	0
adi2mcaRNA11876_R3	adi2mcaRNA11876_R3	0	0.935332	XP_020600401.1	60.8	2.7e-150	543.1	>XP_020600401.1 tetratricopeptide repeat protein 28-like [Orbicella faveolata]	0	GO:0003676	nucleic acid binding
adi2mcaRNA11876_R4	adi2mcaRNA11876_R4	34.982	41.0619	XP_020600401.1	87.9	7.9e-233	817	>XP_020600401.1 tetratricopeptide repeat protein 28-like [Orbicella faveolata]	0	GO:0003676	nucleic acid binding
adi2mcaRNA11876_R7	adi2mcaRNA11876_R7	0	0.501182	XP_015776455.1	66.4	1.3e-161	580.5	>XP_015776455.1 PREDICTED: tetratricopeptide repeat protein 28-like [Acropora digitifera]	0	0	0
adi2mcaRNA11876_R9	adi2mcaRNA11876_R9	1.99762	0	XP_015776455.1	73.8	2.2e-179	639.4	>XP_015776455.1 PREDICTED: tetratricopeptide repeat protein 28-like [Acropora digitifera]	0	0	0
adi2mcaRNA11884_R1	adi2mcaRNA11884_R1	92.1982	151.583	XP_015758036.1	37.2	2.2e-117	432.2	>XP_015758036.1 PREDICTED: uncharacterized protein LOC107337409 isoform X3 [Acropora digitifera]	0	0	0
adi2mcaRNA11889_R1	adi2mcaRNA11889_R1	37.3422	21.6589	XP_015758012.1	64.7	0	1353.2	>XP_015758012.1 PREDICTED: LOW QUALITY PROTEIN: WD repeat-containing protein 17-like [Acropora digitifera]	0	0	0
adi2mcaRNA11890_R0	adi2mcaRNA11890_R0	6.81362	7.59055	XP_015758013.1	73.6	0	4152.8	>XP_015758013.1 PREDICTED: protein dachsous-like [Acropora digitifera]	0	GO:0007155;GO:0016020	cell adhesion;membrane
adi2mcaRNA11890_R1	adi2mcaRNA11890_R1	4.84008	8.68858	XP_015758013.1	73.3	0	4133.6	>XP_015758013.1 PREDICTED: protein dachsous-like [Acropora digitifera]	0	GO:0007155;GO:0016020	cell adhesion;membrane
adi2mcaRNA11892_R0	adi2mcaRNA11892_R0	28.2398	43.8964	XP_015758042.1	85.6	9.9e-186	659.1	>XP_015758042.1 PREDICTED: dachshund homolog 1-like [Acropora digitifera]	0	GO:0005634;GO:0005667;GO:0006355	nucleus;transcription factor complex;regulation of transcription, DNA-templated
adi2mcaRNA11895_R5	adi2mcaRNA11895_R5	5.81897	0	XP_015776019.1	52.2	3.3e-36	161.8	>XP_015776019.1 PREDICTED: neurogenic locus Notch protein-like [Acropora digitifera]	0	0	0
adi2mcaRNA11895_R7	adi2mcaRNA11895_R7	12.5262	3.15349	XP_020604630.1	38.8	1.3e-23	119.8	>XP_020604630.1 transmembrane protein 33-like [Orbicella faveolata]	K20724	0	0
adi2mcaRNA11905_R0	adi2mcaRNA11905_R0	2250.02	1502.39	XP_015758021.1	73.8	0	1428.3	>XP_015758021.1 PREDICTED: protein transport protein Sec24C-like [Acropora digitifera]	K14007	GO:0015031;GO:0046907	protein transport;intracellular transport
adi2mcaRNA11919_R0	adi2mcaRNA11919_R0	0	0	XP_015758025.1	71.7	7e-94	353.2	>XP_015758025.1 PREDICTED: uncharacterized protein LOC107337401 [Acropora digitifera]	0	0	0
adi2mcaRNA11941_R0	adi2mcaRNA11941_R0	736.519	828.756	XP_015758026.1	59.7	0	1846.2	>XP_015758026.1 PREDICTED: trichohyalin-like [Acropora digitifera]	0	0	0
adi2mcaRNA11944_R1	adi2mcaRNA11944_R1	0	0	XP_015758076.1	61	1.5e-107	399.1	>XP_015758076.1 PREDICTED: trace amine-associated receptor 7a-like [Acropora digitifera]	0	0	0
adi2mcaRNA11949_R0	adi2mcaRNA11949_R0	58.5576	134.578	XP_022800320.1	66.3	9.2e-225	789.3	>XP_022800320.1 sulfate anion transporter 1-like isoform X1 [Stylophora pistillata]	0	GO:0006820;GO:0015103;GO:0016020	anion transport;inorganic anion transmembrane transporter activity;membrane
adi2mcaRNA11954_R0	adi2mcaRNA11954_R0	0	0	#N/A	#N/A	#N/A	#N/A	#N/A	0	0	0
adi2mcaRNA11954_R1	adi2mcaRNA11954_R1	25.1175	13.7292	#N/A	#N/A	#N/A	#N/A	#N/A	0	0	0
adi2mcaRNA11970_R5	adi2mcaRNA11970_R5	0	0	XP_015758115.1	80.7	2.8e-50	207.6	>XP_015758115.1 PREDICTED: THAP domain-containing protein 1-like isoform X1 [Acropora digitifera]	0	GO:0004672;GO:0016310;GO:0097159;GO:1901363	protein kinase activity;phosphorylation;organic cyclic compound binding;heterocyclic compound binding
adi2mcaRNA12_R2	adi2mcaRNA12_R2	0	0.35272	PFX30425.1	54.6	0	1514.2	>PFX30425.1 Neurogenic locus Notch protein [Stylophora pistillata]	0	GO:0005488	binding
adi2mcaRNA12_R4	adi2mcaRNA12_R4	25.6255	11.2914	PFX32672.1	55.7	0	1865.1	>PFX32672.1 Hemicentin-1 [Stylophora pistillata]	0	0	0
adi2mcaRNA12_R5	adi2mcaRNA12_R5	27.5158	6.71014	PFX32672.1	56.8	0	1759.2	>PFX32672.1 Hemicentin-1 [Stylophora pistillata]	0	0	0
adi2mcaRNA12_R8	adi2mcaRNA12_R8	0	0	XP_020625308.1	55.9	0	1530	>XP_020625308.1 uncharacterized protein LOC110062702 [Orbicella faveolata]	0	0	0
adi2mcaRNA12006_R0	adi2mcaRNA12006_R0	0	2.48426	XP_015758143.1	56.2	9.6e-180	639.8	>XP_015758143.1 PREDICTED: fibroblast growth factor receptor 4-like isoform X2 [Acropora digitifera]	0	GO:0016301	kinase activity
adi2mcaRNA12013_R0	adi2mcaRNA12013_R0	0	0	XP_015758156.1	45.3	1.5e-30	142.9	>XP_015758156.1 PREDICTED: uncharacterized protein LOC107337491 isoform X6 [Acropora digitifera]	0	0	0
adi2mcaRNA12022_R8	adi2mcaRNA12022_R8	0	53.7853	PFX12980.1	76.1	1.1e-32	149.4	>PFX12980.1 hypothetical protein AWC38_SpisGene22983 [Stylophora pistillata]	0	GO:0000938;GO:0003676;GO:0004930;GO:0005829;GO:0007186;GO:0016021;GO:0042147	GARP complex;nucleic acid binding;G protein-coupled receptor activity;cytosol;G protein-coupled receptor signaling pathway;integral component of membrane;retrograde transport, endosome to Golgi
adi2mcaRNA12026_R0	adi2mcaRNA12026_R0	0	0	XP_015758163.1	58.2	1.1e-47	199.5	>XP_015758163.1 PREDICTED: uncharacterized protein LOC107337496 [Acropora digitifera]	0	0	0
adi2mcaRNA12027_R2	adi2mcaRNA12027_R2	0	0	XP_015758166.1	45.4	2e-24	121.7	>XP_015758166.1 PREDICTED: uncharacterized protein LOC107337500 [Acropora digitifera]	0	0	0
adi2mcaRNA12029_R0	adi2mcaRNA12029_R0	0	0	XP_015758104.1	45.6	1.2e-48	203	>XP_015758104.1 PREDICTED: uncharacterized protein LOC107337462 [Acropora digitifera]	0	0	0
adi2mcaRNA12030_R0	adi2mcaRNA12030_R0	0	0	XP_015758105.1	32.2	7.5e-97	365.5	>XP_015758105.1 PREDICTED: uncharacterized protein LOC107337464 [Acropora digitifera]	0	0	0
adi2mcaRNA12030_R2	adi2mcaRNA12030_R2	0	0	XP_015758105.1	33.8	3e-94	356.7	>XP_015758105.1 PREDICTED: uncharacterized protein LOC107337464 [Acropora digitifera]	0	0	0
adi2mcaRNA12031_R0	adi2mcaRNA12031_R0	2.93052	0.833138	XP_015758106.1	35.9	1.8e-280	976.9	>XP_015758106.1 PREDICTED: serine-rich adhesin for platelets-like [Acropora digitifera]	0	0	0
adi2mcaRNA12036_R0	adi2mcaRNA12036_R0	0	0	XP_015758174.1	44.6	3e-57	231.9	>XP_015758174.1 PREDICTED: uncharacterized protein LOC107337503 [Acropora digitifera]	0	0	0
adi2mcaRNA12045_R0	adi2mcaRNA12045_R0	48.8977	55.088	XP_015758180.1	84.5	0	1104	>XP_015758180.1 PREDICTED: LOW QUALITY PROTEIN: serine/threonine-protein kinase BRSK2-like [Acropora digitifera]	K08796	0	0
adi2mcaRNA12046_R0	adi2mcaRNA12046_R0	4.62599	8.60415	XP_015758181.1	54.2	1.2e-49	209.1	>XP_015758181.1 PREDICTED: platelet binding protein GspB-like [Acropora digitifera]	0	0	0
adi2mcaRNA12049_R0	adi2mcaRNA12049_R0	38.0098	19.9176	XP_015758184.1	68.7	7.3e-43	184.1	>XP_015758184.1 PREDICTED: uncharacterized protein LOC107337510 isoform X3 [Acropora digitifera]	0	0	0
adi2mcaRNA12052_R0	adi2mcaRNA12052_R0	14.7677	10.9181	XP_015758186.1	52.6	2e-38	169.5	>XP_015758186.1 PREDICTED: slit homolog 3 protein-like [Acropora digitifera]	0	0	0
adi2mcaRNA12059_R0	adi2mcaRNA12059_R0	103.476	16.0458	XP_022779990.1	70.3	1.4e-27	132.5	>XP_022779990.1 uncharacterized protein LOC111321390 isoform X2 [Stylophora pistillata]	0	0	0
adi2mcaRNA12083_R5	adi2mcaRNA12083_R5	0	0	XP_015758207.1	75.4	5.1e-107	397.1	>XP_015758207.1 PREDICTED: tyrosine kinase receptor Cad96Ca-like [Acropora digitifera]	0	GO:0004714;GO:0005044;GO:0005524;GO:0006897;GO:0016021;GO:0018108	transmembrane receptor protein tyrosine kinase activity;scavenger receptor activity;ATP binding;endocytosis;integral component of membrane;peptidyl-tyrosine phosphorylation
adi2mcaRNA12083_R8	adi2mcaRNA12083_R8	0	0	XP_015758207.1	74.3	1.4e-106	395.6	>XP_015758207.1 PREDICTED: tyrosine kinase receptor Cad96Ca-like [Acropora digitifera]	0	GO:0004714;GO:0005524;GO:0016021;GO:0018108	transmembrane receptor protein tyrosine kinase activity;ATP binding;integral component of membrane;peptidyl-tyrosine phosphorylation
adi2mcaRNA12088_R8	adi2mcaRNA12088_R8	0	0	XP_015758236.1	63.7	2e-42	182.6	>XP_015758236.1 PREDICTED: uncharacterized protein LOC107337551 isoform X2 [Acropora digitifera]	0	0	0
adi2mcaRNA12089_R4	adi2mcaRNA12089_R4	0	0	XP_015758234.1	49.5	3.4e-59	238	>XP_015758234.1 PREDICTED: uncharacterized protein LOC107337551 isoform X1 [Acropora digitifera]	0	0	0
adi2mcaRNA12091_R0	adi2mcaRNA12091_R0	0	0	XP_015758237.1	94.4	3.9e-138	500.4	>XP_015758237.1 PREDICTED: uncharacterized protein LOC107337552 [Acropora digitifera]	0	0	0
adi2mcaRNA12091_R2	adi2mcaRNA12091_R2	0	0	XP_015758237.1	77.4	2.8e-98	367.9	>XP_015758237.1 PREDICTED: uncharacterized protein LOC107337552 [Acropora digitifera]	0	0	0
adi2mcaRNA12093_R5	adi2mcaRNA12093_R5	0	0	XP_015758210.1	68.5	9.9e-41	175.6	>XP_015758210.1 PREDICTED: uncharacterized protein K02A2.6-like [Acropora digitifera]	K07497	GO:0003676;GO:0015074	nucleic acid binding;DNA integration
adi2mcaRNA12101_R1	adi2mcaRNA12101_R1	8.13161	11.9343	XP_015758241.1	76.2	0	1293.1	>XP_015758241.1 PREDICTED: xanthine dehydrogenase/oxidase-like isoform X3 [Acropora digitifera]	0	GO:0001932;GO:0004854;GO:0004855;GO:0005829;GO:0009055;GO:0009115;GO:0009968;GO:0010605;GO:0022900;GO:0032270;GO:0034418;GO:0043546;GO:0045596;GO:0046914;GO:0051537;GO:0070674;GO:0071949;GO:1902531;GO:2000026	regulation of protein phosphorylation;xanthine dehydrogenase activity;xanthine oxidase activity;cytosol;electron transfer activity;xanthine catabolic process;negative regulation of signal transduction;negative regulation of macromolecule metabolic process;electron transport chain;positive regulation of cellular protein metabolic process;urate biosynthetic process;molybdopterin cofactor binding;ne…
adi2mcaRNA12103_R0	adi2mcaRNA12103_R0	17.8995	14.4022	XP_015758241.1	82.3	0	1894.8	>XP_015758241.1 PREDICTED: xanthine dehydrogenase/oxidase-like isoform X3 [Acropora digitifera]	0	GO:0004854;GO:0004855;GO:0005829;GO:0009055;GO:0009115;GO:0022900;GO:0034418;GO:0043546;GO:0046914;GO:0051537;GO:0070674;GO:0071949	xanthine dehydrogenase activity;xanthine oxidase activity;cytosol;electron transfer activity;xanthine catabolic process;electron transport chain;urate biosynthetic process;molybdopterin cofactor binding;transition metal ion binding;2 iron, 2 sulfur cluster binding;hypoxanthine dehydrogenase activity;FAD binding
adi2mcaRNA12104_R0	adi2mcaRNA12104_R0	29433.9	18579.9	XP_022782200.1	76.6	2e-111	411.8	>XP_022782200.1 proto-oncogene c-Fos-like [Stylophora pistillata]	0	GO:0003700;GO:0006355	DNA-binding transcription factor activity;regulation of transcription, DNA-templated
adi2mcaRNA12110_R2	adi2mcaRNA12110_R2	49.6891	84.5405	XP_015758219.1	69.6	3.6e-117	431	>XP_015758219.1 PREDICTED: retinol dehydrogenase 7-like [Acropora digitifera]	K00019	GO:0016491;GO:0055114	oxidoreductase activity;oxidation-reduction process
adi2mcaRNA12110_R3	adi2mcaRNA12110_R3	4.67596	1.80187	XP_015758219.1	66.4	6.2e-117	430.3	>XP_015758219.1 PREDICTED: retinol dehydrogenase 7-like [Acropora digitifera]	K00019	GO:0016020;GO:0016491;GO:0055114	membrane;oxidoreductase activity;oxidation-reduction process
adi2mcaRNA12110_R6	adi2mcaRNA12110_R6	0	0	XP_015758219.1	56.5	1.1e-58	236.1	>XP_015758219.1 PREDICTED: retinol dehydrogenase 7-like [Acropora digitifera]	0	0	0
adi2mcaRNA12114_R0	adi2mcaRNA12114_R0	801.583	616.024	XP_015758220.1	81	1.8e-60	241.9	>XP_015758220.1 PREDICTED: cardiolipin synthase (CMP-forming)-like [Acropora digitifera]	0	GO:0005739;GO:0008444;GO:0008808;GO:0016021;GO:0032049	mitochondrion;CDP-diacylglycerol-glycerol-3-phosphate 3-phosphatidyltransferase activity;cardiolipin synthase activity;integral component of membrane;cardiolipin biosynthetic process
adi2mcaRNA12114_R1	adi2mcaRNA12114_R1	704.667	766.865	XP_015758220.1	81.8	1.9e-59	238.4	>XP_015758220.1 PREDICTED: cardiolipin synthase (CMP-forming)-like [Acropora digitifera]	0	GO:0005739;GO:0008444;GO:0008808;GO:0016021;GO:0032049	mitochondrion;CDP-diacylglycerol-glycerol-3-phosphate 3-phosphatidyltransferase activity;cardiolipin synthase activity;integral component of membrane;cardiolipin biosynthetic process
adi2mcaRNA12119_R0	adi2mcaRNA12119_R0	0	0.549889	XP_015758223.1	67.2	1.2e-254	889.4	>XP_015758223.1 PREDICTED: serine-rich adhesin for platelets-like [Acropora digitifera]	0	GO:0005509;GO:0007160;GO:0016021	calcium ion binding;cell-matrix adhesion;integral component of membrane
adi2mcaRNA12119_R1	adi2mcaRNA12119_R1	0	0	XP_015758223.1	68.3	3.3e-260	907.9	>XP_015758223.1 PREDICTED: serine-rich adhesin for platelets-like [Acropora digitifera]	0	GO:0005509;GO:0007160;GO:0016021	calcium ion binding;cell-matrix adhesion;integral component of membrane
adi2mcaRNA12121_R1	adi2mcaRNA12121_R1	0	0	XP_015758249.1	73.9	1.6e-47	199.1	>XP_015758249.1 PREDICTED: mucin-like protein isoform X1 [Acropora digitifera]	0	GO:0005509;GO:0007160	calcium ion binding;cell-matrix adhesion
adi2mcaRNA12124_R0	adi2mcaRNA12124_R0	0	0	XP_015758254.1	73.8	2.3e-58	235	>XP_015758254.1 PREDICTED: uncharacterized protein LOC107337565 [Acropora digitifera]	0	0	0
adi2mcaRNA12124_R1	adi2mcaRNA12124_R1	6.999	0	XP_020901225.1	41	3.2e-18	101.7	>XP_020901225.1 uncharacterized protein LOC110239808 [Exaiptasia pallida]	0	0	0
adi2mcaRNA12124_R3	adi2mcaRNA12124_R3	3.76328	0	KXJ20573.1	40.6	1.7e-21	112.5	>KXJ20573.1 hypothetical protein AC249_AIPGENE9410 [Exaiptasia pallida]	0	0	0
adi2mcaRNA12124_R4	adi2mcaRNA12124_R4	7.16644	0	XP_020901225.1	45.4	1.2e-30	142.9	>XP_020901225.1 uncharacterized protein LOC110239808 [Exaiptasia pallida]	0	0	0
adi2mcaRNA12131_R0	adi2mcaRNA12131_R0	169.642	291.564	XP_015758261.1	81.5	4.7e-260	906.4	>XP_015758261.1 PREDICTED: tyrosyl-DNA phosphodiesterase 1-like isoform X2 [Acropora digitifera]	K10862	0	0
adi2mcaRNA12149_R0	adi2mcaRNA12149_R0	0	4.9526	XP_015776281.1	52.1	1.7e-76	295.8	>XP_015776281.1 PREDICTED: trace amine-associated receptor 7c-like [Acropora digitifera]	0	0	0
adi2mcaRNA12152_R1	adi2mcaRNA12152_R1	0	0	XP_015758273.1	70	3.4e-59	238	>XP_015758273.1 PREDICTED: uncharacterized protein LOC107337581 [Acropora digitifera]	0	0	0
adi2mcaRNA12155_R7	adi2mcaRNA12155_R7	0	28.298	XP_015779403.1	50.9	1.3e-68	269.6	>XP_015779403.1 PREDICTED: lysophosphatidic acid receptor 1-A-like [Acropora digitifera]	0	0	0
adi2mcaRNA12159_R3	adi2mcaRNA12159_R3	2.43939	7.88831	XP_015748648.1	55	6.8e-62	247.3	>XP_015748648.1 PREDICTED: adrenocorticotropic hormone receptor-like isoform X1 [Acropora digitifera]	0	0	0
adi2mcaRNA12162_R1	adi2mcaRNA12162_R1	10.8803	13.592	XP_015758278.1	87.4	9.8e-185	655.6	>XP_015758278.1 PREDICTED: bifunctional purine biosynthesis protein PURH-like [Acropora digitifera]	K00602	GO:0003937;GO:0004643;GO:0005829;GO:0006189	IMP cyclohydrolase activity;phosphoribosylaminoimidazolecarboxamide formyltransferase activity;cytosol;'de novo' IMP biosynthetic process
adi2mcaRNA12175_R1	adi2mcaRNA12175_R1	245.31	77.9435	XP_015758313.1	64.6	9.6e-138	499.6	>XP_015758313.1 PREDICTED: uncharacterized protein LOC107337622 isoform X1 [Acropora digitifera]	0	0	0
adi2mcaRNA12184_R3	adi2mcaRNA12184_R3	0	0	XP_020907531.1	68.1	4.6e-67	264.2	>XP_020907531.1 uncharacterized protein K02A2.6-like [Exaiptasia pallida]	0	0	0
adi2mcaRNA12186_R3	adi2mcaRNA12186_R3	0	0	XP_015758284.1	85.7	4.5e-91	343.6	>XP_015758284.1 PREDICTED: zinc finger MYM-type protein 1-like [Acropora digitifera]	0	GO:0016301;GO:0016310;GO:0046983	kinase activity;phosphorylation;protein dimerization activity
adi2mcaRNA12212_R1	adi2mcaRNA12212_R1	3.59175	2.81645	XP_015758353.1	64.9	8e-232	812.8	>XP_015758353.1 PREDICTED: DBH-like monooxygenase protein 1 isoform X1 [Acropora digitifera]	K00503	GO:0003824	catalytic activity
adi2mcaRNA12219_R0	adi2mcaRNA12219_R0	0	0	XP_015758363.1	56.6	2.7e-116	428.3	>XP_015758363.1 PREDICTED: uncharacterized protein LOC107337665 [Acropora digitifera]	0	0	0
adi2mcaRNA12219_R1	adi2mcaRNA12219_R1	0	0	XP_022780858.1	48.6	2e-106	395.6	>XP_022780858.1 uncharacterized protein LOC111322081 [Stylophora pistillata]	0	0	0
adi2mcaRNA12220_R1	adi2mcaRNA12220_R1	5.2868	2.09947	XP_015758361.1	69.5	5.2e-230	806.6	>XP_015758361.1 PREDICTED: TNF receptor-associated factor 3-like [Acropora digitifera]	0	GO:0019899;GO:0048584;GO:0051171;GO:0060255;GO:0080090;GO:0080134;GO:0110165;GO:1902531	enzyme binding;positive regulation of response to stimulus;regulation of nitrogen compound metabolic process;regulation of macromolecule metabolic process;regulation of primary metabolic process;regulation of response to stress;cellular anatomical entity;regulation of intracellular signal transduction
adi2mcaRNA12226_R0	adi2mcaRNA12226_R0	1060.75	649.409	XP_015758367.1	93.8	3.9e-71	276.9	>XP_015758367.1 PREDICTED: hypoxanthine-guanine phosphoribosyltransferase-like [Acropora digitifera]	K00760	GO:0000166;GO:0000287;GO:0001913;GO:0001975;GO:0004422;GO:0005829;GO:0006168;GO:0006178;GO:0007625;GO:0007626;GO:0021756;GO:0021895;GO:0021954;GO:0032263;GO:0032264;GO:0042803;GO:0043103;GO:0045964;GO:0046038;GO:0046651;GO:0048813;GO:0051289;GO:0052657	nucleotide binding;magnesium ion binding;T cell mediated cytotoxicity;response to amphetamine;hypoxanthine phosphoribosyltransferase activity;cytosol;adenine salvage;guanine salvage;grooming behavior;locomotory behavior;striatum development;cerebral cortex neuron differentiation;central nervous system neuron development;GMP salvage;IMP salvage;protein homodimerization activity;hypoxanthine salvag…
adi2mcaRNA12250_R1	adi2mcaRNA12250_R1	4.54081	0	XP_015758396.1	66.1	7.5e-58	233	>XP_015758396.1 PREDICTED: uncharacterized protein LOC107337691 [Acropora digitifera]	0	0	0
adi2mcaRNA12254_R0	adi2mcaRNA12254_R0	3.78229	22.6611	XP_015758391.1	79.9	3.6e-80	307.4	>XP_015758391.1 PREDICTED: uncharacterized protein LOC107337690 isoform X1 [Acropora digitifera]	K02946	GO:0005840;GO:0007165;GO:0016020	ribosome;signal transduction;membrane
adi2mcaRNA12255_R2	adi2mcaRNA12255_R2	0	0	XP_015758385.1	57	2.2e-93	352.1	>XP_015758385.1 PREDICTED: uncharacterized protein LOC107337688 isoform X1 [Acropora digitifera]	0	0	0
adi2mcaRNA12256_R0	adi2mcaRNA12256_R0	0	0	XP_015758385.1	60.8	5e-127	464.2	>XP_015758385.1 PREDICTED: uncharacterized protein LOC107337688 isoform X1 [Acropora digitifera]	0	0	0
adi2mcaRNA12259_R5	adi2mcaRNA12259_R5	8.92743	2.96242	XP_015770840.1	84.2	3.5e-88	334.7	>XP_015770840.1 PREDICTED: uncharacterized protein LOC107349245 [Acropora digitifera]	0	0	0
adi2mcaRNA12268_R0	adi2mcaRNA12268_R0	7.02962	13.4736	XP_015758342.1	77.6	2.4e-185	657.9	>XP_015758342.1 PREDICTED: uncharacterized protein LOC107337644 [Acropora digitifera]	0	0	0
adi2mcaRNA12268_R1	adi2mcaRNA12268_R1	0	0	XP_015758342.1	73.3	1.6e-184	655.2	>XP_015758342.1 PREDICTED: uncharacterized protein LOC107337644 [Acropora digitifera]	0	0	0
adi2mcaRNA12268_R2	adi2mcaRNA12268_R2	0	0	XP_015758342.1	74.6	8.3e-189	669.5	>XP_015758342.1 PREDICTED: uncharacterized protein LOC107337644 [Acropora digitifera]	0	0	0
adi2mcaRNA12268_R4	adi2mcaRNA12268_R4	6.77463	10.4625	XP_015758342.1	58.6	6.8e-127	463.8	>XP_015758342.1 PREDICTED: uncharacterized protein LOC107337644 [Acropora digitifera]	0	0	0
adi2mcaRNA12268_R6	adi2mcaRNA12268_R6	10.4154	0	XP_015758342.1	47.3	7.5e-103	384	>XP_015758342.1 PREDICTED: uncharacterized protein LOC107337644 [Acropora digitifera]	0	0	0
adi2mcaRNA12268_R7	adi2mcaRNA12268_R7	4.6554	0.828975	XP_015758342.1	45.9	7.4e-92	347.4	>XP_015758342.1 PREDICTED: uncharacterized protein LOC107337644 [Acropora digitifera]	0	0	0
adi2mcaRNA12268_R9	adi2mcaRNA12268_R9	12.8924	33.0547	XP_015758342.1	46.5	5.2e-81	311.2	>XP_015758342.1 PREDICTED: uncharacterized protein LOC107337644 [Acropora digitifera]	0	0	0
adi2mcaRNA12271_R0	adi2mcaRNA12271_R0	36.676	44.0203	XP_015758344.1	72.5	0	2523.4	>XP_015758344.1 PREDICTED: adenylate cyclase type 10-like [Acropora digitifera]	K11265	GO:0009190;GO:0016849;GO:0035556	cyclic nucleotide biosynthetic process;phosphorus-oxygen lyase activity;intracellular signal transduction
adi2mcaRNA12272_R0	adi2mcaRNA12272_R0	2.03513	0	XP_015758345.1	59.6	5.7e-275	956.4	>XP_015758345.1 PREDICTED: uncharacterized protein LOC107337647 [Acropora digitifera]	0	GO:0004714;GO:0005524;GO:0005887;GO:0007169;GO:0007275;GO:0018108;GO:0033674;GO:0043235	transmembrane receptor protein tyrosine kinase activity;ATP binding;integral component of plasma membrane;transmembrane receptor protein tyrosine kinase signaling pathway;multicellular organism development;peptidyl-tyrosine phosphorylation;positive regulation of kinase activity;receptor complex
adi2mcaRNA12278_R0	adi2mcaRNA12278_R0	145.197	98.0398	XP_015750236.1	69.4	6.8e-144	521.2	>XP_015750236.1 PREDICTED: uncharacterized protein LOC107330103, partial [Acropora digitifera]	0	GO:0006506;GO:0030176;GO:0051267	GPI anchor biosynthetic process;integral component of endoplasmic reticulum membrane;CP2 mannose-ethanolamine phosphotransferase activity
adi2mcaRNA12291_R6	adi2mcaRNA12291_R6	9.2819	3.98602	XP_015759194.1	81.7	4.3e-75	290.8	>XP_015759194.1 PREDICTED: BTB/POZ domain-containing protein 6-like [Acropora digitifera]	0	0	0
adi2mcaRNA1230_R0	adi2mcaRNA1230_R0	33.9211	3.57153	XP_015758430.1	55.1	9.5e-90	340.5	>XP_015758430.1 PREDICTED: slit homolog 1 protein-like isoform X3 [Acropora digitifera]	0	0	0
adi2mcaRNA12306_R2	adi2mcaRNA12306_R2	0	0	KXJ11565.1	67.6	2.4e-169	605.5	>KXJ11565.1 RNA-directed DNA polymerase from mobile element jockey [Exaiptasia pallida]	0	GO:0006807;GO:0016772;GO:0044238;GO:0044260;GO:0097159;GO:1901363	nitrogen compound metabolic process;transferase activity, transferring phosphorus-containing groups;primary metabolic process;cellular macromolecule metabolic process;organic cyclic compound binding;heterocyclic compound binding
adi2mcaRNA12306_R3	adi2mcaRNA12306_R3	0	0	XP_015758349.1	53.2	1.4e-117	433	>XP_015758349.1 PREDICTED: uncharacterized protein LOC107337653 [Acropora digitifera]	0	0	0
adi2mcaRNA12306_R4	adi2mcaRNA12306_R4	0	4.02156	PFX21740.1	45.1	6.8e-118	434.1	>PFX21740.1 Neuroendocrine convertase 1 [Stylophora pistillata]	0	GO:0005488	binding
adi2mcaRNA12306_R7	adi2mcaRNA12306_R7	0	0	PFX14240.1	74.9	2.2e-109	405.6	>PFX14240.1 hypothetical protein AWC38_SpisGene21620 [Stylophora pistillata]	0	GO:0003824;GO:0005488	catalytic activity;binding
adi2mcaRNA12307_R0	adi2mcaRNA12307_R0	0	2.29371	XP_015758350.1	73.4	0	1255.7	>XP_015758350.1 PREDICTED: uncharacterized protein LOC107337654 [Acropora digitifera]	0	0	0
adi2mcaRNA12307_R3	adi2mcaRNA12307_R3	0	0	XP_015758350.1	58.3	3.7e-305	1057	>XP_015758350.1 PREDICTED: uncharacterized protein LOC107337654 [Acropora digitifera]	0	0	0
adi2mcaRNA12307_R7	adi2mcaRNA12307_R7	0	0	XP_015758350.1	56	1.4e-280	975.3	>XP_015758350.1 PREDICTED: uncharacterized protein LOC107337654 [Acropora digitifera]	0	0	0
adi2mcaRNA12307_R9	adi2mcaRNA12307_R9	0	0	XP_015758350.1	54.6	1.7e-269	938.3	>XP_015758350.1 PREDICTED: uncharacterized protein LOC107337654 [Acropora digitifera]	0	0	0
adi2mcaRNA12308_R7	adi2mcaRNA12308_R7	0	0	XP_015758431.1	58.5	2.7e-158	568.2	>XP_015758431.1 PREDICTED: putative ATP-dependent DNA helicase Q1 [Acropora digitifera]	0	0	0
adi2mcaRNA12308_R8	adi2mcaRNA12308_R8	0	0	XP_015758431.1	63.6	1.5e-157	565.5	>XP_015758431.1 PREDICTED: putative ATP-dependent DNA helicase Q1 [Acropora digitifera]	0	0	0
adi2mcaRNA12310_R9	adi2mcaRNA12310_R9	0	0	XP_015770354.1	62.5	1.4e-45	192.2	>XP_015770354.1 PREDICTED: uncharacterized protein LOC107348788 [Acropora digitifera]	0	0	0
adi2mcaRNA12316_R0	adi2mcaRNA12316_R0	0	0	XP_015758434.1	81.3	0	2063.1	>XP_015758434.1 PREDICTED: uncharacterized protein LOC107337721 [Acropora digitifera]	0	GO:0003676;GO:0006259	nucleic acid binding;DNA metabolic process
adi2mcaRNA12316_R1	adi2mcaRNA12316_R1	0	0	XP_015758434.1	80.8	0	2056.6	>XP_015758434.1 PREDICTED: uncharacterized protein LOC107337721 [Acropora digitifera]	0	GO:0003676;GO:0006259	nucleic acid binding;DNA metabolic process
adi2mcaRNA12316_R2	adi2mcaRNA12316_R2	7.99696	0	XP_015758434.1	79.9	0	2042.3	>XP_015758434.1 PREDICTED: uncharacterized protein LOC107337721 [Acropora digitifera]	0	0	0
adi2mcaRNA12316_R4	adi2mcaRNA12316_R4	0	0	XP_015758434.1	80.3	0	2028.4	>XP_015758434.1 PREDICTED: uncharacterized protein LOC107337721 [Acropora digitifera]	0	GO:0003676;GO:0006259	nucleic acid binding;DNA metabolic process
adi2mcaRNA12316_R5	adi2mcaRNA12316_R5	0	0	XP_015758434.1	72.3	0	1740.7	>XP_015758434.1 PREDICTED: uncharacterized protein LOC107337721 [Acropora digitifera]	0	0	0
adi2mcaRNA12316_R8	adi2mcaRNA12316_R8	0.755695	1.22185	XP_015758434.1	52.7	0	1235.7	>XP_015758434.1 PREDICTED: uncharacterized protein LOC107337721 [Acropora digitifera]	0	GO:0006807;GO:0043170;GO:0044238	nitrogen compound metabolic process;macromolecule metabolic process;primary metabolic process
adi2mcaRNA12344_R0	adi2mcaRNA12344_R0	679.199	1361.93	XP_015758439.1	84	2.4e-85	324.7	>XP_015758439.1 PREDICTED: mitochondrial coenzyme A transporter SLC25A42-like [Acropora digitifera]	0	GO:0005743;GO:0016021;GO:0022857;GO:0055085	mitochondrial inner membrane;integral component of membrane;transmembrane transporter activity;transmembrane transport
adi2mcaRNA12348_R0	adi2mcaRNA12348_R0	0	0	XP_015758479.1	63.8	3e-142	514.6	>XP_015758479.1 PREDICTED: low choriolytic enzyme-like [Acropora digitifera]	0	GO:0008233	peptidase activity
adi2mcaRNA12355_R2	adi2mcaRNA12355_R2	0	0	XP_015758484.1	56.3	3.6e-45	191.4	>XP_015758484.1 PREDICTED: uncharacterized protein LOC107337766 [Acropora digitifera]	0	0	0
adi2mcaRNA12355_R5	adi2mcaRNA12355_R5	0	0	XP_015758484.1	56.3	1.1e-39	172.9	>XP_015758484.1 PREDICTED: uncharacterized protein LOC107337766 [Acropora digitifera]	0	0	0
adi2mcaRNA12356_R0	adi2mcaRNA12356_R0	0	0	XP_015758483.1	72.5	5.7e-284	986.1	>XP_015758483.1 PREDICTED: uncharacterized protein LOC107337765 [Acropora digitifera]	0	0	0
adi2mcaRNA12356_R1	adi2mcaRNA12356_R1	0	0	XP_015758483.1	66.4	1e-252	882.5	>XP_015758483.1 PREDICTED: uncharacterized protein LOC107337765 [Acropora digitifera]	0	0	0
adi2mcaRNA12356_R2	adi2mcaRNA12356_R2	0	0	XP_015758483.1	64.4	1.3e-241	845.5	>XP_015758483.1 PREDICTED: uncharacterized protein LOC107337765 [Acropora digitifera]	0	0	0
adi2mcaRNA12356_R4	adi2mcaRNA12356_R4	0	0	XP_015758483.1	63.2	9.9e-239	835.9	>XP_015758483.1 PREDICTED: uncharacterized protein LOC107337765 [Acropora digitifera]	0	0	0
adi2mcaRNA12356_R5	adi2mcaRNA12356_R5	9.17948	3.03334	XP_015758483.1	44.6	4.3e-160	574.7	>XP_015758483.1 PREDICTED: uncharacterized protein LOC107337765 [Acropora digitifera]	0	0	0
adi2mcaRNA12356_R6	adi2mcaRNA12356_R6	0	0.462159	XP_015758483.1	45.8	1.6e-164	589.3	>XP_015758483.1 PREDICTED: uncharacterized protein LOC107337765 [Acropora digitifera]	0	0	0
adi2mcaRNA12356_R7	adi2mcaRNA12356_R7	0	0	XP_015758483.1	60.2	2.5e-144	521.5	>XP_015758483.1 PREDICTED: uncharacterized protein LOC107337765 [Acropora digitifera]	0	0	0
adi2mcaRNA12356_R8	adi2mcaRNA12356_R8	0	0	XP_015758483.1	55.3	7.4e-145	523.5	>XP_015758483.1 PREDICTED: uncharacterized protein LOC107337765 [Acropora digitifera]	0	0	0
adi2mcaRNA12357_R2	adi2mcaRNA12357_R2	0	0	XP_015758486.1	48.9	5.4e-43	183.7	>XP_015758486.1 PREDICTED: uncharacterized protein LOC107337767 [Acropora digitifera]	0	0	0
adi2mcaRNA1237_R3	adi2mcaRNA1237_R3	0	1.12533	XP_015758545.1	52.7	7.4e-36	160.6	>XP_015758545.1 PREDICTED: latent-transforming growth factor beta-binding protein 1-like [Acropora digitifera]	0	0	0
adi2mcaRNA1237_R4	adi2mcaRNA1237_R4	22.9974	0	XP_015758545.1	58.3	6.8e-48	200.7	>XP_015758545.1 PREDICTED: latent-transforming growth factor beta-binding protein 1-like [Acropora digitifera]	0	0	0
adi2mcaRNA12372_R1	adi2mcaRNA12372_R1	0	0	XP_015758498.1	48.6	2.5e-32	149.1	>XP_015758498.1 PREDICTED: RNA/RNP complex-1-interacting phosphatase-like [Acropora digitifera]	0	GO:0004725;GO:0008138;GO:0035335	protein tyrosine phosphatase activity;protein tyrosine/serine/threonine phosphatase activity;peptidyl-tyrosine dephosphorylation
adi2mcaRNA12375_R0	adi2mcaRNA12375_R0	1313.15	1554.79	XP_015758446.1	80.9	0	1726.8	>XP_015758446.1 PREDICTED: cilia- and flagella-associated protein 43-like [Acropora digitifera]	0	0	0
adi2mcaRNA12377_R0	adi2mcaRNA12377_R0	109.981	88.9825	XP_015758505.1	92	9.3e-186	659.1	>XP_015758505.1 PREDICTED: uncharacterized protein LOC107337783 isoform X2 [Acropora digitifera]	0	0	0
adi2mcaRNA12379_R0	adi2mcaRNA12379_R0	24.2875	3.45996	XP_015758502.1	64.8	1.4e-101	379.4	>XP_015758502.1 PREDICTED: collagen alpha-1(II) chain-like isoform X2 [Acropora digitifera]	0	0	0
adi2mcaRNA12387_R2	adi2mcaRNA12387_R2	0	0	XP_020632380.1	58.9	9.5e-217	762.7	>XP_020632380.1 uncharacterized protein LOC110069228 [Orbicella faveolata]	K17834	0	0
adi2mcaRNA12387_R3	adi2mcaRNA12387_R3	0	0	XP_020632380.1	76.1	7.7e-135	489.6	>XP_020632380.1 uncharacterized protein LOC110069228 [Orbicella faveolata]	0	0	0
adi2mcaRNA1239_R2	adi2mcaRNA1239_R2	6.79371	4.59763	XP_015758477.1	64.2	0	2162.1	>XP_015758477.1 PREDICTED: NFX1-type zinc finger-containing protein 1-like isoform X1 [Acropora digitifera]	K11701	0	0
adi2mcaRNA1239_R3	adi2mcaRNA1239_R3	1.24536	4.3252	XP_015758477.1	62.5	0	2073.1	>XP_015758477.1 PREDICTED: NFX1-type zinc finger-containing protein 1-like isoform X1 [Acropora digitifera]	0	0	0
adi2mcaRNA12392_R0	adi2mcaRNA12392_R0	0	0	XP_015758448.1	62.9	2.6e-85	324.7	>XP_015758448.1 PREDICTED: putative nuclease HARBI1 [Acropora digitifera]	K23222	GO:0016020	membrane
adi2mcaRNA12399_R0	adi2mcaRNA12399_R0	15.3961	10.3462	XP_015758541.1	76.6	4.4e-150	540.4	>XP_015758541.1 PREDICTED: 4-hydroxy-2-oxoglutarate aldolase, mitochondrial-like [Acropora digitifera]	K18123	GO:0016020;GO:0016829	membrane;lyase activity
adi2mcaRNA12403_R0	adi2mcaRNA12403_R0	627.689	451.876	XP_015758520.1	50.9	2.6e-219	771.5	>XP_015758520.1 PREDICTED: nucleolar protein 14-like [Acropora digitifera]	K14766	0	0
adi2mcaRNA12420_R0	adi2mcaRNA12420_R0	185.344	153.325	XP_015758525.1	58.5	5.9e-213	750.4	>XP_015758525.1 PREDICTED: uncharacterized protein LOC107337802 [Acropora digitifera]	0	GO:0004993;GO:0005887;GO:0007187;GO:0007268;GO:0030425	G protein-coupled serotonin receptor activity;integral component of plasma membrane;G protein-coupled receptor signaling pathway, coupled to cyclic nucleotide second messenger;chemical synaptic transmission;dendrite
adi2mcaRNA12420_R3	adi2mcaRNA12420_R3	3.82088	5.20201	XP_015757227.1	80.4	6.8e-119	437.6	>XP_015757227.1 PREDICTED: adenosine receptor A2a-like [Acropora digitifera]	0	GO:0004930;GO:0007186;GO:0016021	G protein-coupled receptor activity;G protein-coupled receptor signaling pathway;integral component of membrane
adi2mcaRNA12429_R1	adi2mcaRNA12429_R1	9.63226	27.3499	XP_015758527.1	80.4	0	2003	>XP_015758527.1 PREDICTED: dedicator of cytokinesis protein 5-like [Acropora digitifera]	0	GO:0009987	cellular process
adi2mcaRNA12432_R0	adi2mcaRNA12432_R0	12386.3	20165.7	XP_015758528.1	61	1e-182	649.4	>XP_015758528.1 PREDICTED: uncharacterized protein LOC107337804 [Acropora digitifera]	K18622	GO:0005198;GO:0005856;GO:0030507;GO:0044853;GO:0051015;GO:0051016;GO:0051017	structural molecule activity;cytoskeleton;spectrin binding;plasma membrane raft;actin filament binding;barbed-end actin filament capping;actin filament bundle assembly
adi2mcaRNA12434_R0	adi2mcaRNA12434_R0	57.2748	27.643	XP_015758529.1	70.3	1.4e-144	522.3	>XP_015758529.1 PREDICTED: ancient ubiquitous protein 1-like [Acropora digitifera]	K19716	GO:0016020	membrane
adi2mcaRNA12448_R4	adi2mcaRNA12448_R4	0	0	XP_020624815.1	31.2	3e-11	78.6	>XP_020624815.1 uncharacterized protein LOC110062286 [Orbicella faveolata]	0	0	0
adi2mcaRNA12454_R0	adi2mcaRNA12454_R0	14.7329	0.655862	XP_015758534.1	35.9	8.9e-110	408.3	>XP_015758534.1 PREDICTED: uncharacterized protein LOC107337811 [Acropora digitifera]	0	0	0
adi2mcaRNA12469_R2	adi2mcaRNA12469_R2	0	0	XP_015758607.1	93.4	7.6e-99	369.4	>XP_015758607.1 PREDICTED: uncharacterized protein LOC107337886 [Acropora digitifera]	0	GO:0016020;GO:0043087;GO:0050794	membrane;regulation of GTPase activity;regulation of cellular process
adi2mcaRNA12469_R8	adi2mcaRNA12469_R8	0	0	XP_015758607.1	91.3	1.5e-94	355.1	>XP_015758607.1 PREDICTED: uncharacterized protein LOC107337886 [Acropora digitifera]	0	GO:0016020;GO:0043087;GO:0050794	membrane;regulation of GTPase activity;regulation of cellular process
adi2mcaRNA12469_R9	adi2mcaRNA12469_R9	0	0	XP_015758607.1	91.3	1.9e-94	354.8	>XP_015758607.1 PREDICTED: uncharacterized protein LOC107337886 [Acropora digitifera]	0	GO:0016020;GO:0043087;GO:0050794	membrane;regulation of GTPase activity;regulation of cellular process
adi2mcaRNA12486_R0	adi2mcaRNA12486_R0	7.5485	14.202	XP_015758618.1	55	9.3e-253	882.9	>XP_015758618.1 PREDICTED: uncharacterized protein LOC107337894 isoform X2 [Acropora digitifera]	0	GO:0050794	regulation of cellular process
adi2mcaRNA12486_R1	adi2mcaRNA12486_R1	0	0.321012	XP_015758618.1	51.8	1e-241	846.3	>XP_015758618.1 PREDICTED: uncharacterized protein LOC107337894 isoform X2 [Acropora digitifera]	0	GO:0050794	regulation of cellular process
adi2mcaRNA1250_R1	adi2mcaRNA1250_R1	36.0315	96.2936	XP_015757301.1	65.8	2.5e-161	578.2	>XP_015757301.1 PREDICTED: uncharacterized protein LOC107336748 [Acropora digitifera]	0	GO:0005488;GO:0005622;GO:0110165	binding;intracellular;cellular anatomical entity
adi2mcaRNA12507_R0	adi2mcaRNA12507_R0	2576.37	652.26	XP_015758598.1	68	6.6e-47	196.4	>XP_015758598.1 PREDICTED: 60S ribosomal protein L7a-like [Acropora digitifera]	K02936	GO:0000470;GO:0003723;GO:0022625	maturation of LSU-rRNA;RNA binding;cytosolic large ribosomal subunit
adi2mcaRNA12520_R1	adi2mcaRNA12520_R1	7.72055	8.60607	XP_015758641.1	51.6	2.3e-75	292.4	>XP_015758641.1 PREDICTED: uncharacterized protein LOC107337909 isoform X4 [Acropora digitifera]	0	0	0
adi2mcaRNA12524_R0	adi2mcaRNA12524_R0	474.424	349.256	XP_015758643.1	83.7	1.2e-160	575.5	>XP_015758643.1 PREDICTED: mitochondrial thiamine pyrophosphate carrier-like isoform X1 [Acropora digitifera]	K15108	GO:0015234;GO:0030974;GO:0031305	thiamine transmembrane transporter activity;thiamine pyrophosphate transmembrane transport;integral component of mitochondrial inner membrane
adi2mcaRNA12529_R0	adi2mcaRNA12529_R0	0	0	XP_015758650.1	63	2.1e-98	368.6	>XP_015758650.1 PREDICTED: melanocortin receptor 4-like [Acropora digitifera]	0	0	0
adi2mcaRNA12533_R7	adi2mcaRNA12533_R7	15.9576	61.6535	XP_020626866.1	46.6	8.1e-56	227.3	>XP_020626866.1 histamine H2 receptor-like [Orbicella faveolata]	0	0	0
adi2mcaRNA12533_R8	adi2mcaRNA12533_R8	15.4068	55.409	XP_020626866.1	45.5	1.8e-55	226.1	>XP_020626866.1 histamine H2 receptor-like [Orbicella faveolata]	0	0	0
adi2mcaRNA1254_R0	adi2mcaRNA1254_R0	124.738	433.466	XP_020630317.1	89.3	6.2e-94	354	>XP_020630317.1 kelch domain-containing protein 3-like [Orbicella faveolata]	0	GO:0000790;GO:0003682;GO:0005737	nuclear chromatin;chromatin binding;cytoplasm
adi2mcaRNA12554_R0	adi2mcaRNA12554_R0	335.628	324.184	XP_015758665.1	70.4	4.2e-86	328.2	>XP_015758665.1 PREDICTED: coiled-coil domain-containing protein 112-like [Acropora digitifera]	0	0	0
adi2mcaRNA12557_R0	adi2mcaRNA12557_R0	30572.5	21195.3	XP_015758669.1	93.9	6.9e-244	852.4	>XP_015758669.1 PREDICTED: Golgi pH regulator-like [Acropora digitifera]	K22193	GO:0005623;GO:0008308;GO:0015698;GO:0016021;GO:0032580;GO:0034220;GO:0051452	cell;voltage-gated anion channel activity;inorganic anion transport;integral component of membrane;Golgi cisterna membrane;ion transmembrane transport;intracellular pH reduction
adi2mcaRNA12561_R0	adi2mcaRNA12561_R0	22.2751	17.3604	XP_015758673.1	73.5	6.1e-150	540	>XP_015758673.1 PREDICTED: galactose-3-O-sulfotransferase 2-like [Acropora digitifera]	0	0	0
adi2mcaRNA12569_R1	adi2mcaRNA12569_R1	7.74717	4.17537	XP_015758680.1	77.2	2e-124	454.9	>XP_015758680.1 PREDICTED: gamma-aminobutyric acid receptor subunit gamma-2-like [Acropora digitifera]	0	GO:0004888;GO:0005230;GO:0016021;GO:0034220	transmembrane signaling receptor activity;extracellular ligand-gated ion channel activity;integral component of membrane;ion transmembrane transport
adi2mcaRNA12571_R0	adi2mcaRNA12571_R0	355.836	209.99	XP_015758682.1	76	9.9e-159	569.3	>XP_015758682.1 PREDICTED: serine/threonine-protein kinase STK11-like [Acropora digitifera]	K07298	GO:0000166;GO:0004674;GO:0005634;GO:0005737;GO:0006468;GO:0007052;GO:0009966;GO:0031323;GO:0035556;GO:0042592;GO:0043167;GO:0048522;GO:0048523;GO:0048699;GO:0051128;GO:2000026	nucleotide binding;protein serine/threonine kinase activity;nucleus;cytoplasm;protein phosphorylation;mitotic spindle organization;regulation of signal transduction;regulation of cellular metabolic process;intracellular signal transduction;homeostatic process;ion binding;positive regulation of cellular process;negative regulation of cellular process;generation of neurons;regulation of cellular co…
adi2mcaRNA12572_R0	adi2mcaRNA12572_R0	0	0	XP_022807870.1	93.1	1.2e-21	112.8	>XP_022807870.1 pre-mRNA-splicing factor 38A-like [Stylophora pistillata]	0	GO:0016021;GO:0071011	integral component of membrane;precatalytic spliceosome
adi2mcaRNA12573_R0	adi2mcaRNA12573_R0	1.79762	0	XP_015758707.1	64.1	9.9e-308	1065.4	>XP_015758707.1 PREDICTED: tetratricopeptide repeat protein 28-like [Acropora digitifera]	0	0	0
adi2mcaRNA12573_R1	adi2mcaRNA12573_R1	11.0225	0	XP_015758707.1	53.7	3.1e-306	1060.8	>XP_015758707.1 PREDICTED: tetratricopeptide repeat protein 28-like [Acropora digitifera]	0	0	0
adi2mcaRNA12577_R0	adi2mcaRNA12577_R0	0	0.614024	XP_015761712.1	62.6	7.1e-154	553.5	>XP_015761712.1 PREDICTED: receptor-type tyrosine-protein phosphatase F-like, partial [Acropora digitifera]	0	0	0
adi2mcaRNA12577_R5	adi2mcaRNA12577_R5	0	0	XP_022810231.1	38.5	5.6e-88	334.7	>XP_022810231.1 receptor-type tyrosine-protein phosphatase F-like [Stylophora pistillata]	0	0	0
adi2mcaRNA12577_R6	adi2mcaRNA12577_R6	0	0	XP_022810231.1	38.8	5e-89	338.2	>XP_022810231.1 receptor-type tyrosine-protein phosphatase F-like [Stylophora pistillata]	0	0	0
adi2mcaRNA12577_R9	adi2mcaRNA12577_R9	1.75741	7.70712	XP_020627529.1	41.3	9.9e-78	300.4	>XP_020627529.1 uncharacterized protein LOC110064772 [Orbicella faveolata]	0	0	0
adi2mcaRNA12580_R0	adi2mcaRNA12580_R0	0	0	XP_020625357.1	59.5	2.9e-35	159.1	>XP_020625357.1 uncharacterized protein LOC110062748 [Orbicella faveolata]	0	GO:0016021	integral component of membrane
adi2mcaRNA12604_R1	adi2mcaRNA12604_R1	0	0	XP_015758728.1	65.2	1.4e-157	565.8	>XP_015758728.1 PREDICTED: uncharacterized protein LOC107337993 [Acropora digitifera]	0	GO:0005615	extracellular space
adi2mcaRNA1261_R0	adi2mcaRNA1261_R0	483.611	284.626	XP_015759045.1	32.4	3e-73	286.6	>XP_015759045.1 PREDICTED: uncharacterized protein LOC107338323 [Acropora digitifera]	0	0	0
adi2mcaRNA12611_R0	adi2mcaRNA12611_R0	0	0	XP_015758692.1	76.3	2e-184	654.8	>XP_015758692.1 PREDICTED: peroxisomal acyl-coenzyme A oxidase 3-like [Acropora digitifera]	K00232	GO:0006631;GO:0016627;GO:0036094;GO:0043168;GO:0055114	fatty acid metabolic process;oxidoreductase activity, acting on the CH-CH group of donors;small molecule binding;anion binding;oxidation-reduction process
adi2mcaRNA12617_R0	adi2mcaRNA12617_R0	62.5443	124.568	XP_015758694.1	66.8	0	1443.3	>XP_015758694.1 PREDICTED: HEAT repeat-containing protein 6-like [Acropora digitifera]	0	0	0
adi2mcaRNA12617_R1	adi2mcaRNA12617_R1	25.7988	49.1112	XP_015758694.1	65	0	1384	>XP_015758694.1 PREDICTED: HEAT repeat-containing protein 6-like [Acropora digitifera]	0	0	0
adi2mcaRNA12628_R0	adi2mcaRNA12628_R0	508.908	577.772	XP_015758740.1	95.3	3.9e-259	903.3	>XP_015758740.1 PREDICTED: pre-mRNA-processing factor 19-like [Acropora digitifera]	K10599	GO:0000244;GO:0000245;GO:0000349;GO:0000974;GO:0001833;GO:0005662;GO:0005737;GO:0005811;GO:0005819;GO:0006303;GO:0008610;GO:0010498;GO:0016607;GO:0034450;GO:0034613;GO:0035861;GO:0042802;GO:0043518;GO:0045665;GO:0045666;GO:0048026;GO:0048711;GO:0070534;GO:0071006;GO:0071007;GO:0072422	spliceosomal tri-snRNP complex assembly;spliceosomal complex assembly;generation of catalytic spliceosome for first transesterification step;Prp19 complex;inner cell mass cell proliferation;DNA replication factor A complex;cytoplasm;lipid droplet;spindle;double-strand break repair via nonhomologous end joining;lipid biosynthetic process;proteasomal protein catabolic process;nuclear speck;ubiquiti…
adi2mcaRNA12641_R0	adi2mcaRNA12641_R0	1406.49	1581.01	XP_015758703.1	83.4	0	2844.3	>XP_015758703.1 PREDICTED: kinesin-like protein KIF21A [Acropora digitifera]	K10395	0	0
adi2mcaRNA12646_R3	adi2mcaRNA12646_R3	0	0	KXJ22701.1	63.1	2.3e-178	634.8	>KXJ22701.1 Pro-Pol polyprotein [Exaiptasia pallida]	0	0	0
adi2mcaRNA12646_R9	adi2mcaRNA12646_R9	0	0	KXJ22701.1	56.5	8.6e-166	593.2	>KXJ22701.1 Pro-Pol polyprotein [Exaiptasia pallida]	0	0	0
adi2mcaRNA12649_R0	adi2mcaRNA12649_R0	0	0	PFX17892.1	90	6.2e-104	387.5	>PFX17892.1 hypothetical protein AWC38_SpisGene17770 [Stylophora pistillata]	0	GO:0009987;GO:0065007	cellular process;biological regulation
adi2mcaRNA12649_R1	adi2mcaRNA12649_R1	0	0	PFX17892.1	85.6	9.8e-95	357.1	>PFX17892.1 hypothetical protein AWC38_SpisGene17770 [Stylophora pistillata]	0	GO:0009987	cellular process
adi2mcaRNA12652_R7	adi2mcaRNA12652_R7	0	0	XP_020622157.1	52.1	3.4e-59	238	>XP_020622157.1 uncharacterized protein LOC110059778 [Orbicella faveolata]	0	0	0
adi2mcaRNA12652_R8	adi2mcaRNA12652_R8	0	0	XP_020622157.1	45.8	8.6e-47	196.8	>XP_020622157.1 uncharacterized protein LOC110059778 [Orbicella faveolata]	0	0	0
adi2mcaRNA12652_R9	adi2mcaRNA12652_R9	0	0	XP_020622157.1	48.8	5.6e-54	220.7	>XP_020622157.1 uncharacterized protein LOC110059778 [Orbicella faveolata]	0	0	0
adi2mcaRNA12653_R1	adi2mcaRNA12653_R1	70.9844	6.8676	XP_015758790.1	93.9	1e-91	345.9	>XP_015758790.1 PREDICTED: uncharacterized protein LOC107338057 isoform X1 [Acropora digitifera]	0	0	0
adi2mcaRNA12656_R1	adi2mcaRNA12656_R1	0	0	XP_015758760.1	76.3	5.7e-85	323.6	>XP_015758760.1 PREDICTED: uncharacterized protein LOC107338025 [Acropora digitifera]	0	0	0
adi2mcaRNA12656_R2	adi2mcaRNA12656_R2	0	0	XP_015758760.1	74.4	1.4e-81	312	>XP_015758760.1 PREDICTED: uncharacterized protein LOC107338025 [Acropora digitifera]	0	0	0
adi2mcaRNA12659_R8	adi2mcaRNA12659_R8	5.18265	0	XP_020603908.1	48.7	7.6e-55	223.8	>XP_020603908.1 piggyBac transposable element-derived protein 4-like [Orbicella faveolata]	0	0	0
adi2mcaRNA12669_R0	adi2mcaRNA12669_R0	347.633	177.763	XP_015758796.1	96.7	3.5e-125	457.2	>XP_015758796.1 PREDICTED: 40S ribosomal protein S3 [Acropora digitifera]	K02985	GO:0003684;GO:0003723;GO:0003735;GO:0003906;GO:0005634;GO:0006281;GO:0006412;GO:0022627;GO:2001235	damaged DNA binding;RNA binding;structural constituent of ribosome;DNA-(apurinic or apyrimidinic site) endonuclease activity;nucleus;DNA repair;translation;cytosolic small ribosomal subunit;positive regulation of apoptotic signaling pathway
adi2mcaRNA12676_R1	adi2mcaRNA12676_R1	0	19.0391	XP_015758793.1	81	5.3e-126	460.3	>XP_015758793.1 PREDICTED: acyl-CoA synthetase family member 2, mitochondrial-like [Acropora digitifera]	0	GO:0003824	catalytic activity
adi2mcaRNA12677_R0	adi2mcaRNA12677_R0	46.5353	116.175	XP_015758772.1	71.8	2.3e-299	1037.3	>XP_015758772.1 PREDICTED: uncharacterized protein LOC107338037 [Acropora digitifera]	K04511	GO:0003712;GO:0005634;GO:0008270;GO:0030018	transcription coregulator activity;nucleus;zinc ion binding;Z disc
adi2mcaRNA12696_R7	adi2mcaRNA12696_R7	0	0	XP_015758777.1	58.4	1.3e-90	342.4	>XP_015758777.1 PREDICTED: ATP-dependent DNA helicase RecQ-like [Acropora digitifera]	0	GO:0005622;GO:0006259;GO:0051276;GO:0110165	intracellular;DNA metabolic process;chromosome organization;cellular anatomical entity
adi2mcaRNA12698_R7	adi2mcaRNA12698_R7	0	10.3763	XP_022807696.1	65.9	2.2e-58	235	>XP_022807696.1 uncharacterized protein LOC111344712 [Stylophora pistillata]	0	0	0
adi2mcaRNA12716_R2	adi2mcaRNA12716_R2	0.944183	0.363839	XP_015758817.1	63.9	0	1087	>XP_015758817.1 PREDICTED: uncharacterized protein LOC107338092 [Acropora digitifera]	0	GO:0016020	membrane
adi2mcaRNA12753_R0	adi2mcaRNA12753_R0	417.62	277.146	XP_015758868.1	75.9	2.9e-242	847.4	>XP_015758868.1 PREDICTED: spastin-like [Acropora digitifera]	K22766	GO:0000910;GO:0005634;GO:0005783;GO:0007275;GO:0008089;GO:0015630;GO:0015631;GO:0016887;GO:0019896;GO:0031090;GO:0031410;GO:0048522;GO:0051013;GO:0051259;GO:0061024;GO:1903047	cytokinesis;nucleus;endoplasmic reticulum;multicellular organism development;anterograde axonal transport;microtubule cytoskeleton;tubulin binding;ATPase activity;axonal transport of mitochondrion;organelle membrane;cytoplasmic vesicle;positive regulation of cellular process;microtubule severing;protein complex oligomerization;membrane organization;mitotic cell cycle process
adi2mcaRNA12754_R0	adi2mcaRNA12754_R0	742.569	678.53	XP_015758831.1	55.7	3e-285	990.7	>XP_015758831.1 PREDICTED: retinoid isomerohydrolase-like [Acropora digitifera]	K17913	GO:0008152;GO:0016702;GO:0043167	metabolic process;oxidoreductase activity, acting on single donors with incorporation of molecular oxygen, incorporation of two atoms of oxygen;ion binding
adi2mcaRNA12756_R0	adi2mcaRNA12756_R0	8.53981	13.4872	XP_015758872.1	75.1	5.7e-242	846.3	>XP_015758872.1 PREDICTED: uncharacterized protein LOC107338152 [Acropora digitifera]	0	0	0
adi2mcaRNA12756_R2	adi2mcaRNA12756_R2	5.49646	1.79919	XP_022788007.1	72.4	1.4e-243	851.7	>XP_022788007.1 uncharacterized protein LOC111327946 [Stylophora pistillata]	0	GO:0016021;GO:0019825;GO:0020037	integral component of membrane;oxygen binding;heme binding
adi2mcaRNA12756_R5	adi2mcaRNA12756_R5	12.1737	47.6209	XP_022787702.1	56.6	2.6e-189	671.4	>XP_022787702.1 uncharacterized protein LOC111327724 [Stylophora pistillata]	0	0	0
adi2mcaRNA12756_R7	adi2mcaRNA12756_R7	7.56802	22.8403	XP_022787702.1	57.7	2.6e-178	634.8	>XP_022787702.1 uncharacterized protein LOC111327724 [Stylophora pistillata]	0	0	0
adi2mcaRNA12758_R2	adi2mcaRNA12758_R2	0	0	XP_015758874.1	59.3	1.8e-74	288.9	>XP_015758874.1 PREDICTED: probable G-protein coupled receptor No9 [Acropora digitifera]	0	GO:0007165;GO:0110165	signal transduction;cellular anatomical entity
adi2mcaRNA12777_R0	adi2mcaRNA12777_R0	471.161	264.292	XP_015758889.1	64.3	1.6e-85	325.5	>XP_015758889.1 PREDICTED: ribonuclease Oy-like [Acropora digitifera]	K01166	0	0
adi2mcaRNA12830_R0	adi2mcaRNA12830_R0	731.901	268.336	XP_015758916.1	81.1	5.1e-128	466.8	>XP_015758916.1 PREDICTED: hydroxyacyl-coenzyme A dehydrogenase, mitochondrial-like [Acropora digitifera]	0	GO:0008152;GO:0016491	metabolic process;oxidoreductase activity
adi2mcaRNA12851_R1	adi2mcaRNA12851_R1	11.976	43.3534	XP_015758951.1	59.2	0	1766.1	>XP_015758951.1 PREDICTED: uncharacterized protein LOC107338231 isoform X1 [Acropora digitifera]	K00698	0	0
adi2mcaRNA12853_R2	adi2mcaRNA12853_R2	0	0	#N/A	#N/A	#N/A	#N/A	#N/A	0	0	0
adi2mcaRNA12853_R6	adi2mcaRNA12853_R6	0	0	#N/A	#N/A	#N/A	#N/A	#N/A	0	0	0
adi2mcaRNA12859_R2	adi2mcaRNA12859_R2	0	0	#N/A	#N/A	#N/A	#N/A	#N/A	0	0	0
adi2mcaRNA12859_R6	adi2mcaRNA12859_R6	0	0	#N/A	#N/A	#N/A	#N/A	#N/A	0	0	0
adi2mcaRNA12883_R0	adi2mcaRNA12883_R0	0	0	XP_015758969.1	92.9	0	1069.3	>XP_015758969.1 PREDICTED: probable ATP-dependent DNA helicase RecS [Acropora digitifera]	0	GO:0005622;GO:0006259;GO:0051276;GO:0110165	intracellular;DNA metabolic process;chromosome organization;cellular anatomical entity
adi2mcaRNA12883_R1	adi2mcaRNA12883_R1	0	0	XP_015758969.1	94.9	1.2e-287	998	>XP_015758969.1 PREDICTED: probable ATP-dependent DNA helicase RecS [Acropora digitifera]	0	GO:0005622;GO:0006259;GO:0051276;GO:0110165	intracellular;DNA metabolic process;chromosome organization;cellular anatomical entity
adi2mcaRNA12883_R2	adi2mcaRNA12883_R2	0	0	XP_015758969.1	68.8	1.7e-195	691.8	>XP_015758969.1 PREDICTED: probable ATP-dependent DNA helicase RecS [Acropora digitifera]	0	0	0
adi2mcaRNA12883_R3	adi2mcaRNA12883_R3	0	0	XP_015758969.1	46.6	2.1e-144	522.3	>XP_015758969.1 PREDICTED: probable ATP-dependent DNA helicase RecS [Acropora digitifera]	0	GO:0005622;GO:0006259;GO:0051276;GO:0110165	intracellular;DNA metabolic process;chromosome organization;cellular anatomical entity
adi2mcaRNA12883_R4	adi2mcaRNA12883_R4	0	0	XP_015758969.1	45	8.8e-143	516.9	>XP_015758969.1 PREDICTED: probable ATP-dependent DNA helicase RecS [Acropora digitifera]	0	GO:0005622;GO:0006259;GO:0051276;GO:0110165	intracellular;DNA metabolic process;chromosome organization;cellular anatomical entity
adi2mcaRNA12883_R5	adi2mcaRNA12883_R5	0	0	XP_015758969.1	47.1	9.7e-142	513.5	>XP_015758969.1 PREDICTED: probable ATP-dependent DNA helicase RecS [Acropora digitifera]	0	GO:0005622;GO:0006259;GO:0051276;GO:0110165	intracellular;DNA metabolic process;chromosome organization;cellular anatomical entity
adi2mcaRNA12883_R6	adi2mcaRNA12883_R6	0	0	XP_015758969.1	44	2e-139	505.8	>XP_015758969.1 PREDICTED: probable ATP-dependent DNA helicase RecS [Acropora digitifera]	0	GO:0005622;GO:0006259;GO:0051276;GO:0110165	intracellular;DNA metabolic process;chromosome organization;cellular anatomical entity
adi2mcaRNA12883_R7	adi2mcaRNA12883_R7	0	0	XP_015758969.1	46	1.5e-142	516.2	>XP_015758969.1 PREDICTED: probable ATP-dependent DNA helicase RecS [Acropora digitifera]	0	GO:0005622;GO:0006259;GO:0051276;GO:0110165	intracellular;DNA metabolic process;chromosome organization;cellular anatomical entity
adi2mcaRNA12883_R8	adi2mcaRNA12883_R8	0	0	XP_015758969.1	45.3	6e-139	504.2	>XP_015758969.1 PREDICTED: probable ATP-dependent DNA helicase RecS [Acropora digitifera]	0	GO:0005622;GO:0006259;GO:0051276;GO:0110165	intracellular;DNA metabolic process;chromosome organization;cellular anatomical entity
adi2mcaRNA12884_R1	adi2mcaRNA12884_R1	0	0	XP_015758970.1	82.6	5.2e-186	659.8	>XP_015758970.1 PREDICTED: uncharacterized protein LOC107338249 [Acropora digitifera]	0	0	0
adi2mcaRNA12884_R2	adi2mcaRNA12884_R2	0	0	XP_015758970.1	82.6	8.2e-184	652.5	>XP_015758970.1 PREDICTED: uncharacterized protein LOC107338249 [Acropora digitifera]	0	0	0
adi2mcaRNA12884_R4	adi2mcaRNA12884_R4	0	0	XP_015758970.1	61.4	4.6e-123	450.3	>XP_015758970.1 PREDICTED: uncharacterized protein LOC107338249 [Acropora digitifera]	0	0	0
adi2mcaRNA12884_R7	adi2mcaRNA12884_R7	0	0	XP_015758970.1	44.4	2.8e-90	342	>XP_015758970.1 PREDICTED: uncharacterized protein LOC107338249 [Acropora digitifera]	0	0	0
adi2mcaRNA12903_R0	adi2mcaRNA12903_R0	12.7646	26.5398	XP_015758979.1	67.6	0	2027.3	>XP_015758979.1 PREDICTED: DNA-directed RNA polymerase I subunit RPA1-like [Acropora digitifera]	K02999	GO:0003899;GO:0005488;GO:0005634;GO:0006351	DNA-directed 5'-3' RNA polymerase activity;binding;nucleus;transcription, DNA-templated
adi2mcaRNA12904_R5	adi2mcaRNA12904_R5	0	0	XP_015758997.1	76.2	5.7e-124	453.4	>XP_015758997.1 PREDICTED: tyrosine-protein kinase receptor Tie-1-like [Acropora digitifera]	0	GO:0004714;GO:0005509;GO:0005524;GO:0005887;GO:0007169;GO:0007275;GO:0018108;GO:0033674;GO:0043235	transmembrane receptor protein tyrosine kinase activity;calcium ion binding;ATP binding;integral component of plasma membrane;transmembrane receptor protein tyrosine kinase signaling pathway;multicellular organism development;peptidyl-tyrosine phosphorylation;positive regulation of kinase activity;receptor complex
adi2mcaRNA12904_R6	adi2mcaRNA12904_R6	0	0	XP_015758997.1	80.6	2.3e-75	291.6	>XP_015758997.1 PREDICTED: tyrosine-protein kinase receptor Tie-1-like [Acropora digitifera]	0	GO:0004714;GO:0005509;GO:0005524;GO:0005887;GO:0007169;GO:0007275;GO:0018108;GO:0033674;GO:0043235	transmembrane receptor protein tyrosine kinase activity;calcium ion binding;ATP binding;integral component of plasma membrane;transmembrane receptor protein tyrosine kinase signaling pathway;multicellular organism development;peptidyl-tyrosine phosphorylation;positive regulation of kinase activity;receptor complex
adi2mcaRNA12904_R7	adi2mcaRNA12904_R7	0	0	XP_020619355.1	67.2	5.8e-100	373.6	>XP_020619355.1 angiopoietin-1 receptor-like [Orbicella faveolata]	0	GO:0004714;GO:0005524;GO:0016021;GO:0018108	transmembrane receptor protein tyrosine kinase activity;ATP binding;integral component of membrane;peptidyl-tyrosine phosphorylation
adi2mcaRNA12907_R3	adi2mcaRNA12907_R3	16.6788	10.7797	XP_015757063.1	55.8	3.9e-36	161	>XP_015757063.1 PREDICTED: uncharacterized protein LOC107336505 isoform X2 [Acropora digitifera]	0	0	0
adi2mcaRNA12910_R2	adi2mcaRNA12910_R2	0	0	XP_015759004.1	62.7	3.8e-102	380.9	>XP_015759004.1 PREDICTED: inactive pancreatic lipase-related protein 1-like isoform X1 [Acropora digitifera]	0	0	0
adi2mcaRNA12933_R1	adi2mcaRNA12933_R1	0	1.94047	XP_015758984.1	76	3.1e-94	354.8	>XP_015758984.1 PREDICTED: kinesin-like protein Klp10A [Acropora digitifera]	0	GO:0003777;GO:0005524;GO:0005874;GO:0007018;GO:0008017	microtubule motor activity;ATP binding;microtubule;microtubule-based movement;microtubule binding
adi2mcaRNA12942_R0	adi2mcaRNA12942_R0	0	3.10476	XP_015758986.1	65.8	2.2e-66	261.5	>XP_015758986.1 PREDICTED: ribosome production factor 1-like [Acropora digitifera]	K14846	GO:0000460;GO:0000470;GO:0005730;GO:0030687	maturation of 5.8S rRNA;maturation of LSU-rRNA;nucleolus;preribosome, large subunit precursor
adi2mcaRNA12944_R1	adi2mcaRNA12944_R1	0	0	XP_015759023.1	42.5	2.6e-74	289.3	>XP_015759023.1 PREDICTED: uncharacterized protein LOC107338306 [Acropora digitifera]	0	0	0
adi2mcaRNA12948_R0	adi2mcaRNA12948_R0	6.82776	23.6226	XP_015759029.1	52.4	0	1158.7	>XP_015759029.1 PREDICTED: uncharacterized protein LOC107338309 isoform X3 [Acropora digitifera]	0	0	0
adi2mcaRNA12948_R1	adi2mcaRNA12948_R1	22.4229	25.6022	XP_015759029.1	48.4	1.6e-294	1021.9	>XP_015759029.1 PREDICTED: uncharacterized protein LOC107338309 isoform X3 [Acropora digitifera]	0	0	0
adi2mcaRNA12953_R0	adi2mcaRNA12953_R0	71.0606	57.1812	XP_015759031.1	89.7	6.1e-204	719.5	>XP_015759031.1 PREDICTED: uncharacterized protein C1orf177 homolog [Acropora digitifera]	0	0	0
adi2mcaRNA12953_R1	adi2mcaRNA12953_R1	136.013	61.1398	XP_020631690.1	87.2	4.6e-201	709.9	>XP_020631690.1 lymphocyte expansion molecule-like [Orbicella faveolata]	0	0	0
adi2mcaRNA12954_R0	adi2mcaRNA12954_R0	0	0	#N/A	#N/A	#N/A	#N/A	#N/A	0	0	0
adi2mcaRNA12954_R1	adi2mcaRNA12954_R1	0	0	#N/A	#N/A	#N/A	#N/A	#N/A	0	0	0
adi2mcaRNA12954_R6	adi2mcaRNA12954_R6	0	0	#N/A	#N/A	#N/A	#N/A	#N/A	0	0	0
adi2mcaRNA12954_R8	adi2mcaRNA12954_R8	0	0	#N/A	#N/A	#N/A	#N/A	#N/A	0	0	0
adi2mcaRNA12959_R0	adi2mcaRNA12959_R0	54.4514	55.7148	XP_015759033.1	65.8	7.9e-151	543.1	>XP_015759033.1 PREDICTED: uncharacterized protein LOC107338313 [Acropora digitifera]	0	GO:0005794;GO:0006486;GO:0008194;GO:0008378;GO:0016020	Golgi apparatus;protein glycosylation;UDP-glycosyltransferase activity;galactosyltransferase activity;membrane
adi2mcaRNA12974_R0	adi2mcaRNA12974_R0	43.0359	110.498	XP_015758990.1	71.9	0	1882.5	>XP_015758990.1 PREDICTED: cyclin-G-associated kinase-like [Acropora digitifera]	K08855	GO:0003824;GO:0005737;GO:0006464;GO:0006796;GO:0030276;GO:0031982;GO:0043231;GO:0072318;GO:0072583	catalytic activity;cytoplasm;cellular protein modification process;phosphate-containing compound metabolic process;clathrin binding;vesicle;intracellular membrane-bounded organelle;clathrin coat disassembly;clathrin-dependent endocytosis
adi2mcaRNA12975_R0	adi2mcaRNA12975_R0	218.671	204.062	XP_015758991.1	62.3	7.6e-140	506.9	>XP_015758991.1 PREDICTED: uncharacterized protein LOC107338274 [Acropora digitifera]	0	GO:0016740	transferase activity
adi2mcaRNA12987_R1	adi2mcaRNA12987_R1	0	0	XP_015747802.1	98.1	5.8e-139	503.1	>XP_015747802.1 PREDICTED: uncharacterized protein LOC107327567 [Acropora digitifera]	0	GO:0008152;GO:0009987;GO:0016020;GO:0016740	metabolic process;cellular process;membrane;transferase activity
adi2mcaRNA12987_R6	adi2mcaRNA12987_R6	0	0	XP_015759063.1	98.8	6.8e-140	506.1	>XP_015759063.1 PREDICTED: uncharacterized protein LOC107338344 [Acropora digitifera]	0	GO:0008152;GO:0009987;GO:0016020;GO:0016740	metabolic process;cellular process;membrane;transferase activity
adi2mcaRNA12993_R0	adi2mcaRNA12993_R0	3.35075	9.64317	XP_015759052.1	76	6e-99	370.9	>XP_015759052.1 PREDICTED: uncharacterized protein LOC107338332 [Acropora digitifera]	0	0	0
adi2mcaRNA12993_R1	adi2mcaRNA12993_R1	0	0.774153	XP_015765238.1	97.6	3.7e-134	488	>XP_015765238.1 PREDICTED: uncharacterized protein LOC107344139 [Acropora digitifera]	0	GO:0009987	cellular process
adi2mcaRNA12993_R4	adi2mcaRNA12993_R4	0	7.84449	XP_015759052.1	64.1	6.3e-82	313.5	>XP_015759052.1 PREDICTED: uncharacterized protein LOC107338332 [Acropora digitifera]	0	0	0
adi2mcaRNA12993_R5	adi2mcaRNA12993_R5	0	0	XP_015759052.1	63.4	6.8e-81	310.1	>XP_015759052.1 PREDICTED: uncharacterized protein LOC107338332 [Acropora digitifera]	0	0	0
adi2mcaRNA13_R1	adi2mcaRNA13_R1	1.71686	0	XP_015757096.1	75.7	0	3511.5	>XP_015757096.1 PREDICTED: uncharacterized protein LOC107336222 [Acropora digitifera]	0	GO:0003676	nucleic acid binding
adi2mcaRNA13008_R0	adi2mcaRNA13008_R0	131.286	79.5862	XP_022788508.1	91.1	1.5e-304	1054.3	>XP_022788508.1 uncharacterized protein LOC111328364 [Stylophora pistillata]	0	GO:0004842;GO:0016567;GO:0019005;GO:0031146	ubiquitin-protein transferase activity;protein ubiquitination;SCF ubiquitin ligase complex;SCF-dependent proteasomal ubiquitin-dependent protein catabolic process
adi2mcaRNA13010_R0	adi2mcaRNA13010_R0	0	0	XP_015759055.1	84.9	1.7e-65	259.2	>XP_015759055.1 PREDICTED: F-box/LRR-repeat protein 20-like [Acropora digitifera]	0	0	0
adi2mcaRNA13010_R9	adi2mcaRNA13010_R9	0	0	XP_015759055.1	84.6	8.5e-61	243.4	>XP_015759055.1 PREDICTED: F-box/LRR-repeat protein 20-like [Acropora digitifera]	0	0	0
adi2mcaRNA13017_R1	adi2mcaRNA13017_R1	0	0	XP_015759088.1	58.4	1.3e-150	542.7	>XP_015759088.1 PREDICTED: uncharacterized protein LOC107338370 [Acropora digitifera]	0	0	0
adi2mcaRNA13020_R0	adi2mcaRNA13020_R0	0	0	XP_015759092.1	53.7	6.8e-41	176.8	>XP_015759092.1 PREDICTED: uncharacterized protein LOC107338373 [Acropora digitifera]	0	0	0
adi2mcaRNA13035_R0	adi2mcaRNA13035_R0	1554.98	3370.35	XP_015759104.1	65.6	1.7e-172	615.1	>XP_015759104.1 PREDICTED: WD repeat-containing protein 1-A-like [Acropora digitifera]	0	GO:0003779;GO:0005737;GO:0005884;GO:0016020;GO:0030042;GO:0071944	actin binding;cytoplasm;actin filament;membrane;actin filament depolymerization;cell periphery
adi2mcaRNA13039_R0	adi2mcaRNA13039_R0	17.3553	6.34396	XP_015759058.1	77.9	1.6e-30	141.7	>XP_015759058.1 PREDICTED: probable 28S ribosomal protein S26, mitochondrial [Acropora digitifera]	0	GO:0005763	mitochondrial small ribosomal subunit
adi2mcaRNA13043_R0	adi2mcaRNA13043_R0	657.038	823.198	XP_015759109.1	81.3	4.7e-205	723.8	>XP_015759109.1 PREDICTED: fidgetin-like protein 1 [Acropora digitifera]	K22766	GO:0005524;GO:0005634;GO:0008568;GO:0010569;GO:0031122;GO:0051013	ATP binding;nucleus;microtubule-severing ATPase activity;regulation of double-strand break repair via homologous recombination;cytoplasmic microtubule organization;microtubule severing
adi2mcaRNA13045_R0	adi2mcaRNA13045_R0	0	0	XP_015759060.1	67.7	1.5e-98	369	>XP_015759060.1 PREDICTED: chymotrypsin-like elastase family member 3B [Acropora digitifera]	0	GO:0004252;GO:0005615;GO:0006508	serine-type endopeptidase activity;extracellular space;proteolysis
adi2mcaRNA13050_R2	adi2mcaRNA13050_R2	0	0	XP_015759062.1	55.6	7.6e-71	276.6	>XP_015759062.1 PREDICTED: uncharacterized protein LOC107338342 [Acropora digitifera]	0	0	0
adi2mcaRNA13053_R1	adi2mcaRNA13053_R1	8.34391	0	XP_015759115.1	65.8	1.6e-80	308.9	>XP_015759115.1 PREDICTED: pyrroline-5-carboxylate reductase 3-like [Acropora digitifera]	K00286	GO:0008652	cellular amino acid biosynthetic process
adi2mcaRNA13066_R0	adi2mcaRNA13066_R0	42.2787	43.9181	XP_015759118.1	65.9	7.1e-224	786.2	>XP_015759118.1 PREDICTED: coiled-coil domain-containing protein 81-like [Acropora digitifera]	0	0	0
adi2mcaRNA13066_R2	adi2mcaRNA13066_R2	0	0	XP_015759118.1	72.4	2.1e-170	608.6	>XP_015759118.1 PREDICTED: coiled-coil domain-containing protein 81-like [Acropora digitifera]	0	0	0
adi2mcaRNA13068_R0	adi2mcaRNA13068_R0	0	0	XP_015759120.1	68.9	6.2e-215	756.5	>XP_015759120.1 PREDICTED: MCM domain-containing protein 2-like [Acropora digitifera]	0	GO:0097159;GO:1901363	organic cyclic compound binding;heterocyclic compound binding
adi2mcaRNA13068_R1	adi2mcaRNA13068_R1	0	0	XP_015759120.1	64.9	3.8e-198	700.7	>XP_015759120.1 PREDICTED: MCM domain-containing protein 2-like [Acropora digitifera]	0	0	0
adi2mcaRNA13069_R1	adi2mcaRNA13069_R1	0	0	XP_020626607.1	60.5	2.1e-185	659.4	>XP_020626607.1 transient receptor potential cation channel subfamily A member 1 homolog [Orbicella faveolata]	K04984	GO:0006810	transport
adi2mcaRNA13083_R0	adi2mcaRNA13083_R0	1005.36	383.548	XP_015759149.1	80.1	6.1e-136	493.8	>XP_015759149.1 PREDICTED: peptidyl-prolyl cis-trans isomerase-like 4 [Acropora digitifera]	K12735	GO:0000413;GO:0003723;GO:0003755;GO:0005634;GO:1901407	protein peptidyl-prolyl isomerization;RNA binding;peptidyl-prolyl cis-trans isomerase activity;nucleus;regulation of phosphorylation of RNA polymerase II C-terminal domain
adi2mcaRNA13091_R1	adi2mcaRNA13091_R1	0	0	XP_015759158.1	59.2	5.5e-141	510.8	>XP_015759158.1 PREDICTED: E3 ubiquitin-protein ligase TRIM71-like [Acropora digitifera]	0	0	0
adi2mcaRNA13094_R0	adi2mcaRNA13094_R0	23.5397	18.7246	XP_015759160.1	73.7	3.1e-44	188	>XP_015759160.1 PREDICTED: uncharacterized protein LOC107338446 [Acropora digitifera]	K20186	GO:0031083	BLOC-1 complex
adi2mcaRNA13094_R1	adi2mcaRNA13094_R1	0	0	XP_015759160.1	73.7	3.1e-44	188	>XP_015759160.1 PREDICTED: uncharacterized protein LOC107338446 [Acropora digitifera]	K20186	GO:0031083	BLOC-1 complex
adi2mcaRNA13096_R2	adi2mcaRNA13096_R2	0	0	XP_020625568.1	77.9	1.1e-251	878.6	>XP_020625568.1 uncharacterized protein LOC110062965 [Orbicella faveolata]	0	GO:0005251;GO:0008076;GO:0071805	delayed rectifier potassium channel activity;voltage-gated potassium channel complex;potassium ion transmembrane transport
adi2mcaRNA13096_R4	adi2mcaRNA13096_R4	31.1542	11.2914	XP_020625568.1	73.2	4.3e-229	803.5	>XP_020625568.1 uncharacterized protein LOC110062965 [Orbicella faveolata]	0	GO:0005251;GO:0008076;GO:0071805	delayed rectifier potassium channel activity;voltage-gated potassium channel complex;potassium ion transmembrane transport
adi2mcaRNA13096_R7	adi2mcaRNA13096_R7	28.4691	21.9065	XP_020625492.1	67.4	3.8e-180	641	>XP_020625492.1 uncharacterized protein LOC110062887 [Orbicella faveolata]	0	GO:0005216;GO:0016021;GO:0022836;GO:0034220	ion channel activity;integral component of membrane;gated channel activity;ion transmembrane transport
adi2mcaRNA13109_R0	adi2mcaRNA13109_R0	2862.87	5255.58	XP_015759126.1	87.7	9e-149	535.8	>XP_015759126.1 PREDICTED: splicing factor 3A subunit 3-like [Acropora digitifera]	K12827	GO:0000398;GO:0003723;GO:0005681	mRNA splicing, via spliceosome;RNA binding;spliceosomal complex
adi2mcaRNA13120_R0	adi2mcaRNA13120_R0	0	0	XP_015759186.1	74.8	1.1e-80	309.3	>XP_015759186.1 PREDICTED: fibroblast growth factor 1-like [Acropora digitifera]	0	0	0
adi2mcaRNA13120_R1	adi2mcaRNA13120_R1	0	0	XP_015759186.1	74.8	1.1e-80	309.3	>XP_015759186.1 PREDICTED: fibroblast growth factor 1-like [Acropora digitifera]	0	0	0
adi2mcaRNA13120_R2	adi2mcaRNA13120_R2	0	0	XP_015759186.1	73.9	2.1e-79	305.1	>XP_015759186.1 PREDICTED: fibroblast growth factor 1-like [Acropora digitifera]	0	0	0
adi2mcaRNA13120_R3	adi2mcaRNA13120_R3	0	0	XP_015759186.1	71.5	1.6e-79	305.4	>XP_015759186.1 PREDICTED: fibroblast growth factor 1-like [Acropora digitifera]	0	0	0
adi2mcaRNA13126_R1	adi2mcaRNA13126_R1	0	0	XP_015759181.1	61.3	2.6e-83	318.2	>XP_015759181.1 PREDICTED: uncharacterized protein LOC107338458 [Acropora digitifera]	0	0	0
adi2mcaRNA13127_R1	adi2mcaRNA13127_R1	0	0	XP_015759179.1	61	0	1077.4	>XP_015759179.1 PREDICTED: AT-rich interactive domain-containing protein 1B-like [Acropora digitifera]	K11653	GO:0005634	nucleus
adi2mcaRNA13128_R2	adi2mcaRNA13128_R2	0	0	XP_015759180.1	60.5	3.9e-83	318.5	>XP_015759180.1 PREDICTED: myb-like protein I [Acropora digitifera]	0	0	0
adi2mcaRNA1314_R0	adi2mcaRNA1314_R0	5.19477	0	XP_015759404.1	79	0	1075.8	>XP_015759404.1 PREDICTED: sodium/potassium/calcium exchanger 4-like isoform X1 [Acropora digitifera]	0	GO:0016021;GO:0030001;GO:0098662	integral component of membrane;metal ion transport;inorganic cation transmembrane transport
adi2mcaRNA13141_R1	adi2mcaRNA13141_R1	0	0	XP_015763296.1	30.2	3e-19	105.1	>XP_015763296.1 PREDICTED: uncharacterized protein LOC107342326 [Acropora digitifera]	0	0	0
adi2mcaRNA13151_R0	adi2mcaRNA13151_R0	111.899	75.2685	XP_015759196.1	80	0	2268.8	>XP_015759196.1 PREDICTED: neuralized-like protein 4 [Acropora digitifera]	K16777	0	0
adi2mcaRNA13157_R0	adi2mcaRNA13157_R0	4102.27	2848.62	XP_015759198.1	77.4	1.7e-134	488.4	>XP_015759198.1 PREDICTED: alpha-enolase-like [Acropora digitifera]	K01689	0	0
adi2mcaRNA13176_R1	adi2mcaRNA13176_R1	591.767	374.451	EGW04818.1	75.7	5.8e-07	65.1	>EGW04818.1 WD repeat-containing protein 69 [Cricetulus griseus]	K19760	0	0
adi2mcaRNA13176_R2	adi2mcaRNA13176_R2	1040.99	606.149	OCT81087.1	35.6	5.4e-11	78.2	>OCT81087.1 hypothetical protein XELAEV_18027900mg [Xenopus laevis]	0	0	0
adi2mcaRNA13181_R2	adi2mcaRNA13181_R2	0	3.69079	XP_015776281.1	51.1	3.8e-68	268.1	>XP_015776281.1 PREDICTED: trace amine-associated receptor 7c-like [Acropora digitifera]	0	0	0
adi2mcaRNA13181_R3	adi2mcaRNA13181_R3	0	0	XP_015779403.1	53.8	4.6e-71	277.7	>XP_015779403.1 PREDICTED: lysophosphatidic acid receptor 1-A-like [Acropora digitifera]	0	0	0
adi2mcaRNA13184_R7	adi2mcaRNA13184_R7	0	0	XP_015779403.1	54.3	6.3e-71	277.3	>XP_015779403.1 PREDICTED: lysophosphatidic acid receptor 1-A-like [Acropora digitifera]	0	0	0
adi2mcaRNA13197_R4	adi2mcaRNA13197_R4	0	0	XP_020632330.1	45.7	3.2e-29	138.3	>XP_020632330.1 uncharacterized protein LOC110069185 [Orbicella faveolata]	0	0	0
adi2mcaRNA132_R0	adi2mcaRNA132_R0	3981.17	9133.12	XP_015763938.1	93.8	3.3e-39	171	>XP_015763938.1 PREDICTED: probable splicing factor, arginine/serine-rich 6 [Acropora digitifera]	0	GO:0000381;GO:0003723;GO:0008270;GO:0016607;GO:0045292	regulation of alternative mRNA splicing, via spliceosome;RNA binding;zinc ion binding;nuclear speck;mRNA cis splicing, via spliceosome
adi2mcaRNA13200_R1	adi2mcaRNA13200_R1	0	0	XP_015759246.1	69.6	2e-163	585.1	>XP_015759246.1 PREDICTED: putative nuclease HARBI1 [Acropora digitifera]	K23222	0	0
adi2mcaRNA13201_R2	adi2mcaRNA13201_R2	0	0	XP_015759211.1	86.1	7.9e-51	209.5	>XP_015759211.1 PREDICTED: uncharacterized protein LOC107338491 [Acropora digitifera]	0	GO:0006807;GO:0016301;GO:0016310;GO:0044238;GO:0044260	nitrogen compound metabolic process;kinase activity;phosphorylation;primary metabolic process;cellular macromolecule metabolic process
adi2mcaRNA13201_R3	adi2mcaRNA13201_R3	0	0	XP_015759211.1	83.2	2.7e-47	198	>XP_015759211.1 PREDICTED: uncharacterized protein LOC107338491 [Acropora digitifera]	0	0	0
adi2mcaRNA13201_R6	adi2mcaRNA13201_R6	0	0	XP_015759211.1	66.7	1e-42	182.6	>XP_015759211.1 PREDICTED: uncharacterized protein LOC107338491 [Acropora digitifera]	0	0	0
adi2mcaRNA13201_R8	adi2mcaRNA13201_R8	0	0	XP_015759211.1	59.9	1.3e-28	135.6	>XP_015759211.1 PREDICTED: uncharacterized protein LOC107338491 [Acropora digitifera]	0	GO:0004672;GO:0005524;GO:0006468	protein kinase activity;ATP binding;protein phosphorylation
adi2mcaRNA13202_R0	adi2mcaRNA13202_R0	0	0	XP_015759212.1	84.4	2.4e-303	1050.4	>XP_015759212.1 PREDICTED: uncharacterized protein LOC107338493 [Acropora digitifera]	0	GO:0005488;GO:0015074	binding;DNA integration
adi2mcaRNA13202_R4	adi2mcaRNA13202_R4	0	0	XP_015759212.1	76.4	1.5e-234	821.6	>XP_015759212.1 PREDICTED: uncharacterized protein LOC107338493 [Acropora digitifera]	0	GO:0006807;GO:0016301;GO:0016310;GO:0044238;GO:0044260;GO:0097159;GO:1901363	nitrogen compound metabolic process;kinase activity;phosphorylation;primary metabolic process;cellular macromolecule metabolic process;organic cyclic compound binding;heterocyclic compound binding
adi2mcaRNA13202_R5	adi2mcaRNA13202_R5	0	0	XP_015759212.1	78.4	7.4e-245	855.9	>XP_015759212.1 PREDICTED: uncharacterized protein LOC107338493 [Acropora digitifera]	0	GO:0005488;GO:0044237	binding;cellular metabolic process
adi2mcaRNA13202_R6	adi2mcaRNA13202_R6	0	0	XP_015759212.1	73.1	2.3e-216	761.5	>XP_015759212.1 PREDICTED: uncharacterized protein LOC107338493 [Acropora digitifera]	0	GO:0006259;GO:0016772	DNA metabolic process;transferase activity, transferring phosphorus-containing groups
adi2mcaRNA13214_R2	adi2mcaRNA13214_R2	0	0.277211	XP_020601367.1	84.9	0	1691.8	>XP_020601367.1 putative leucine-rich repeat-containing protein DDB_G0281931 [Orbicella faveolata]	0	0	0
adi2mcaRNA13226_R0	adi2mcaRNA13226_R0	0.398964	0.784769	XP_015759282.1	41.4	1.7e-190	677.2	>XP_015759282.1 PREDICTED: serine-rich adhesin for platelets-like [Acropora digitifera]	0	0	0
adi2mcaRNA13228_R0	adi2mcaRNA13228_R0	26.8786	24.298	XP_015759259.1	60.6	4.9e-188	667.2	>XP_015759259.1 PREDICTED: stimulated by retinoic acid gene 6 protein homolog [Acropora digitifera]	K23088	GO:0016020	membrane
adi2mcaRNA13238_R0	adi2mcaRNA13238_R0	0	0	XP_015759261.1	67.8	3.8e-88	334.3	>XP_015759261.1 PREDICTED: melanocyte-stimulating hormone receptor-like [Acropora digitifera]	0	0	0
adi2mcaRNA13250_R0	adi2mcaRNA13250_R0	0	0.400946	XP_015759298.1	94.2	4.1e-286	993.4	>XP_015759298.1 PREDICTED: E3 ubiquitin-protein ligase TRIM71-like [Acropora digitifera]	K12035	GO:0000209;GO:0008270;GO:0043161;GO:0061630	protein polyubiquitination;zinc ion binding;proteasome-mediated ubiquitin-dependent protein catabolic process;ubiquitin protein ligase activity
adi2mcaRNA1326_R0	adi2mcaRNA1326_R0	183.386	261.815	XP_015758708.1	82	2.1e-123	452.2	>XP_015758708.1 PREDICTED: autophagy-related protein 16-1-like [Acropora digitifera]	K17890	GO:0000045;GO:0000421	autophagosome assembly;autophagosome membrane
adi2mcaRNA13261_R3	adi2mcaRNA13261_R3	0	0	XP_015759312.1	37.7	2.5e-214	755.4	>XP_015759312.1 PREDICTED: uncharacterized protein LOC107338580 isoform X2 [Acropora digitifera]	0	0	0
adi2mcaRNA13261_R4	adi2mcaRNA13261_R4	0	0	XP_015759312.1	36.8	3.3e-206	728.4	>XP_015759312.1 PREDICTED: uncharacterized protein LOC107338580 isoform X2 [Acropora digitifera]	0	0	0
adi2mcaRNA13261_R6	adi2mcaRNA13261_R6	0	0	XP_015759312.1	37	1.4e-170	610.1	>XP_015759312.1 PREDICTED: uncharacterized protein LOC107338580 isoform X2 [Acropora digitifera]	0	0	0
adi2mcaRNA13279_R2	adi2mcaRNA13279_R2	0	0.582973	XP_011671211.1	52	4.7e-246	860.5	>XP_011671211.1 PREDICTED: uncharacterized protein K02A2.6-like [Strongylocentrotus purpuratus]	0	0	0
adi2mcaRNA13279_R3	adi2mcaRNA13279_R3	0	0	KXJ27739.1	58.1	4.8e-267	930.2	>KXJ27739.1 Retrovirus-related Pol polyprotein from transposon 17.6 [Exaiptasia pallida]	0	0	0
adi2mcaRNA13279_R4	adi2mcaRNA13279_R4	0	0	XP_011671211.1	52.4	1.7e-254	888.6	>XP_011671211.1 PREDICTED: uncharacterized protein K02A2.6-like [Strongylocentrotus purpuratus]	0	0	0
adi2mcaRNA13279_R5	adi2mcaRNA13279_R5	4.99866	0	XP_011671211.1	50.3	3.5e-236	827.8	>XP_011671211.1 PREDICTED: uncharacterized protein K02A2.6-like [Strongylocentrotus purpuratus]	0	0	0
adi2mcaRNA13288_R9	adi2mcaRNA13288_R9	0	0	XP_015748231.1	42.7	1.7e-43	186	>XP_015748231.1 PREDICTED: neuropeptide FF receptor 2-like [Acropora digitifera]	0	0	0
adi2mcaRNA13289_R5	adi2mcaRNA13289_R5	0	0	XP_015759319.1	55.8	1.1e-37	165.6	>XP_015759319.1 PREDICTED: inhibitor of growth protein 2-like [Acropora digitifera]	0	0	0
adi2mcaRNA13289_R8	adi2mcaRNA13289_R8	0	0	XP_015759319.1	50.9	8.2e-10	73.2	>XP_015759319.1 PREDICTED: inhibitor of growth protein 2-like [Acropora digitifera]	0	0	0
adi2mcaRNA13290_R0	adi2mcaRNA13290_R0	0	0	XP_015759337.1	84.6	0	1659.8	>XP_015759337.1 PREDICTED: uncharacterized protein LOC107338616 isoform X1 [Acropora digitifera]	0	0	0
adi2mcaRNA13290_R3	adi2mcaRNA13290_R3	0	0	XP_015759337.1	85.1	0	1482.6	>XP_015759337.1 PREDICTED: uncharacterized protein LOC107338616 isoform X1 [Acropora digitifera]	0	0	0
adi2mcaRNA13290_R5	adi2mcaRNA13290_R5	0	0	XP_015759337.1	50.9	0	1148.3	>XP_015759337.1 PREDICTED: uncharacterized protein LOC107338616 isoform X1 [Acropora digitifera]	0	0	0
adi2mcaRNA13290_R6	adi2mcaRNA13290_R6	0	0	XP_015759337.1	51.6	0	1152.9	>XP_015759337.1 PREDICTED: uncharacterized protein LOC107338616 isoform X1 [Acropora digitifera]	0	0	0
adi2mcaRNA13290_R7	adi2mcaRNA13290_R7	0	0	XP_015759337.1	50.8	0	1142.5	>XP_015759337.1 PREDICTED: uncharacterized protein LOC107338616 isoform X1 [Acropora digitifera]	0	0	0
adi2mcaRNA13290_R8	adi2mcaRNA13290_R8	0	0	XP_015759337.1	50.8	0	1142.9	>XP_015759337.1 PREDICTED: uncharacterized protein LOC107338616 isoform X1 [Acropora digitifera]	0	0	0
adi2mcaRNA13290_R9	adi2mcaRNA13290_R9	0	0	XP_015759337.1	50.8	0	1142.1	>XP_015759337.1 PREDICTED: uncharacterized protein LOC107338616 isoform X1 [Acropora digitifera]	0	0	0
adi2mcaRNA13292_R4	adi2mcaRNA13292_R4	0	0	XP_015759338.1	70.4	0	1264.6	>XP_015759338.1 PREDICTED: uncharacterized protein LOC107338616 isoform X2 [Acropora digitifera]	0	0	0
adi2mcaRNA13298_R1	adi2mcaRNA13298_R1	0	3.83032	XP_015771479.1	72.7	2.8e-17	97.8	>XP_015771479.1 PREDICTED: uncharacterized protein LOC107349807 [Acropora digitifera]	0	0	0
adi2mcaRNA13300_R9	adi2mcaRNA13300_R9	1.39779	0	XP_020602666.1	67.1	3.5e-181	644.4	>XP_020602666.1 sacsin-like isoform X1 [Orbicella faveolata]	K17592	0	0
adi2mcaRNA13304_R0	adi2mcaRNA13304_R0	0	0	XP_020612464.1	82.6	7.5e-86	326.2	>XP_020612464.1 uncharacterized protein LOC110050834 isoform X1 [Orbicella faveolata]	0	0	0
adi2mcaRNA13304_R1	adi2mcaRNA13304_R1	0	0	XP_015759324.1	59	4e-27	130.2	>XP_015759324.1 PREDICTED: uncharacterized protein LOC107338599 [Acropora digitifera]	0	0	0
adi2mcaRNA13304_R3	adi2mcaRNA13304_R3	0	0	XP_015759324.1	57.1	2.6e-26	127.5	>XP_015759324.1 PREDICTED: uncharacterized protein LOC107338599 [Acropora digitifera]	0	0	0
adi2mcaRNA13309_R3	adi2mcaRNA13309_R3	0	0	XP_015759351.1	66.7	1.5e-36	161.8	>XP_015759351.1 PREDICTED: uncharacterized protein LOC107338629 [Acropora digitifera]	0	0	0
adi2mcaRNA13309_R5	adi2mcaRNA13309_R5	0	0	XP_015759351.1	64.5	1.1e-27	132.1	>XP_015759351.1 PREDICTED: uncharacterized protein LOC107338629 [Acropora digitifera]	0	0	0
adi2mcaRNA13309_R6	adi2mcaRNA13309_R6	0	0	XP_015759351.1	55	7.7e-21	109.4	>XP_015759351.1 PREDICTED: uncharacterized protein LOC107338629 [Acropora digitifera]	0	0	0
adi2mcaRNA13313_R0	adi2mcaRNA13313_R0	0	0	PFX13584.1	80.5	6.9e-193	682.9	>PFX13584.1 Retrovirus-related Pol polyprotein [Stylophora pistillata]	0	GO:0003676;GO:0003899;GO:0004190;GO:0005634;GO:0005758;GO:0006351;GO:0006508;GO:0009055;GO:0015074;GO:0016021;GO:0016226;GO:0022900;GO:0046872;GO:0051537;GO:0051539	nucleic acid binding;DNA-directed 5'-3' RNA polymerase activity;aspartic-type endopeptidase activity;nucleus;mitochondrial intermembrane space;transcription, DNA-templated;proteolysis;electron transfer activity;DNA integration;integral component of membrane;iron-sulfur cluster assembly;electron transport chain;metal ion binding;2 iron, 2 sulfur cluster binding;4 iron, 4 sulfur cluster binding
adi2mcaRNA13313_R4	adi2mcaRNA13313_R4	0	0	PFX21834.1	58.7	2.8e-43	184.5	>PFX21834.1 Anamorsin [Stylophora pistillata]	0	GO:0003676;GO:0003824;GO:0005739;GO:0015074;GO:0051536	nucleic acid binding;catalytic activity;mitochondrion;DNA integration;iron-sulfur cluster binding
adi2mcaRNA13315_R1	adi2mcaRNA13315_R1	0	4.67614	PFX18326.1	46.9	3.2e-208	735.3	>PFX18326.1 Nucleotide-binding oligomerization domain-containing protein 2 [Stylophora pistillata]	K22614	0	0
adi2mcaRNA13318_R2	adi2mcaRNA13318_R2	0	0	XP_015759328.1	90.4	8.2e-135	489.6	>XP_015759328.1 PREDICTED: uncharacterized protein LOC107338603 [Acropora digitifera]	0	0	0
adi2mcaRNA13318_R3	adi2mcaRNA13318_R3	0	0	XP_015759328.1	64.8	5.5e-97	363.6	>XP_015759328.1 PREDICTED: uncharacterized protein LOC107338603 [Acropora digitifera]	0	0	0
adi2mcaRNA13318_R4	adi2mcaRNA13318_R4	0	0	XP_015759328.1	57.1	2.1e-75	292	>XP_015759328.1 PREDICTED: uncharacterized protein LOC107338603 [Acropora digitifera]	0	0	0
adi2mcaRNA13318_R7	adi2mcaRNA13318_R7	0	0	XP_015759328.1	47.9	6.3e-46	193.7	>XP_015759328.1 PREDICTED: uncharacterized protein LOC107338603 [Acropora digitifera]	0	0	0
adi2mcaRNA13319_R1	adi2mcaRNA13319_R1	0	0	XP_020897237.1	42.8	1e-52	216.9	>XP_020897237.1 uncharacterized protein LOC110236093, partial [Exaiptasia pallida]	0	0	0
adi2mcaRNA13319_R2	adi2mcaRNA13319_R2	0	0	XP_020897237.1	38.9	4.1e-46	194.9	>XP_020897237.1 uncharacterized protein LOC110236093, partial [Exaiptasia pallida]	0	0	0
adi2mcaRNA13319_R3	adi2mcaRNA13319_R3	0	0	XP_020897237.1	38.3	4.4e-45	191.4	>XP_020897237.1 uncharacterized protein LOC110236093, partial [Exaiptasia pallida]	0	0	0
adi2mcaRNA13319_R5	adi2mcaRNA13319_R5	0	0	XP_015759329.1	30.9	1.9e-17	99	>XP_015759329.1 PREDICTED: uncharacterized protein LOC107338605 [Acropora digitifera]	0	0	0
adi2mcaRNA13323_R8	adi2mcaRNA13323_R8	0	0	XP_015752474.1	80	3.1e-75	290.8	>XP_015752474.1 PREDICTED: uncharacterized protein LOC107332260 [Acropora digitifera]	0	0	0
adi2mcaRNA13338_R0	adi2mcaRNA13338_R0	9.03512	1.46239	XP_015759363.1	61.9	3.1e-134	488	>XP_015759363.1 PREDICTED: melanocyte-stimulating hormone receptor-like [Acropora digitifera]	0	0	0
adi2mcaRNA1334_R0	adi2mcaRNA1334_R0	0	0	XP_020617771.1	91.4	6.2e-133	483	>XP_020617771.1 uncharacterized protein LOC110055715 [Orbicella faveolata]	0	0	0
adi2mcaRNA13343_R0	adi2mcaRNA13343_R0	425.523	226.508	XP_015759367.1	95.9	3.4e-79	303.9	>XP_015759367.1 PREDICTED: prohibitin-like [Acropora digitifera]	0	GO:0005743;GO:0016021	mitochondrial inner membrane;integral component of membrane
adi2mcaRNA13346_R0	adi2mcaRNA13346_R0	0	0	XP_015759371.1	93.4	8.4e-94	352.8	>XP_015759371.1 PREDICTED: uncharacterized protein LOC107338650 [Acropora digitifera]	0	0	0
adi2mcaRNA13346_R2	adi2mcaRNA13346_R2	0	0	XP_015759371.1	92.6	4e-79	303.9	>XP_015759371.1 PREDICTED: uncharacterized protein LOC107338650 [Acropora digitifera]	0	0	0
adi2mcaRNA13350_R4	adi2mcaRNA13350_R4	2.43147	0	XP_015754659.1	35.2	2.8e-47	198.7	>XP_015754659.1 PREDICTED: TNF receptor-associated factor 5-like [Acropora digitifera]	0	0	0
adi2mcaRNA13350_R5	adi2mcaRNA13350_R5	0	0	XP_015759391.1	60.6	8.8e-42	179.9	>XP_015759391.1 PREDICTED: TNF receptor-associated factor 5-like [Acropora digitifera]	0	0	0
adi2mcaRNA13364_R6	adi2mcaRNA13364_R6	0	0	XP_015759375.1	70.1	5.3e-112	413.7	>XP_015759375.1 PREDICTED: uncharacterized protein K02A2.6-like [Acropora digitifera]	K07497	0	0
adi2mcaRNA13376_R2	adi2mcaRNA13376_R2	0	0	XP_015759406.1	97.5	4.3e-105	390.2	>XP_015759406.1 PREDICTED: uncharacterized protein LOC107338688 [Acropora digitifera]	0	GO:0003676;GO:0016020	nucleic acid binding;membrane
adi2mcaRNA13380_R0	adi2mcaRNA13380_R0	0	0	XP_015759382.1	77.3	8.8e-54	219.5	>XP_015759382.1 PREDICTED: uncharacterized protein LOC107338661 [Acropora digitifera]	0	0	0
adi2mcaRNA13380_R1	adi2mcaRNA13380_R1	0	0	XP_020604770.1	77	7.5e-60	240	>XP_020604770.1 uncharacterized protein LOC110043635, partial [Orbicella faveolata]	0	0	0
adi2mcaRNA13380_R3	adi2mcaRNA13380_R3	0	0	XP_020604770.1	77.7	4.4e-60	240.7	>XP_020604770.1 uncharacterized protein LOC110043635, partial [Orbicella faveolata]	0	0	0
adi2mcaRNA13380_R4	adi2mcaRNA13380_R4	0	0	XP_020604770.1	77.7	4.4e-60	240.7	>XP_020604770.1 uncharacterized protein LOC110043635, partial [Orbicella faveolata]	0	0	0
adi2mcaRNA13380_R7	adi2mcaRNA13380_R7	0	0	XP_020604770.1	77.7	4.4e-60	240.7	>XP_020604770.1 uncharacterized protein LOC110043635, partial [Orbicella faveolata]	0	0	0
adi2mcaRNA13380_R9	adi2mcaRNA13380_R9	0	0	XP_020604770.1	77	3.7e-59	237.7	>XP_020604770.1 uncharacterized protein LOC110043635, partial [Orbicella faveolata]	0	0	0
adi2mcaRNA13381_R1	adi2mcaRNA13381_R1	0	0	XP_015759407.1	45.6	1.1e-27	132.5	>XP_015759407.1 PREDICTED: uncharacterized protein LOC107338689 [Acropora digitifera]	0	0	0
adi2mcaRNA13382_R2	adi2mcaRNA13382_R2	0	0	XP_015759383.1	93.3	2.9e-164	587.8	>XP_015759383.1 PREDICTED: uncharacterized protein K02A2.6-like [Acropora digitifera]	K07497	GO:0003676;GO:0015074;GO:0016020	nucleic acid binding;DNA integration;membrane
adi2mcaRNA13382_R3	adi2mcaRNA13382_R3	0	0	XP_015759383.1	93.6	6.8e-167	596.7	>XP_015759383.1 PREDICTED: uncharacterized protein K02A2.6-like [Acropora digitifera]	K07497	GO:0003676;GO:0015074	nucleic acid binding;DNA integration
adi2mcaRNA13382_R8	adi2mcaRNA13382_R8	0	0	XP_015759383.1	79.6	1.5e-135	492.3	>XP_015759383.1 PREDICTED: uncharacterized protein K02A2.6-like [Acropora digitifera]	K07497	GO:0005488;GO:0006807;GO:0043170;GO:0044238	binding;nitrogen compound metabolic process;macromolecule metabolic process;primary metabolic process
adi2mcaRNA13404_R7	adi2mcaRNA13404_R7	0	0	PFX23717.1	66.9	6.7e-116	427.2	>PFX23717.1 hypothetical protein AWC38_SpisGene11735 [Stylophora pistillata]	0	GO:0005488	binding
adi2mcaRNA13404_R9	adi2mcaRNA13404_R9	0	0	PFX23717.1	68.8	6e-117	430.6	>PFX23717.1 hypothetical protein AWC38_SpisGene11735 [Stylophora pistillata]	0	GO:0003676;GO:0008270	nucleic acid binding;zinc ion binding
adi2mcaRNA13405_R1	adi2mcaRNA13405_R1	0	0	XP_015759414.1	69.2	5.9e-118	433.7	>XP_015759414.1 PREDICTED: uncharacterized protein LOC107338697 [Acropora digitifera]	0	0	0
adi2mcaRNA13405_R4	adi2mcaRNA13405_R4	0	0	XP_015759414.1	56.9	3.1e-102	381.3	>XP_015759414.1 PREDICTED: uncharacterized protein LOC107338697 [Acropora digitifera]	0	GO:0005488	binding
adi2mcaRNA13405_R8	adi2mcaRNA13405_R8	0	0	KXJ22701.1	57.1	1.7e-163	585.5	>KXJ22701.1 Pro-Pol polyprotein [Exaiptasia pallida]	0	0	0
adi2mcaRNA13406_R1	adi2mcaRNA13406_R1	0	0	KXJ22701.1	65.5	2.2e-150	541.6	>KXJ22701.1 Pro-Pol polyprotein [Exaiptasia pallida]	0	0	0
adi2mcaRNA13406_R8	adi2mcaRNA13406_R8	0	0	KXJ22701.1	62.7	2e-140	508.4	>KXJ22701.1 Pro-Pol polyprotein [Exaiptasia pallida]	0	0	0
adi2mcaRNA13408_R6	adi2mcaRNA13408_R6	0	12.3196	XP_015779403.1	54.4	2e-72	282.3	>XP_015779403.1 PREDICTED: lysophosphatidic acid receptor 1-A-like [Acropora digitifera]	0	0	0
adi2mcaRNA13417_R3	adi2mcaRNA13417_R3	0	0	XP_015759422.1	83.4	2.4e-157	564.7	>XP_015759422.1 PREDICTED: uncharacterized protein LOC107338704 [Acropora digitifera]	0	0	0
adi2mcaRNA13417_R5	adi2mcaRNA13417_R5	0	0	XP_015759422.1	82.8	1.3e-157	565.5	>XP_015759422.1 PREDICTED: uncharacterized protein LOC107338704 [Acropora digitifera]	0	0	0
adi2mcaRNA13417_R6	adi2mcaRNA13417_R6	0	0	XP_015759422.1	82.3	1.1e-156	562.4	>XP_015759422.1 PREDICTED: uncharacterized protein LOC107338704 [Acropora digitifera]	0	0	0
adi2mcaRNA13417_R8	adi2mcaRNA13417_R8	0	0	XP_015759422.1	87.8	2.1e-170	608.6	>XP_015759422.1 PREDICTED: uncharacterized protein LOC107338704 [Acropora digitifera]	0	0	0
adi2mcaRNA13417_R9	adi2mcaRNA13417_R9	0	0	XP_015759422.1	80.3	1.5e-148	535.4	>XP_015759422.1 PREDICTED: uncharacterized protein LOC107338704 [Acropora digitifera]	0	0	0
adi2mcaRNA13418_R0	adi2mcaRNA13418_R0	650.655	754.811	XP_015759442.1	61.4	5.4e-296	1026.5	>XP_015759442.1 PREDICTED: uncharacterized protein LOC107338726 [Acropora digitifera]	0	GO:0016070	RNA metabolic process
adi2mcaRNA13419_R0	adi2mcaRNA13419_R0	19.5958	21.924	XP_020600880.1	78.9	2.6e-197	697.6	>XP_020600880.1 serine/threonine-protein kinase ULK3-like [Orbicella faveolata]	K21358	GO:0004674;GO:0005524;GO:0006468;GO:0008589	protein serine/threonine kinase activity;ATP binding;protein phosphorylation;regulation of smoothened signaling pathway
adi2mcaRNA13422_R3	adi2mcaRNA13422_R3	0	0	XP_015779027.1	85	1.1e-164	589	>XP_015779027.1 PREDICTED: uncharacterized protein LOC107356911 [Acropora digitifera]	0	0	0
adi2mcaRNA13424_R6	adi2mcaRNA13424_R6	0	0	XP_015759425.1	90.2	6.1e-286	993	>XP_015759425.1 PREDICTED: uncharacterized protein LOC107338706 [Acropora digitifera]	0	0	0
adi2mcaRNA13429_R0	adi2mcaRNA13429_R0	60.5112	111.639	XP_015759451.1	48.4	7.2e-254	886.7	>XP_015759451.1 PREDICTED: treslin-like [Acropora digitifera]	0	0	0
adi2mcaRNA1343_R0	adi2mcaRNA1343_R0	5200.07	1584.46	#N/A	#N/A	#N/A	#N/A	#N/A	K13173	0	0
adi2mcaRNA13430_R0	adi2mcaRNA13430_R0	374.062	281.692	XP_015759452.1	48.9	2.5e-48	202.6	>XP_015759452.1 PREDICTED: uncharacterized protein LOC107338733 [Acropora digitifera]	0	0	0
adi2mcaRNA13431_R3	adi2mcaRNA13431_R3	0	0	XP_015759426.1	62.2	1.2e-32	149.1	>XP_015759426.1 PREDICTED: uncharacterized protein LOC107338707 [Acropora digitifera]	0	0	0
adi2mcaRNA13434_R2	adi2mcaRNA13434_R2	0	0	XP_015759429.1	59	3.8e-119	437.6	>XP_015759429.1 PREDICTED: uncharacterized protein LOC107338710 [Acropora digitifera]	0	0	0
adi2mcaRNA13434_R3	adi2mcaRNA13434_R3	0	0	XP_015759429.1	58.7	5.5e-118	433.7	>XP_015759429.1 PREDICTED: uncharacterized protein LOC107338710 [Acropora digitifera]	0	0	0
adi2mcaRNA13434_R4	adi2mcaRNA13434_R4	0	0	XP_015759429.1	60.9	4.2e-118	434.1	>XP_015759429.1 PREDICTED: uncharacterized protein LOC107338710 [Acropora digitifera]	0	0	0
adi2mcaRNA13434_R7	adi2mcaRNA13434_R7	0	0	XP_015759429.1	56.6	1.3e-114	422.5	>XP_015759429.1 PREDICTED: uncharacterized protein LOC107338710 [Acropora digitifera]	0	0	0
adi2mcaRNA13434_R8	adi2mcaRNA13434_R8	15.6637	0	XP_015759429.1	58.4	1.7e-104	388.7	>XP_015759429.1 PREDICTED: uncharacterized protein LOC107338710 [Acropora digitifera]	0	0	0
adi2mcaRNA13434_R9	adi2mcaRNA13434_R9	0	0	XP_015759429.1	53.1	7.7e-98	366.7	>XP_015759429.1 PREDICTED: uncharacterized protein LOC107338710 [Acropora digitifera]	0	0	0
adi2mcaRNA13435_R1	adi2mcaRNA13435_R1	0	0	XP_015759453.1	75.1	1.4e-141	512.7	>XP_015759453.1 PREDICTED: uncharacterized protein LOC107338735 [Acropora digitifera]	0	0	0
adi2mcaRNA13435_R3	adi2mcaRNA13435_R3	0	0	XP_015759453.1	83.3	6e-137	496.5	>XP_015759453.1 PREDICTED: uncharacterized protein LOC107338735 [Acropora digitifera]	0	0	0
adi2mcaRNA13435_R4	adi2mcaRNA13435_R4	0	5.85701	KXJ08302.1	48.1	3.7e-129	471.9	>KXJ08302.1 putative RNA-directed DNA polymerase from transposon X-element [Exaiptasia pallida]	0	GO:0016740	transferase activity
adi2mcaRNA13435_R6	adi2mcaRNA13435_R6	0	0	KXJ08302.1	68.2	8.6e-101	376.7	>KXJ08302.1 putative RNA-directed DNA polymerase from transposon X-element [Exaiptasia pallida]	0	0	0
adi2mcaRNA13435_R8	adi2mcaRNA13435_R8	0	0	XP_015759453.1	91.3	2.7e-57	231.9	>XP_015759453.1 PREDICTED: uncharacterized protein LOC107338735 [Acropora digitifera]	0	0	0
adi2mcaRNA13436_R0	adi2mcaRNA13436_R0	0	0	XP_015759455.1	91.3	5.7e-154	553.1	>XP_015759455.1 PREDICTED: uncharacterized protein LOC107338736 [Acropora digitifera]	0	0	0
adi2mcaRNA13436_R2	adi2mcaRNA13436_R2	41.3395	71.0188	XP_015759455.1	94.6	1.4e-146	528.5	>XP_015759455.1 PREDICTED: uncharacterized protein LOC107338736 [Acropora digitifera]	0	0	0
adi2mcaRNA13436_R4	adi2mcaRNA13436_R4	0	0	XP_015759455.1	80.5	1.5e-127	465.3	>XP_015759455.1 PREDICTED: uncharacterized protein LOC107338736 [Acropora digitifera]	0	0	0
adi2mcaRNA13436_R5	adi2mcaRNA13436_R5	0	0	XP_015759455.1	76.7	3.7e-120	440.7	>XP_015759455.1 PREDICTED: uncharacterized protein LOC107338736 [Acropora digitifera]	0	0	0
adi2mcaRNA13455_R0	adi2mcaRNA13455_R0	4.83422	6.36015	XP_020611552.1	65.5	5.8e-112	413.7	>XP_020611552.1 short-chain dehydrogenase/reductase family 9C member 7-like isoform X2 [Orbicella faveolata]	0	0	0
adi2mcaRNA13461_R6	adi2mcaRNA13461_R6	0	0	XP_020611849.1	73.8	2.9e-25	124.4	>XP_020611849.1 short-chain dehydrogenase/reductase family 9C member 7-like [Orbicella faveolata]	0	GO:0016021;GO:0016491;GO:0055114	integral component of membrane;oxidoreductase activity;oxidation-reduction process
adi2mcaRNA13461_R9	adi2mcaRNA13461_R9	0	0	XP_015758219.1	74.7	2.7e-25	124.4	>XP_015758219.1 PREDICTED: retinol dehydrogenase 7-like [Acropora digitifera]	0	0	0
adi2mcaRNA13466_R0	adi2mcaRNA13466_R0	326.022	654.717	XP_015759462.1	79.2	0	3248.4	>XP_015759462.1 PREDICTED: myoferlin-like [Acropora digitifera]	0	0	0
adi2mcaRNA13473_R1	adi2mcaRNA13473_R1	0	0	XP_015759470.1	73.5	1.5e-197	698.7	>XP_015759470.1 PREDICTED: RRP12-like protein [Acropora digitifera]	K14794	0	0
adi2mcaRNA13482_R1	adi2mcaRNA13482_R1	0.778553	0	XP_015759472.1	52	1.3e-298	1035.4	>XP_015759472.1 PREDICTED: uncharacterized protein LOC107338752 [Acropora digitifera]	0	0	0
adi2mcaRNA13482_R8	adi2mcaRNA13482_R8	0	0	XP_015759472.1	47.3	1e-251	879.4	>XP_015759472.1 PREDICTED: uncharacterized protein LOC107338752 [Acropora digitifera]	0	0	0
adi2mcaRNA13482_R9	adi2mcaRNA13482_R9	0	0	XP_015759472.1	47.1	2.7e-249	871.3	>XP_015759472.1 PREDICTED: uncharacterized protein LOC107338752 [Acropora digitifera]	0	0	0
adi2mcaRNA13507_R5	adi2mcaRNA13507_R5	0	0	XP_020610542.1	57.6	5e-86	327.4	>XP_020610542.1 somatostatin receptor type 1-like [Orbicella faveolata]	0	0	0
adi2mcaRNA13512_R0	adi2mcaRNA13512_R0	6.29606	1.45536	XP_015759531.1	73.2	0	1177.5	>XP_015759531.1 PREDICTED: uncharacterized protein LOC107338798 isoform X2 [Acropora digitifera]	0	GO:0004222;GO:0046872	metalloendopeptidase activity;metal ion binding
adi2mcaRNA13536_R8	adi2mcaRNA13536_R8	9.63944	2.82854	XP_015765102.1	40.1	3.6e-147	532.3	>XP_015765102.1 PREDICTED: uncharacterized protein LOC107344017 isoform X2 [Acropora digitifera]	0	0	0
adi2mcaRNA13546_R0	adi2mcaRNA13546_R0	13.7415	4.01833	XP_015759548.1	61.6	2.9e-49	204.9	>XP_015759548.1 PREDICTED: chromosome transmission fidelity protein 18 homolog [Acropora digitifera]	0	0	0
adi2mcaRNA13549_R0	adi2mcaRNA13549_R0	33.1774	99.5807	XP_015759578.1	44.9	1.1e-112	417.2	>XP_015759578.1 PREDICTED: uncharacterized protein LOC107338839 isoform X2 [Acropora digitifera]	0	0	0
adi2mcaRNA13549_R1	adi2mcaRNA13549_R1	82.8792	46.3531	XP_015759576.1	41.9	2.5e-108	402.9	>XP_015759576.1 PREDICTED: uncharacterized protein LOC107338839 isoform X1 [Acropora digitifera]	0	0	0
adi2mcaRNA13569_R8	adi2mcaRNA13569_R8	0	0	XP_015759553.1	92.3	1.8e-149	539.3	>XP_015759553.1 PREDICTED: zinc finger protein 862-like [Acropora digitifera]	0	0	0
adi2mcaRNA13570_R0	adi2mcaRNA13570_R0	0	0	XP_015759554.1	95.8	1.8e-236	827.8	>XP_015759554.1 PREDICTED: ATP-dependent DNA helicase RecQ-like [Acropora digitifera]	0	0	0
adi2mcaRNA13572_R0	adi2mcaRNA13572_R0	0	0	XP_015759557.1	90.9	2.6e-143	517.7	>XP_015759557.1 PREDICTED: uncharacterized protein LOC107338820 [Acropora digitifera]	0	GO:0003964;GO:0006278	RNA-directed DNA polymerase activity;RNA-dependent DNA biosynthetic process
adi2mcaRNA13572_R2	adi2mcaRNA13572_R2	0	0	PFX12032.1	76.5	7.1e-102	380.2	>PFX12032.1 hypothetical protein AWC38_SpisGene24067 [Stylophora pistillata]	0	GO:0003964;GO:0006278	RNA-directed DNA polymerase activity;RNA-dependent DNA biosynthetic process
adi2mcaRNA13572_R3	adi2mcaRNA13572_R3	0	0	XP_022777507.1	73.6	2.1e-108	401.7	>XP_022777507.1 uncharacterized protein LOC111318922 [Stylophora pistillata]	0	0	0
adi2mcaRNA13572_R4	adi2mcaRNA13572_R4	0	0	PFX12032.1	74	8.5e-110	406.4	>PFX12032.1 hypothetical protein AWC38_SpisGene24067 [Stylophora pistillata]	0	0	0
adi2mcaRNA13572_R6	adi2mcaRNA13572_R6	0	0	XP_015759557.1	61.6	4.2e-96	360.9	>XP_015759557.1 PREDICTED: uncharacterized protein LOC107338820 [Acropora digitifera]	0	GO:0003964;GO:0006278	RNA-directed DNA polymerase activity;RNA-dependent DNA biosynthetic process
adi2mcaRNA13572_R7	adi2mcaRNA13572_R7	0	0	XP_015759557.1	61.6	3.2e-96	361.3	>XP_015759557.1 PREDICTED: uncharacterized protein LOC107338820 [Acropora digitifera]	0	GO:0003964;GO:0006278	RNA-directed DNA polymerase activity;RNA-dependent DNA biosynthetic process
adi2mcaRNA13572_R8	adi2mcaRNA13572_R8	0	0	XP_022777507.1	76.4	3.6e-101	377.9	>XP_022777507.1 uncharacterized protein LOC111318922 [Stylophora pistillata]	0	GO:0003964;GO:0006278	RNA-directed DNA polymerase activity;RNA-dependent DNA biosynthetic process
adi2mcaRNA13572_R9	adi2mcaRNA13572_R9	0	0	PFX12032.1	76.1	1.9e-97	365.5	>PFX12032.1 hypothetical protein AWC38_SpisGene24067 [Stylophora pistillata]	0	GO:0003964;GO:0006278	RNA-directed DNA polymerase activity;RNA-dependent DNA biosynthetic process
adi2mcaRNA13576_R6	adi2mcaRNA13576_R6	22.5981	0	XP_015759593.1	75.9	3.4e-75	290.8	>XP_015759593.1 PREDICTED: uncharacterized protein LOC107338853 [Acropora digitifera]	0	GO:0003676;GO:0005634;GO:0008270	nucleic acid binding;nucleus;zinc ion binding
adi2mcaRNA13578_R0	adi2mcaRNA13578_R0	48.4218	31.181	XP_015759560.1	83	4.3e-131	476.9	>XP_015759560.1 PREDICTED: pyruvate dehydrogenase (acetyl-transferring) kinase isozyme 2, mitochondrial-like [Acropora digitifera]	0	GO:0000166;GO:0004674;GO:0005739;GO:0016310;GO:0042593;GO:1904183	nucleotide binding;protein serine/threonine kinase activity;mitochondrion;phosphorylation;glucose homeostasis;negative regulation of pyruvate dehydrogenase activity
adi2mcaRNA13580_R0	adi2mcaRNA13580_R0	810.903	569.975	XP_015759594.1	86.4	0	1158.7	>XP_015759594.1 PREDICTED: acyl-coenzyme A oxidase, peroxisomal-like [Acropora digitifera]	K00232	GO:0003997;GO:0005504;GO:0005777;GO:0033540;GO:0055088;GO:0071949	acyl-CoA oxidase activity;fatty acid binding;peroxisome;fatty acid beta-oxidation using acyl-CoA oxidase;lipid homeostasis;FAD binding
adi2mcaRNA13587_R1	adi2mcaRNA13587_R1	0	0	PFX25264.1	96.4	8.9e-24	119.8	>PFX25264.1 Leucine-rich repeat and calponin-likey domain-containing protein 1 [Stylophora pistillata]	0	GO:0000398;GO:0004842;GO:0005524;GO:0008270;GO:0008559;GO:0016021;GO:0016567;GO:0016887;GO:0019706;GO:0042908;GO:0055085	mRNA splicing, via spliceosome;ubiquitin-protein transferase activity;ATP binding;zinc ion binding;ATPase-coupled xenobiotic transmembrane transporter activity;integral component of membrane;protein ubiquitination;ATPase activity;protein-cysteine S-palmitoyltransferase activity;xenobiotic transport;transmembrane transport
adi2mcaRNA13587_R4	adi2mcaRNA13587_R4	0	0	PFX25264.1	90.6	3.6e-20	107.8	>PFX25264.1 Leucine-rich repeat and calponin-likey domain-containing protein 1 [Stylophora pistillata]	0	GO:0000398;GO:0000724;GO:0000781;GO:0003697;GO:0004842;GO:0005524;GO:0005662;GO:0006260;GO:0006289;GO:0008270;GO:0008559;GO:0016021;GO:0016567;GO:0016887;GO:0019706;GO:0035861;GO:0042908;GO:0055085	mRNA splicing, via spliceosome;double-strand break repair via homologous recombination;chromosome, telomeric region;single-stranded DNA binding;ubiquitin-protein transferase activity;ATP binding;DNA replication factor A complex;DNA replication;nucleotide-excision repair;zinc ion binding;ATPase-coupled xenobiotic transmembrane transporter activity;integral component of membrane;protein ubiquitinat…
adi2mcaRNA13587_R6	adi2mcaRNA13587_R6	0	0	PFX27531.1	90.9	4.4e-21	110.5	>PFX27531.1 Protein sidekick-2 [Stylophora pistillata]	0	GO:0000398;GO:0004842;GO:0005524;GO:0008270;GO:0008559;GO:0016021;GO:0016567;GO:0016887;GO:0019706;GO:0042908;GO:0055085	mRNA splicing, via spliceosome;ubiquitin-protein transferase activity;ATP binding;zinc ion binding;ATPase-coupled xenobiotic transmembrane transporter activity;integral component of membrane;protein ubiquitination;ATPase activity;protein-cysteine S-palmitoyltransferase activity;xenobiotic transport;transmembrane transport
adi2mcaRNA13588_R0	adi2mcaRNA13588_R0	2.73587	14.0908	XP_015759598.1	71.7	0	1179.1	>XP_015759598.1 PREDICTED: glutamate receptor ionotropic, kainate 2-like [Acropora digitifera]	0	GO:0016020	membrane
adi2mcaRNA13589_R0	adi2mcaRNA13589_R0	4.73229	16.6742	XP_015759599.1	90.3	0	1567.4	>XP_015759599.1 PREDICTED: diacylglycerol kinase beta-like [Acropora digitifera]	K00901	GO:0007165;GO:0016301;GO:0016310;GO:0016773;GO:0046486	signal transduction;kinase activity;phosphorylation;phosphotransferase activity, alcohol group as acceptor;glycerolipid metabolic process
adi2mcaRNA13602_R0	adi2mcaRNA13602_R0	0	0	XP_015759602.1	38.6	1.1e-184	656.8	>XP_015759602.1 PREDICTED: uncharacterized protein LOC107338864 [Acropora digitifera]	0	GO:0044237	cellular metabolic process
adi2mcaRNA13602_R3	adi2mcaRNA13602_R3	0	0	XP_015759602.1	38.7	7.5e-186	660.6	>XP_015759602.1 PREDICTED: uncharacterized protein LOC107338864 [Acropora digitifera]	0	GO:0044237	cellular metabolic process
adi2mcaRNA13602_R4	adi2mcaRNA13602_R4	0	0	XP_015759602.1	38.5	8.9e-187	663.7	>XP_015759602.1 PREDICTED: uncharacterized protein LOC107338864 [Acropora digitifera]	0	0	0
adi2mcaRNA13602_R7	adi2mcaRNA13602_R7	0	0.612086	XP_015759602.1	41.5	4.4e-193	684.5	>XP_015759602.1 PREDICTED: uncharacterized protein LOC107338864 [Acropora digitifera]	0	0	0
adi2mcaRNA13602_R8	adi2mcaRNA13602_R8	0	0	XP_015759602.1	38.4	1.9e-181	646	>XP_015759602.1 PREDICTED: uncharacterized protein LOC107338864 [Acropora digitifera]	0	GO:0044237	cellular metabolic process
adi2mcaRNA13621_R0	adi2mcaRNA13621_R0	0	0	#N/A	#N/A	#N/A	#N/A	#N/A	0	0	0
adi2mcaRNA13628_R8	adi2mcaRNA13628_R8	1.08065	0.436817	PFX26880.1	56.8	2.8e-15	93.6	>PFX26880.1 Delta-like protein 1 [Stylophora pistillata]	0	0	0
adi2mcaRNA13659_R9	adi2mcaRNA13659_R9	0	8.64897	XP_022796912.1	46	6.5e-31	144.1	>XP_022796912.1 retinoschisin-like [Stylophora pistillata]	0	0	0
adi2mcaRNA13665_R0	adi2mcaRNA13665_R0	509.255	985.734	XP_015759664.1	73.6	0	2509.9	>XP_015759664.1 PREDICTED: receptor-type tyrosine-protein phosphatase delta-like [Acropora digitifera]	0	GO:0004721;GO:0006470	phosphoprotein phosphatase activity;protein dephosphorylation
adi2mcaRNA13672_R2	adi2mcaRNA13672_R2	0	0	XP_015759666.1	56.5	3.7e-53	218.4	>XP_015759666.1 PREDICTED: uncharacterized protein LOC107338929 [Acropora digitifera]	0	0	0
adi2mcaRNA13672_R3	adi2mcaRNA13672_R3	2.49384	0	XP_015759666.1	46.7	1.7e-44	189.5	>XP_015759666.1 PREDICTED: uncharacterized protein LOC107338929 [Acropora digitifera]	0	0	0
adi2mcaRNA13683_R2	adi2mcaRNA13683_R2	0	0	XP_015759669.1	51.2	5e-112	414.5	>XP_015759669.1 PREDICTED: eukaryotic translation initiation factor 2D-like [Acropora digitifera]	K15027	0	0
adi2mcaRNA13692_R0	adi2mcaRNA13692_R0	2.46697	3.43966	XP_015759673.1	73	8.6e-205	723	>XP_015759673.1 PREDICTED: ATP-binding cassette sub-family D member 3-like [Acropora digitifera]	0	GO:0005324;GO:0005524;GO:0005777;GO:0009062;GO:0015910;GO:0016021;GO:0016887;GO:0042626;GO:0042803	long-chain fatty acid transporter activity;ATP binding;peroxisome;fatty acid catabolic process;long-chain fatty acid import into peroxisome;integral component of membrane;ATPase activity;ATPase-coupled transmembrane transporter activity;protein homodimerization activity
adi2mcaRNA13695_R0	adi2mcaRNA13695_R0	0	1.4415	XP_015759674.1	79.9	2.3e-185	657.9	>XP_015759674.1 PREDICTED: 5'-AMP-activated protein kinase catalytic subunit alpha-2-like [Acropora digitifera]	0	0	0
adi2mcaRNA13695_R1	adi2mcaRNA13695_R1	0	0	XP_015759674.1	78.3	4.5e-181	643.7	>XP_015759674.1 PREDICTED: 5'-AMP-activated protein kinase catalytic subunit alpha-2-like [Acropora digitifera]	0	0	0
adi2mcaRNA13696_R1	adi2mcaRNA13696_R1	0	0	XP_015759697.1	74.3	3.3e-47	197.6	>XP_015759697.1 PREDICTED: coiled-coil domain-containing protein 152-like [Acropora digitifera]	0	GO:0016740	transferase activity
adi2mcaRNA13718_R1	adi2mcaRNA13718_R1	0	0	XP_015759701.1	67.7	0	1199.9	>XP_015759701.1 PREDICTED: rho GTPase-activating protein 100F-like [Acropora digitifera]	K20655	GO:0005737;GO:0007165;GO:0043087	cytoplasm;signal transduction;regulation of GTPase activity
adi2mcaRNA13718_R2	adi2mcaRNA13718_R2	0	0	XP_015759701.1	58.3	8.5e-278	966.1	>XP_015759701.1 PREDICTED: rho GTPase-activating protein 100F-like [Acropora digitifera]	0	0	0
adi2mcaRNA13719_R1	adi2mcaRNA13719_R1	0	0	XP_015759677.1	65.7	9.9e-73	282.7	>XP_015759677.1 PREDICTED: BTB/POZ domain-containing protein 19-like [Acropora digitifera]	0	0	0
adi2mcaRNA13726_R3	adi2mcaRNA13726_R3	0	0	XP_020605004.1	74.2	3.3e-131	477.6	>XP_020605004.1 pyroglutamylated RFamide peptide receptor-like [Orbicella faveolata]	0	0	0
adi2mcaRNA13726_R5	adi2mcaRNA13726_R5	0	0	XP_020605004.1	76.6	2e-122	448.4	>XP_020605004.1 pyroglutamylated RFamide peptide receptor-like [Orbicella faveolata]	0	0	0
adi2mcaRNA13729_R0	adi2mcaRNA13729_R0	0	0	XP_020605004.1	79.7	3.9e-151	543.9	>XP_020605004.1 pyroglutamylated RFamide peptide receptor-like [Orbicella faveolata]	0	0	0
adi2mcaRNA13729_R1	adi2mcaRNA13729_R1	0	0	XP_020605004.1	79.1	1.2e-149	538.9	>XP_020605004.1 pyroglutamylated RFamide peptide receptor-like [Orbicella faveolata]	0	0	0
adi2mcaRNA13729_R2	adi2mcaRNA13729_R2	0	0	XP_020605004.1	79.4	1e-151	545.8	>XP_020605004.1 pyroglutamylated RFamide peptide receptor-like [Orbicella faveolata]	0	0	0
adi2mcaRNA13729_R4	adi2mcaRNA13729_R4	0	0	XP_020605004.1	68.3	7.1e-126	459.9	>XP_020605004.1 pyroglutamylated RFamide peptide receptor-like [Orbicella faveolata]	0	0	0
adi2mcaRNA13729_R5	adi2mcaRNA13729_R5	0	0	XP_020605004.1	78.6	6.6e-131	476.5	>XP_020605004.1 pyroglutamylated RFamide peptide receptor-like [Orbicella faveolata]	0	0	0
adi2mcaRNA1373_R0	adi2mcaRNA1373_R0	2.70556	5.67109	XP_015758781.1	58.6	0	2031.5	>XP_015758781.1 PREDICTED: uncharacterized protein LOC107338042 [Acropora digitifera]	K16288	GO:0097159;GO:1901363	organic cyclic compound binding;heterocyclic compound binding
adi2mcaRNA13733_R5	adi2mcaRNA13733_R5	0	0	XP_020605004.1	86.5	4e-59	236.9	>XP_020605004.1 pyroglutamylated RFamide peptide receptor-like [Orbicella faveolata]	0	0	0
adi2mcaRNA13742_R0	adi2mcaRNA13742_R0	64.2827	143.005	XP_015759748.1	69.4	0	1844.3	>XP_015759748.1 PREDICTED: neogenin-like [Acropora digitifera]	0	0	0
adi2mcaRNA13751_R0	adi2mcaRNA13751_R0	2820.05	1925.49	XP_015759756.1	72.5	2e-35	157.9	>XP_015759756.1 PREDICTED: transcription initiation factor IIA subunit 2-like [Acropora digitifera]	K03123	GO:0003713;GO:0003743;GO:0005672;GO:0006413;GO:0017025;GO:0045944;GO:0046983;GO:0051091;GO:0051123	transcription coactivator activity;translation initiation factor activity;transcription factor TFIIA complex;translational initiation;TBP-class protein binding;positive regulation of transcription by RNA polymerase II;protein dimerization activity;positive regulation of DNA-binding transcription factor activity;RNA polymerase II preinitiation complex assembly
adi2mcaRNA13751_R1	adi2mcaRNA13751_R1	1240.23	948.418	XP_020615480.1	80.9	2.2e-12	81.3	>XP_020615480.1 transcription initiation factor IIA subunit 2-like [Orbicella faveolata]	K03123	GO:0003713;GO:0003743;GO:0005672;GO:0006413;GO:0017025;GO:0045944;GO:0051091;GO:0051123	transcription coactivator activity;translation initiation factor activity;transcription factor TFIIA complex;translational initiation;TBP-class protein binding;positive regulation of transcription by RNA polymerase II;positive regulation of DNA-binding transcription factor activity;RNA polymerase II preinitiation complex assembly
adi2mcaRNA13775_R4	adi2mcaRNA13775_R4	0	0	PFX17136.1	64.4	3.9e-60	240.7	>PFX17136.1 Protein asteroid-like 1 [Stylophora pistillata]	0	0	0
adi2mcaRNA13777_R2	adi2mcaRNA13777_R2	0	0	XP_020624675.1	51.4	2.9e-68	268.5	>XP_020624675.1 LOW QUALITY PROTEIN: uncharacterized protein LOC110062155 [Orbicella faveolata]	0	0	0
adi2mcaRNA13777_R3	adi2mcaRNA13777_R3	0	0	XP_020624675.1	49.1	7.1e-63	250.4	>XP_020624675.1 LOW QUALITY PROTEIN: uncharacterized protein LOC110062155 [Orbicella faveolata]	0	0	0
adi2mcaRNA13780_R2	adi2mcaRNA13780_R2	0	0	XP_015759771.1	60	2.8e-58	234.6	>XP_015759771.1 PREDICTED: ATP-dependent DNA helicase RecQ-like isoform X1 [Acropora digitifera]	0	0	0
adi2mcaRNA13780_R4	adi2mcaRNA13780_R4	0	0	XP_015759771.1	60.4	7.4e-53	216.5	>XP_015759771.1 PREDICTED: ATP-dependent DNA helicase RecQ-like isoform X1 [Acropora digitifera]	0	0	0
adi2mcaRNA13787_R4	adi2mcaRNA13787_R4	0	0	XP_015759735.1	52.9	1.5e-30	142.1	>XP_015759735.1 PREDICTED: uncharacterized protein LOC107339006 [Acropora digitifera]	0	GO:0008270	zinc ion binding
adi2mcaRNA13787_R5	adi2mcaRNA13787_R5	0	0	XP_015759735.1	53.5	5.4e-31	143.7	>XP_015759735.1 PREDICTED: uncharacterized protein LOC107339006 [Acropora digitifera]	0	GO:0008270	zinc ion binding
adi2mcaRNA13787_R6	adi2mcaRNA13787_R6	0	0	XP_015759735.1	53.5	1.2e-30	142.5	>XP_015759735.1 PREDICTED: uncharacterized protein LOC107339006 [Acropora digitifera]	0	0	0
adi2mcaRNA13788_R0	adi2mcaRNA13788_R0	0	0	XP_015759775.1	86.1	7.2e-116	426.4	>XP_015759775.1 PREDICTED: uncharacterized protein LOC107339047 [Acropora digitifera]	0	0	0
adi2mcaRNA13788_R1	adi2mcaRNA13788_R1	0	0	XP_015759775.1	87.8	9.4e-117	429.5	>XP_015759775.1 PREDICTED: uncharacterized protein LOC107339047 [Acropora digitifera]	0	0	0
adi2mcaRNA13788_R2	adi2mcaRNA13788_R2	0	0	XP_015759775.1	95.7	4.6e-122	446.8	>XP_015759775.1 PREDICTED: uncharacterized protein LOC107339047 [Acropora digitifera]	0	0	0
adi2mcaRNA13788_R4	adi2mcaRNA13788_R4	0	0	XP_015759775.1	95.7	4.6e-122	446.8	>XP_015759775.1 PREDICTED: uncharacterized protein LOC107339047 [Acropora digitifera]	0	0	0
adi2mcaRNA13788_R5	adi2mcaRNA13788_R5	0	0	XP_015759775.1	95.7	4.6e-122	446.8	>XP_015759775.1 PREDICTED: uncharacterized protein LOC107339047 [Acropora digitifera]	0	0	0
adi2mcaRNA13788_R6	adi2mcaRNA13788_R6	0	0	XP_015759775.1	95.7	4.6e-122	446.8	>XP_015759775.1 PREDICTED: uncharacterized protein LOC107339047 [Acropora digitifera]	0	0	0
adi2mcaRNA13788_R7	adi2mcaRNA13788_R7	0	0	XP_015759775.1	95.3	1.3e-121	445.3	>XP_015759775.1 PREDICTED: uncharacterized protein LOC107339047 [Acropora digitifera]	0	0	0
adi2mcaRNA13788_R8	adi2mcaRNA13788_R8	0	0	XP_015759775.1	95.3	1.3e-121	445.3	>XP_015759775.1 PREDICTED: uncharacterized protein LOC107339047 [Acropora digitifera]	0	0	0
adi2mcaRNA13788_R9	adi2mcaRNA13788_R9	0	0	XP_015759775.1	95.3	1.3e-121	445.3	>XP_015759775.1 PREDICTED: uncharacterized protein LOC107339047 [Acropora digitifera]	0	0	0
adi2mcaRNA13789_R2	adi2mcaRNA13789_R2	0	0	XP_015759736.1	77.9	3.2e-228	801.2	>XP_015759736.1 PREDICTED: uncharacterized protein LOC107339007 [Acropora digitifera]	0	0	0
adi2mcaRNA13789_R3	adi2mcaRNA13789_R3	0	0	XP_015759736.1	84.8	6e-230	807	>XP_015759736.1 PREDICTED: uncharacterized protein LOC107339007 [Acropora digitifera]	0	0	0
adi2mcaRNA13789_R5	adi2mcaRNA13789_R5	0	0	XP_015759736.1	54	9.6e-159	570.5	>XP_015759736.1 PREDICTED: uncharacterized protein LOC107339007 [Acropora digitifera]	0	GO:0006811	ion transport
adi2mcaRNA13789_R7	adi2mcaRNA13789_R7	0	0	XP_015759736.1	46.4	9.5e-157	563.9	>XP_015759736.1 PREDICTED: uncharacterized protein LOC107339007 [Acropora digitifera]	0	GO:0006810	transport
adi2mcaRNA13789_R8	adi2mcaRNA13789_R8	0	2.13863	XP_015759736.1	47	1.4e-155	560.1	>XP_015759736.1 PREDICTED: uncharacterized protein LOC107339007 [Acropora digitifera]	0	GO:0006810	transport
adi2mcaRNA13789_R9	adi2mcaRNA13789_R9	0	0	XP_015759736.1	49.5	1.8e-165	592.8	>XP_015759736.1 PREDICTED: uncharacterized protein LOC107339007 [Acropora digitifera]	0	GO:0006810	transport
adi2mcaRNA13791_R1	adi2mcaRNA13791_R1	112.923	12.4124	XP_015759778.1	74.1	6.3e-84	319.7	>XP_015759778.1 PREDICTED: proteasome subunit alpha type-6-like [Acropora digitifera]	K02730	GO:0004175;GO:0005634;GO:0005737;GO:0010499;GO:0019773;GO:0043161	endopeptidase activity;nucleus;cytoplasm;proteasomal ubiquitin-independent protein catabolic process;proteasome core complex, alpha-subunit complex;proteasome-mediated ubiquitin-dependent protein catabolic process
adi2mcaRNA1380_R0	adi2mcaRNA1380_R0	1030.32	1055.52	XP_015758816.1	60.3	0	1974.9	>XP_015758816.1 PREDICTED: A disintegrin and metalloproteinase with thrombospondin motifs 18-like [Acropora digitifera]	0	GO:0003824	catalytic activity
adi2mcaRNA13805_R1	adi2mcaRNA13805_R1	0	0	PFX13880.1	82.9	2.9e-125	458.4	>PFX13880.1 putative RNA-directed DNA polymerase from transposon X-element [Stylophora pistillata]	0	GO:0003964;GO:0006278	RNA-directed DNA polymerase activity;RNA-dependent DNA biosynthetic process
adi2mcaRNA13805_R2	adi2mcaRNA13805_R2	2.75328	0	XP_015759737.1	51.4	1.7e-64	255.8	>XP_015759737.1 PREDICTED: uncharacterized protein LOC107339008 [Acropora digitifera]	0	0	0
adi2mcaRNA13805_R4	adi2mcaRNA13805_R4	0	0	PFX21008.1	88.1	5.4e-71	278.1	>PFX21008.1 hypothetical protein AWC38_SpisGene14517 [Stylophora pistillata]	0	0	0
adi2mcaRNA13805_R9	adi2mcaRNA13805_R9	1.68575	0	PFX19180.1	78.4	1.2e-171	612.5	>PFX19180.1 putative RNA-directed DNA polymerase from transposon X-element [Stylophora pistillata]	0	GO:0003964;GO:0006278;GO:0008080	RNA-directed DNA polymerase activity;RNA-dependent DNA biosynthetic process;N-acetyltransferase activity
adi2mcaRNA13816_R0	adi2mcaRNA13816_R0	1.01803	0.284105	XP_015759787.1	81.4	0	1955.6	>XP_015759787.1 PREDICTED: mucin-5AC-like [Acropora digitifera]	0	0	0
adi2mcaRNA13821_R0	adi2mcaRNA13821_R0	0	0	#N/A	#N/A	#N/A	#N/A	#N/A	0	0	0
adi2mcaRNA13821_R3	adi2mcaRNA13821_R3	0	0	#N/A	#N/A	#N/A	#N/A	#N/A	0	0	0
adi2mcaRNA13827_R0	adi2mcaRNA13827_R0	0	4.79254	XP_015759795.1	64	4.1e-271	943.7	>XP_015759795.1 PREDICTED: probable glycoprotein hormone G-protein coupled receptor [Acropora digitifera]	0	GO:0005887;GO:0007189;GO:0007190;GO:0008528;GO:0009755;GO:0016500	integral component of plasma membrane;adenylate cyclase-activating G protein-coupled receptor signaling pathway;activation of adenylate cyclase activity;G protein-coupled peptide receptor activity;hormone-mediated signaling pathway;protein-hormone receptor activity
adi2mcaRNA13842_R0	adi2mcaRNA13842_R0	6131.06	4013.09	XP_015759826.1	87.1	3.4e-88	334	>XP_015759826.1 PREDICTED: peroxiredoxin-5, mitochondrial-like [Acropora digitifera]	K11187	GO:0005623;GO:0005739;GO:0005777;GO:0008379;GO:0034599;GO:0042744;GO:0045454;GO:0055114;GO:0098869	cell;mitochondrion;peroxisome;thioredoxin peroxidase activity;cellular response to oxidative stress;hydrogen peroxide catabolic process;cell redox homeostasis;oxidation-reduction process;cellular oxidant detoxification
adi2mcaRNA13854_R2	adi2mcaRNA13854_R2	0	0	XP_015763408.1	78	2e-47	198.7	>XP_015763408.1 PREDICTED: multidrug resistance-associated protein 4-like [Acropora digitifera]	0	GO:0016020;GO:0042626;GO:0055085	membrane;ATPase-coupled transmembrane transporter activity;transmembrane transport
adi2mcaRNA13855_R9	adi2mcaRNA13855_R9	0	0	XP_015759831.1	68.8	7.5e-166	593.2	>XP_015759831.1 PREDICTED: uncharacterized protein K02A2.6-like [Acropora digitifera]	K07497	0	0
adi2mcaRNA13860_R0	adi2mcaRNA13860_R0	240.507	89.5934	XP_015759804.1	69	9.4e-138	499.6	>XP_015759804.1 PREDICTED: uncharacterized protein LOC107339077 [Acropora digitifera]	0	GO:0005245;GO:0005891	voltage-gated calcium channel activity;voltage-gated calcium channel complex
adi2mcaRNA13866_R4	adi2mcaRNA13866_R4	0	0	XP_015759805.1	60.1	0	1231.5	>XP_015759805.1 PREDICTED: uncharacterized protein LOC107339078 [Acropora digitifera]	0	0	0
adi2mcaRNA13868_R0	adi2mcaRNA13868_R0	22.0687	13.3566	XP_015759806.1	56.5	2.6e-159	571.6	>XP_015759806.1 PREDICTED: lactase-phlorizin hydrolase-like [Acropora digitifera]	0	GO:0004553;GO:0008152	hydrolase activity, hydrolyzing O-glycosyl compounds;metabolic process
adi2mcaRNA13870_R2	adi2mcaRNA13870_R2	0	0	XP_015759844.1	50.7	9.3e-42	181	>XP_015759844.1 PREDICTED: coilin-like [Acropora digitifera]	K13150	0	0
adi2mcaRNA13880_R0	adi2mcaRNA13880_R0	46.5281	42.0751	XP_015759850.1	70	8.3e-152	546.2	>XP_015759850.1 PREDICTED: diphthine methyltransferase-like isoform X2 [Acropora digitifera]	K17868	0	0
adi2mcaRNA1389_R0	adi2mcaRNA1389_R0	597.23	935.41	XP_015759919.1	95.8	1.3e-112	415.2	>XP_015759919.1 PREDICTED: cAMP-dependent protein kinase catalytic subunit PRKX-like [Acropora digitifera]	0	GO:0004691;GO:0005524;GO:0005952;GO:0007165;GO:0018105	cAMP-dependent protein kinase activity;ATP binding;cAMP-dependent protein kinase complex;signal transduction;peptidyl-serine phosphorylation
adi2mcaRNA13897_R2	adi2mcaRNA13897_R2	0	0	XP_015759864.1	90.1	2.2e-214	755	>XP_015759864.1 PREDICTED: tigger transposable element-derived protein 4-like [Acropora digitifera]	0	0	0
adi2mcaRNA13897_R3	adi2mcaRNA13897_R3	0	0	XP_015759864.1	89.6	9.5e-215	756.1	>XP_015759864.1 PREDICTED: tigger transposable element-derived protein 4-like [Acropora digitifera]	0	GO:0005488	binding
adi2mcaRNA13897_R4	adi2mcaRNA13897_R4	0	0	XP_015759864.1	87.7	5.5e-198	700.3	>XP_015759864.1 PREDICTED: tigger transposable element-derived protein 4-like [Acropora digitifera]	0	0	0
adi2mcaRNA13897_R5	adi2mcaRNA13897_R5	0	0	XP_015759864.1	79	3.7e-179	637.9	>XP_015759864.1 PREDICTED: tigger transposable element-derived protein 4-like [Acropora digitifera]	0	0	0
adi2mcaRNA13897_R6	adi2mcaRNA13897_R6	0	0	XP_015759864.1	76.4	2.7e-171	611.3	>XP_015759864.1 PREDICTED: tigger transposable element-derived protein 4-like [Acropora digitifera]	0	0	0
adi2mcaRNA13897_R7	adi2mcaRNA13897_R7	0	0	XP_015759864.1	63	8.1e-129	470.3	>XP_015759864.1 PREDICTED: tigger transposable element-derived protein 4-like [Acropora digitifera]	0	0	0
adi2mcaRNA13897_R8	adi2mcaRNA13897_R8	0	0	XP_015759864.1	77.6	1.2e-141	513.1	>XP_015759864.1 PREDICTED: tigger transposable element-derived protein 4-like [Acropora digitifera]	0	GO:0005488	binding
adi2mcaRNA13897_R9	adi2mcaRNA13897_R9	0	0	XP_015759864.1	56.7	1e-130	476.9	>XP_015759864.1 PREDICTED: tigger transposable element-derived protein 4-like [Acropora digitifera]	0	0	0
adi2mcaRNA13906_R7	adi2mcaRNA13906_R7	782.576	635.369	XP_015754793.1	50	5e-66	260.8	>XP_015754793.1 PREDICTED: uncharacterized protein LOC107334380 [Acropora digitifera]	0	0	0
adi2mcaRNA13923_R6	adi2mcaRNA13923_R6	9.2437	2.9535	XP_015758082.1	66.7	4.1e-20	108.6	>XP_015758082.1 PREDICTED: branchpoint-bridging protein-like [Acropora digitifera]	0	GO:0003676	nucleic acid binding
adi2mcaRNA13962_R0	adi2mcaRNA13962_R0	0	0	XP_015759937.1	41	1.2e-20	109.4	>XP_015759937.1 PREDICTED: activin receptor type-2B-like isoform X2 [Acropora digitifera]	0	0	0
adi2mcaRNA13963_R0	adi2mcaRNA13963_R0	0	0	XP_015759937.1	40.7	4e-21	110.5	>XP_015759937.1 PREDICTED: activin receptor type-2B-like isoform X2 [Acropora digitifera]	0	0	0
adi2mcaRNA13977_R3	adi2mcaRNA13977_R3	0	0	XP_015759968.1	59.9	9.9e-79	303.1	>XP_015759968.1 PREDICTED: uncharacterized protein LOC107339221 isoform X2 [Acropora digitifera]	0	0	0
adi2mcaRNA13978_R0	adi2mcaRNA13978_R0	0	0	XP_015759967.1	85	5.3e-131	476.9	>XP_015759967.1 PREDICTED: uncharacterized protein LOC107339221 isoform X1 [Acropora digitifera]	0	0	0
adi2mcaRNA13978_R1	adi2mcaRNA13978_R1	0	0	XP_015759967.1	84.7	1e-129	472.6	>XP_015759967.1 PREDICTED: uncharacterized protein LOC107339221 isoform X1 [Acropora digitifera]	0	0	0
adi2mcaRNA13978_R2	adi2mcaRNA13978_R2	0	0	XP_015759967.1	73.8	2.5e-104	388.3	>XP_015759967.1 PREDICTED: uncharacterized protein LOC107339221 isoform X1 [Acropora digitifera]	0	0	0
adi2mcaRNA13980_R0	adi2mcaRNA13980_R0	0	0	XP_022784269.1	58	1.2e-124	456.1	>XP_022784269.1 uncharacterized protein LOC111324863 [Stylophora pistillata]	0	0	0
adi2mcaRNA13982_R2	adi2mcaRNA13982_R2	0.811529	0.625442	XP_015759970.1	59.3	0	1081.6	>XP_015759970.1 PREDICTED: uncharacterized protein LOC107339224 [Acropora digitifera]	0	0	0
adi2mcaRNA14013_R2	adi2mcaRNA14013_R2	0	6.11884	XP_020626806.1	45	3.2e-179	638.6	>XP_020626806.1 schlafen family member 13-like isoform X1 [Orbicella faveolata]	0	GO:0004672;GO:0006807;GO:0016310;GO:0044238;GO:0044260;GO:0097159;GO:1901363	protein kinase activity;nitrogen compound metabolic process;phosphorylation;primary metabolic process;cellular macromolecule metabolic process;organic cyclic compound binding;heterocyclic compound binding
adi2mcaRNA14013_R3	adi2mcaRNA14013_R3	13.3618	27.7641	XP_020626806.1	44.8	7.8e-173	617.5	>XP_020626806.1 schlafen family member 13-like isoform X1 [Orbicella faveolata]	0	GO:0016301;GO:0044237	kinase activity;cellular metabolic process
adi2mcaRNA14013_R4	adi2mcaRNA14013_R4	42.4856	26.2353	XP_020626809.1	41.2	1.7e-171	613.2	>XP_020626809.1 schlafen family member 13-like isoform X2 [Orbicella faveolata]	0	GO:0016301;GO:0044237	kinase activity;cellular metabolic process
adi2mcaRNA14013_R5	adi2mcaRNA14013_R5	34.6368	22.9512	XP_022781837.1	50.5	8.7e-164	587.4	>XP_022781837.1 LOW QUALITY PROTEIN: schlafen family member 13-like [Stylophora pistillata]	0	GO:0016301;GO:0044237	kinase activity;cellular metabolic process
adi2mcaRNA14014_R0	adi2mcaRNA14014_R0	631.006	435.765	XP_015759995.1	68.9	4.5e-179	637.1	>XP_015759995.1 PREDICTED: E3 ubiquitin-protein ligase parkin-like [Acropora digitifera]	K04556	GO:0005737;GO:0016740;GO:0043231;GO:0044267;GO:0050794	cytoplasm;transferase activity;intracellular membrane-bounded organelle;cellular protein metabolic process;regulation of cellular process
adi2mcaRNA14019_R0	adi2mcaRNA14019_R0	242.743	466.754	XP_015759994.1	85.9	2.7e-257	897.1	>XP_015759994.1 PREDICTED: tripartite motif-containing protein 67-like [Acropora digitifera]	0	GO:0046872	metal ion binding
adi2mcaRNA14029_R0	adi2mcaRNA14029_R0	18.0891	26.9535	XP_015759953.1	75.7	0	1774.2	>XP_015759953.1 PREDICTED: uncharacterized protein LOC107339207 [Acropora digitifera]	K20641	GO:0098772	molecular function regulator
adi2mcaRNA14031_R0	adi2mcaRNA14031_R0	314.305	363.567	XP_015760001.1	63.4	4.8e-153	550.8	>XP_015760001.1 PREDICTED: uncharacterized protein LOC107339252 isoform X1 [Acropora digitifera]	0	0	0
adi2mcaRNA14033_R0	adi2mcaRNA14033_R0	576.493	1014.47	XP_013416553.1	68.1	5.4e-107	397.9	>XP_013416553.1 radixin isoform X1 [Lingula anatina]	0	GO:0000122;GO:0001650;GO:0001726;GO:0001772;GO:0001931;GO:0001951;GO:0002009;GO:0002119;GO:0003376;GO:0005198;GO:0005623;GO:0005768;GO:0005829;GO:0005884;GO:0005902;GO:0005903;GO:0005925;GO:0007159;GO:0008017;GO:0008022;GO:0008093;GO:0008360;GO:0010628;GO:0010737;GO:0019898;GO:0022614;GO:0030033;GO:0030175;GO:0030953;GO:0031532;GO:0031623;GO:0032532;GO:0032991;GO:0034236;GO:0034237;GO:0034629;GO:…	negative regulation of transcription by RNA polymerase II;fibrillar center;ruffle;immunological synapse;uropod;intestinal D-glucose absorption;morphogenesis of an epithelium;nematode larval development;sphingosine-1-phosphate receptor signaling pathway;structural molecule activity;cell;endosome;cytosol;actin filament;microvillus;brush border;focal adhesion;leukocyte cell-cell adhesion;microtubule…
adi2mcaRNA14033_R1	adi2mcaRNA14033_R1	513.915	481.652	EHB15701.1	73.6	1.1e-100	376.7	>EHB15701.1 Radixin [Heterocephalus glaber]	0	GO:0003779;GO:0005856	actin binding;cytoskeleton
adi2mcaRNA14041_R0	adi2mcaRNA14041_R0	0.924189	0	XP_015759956.1	75.1	0	1313.9	>XP_015759956.1 PREDICTED: testis-expressed sequence 11 protein-like [Acropora digitifera]	0	0	0
adi2mcaRNA14051_R0	adi2mcaRNA14051_R0	97.461	126.42	XP_015760021.1	78.2	1e-157	565.8	>XP_015760021.1 PREDICTED: dnaJ homolog subfamily C member 28-like [Acropora digitifera]	K19373	GO:0006890;GO:0007030;GO:0017119;GO:0048213	retrograde vesicle-mediated transport, Golgi to endoplasmic reticulum;Golgi organization;Golgi transport complex;Golgi vesicle prefusion complex stabilization
adi2mcaRNA14061_R0	adi2mcaRNA14061_R0	448.33	520.651	XP_015760025.1	94.5	4.3e-182	646.7	>XP_015760025.1 PREDICTED: probable palmitoyltransferase ZDHHC14 [Acropora digitifera]	K16675	GO:0005783;GO:0005794;GO:0006612;GO:0016021;GO:0018230;GO:0019706	endoplasmic reticulum;Golgi apparatus;protein targeting to membrane;integral component of membrane;peptidyl-L-cysteine S-palmitoylation;protein-cysteine S-palmitoyltransferase activity
adi2mcaRNA14064_R0	adi2mcaRNA14064_R0	156.259	72.5359	XP_020622823.1	79.3	6.5e-199	703.7	>XP_020622823.1 X-linked retinitis pigmentosa GTPase regulator-like isoform X2 [Orbicella faveolata]	K23573	0	0
adi2mcaRNA14068_R3	adi2mcaRNA14068_R3	0	0	PFX18570.1	44.2	7.3e-58	234.2	>PFX18570.1 Beta-1,3-galactosyltransferase brn [Stylophora pistillata]	0	0	0
adi2mcaRNA14068_R6	adi2mcaRNA14068_R6	0	0	PFX18570.1	44.1	3.6e-52	214.9	>PFX18570.1 Beta-1,3-galactosyltransferase brn [Stylophora pistillata]	0	0	0
adi2mcaRNA14068_R8	adi2mcaRNA14068_R8	0	0	PFX23171.1	68.8	4.3e-40	174.9	>PFX23171.1 hypothetical protein AWC38_SpisGene12289 [Stylophora pistillata]	0	0	0
adi2mcaRNA1407_R0	adi2mcaRNA1407_R0	965.363	457.935	XP_015758917.1	51.4	3.9e-160	575.9	>XP_015758917.1 PREDICTED: WASH complex subunit FAM21-like [Acropora digitifera]	K18462	0	0
adi2mcaRNA1408_R1	adi2mcaRNA1408_R1	17.3348	30.5857	XP_015760064.1	70.9	3e-158	568.2	>XP_015760064.1 PREDICTED: nucleolar and coiled-body phosphoprotein 1-like [Acropora digitifera]	0	0	0
adi2mcaRNA14091_R1	adi2mcaRNA14091_R1	0	0	KXJ15670.1	51.8	2e-82	315.5	>KXJ15670.1 ATP-dependent DNA helicase PIF1 [Exaiptasia pallida]	K15255	GO:0006259	DNA metabolic process
adi2mcaRNA14091_R2	adi2mcaRNA14091_R2	0	0	XP_020610138.1	49	1.3e-58	236.1	>XP_020610138.1 uncharacterized protein LOC110048702 [Orbicella faveolata]	0	GO:0006259	DNA metabolic process
adi2mcaRNA14091_R3	adi2mcaRNA14091_R3	0	0	XP_020610138.1	47.5	1.2e-56	229.6	>XP_020610138.1 uncharacterized protein LOC110048702 [Orbicella faveolata]	0	GO:0006259	DNA metabolic process
adi2mcaRNA14091_R6	adi2mcaRNA14091_R6	0	0	XP_020610138.1	49.1	1.2e-79	306.6	>XP_020610138.1 uncharacterized protein LOC110048702 [Orbicella faveolata]	0	GO:0006259	DNA metabolic process
adi2mcaRNA14091_R7	adi2mcaRNA14091_R7	0	0	XP_020610138.1	47.5	2.1e-86	328.9	>XP_020610138.1 uncharacterized protein LOC110048702 [Orbicella faveolata]	K15255	GO:0006259	DNA metabolic process
adi2mcaRNA14091_R8	adi2mcaRNA14091_R8	0	0	XP_020610138.1	82.4	2.5e-110	407.9	>XP_020610138.1 uncharacterized protein LOC110048702 [Orbicella faveolata]	0	GO:0000166;GO:0004386;GO:0006259;GO:0006974;GO:0051276	nucleotide binding;helicase activity;DNA metabolic process;cellular response to DNA damage stimulus;chromosome organization
adi2mcaRNA14092_R2	adi2mcaRNA14092_R2	0	0	XP_015772170.1	90.1	1e-56	229.6	>XP_015772170.1 PREDICTED: LOW QUALITY PROTEIN: reticulocyte-binding protein 2 homolog a-like [Acropora digitifera]	0	0	0
adi2mcaRNA14094_R5	adi2mcaRNA14094_R5	0	0	XP_015760074.1	55.4	1.7e-59	238.8	>XP_015760074.1 PREDICTED: uncharacterized protein LOC107339315 isoform X1 [Acropora digitifera]	0	0	0
adi2mcaRNA14095_R3	adi2mcaRNA14095_R3	0	0	XP_015760076.1	59.8	2.7e-58	234.6	>XP_015760076.1 PREDICTED: uncharacterized protein LOC107339315 isoform X2 [Acropora digitifera]	0	0	0
adi2mcaRNA14098_R3	adi2mcaRNA14098_R3	0	0	XP_022780497.1	75	6.2e-103	383.3	>XP_022780497.1 uncharacterized protein LOC111321794 [Stylophora pistillata]	0	0	0
adi2mcaRNA14098_R5	adi2mcaRNA14098_R5	0	0	XP_015768055.1	93	2e-136	494.6	>XP_015768055.1 PREDICTED: uncharacterized protein LOC107346750 [Acropora digitifera]	0	0	0
adi2mcaRNA14099_R2	adi2mcaRNA14099_R2	0	0	XP_015760056.1	92.3	6.1e-97	363.6	>XP_015760056.1 PREDICTED: zinc finger and SCAN domain-containing protein 20-like [Acropora digitifera]	0	0	0
adi2mcaRNA14103_R2	adi2mcaRNA14103_R2	0	0	XP_015760079.1	51	1.6e-171	612.5	>XP_015760079.1 PREDICTED: mediator of RNA polymerase II transcription subunit 34-like [Acropora digitifera]	0	GO:0004386;GO:0005622;GO:0006259;GO:0110165	helicase activity;intracellular;DNA metabolic process;cellular anatomical entity
adi2mcaRNA14103_R3	adi2mcaRNA14103_R3	0	0	XP_020618505.1	78.6	2.3e-287	997.3	>XP_020618505.1 LOW QUALITY PROTEIN: putative ATP-dependent DNA helicase Q1 [Orbicella faveolata]	0	GO:0004386;GO:0005622;GO:0006259;GO:0097159;GO:0110165;GO:1901363	helicase activity;intracellular;DNA metabolic process;organic cyclic compound binding;cellular anatomical entity;heterocyclic compound binding
adi2mcaRNA14103_R4	adi2mcaRNA14103_R4	0	0	XP_020618505.1	78.3	7.2e-284	985.7	>XP_020618505.1 LOW QUALITY PROTEIN: putative ATP-dependent DNA helicase Q1 [Orbicella faveolata]	0	GO:0004386;GO:0005622;GO:0006259;GO:0097159;GO:0110165;GO:1901363	helicase activity;intracellular;DNA metabolic process;organic cyclic compound binding;cellular anatomical entity;heterocyclic compound binding
adi2mcaRNA14104_R2	adi2mcaRNA14104_R2	0	0	XP_015760080.1	86.6	1.2e-81	312	>XP_015760080.1 PREDICTED: uncharacterized protein LOC107339321 [Acropora digitifera]	0	0	0
adi2mcaRNA14105_R7	adi2mcaRNA14105_R7	0	0	XP_015760041.1	75.8	5.7e-81	310.1	>XP_015760041.1 PREDICTED: uncharacterized protein LOC107339291 [Acropora digitifera]	0	0	0
adi2mcaRNA14107_R3	adi2mcaRNA14107_R3	0	0	XP_015760043.1	56.1	3.1e-58	234.6	>XP_015760043.1 PREDICTED: uncharacterized protein LOC107339293 [Acropora digitifera]	0	0	0
adi2mcaRNA14108_R2	adi2mcaRNA14108_R2	0	0	XP_015760045.1	94.9	4.4e-108	400.2	>XP_015760045.1 PREDICTED: uncharacterized protein LOC107339294 [Acropora digitifera]	0	0	0
adi2mcaRNA14108_R3	adi2mcaRNA14108_R3	0	0	XP_015760045.1	97.6	1e-109	405.6	>XP_015760045.1 PREDICTED: uncharacterized protein LOC107339294 [Acropora digitifera]	0	0	0
adi2mcaRNA14108_R5	adi2mcaRNA14108_R5	0	0	XP_015760045.1	94.4	1.3e-107	398.7	>XP_015760045.1 PREDICTED: uncharacterized protein LOC107339294 [Acropora digitifera]	0	0	0
adi2mcaRNA14108_R6	adi2mcaRNA14108_R6	0	0	XP_015760045.1	93.9	2.9e-107	397.5	>XP_015760045.1 PREDICTED: uncharacterized protein LOC107339294 [Acropora digitifera]	0	0	0
adi2mcaRNA14108_R7	adi2mcaRNA14108_R7	0	0	XP_015760045.1	94	1.1e-106	395.6	>XP_015760045.1 PREDICTED: uncharacterized protein LOC107339294 [Acropora digitifera]	0	0	0
adi2mcaRNA14108_R8	adi2mcaRNA14108_R8	0	0	XP_015760045.1	92.1	1.2e-102	382.1	>XP_015760045.1 PREDICTED: uncharacterized protein LOC107339294 [Acropora digitifera]	0	0	0
adi2mcaRNA14109_R0	adi2mcaRNA14109_R0	0	0	XP_015760046.1	74.8	0	1252.3	>XP_015760046.1 PREDICTED: uncharacterized protein LOC107339295 [Acropora digitifera]	0	0	0
adi2mcaRNA14109_R2	adi2mcaRNA14109_R2	0	0	XP_015760046.1	53	9.6e-194	686.4	>XP_015760046.1 PREDICTED: uncharacterized protein LOC107339295 [Acropora digitifera]	0	0	0
adi2mcaRNA14110_R3	adi2mcaRNA14110_R3	0	0	XP_015760081.1	70.8	1.5e-197	698.4	>XP_015760081.1 PREDICTED: uncharacterized protein LOC107339322 [Acropora digitifera]	0	0	0
adi2mcaRNA14111_R1	adi2mcaRNA14111_R1	0	0	XP_015760083.1	81.3	3.2e-261	910.2	>XP_015760083.1 PREDICTED: uncharacterized protein LOC107339324 [Acropora digitifera]	0	0	0
adi2mcaRNA14111_R2	adi2mcaRNA14111_R2	0	0	XP_015760083.1	78.2	2.7e-249	870.5	>XP_015760083.1 PREDICTED: uncharacterized protein LOC107339324 [Acropora digitifera]	0	0	0
adi2mcaRNA14111_R3	adi2mcaRNA14111_R3	0	0	XP_015760083.1	83.6	1.5e-241	844.7	>XP_015760083.1 PREDICTED: uncharacterized protein LOC107339324 [Acropora digitifera]	0	0	0
adi2mcaRNA14111_R4	adi2mcaRNA14111_R4	0	0	XP_015760083.1	57.2	1.7e-153	552	>XP_015760083.1 PREDICTED: uncharacterized protein LOC107339324 [Acropora digitifera]	0	0	0
adi2mcaRNA14111_R7	adi2mcaRNA14111_R7	0	0	XP_015760083.1	57.6	4.1e-102	380.9	>XP_015760083.1 PREDICTED: uncharacterized protein LOC107339324 [Acropora digitifera]	0	0	0
adi2mcaRNA14116_R5	adi2mcaRNA14116_R5	0	0	XP_015762208.1	82.6	8e-123	449.5	>XP_015762208.1 PREDICTED: uncharacterized protein K02A2.6-like [Acropora digitifera]	0	0	0
adi2mcaRNA14116_R8	adi2mcaRNA14116_R8	0	0	XP_015762208.1	77	1.6e-118	435.3	>XP_015762208.1 PREDICTED: uncharacterized protein K02A2.6-like [Acropora digitifera]	0	0	0
adi2mcaRNA14136_R0	adi2mcaRNA14136_R0	0	0	XP_015760103.1	62.1	4.8e-255	889.8	>XP_015760103.1 PREDICTED: 52 kDa repressor of the inhibitor of the protein kinase-like [Acropora digitifera]	0	0	0
adi2mcaRNA14136_R1	adi2mcaRNA14136_R1	0	0	XP_015760103.1	64.2	3.3e-265	923.7	>XP_015760103.1 PREDICTED: 52 kDa repressor of the inhibitor of the protein kinase-like [Acropora digitifera]	0	0	0
adi2mcaRNA14136_R3	adi2mcaRNA14136_R3	0	0	XP_015760103.1	40.1	1.1e-153	553.5	>XP_015760103.1 PREDICTED: 52 kDa repressor of the inhibitor of the protein kinase-like [Acropora digitifera]	0	0	0
adi2mcaRNA14143_R3	adi2mcaRNA14143_R3	0	0	XP_015780071.1	78.5	3e-113	417.5	>XP_015780071.1 PREDICTED: dimethlysulfonioproprionate lyase 7-like [Acropora digitifera]	0	GO:0047869	dimethylpropiothetin dethiomethylase activity
adi2mcaRNA14160_R0	adi2mcaRNA14160_R0	1.70774	0	XP_015760125.1	83	1.1e-238	835.1	>XP_015760125.1 PREDICTED: macrophage mannose receptor 1-like [Acropora digitifera]	0	0	0
adi2mcaRNA14164_R4	adi2mcaRNA14164_R4	0	0	XP_015760127.1	47.6	7.7e-17	96.7	>XP_015760127.1 PREDICTED: uncharacterized protein LOC107339366 isoform X1 [Acropora digitifera]	0	0	0
adi2mcaRNA14178_R1	adi2mcaRNA14178_R1	0	0	XP_015760137.1	78.1	2.3e-97	365.2	>XP_015760137.1 PREDICTED: putative cyclin-dependent serine/threonine-protein kinase DDB_G0272797/DDB_G0274007 [Acropora digitifera]	0	0	0
adi2mcaRNA14178_R2	adi2mcaRNA14178_R2	0	0	XP_015760137.1	73.7	2.1e-79	305.4	>XP_015760137.1 PREDICTED: putative cyclin-dependent serine/threonine-protein kinase DDB_G0272797/DDB_G0274007 [Acropora digitifera]	0	0	0
adi2mcaRNA14180_R5	adi2mcaRNA14180_R5	0	0	XP_020617219.1	35.9	7.9e-14	86.3	>XP_020617219.1 uncharacterized protein LOC110055191 [Orbicella faveolata]	0	0	0
adi2mcaRNA14181_R0	adi2mcaRNA14181_R0	0	0	XP_015760139.1	81.7	3.3e-169	604	>XP_015760139.1 PREDICTED: uncharacterized protein KIAA1958-like [Acropora digitifera]	K21754	0	0
adi2mcaRNA14181_R1	adi2mcaRNA14181_R1	0	0	XP_015760139.1	74.5	5.7e-150	540	>XP_015760139.1 PREDICTED: uncharacterized protein KIAA1958-like [Acropora digitifera]	K21754	0	0
adi2mcaRNA14181_R2	adi2mcaRNA14181_R2	0	0	XP_015760139.1	76.6	6e-149	536.6	>XP_015760139.1 PREDICTED: uncharacterized protein KIAA1958-like [Acropora digitifera]	K21754	0	0
adi2mcaRNA14181_R3	adi2mcaRNA14181_R3	0	0	XP_015760139.1	76.1	3.8e-148	533.9	>XP_015760139.1 PREDICTED: uncharacterized protein KIAA1958-like [Acropora digitifera]	K21754	0	0
adi2mcaRNA14181_R7	adi2mcaRNA14181_R7	0	0	XP_015760139.1	83.1	1e-108	402.5	>XP_015760139.1 PREDICTED: uncharacterized protein KIAA1958-like [Acropora digitifera]	K21754	0	0
adi2mcaRNA14181_R9	adi2mcaRNA14181_R9	0	0	XP_020627729.1	62.1	3.4e-130	474.6	>XP_020627729.1 uncharacterized protein LOC110064967 [Orbicella faveolata]	K21754	GO:0003677;GO:0006310;GO:0015074	DNA binding;DNA recombination;DNA integration
adi2mcaRNA14204_R4	adi2mcaRNA14204_R4	0	0	XP_022783170.1	45.8	1.8e-71	279.6	>XP_022783170.1 uncharacterized protein LOC111323973 [Stylophora pistillata]	0	0	0
adi2mcaRNA14204_R6	adi2mcaRNA14204_R6	7.76147	13.7902	XP_022783214.1	54.9	2.3e-64	255.8	>XP_022783214.1 titin-like isoform X1 [Stylophora pistillata]	0	GO:0016311;GO:0016791	dephosphorylation;phosphatase activity
adi2mcaRNA14204_R9	adi2mcaRNA14204_R9	0	5.24504	XP_022808475.1	50.2	1.8e-62	249.6	>XP_022808475.1 receptor-type tyrosine-protein phosphatase F-like [Stylophora pistillata]	0	GO:0016311;GO:0016791	dephosphorylation;phosphatase activity
adi2mcaRNA14205_R3	adi2mcaRNA14205_R3	0	0	XP_022783219.1	44.3	8e-72	280.8	>XP_022783219.1 protein sidekick-2-like isoform X1 [Stylophora pistillata]	0	0	0
adi2mcaRNA14205_R4	adi2mcaRNA14205_R4	0	0	XP_022783217.1	44.9	1e-65	260.4	>XP_022783217.1 titin-like isoform X4 [Stylophora pistillata]	0	0	0
adi2mcaRNA14205_R5	adi2mcaRNA14205_R5	0	0	XP_022807816.1	51.5	2.6e-65	258.8	>XP_022807816.1 uncharacterized protein LOC111344820 [Stylophora pistillata]	0	0	0
adi2mcaRNA14205_R6	adi2mcaRNA14205_R6	0	0	XP_022808475.1	52.4	3.8e-65	258.5	>XP_022808475.1 receptor-type tyrosine-protein phosphatase F-like [Stylophora pistillata]	0	GO:0016311;GO:0016791	dephosphorylation;phosphatase activity
adi2mcaRNA14205_R8	adi2mcaRNA14205_R8	6.05983	0	XP_022808475.1	52	7e-66	260.8	>XP_022808475.1 receptor-type tyrosine-protein phosphatase F-like [Stylophora pistillata]	0	0	0
adi2mcaRNA14213_R4	adi2mcaRNA14213_R4	0	0	XP_015760150.1	72.4	7.5e-59	236.9	>XP_015760150.1 PREDICTED: myelin transcription factor 1-like protein [Acropora digitifera]	0	0	0
adi2mcaRNA14213_R7	adi2mcaRNA14213_R7	0	0	XP_015760150.1	72.3	1.8e-54	222.2	>XP_015760150.1 PREDICTED: myelin transcription factor 1-like protein [Acropora digitifera]	0	0	0
adi2mcaRNA14213_R8	adi2mcaRNA14213_R8	5.76072	0	XP_015760150.1	70.4	1.9e-49	205.7	>XP_015760150.1 PREDICTED: myelin transcription factor 1-like protein [Acropora digitifera]	0	0	0
adi2mcaRNA14220_R5	adi2mcaRNA14220_R5	0	0	XP_015760175.1	89	4.6e-223	783.1	>XP_015760175.1 PREDICTED: uncharacterized protein LOC107339409 isoform X1 [Acropora digitifera]	0	GO:0005044;GO:0006897;GO:0016020	scavenger receptor activity;endocytosis;membrane
adi2mcaRNA14223_R3	adi2mcaRNA14223_R3	0	0	XP_015760172.1	87.7	0	1106.7	>XP_015760172.1 PREDICTED: uncharacterized protein LOC107339408 isoform X1 [Acropora digitifera]	0	0	0
adi2mcaRNA14223_R4	adi2mcaRNA14223_R4	0	0	XP_015760172.1	82.2	3.1e-289	1003.4	>XP_015760172.1 PREDICTED: uncharacterized protein LOC107339408 isoform X1 [Acropora digitifera]	0	0	0
adi2mcaRNA14223_R7	adi2mcaRNA14223_R7	0	0	XP_015760172.1	85.6	9.4e-177	629.4	>XP_015760172.1 PREDICTED: uncharacterized protein LOC107339408 isoform X1 [Acropora digitifera]	0	0	0
adi2mcaRNA14244_R1	adi2mcaRNA14244_R1	377.931	940.577	XP_015760185.1	73.7	1.2e-113	419.1	>XP_015760185.1 PREDICTED: 1-acyl-sn-glycerol-3-phosphate acyltransferase alpha-like [Acropora digitifera]	K13509	GO:0008654;GO:0016746;GO:0110165	phospholipid biosynthetic process;transferase activity, transferring acyl groups;cellular anatomical entity
adi2mcaRNA14247_R1	adi2mcaRNA14247_R1	104.499	38.8211	XP_015760157.1	66.3	4.5e-178	634	>XP_015760157.1 PREDICTED: ZZ-type zinc finger-containing protein 3-like [Acropora digitifera]	0	GO:0005488	binding
adi2mcaRNA14262_R0	adi2mcaRNA14262_R0	0	0	XP_015760196.1	69.6	8.4e-263	916.4	>XP_015760196.1 PREDICTED: uncharacterized protein LOC107339429 isoform X1 [Acropora digitifera]	0	0	0
adi2mcaRNA14264_R0	adi2mcaRNA14264_R0	0	0	XP_015760195.1	70.2	0	1104.7	>XP_015760195.1 PREDICTED: uncharacterized protein LOC107339428 [Acropora digitifera]	0	GO:0008201;GO:0009986	heparin binding;cell surface
adi2mcaRNA14268_R0	adi2mcaRNA14268_R0	0	0.597069	XP_015760208.1	67.8	2.4e-88	335.9	>XP_015760208.1 PREDICTED: proline-rich protein 36-like [Acropora digitifera]	0	GO:0008201;GO:0009986	heparin binding;cell surface
adi2mcaRNA14313_R3	adi2mcaRNA14313_R3	0	0	XP_015760225.1	77.9	1.3e-278	968.4	>XP_015760225.1 PREDICTED: zinc finger protein 862-like [Acropora digitifera]	0	0	0
adi2mcaRNA14313_R4	adi2mcaRNA14313_R4	0	0	XP_015760225.1	73.7	4.4e-249	870.2	>XP_015760225.1 PREDICTED: zinc finger protein 862-like [Acropora digitifera]	0	0	0
adi2mcaRNA14314_R1	adi2mcaRNA14314_R1	0	0	XP_015760226.1	79.2	0	2380.5	>XP_015760226.1 PREDICTED: uncharacterized protein LOC107339452 [Acropora digitifera]	0	GO:0005488	binding
adi2mcaRNA14314_R2	adi2mcaRNA14314_R2	0	0	XP_015760226.1	77.4	0	2323.5	>XP_015760226.1 PREDICTED: uncharacterized protein LOC107339452 [Acropora digitifera]	0	0	0
adi2mcaRNA14314_R6	adi2mcaRNA14314_R6	0	0	XP_015760226.1	70.6	0	1859.3	>XP_015760226.1 PREDICTED: uncharacterized protein LOC107339452 [Acropora digitifera]	0	0	0
adi2mcaRNA14314_R7	adi2mcaRNA14314_R7	0	0	XP_015760226.1	50.1	0	1482.2	>XP_015760226.1 PREDICTED: uncharacterized protein LOC107339452 [Acropora digitifera]	0	0	0
adi2mcaRNA14314_R9	adi2mcaRNA14314_R9	0	0	XP_015760226.1	49.9	0	1478.4	>XP_015760226.1 PREDICTED: uncharacterized protein LOC107339452 [Acropora digitifera]	0	0	0
adi2mcaRNA14326_R5	adi2mcaRNA14326_R5	0	0	XP_020623151.1	49.8	2.5e-72	282	>XP_020623151.1 pyroglutamylated RFamide peptide receptor-like isoform X2 [Orbicella faveolata]	0	0	0
adi2mcaRNA14336_R3	adi2mcaRNA14336_R3	0	67.5331	XP_015761372.1	48.6	6.9e-33	150.2	>XP_015761372.1 PREDICTED: neuromedin-K receptor-like [Acropora digitifera]	0	0	0
adi2mcaRNA14342_R0	adi2mcaRNA14342_R0	83.8399	124.206	XP_015760283.1	63	3.7e-83	317.8	>XP_015760283.1 PREDICTED: uncharacterized protein LOC107339491 [Acropora digitifera]	0	GO:0003723;GO:0005634;GO:0010468;GO:0052907;GO:0070475	RNA binding;nucleus;regulation of gene expression;23S rRNA (adenine(1618)-N(6))-methyltransferase activity;rRNA base methylation
adi2mcaRNA14342_R1	adi2mcaRNA14342_R1	45.3208	19.4287	XP_015760283.1	61.3	2.3e-79	305.1	>XP_015760283.1 PREDICTED: uncharacterized protein LOC107339491 [Acropora digitifera]	0	GO:0003723;GO:0005634;GO:0010468;GO:0052907;GO:0070475	RNA binding;nucleus;regulation of gene expression;23S rRNA (adenine(1618)-N(6))-methyltransferase activity;rRNA base methylation
adi2mcaRNA14342_R2	adi2mcaRNA14342_R2	0	0	XP_020602625.1	67.3	1.3e-28	136	>XP_020602625.1 methyltransferase-like protein 16 [Orbicella faveolata]	0	GO:0001510;GO:0003677;GO:0006310;GO:0008173;GO:0015074	RNA methylation;DNA binding;DNA recombination;RNA methyltransferase activity;DNA integration
adi2mcaRNA14342_R6	adi2mcaRNA14342_R6	0	0	XP_020602625.1	69.2	1e-30	142.5	>XP_020602625.1 methyltransferase-like protein 16 [Orbicella faveolata]	0	GO:0001510;GO:0003723;GO:0008173;GO:0008757;GO:0010608;GO:0010629;GO:0034660;GO:1903311	RNA methylation;RNA binding;RNA methyltransferase activity;S-adenosylmethionine-dependent methyltransferase activity;posttranscriptional regulation of gene expression;negative regulation of gene expression;ncRNA metabolic process;regulation of mRNA metabolic process
adi2mcaRNA14342_R7	adi2mcaRNA14342_R7	0	0	XP_020602625.1	66.3	6.9e-27	130.2	>XP_020602625.1 methyltransferase-like protein 16 [Orbicella faveolata]	0	GO:0001510;GO:0003677;GO:0006310;GO:0008173;GO:0015074	RNA methylation;DNA binding;DNA recombination;RNA methyltransferase activity;DNA integration
adi2mcaRNA14342_R8	adi2mcaRNA14342_R8	0	0	XP_020602625.1	66.4	7.8e-31	142.9	>XP_020602625.1 methyltransferase-like protein 16 [Orbicella faveolata]	0	GO:0001510;GO:0003723;GO:0008173;GO:0008757;GO:0010608;GO:0010629;GO:0034660;GO:1903311	RNA methylation;RNA binding;RNA methyltransferase activity;S-adenosylmethionine-dependent methyltransferase activity;posttranscriptional regulation of gene expression;negative regulation of gene expression;ncRNA metabolic process;regulation of mRNA metabolic process
adi2mcaRNA14346_R1	adi2mcaRNA14346_R1	76.1199	21.5035	XP_015760315.1	78.8	1.2e-43	185.3	>XP_015760315.1 PREDICTED: UPF0545 protein C22orf39 homolog isoform X7 [Acropora digitifera]	0	0	0
adi2mcaRNA14348_R7	adi2mcaRNA14348_R7	0	0	XP_015776331.1	77.8	5.4e-24	119.8	>XP_015776331.1 PREDICTED: methyltransferase-like protein 16, partial [Acropora digitifera]	0	GO:0003723;GO:0005634;GO:0006260;GO:0010608;GO:0052907;GO:0070475;GO:1903311	RNA binding;nucleus;DNA replication;posttranscriptional regulation of gene expression;23S rRNA (adenine(1618)-N(6))-methyltransferase activity;rRNA base methylation;regulation of mRNA metabolic process
adi2mcaRNA14354_R0	adi2mcaRNA14354_R0	0	0	XP_020602625.1	74.7	5.1e-33	149.8	>XP_020602625.1 methyltransferase-like protein 16 [Orbicella faveolata]	0	GO:0003723;GO:0005634;GO:0010468;GO:0052907;GO:0070475	RNA binding;nucleus;regulation of gene expression;23S rRNA (adenine(1618)-N(6))-methyltransferase activity;rRNA base methylation
adi2mcaRNA14354_R9	adi2mcaRNA14354_R9	0	0	XP_020602625.1	71.6	6.9e-30	139.4	>XP_020602625.1 methyltransferase-like protein 16 [Orbicella faveolata]	0	GO:0003723;GO:0005634;GO:0010468;GO:0052907;GO:0070475	RNA binding;nucleus;regulation of gene expression;23S rRNA (adenine(1618)-N(6))-methyltransferase activity;rRNA base methylation
adi2mcaRNA14362_R4	adi2mcaRNA14362_R4	0	0	#N/A	#N/A	#N/A	#N/A	#N/A	0	0	0
adi2mcaRNA14379_R0	adi2mcaRNA14379_R0	0	0	XP_015760332.1	54.6	9.4e-153	550.1	>XP_015760332.1 PREDICTED: uncharacterized skeletal organic matrix protein 1-like isoform X2 [Acropora digitifera]	0	0	0
adi2mcaRNA14388_R0	adi2mcaRNA14388_R0	5.18522	6.21813	XP_015760336.1	73.1	1.1e-236	828.9	>XP_015760336.1 PREDICTED: neuronal acetylcholine receptor subunit alpha-10-like [Acropora digitifera]	0	GO:0005216;GO:0005887;GO:0007165;GO:0007268;GO:0034220;GO:0042391;GO:0043005;GO:0045202;GO:0050877	ion channel activity;integral component of plasma membrane;signal transduction;chemical synaptic transmission;ion transmembrane transport;regulation of membrane potential;neuron projection;synapse;nervous system process
adi2mcaRNA14388_R1	adi2mcaRNA14388_R1	0	0.99741	XP_015760336.1	72.8	2.7e-235	824.3	>XP_015760336.1 PREDICTED: neuronal acetylcholine receptor subunit alpha-10-like [Acropora digitifera]	0	GO:0005216;GO:0005887;GO:0007165;GO:0007268;GO:0034220;GO:0042391;GO:0043005;GO:0045202;GO:0050877	ion channel activity;integral component of plasma membrane;signal transduction;chemical synaptic transmission;ion transmembrane transport;regulation of membrane potential;neuron projection;synapse;nervous system process
adi2mcaRNA14391_R0	adi2mcaRNA14391_R0	50.4462	13.338	XP_015760338.1	59.4	1.1e-60	242.7	>XP_015760338.1 PREDICTED: uncharacterized protein LOC107339542 [Acropora digitifera]	0	0	0
adi2mcaRNA14405_R3	adi2mcaRNA14405_R3	1.26499	11.9803	XP_020609879.1	71.1	7.9e-243	849.4	>XP_020609879.1 gamma-glutamyltranspeptidase 1-like [Orbicella faveolata]	K18592	GO:0006518;GO:0016020;GO:0140096	peptide metabolic process;membrane;catalytic activity, acting on a protein
adi2mcaRNA14405_R4	adi2mcaRNA14405_R4	0	0	XP_020609879.1	77.4	1.6e-247	864.8	>XP_020609879.1 gamma-glutamyltranspeptidase 1-like [Orbicella faveolata]	K18592	GO:0000048;GO:0005886;GO:0006751;GO:0036374	peptidyltransferase activity;plasma membrane;glutathione catabolic process;glutathione hydrolase activity
adi2mcaRNA14414_R7	adi2mcaRNA14414_R7	0	0	XP_015760296.1	95.9	1.5e-31	144.4	>XP_015760296.1 PREDICTED: protein CASP-like, partial [Acropora digitifera]	0	GO:0006891;GO:0030173	intra-Golgi vesicle-mediated transport;integral component of Golgi membrane
adi2mcaRNA14416_R4	adi2mcaRNA14416_R4	0	0	XP_015760356.1	64.3	4e-148	534.3	>XP_015760356.1 PREDICTED: BTB/POZ domain-containing protein 6-like [Acropora digitifera]	0	0	0
adi2mcaRNA14417_R1	adi2mcaRNA14417_R1	0	0	XP_015760357.1	75.2	3.2e-103	384	>XP_015760357.1 PREDICTED: papilin-like [Acropora digitifera]	0	0	0
adi2mcaRNA14418_R3	adi2mcaRNA14418_R3	0	0	XP_020905701.1	44.9	4.3e-39	170.6	>XP_020905701.1 histone-lysine N-methyltransferase SUV39H2-like, partial [Exaiptasia pallida]	0	0	0
adi2mcaRNA14419_R0	adi2mcaRNA14419_R0	0	0	KXJ08863.1	48	1.8e-26	128.6	>KXJ08863.1 hypothetical protein AC249_AIPGENE14727 [Exaiptasia pallida]	0	0	0
adi2mcaRNA14419_R4	adi2mcaRNA14419_R4	0	0	XP_020604789.1	51.8	3.7e-38	167.5	>XP_020604789.1 uncharacterized protein LOC110043654 [Orbicella faveolata]	0	0	0
adi2mcaRNA14419_R8	adi2mcaRNA14419_R8	0	0	XP_020604789.1	53	5.2e-40	173.7	>XP_020604789.1 uncharacterized protein LOC110043654 [Orbicella faveolata]	0	0	0
adi2mcaRNA1443_R0	adi2mcaRNA1443_R0	1400.6	1684.14	XP_015758965.1	89.3	0	3853.1	>XP_015758965.1 PREDICTED: DNA polymerase epsilon catalytic subunit A-like [Acropora digitifera]	K02324	GO:0000166;GO:0000278;GO:0003677;GO:0003887;GO:0006272;GO:0006287;GO:0006297;GO:0008270;GO:0008310;GO:0008622;GO:0045004;GO:0051539;GO:0071897;GO:0090305	nucleotide binding;mitotic cell cycle;DNA binding;DNA-directed DNA polymerase activity;leading strand elongation;base-excision repair, gap-filling;nucleotide-excision repair, DNA gap filling;zinc ion binding;single-stranded DNA 3'-5' exodeoxyribonuclease activity;epsilon DNA polymerase complex;DNA replication proofreading;4 iron, 4 sulfur cluster binding;DNA biosynthetic process;nucleic acid phos…
adi2mcaRNA14437_R2	adi2mcaRNA14437_R2	0	0	XP_022794536.1	63.3	0	1225.3	>XP_022794536.1 uncharacterized protein LOC111333254 [Stylophora pistillata]	0	GO:0016787	hydrolase activity
adi2mcaRNA14437_R3	adi2mcaRNA14437_R3	0	0	KXJ28348.1	39	1.2e-224	789.6	>KXJ28348.1 Acetylcholinesterase [Exaiptasia pallida]	0	GO:0016020;GO:0016787	membrane;hydrolase activity
adi2mcaRNA14447_R4	adi2mcaRNA14447_R4	0	0	XP_015760377.1	48.8	0	1120.1	>XP_015760377.1 PREDICTED: uncharacterized protein LOC107339570 [Acropora digitifera]	0	0	0
adi2mcaRNA14447_R5	adi2mcaRNA14447_R5	0	0	XP_015760377.1	44.7	0	1069.7	>XP_015760377.1 PREDICTED: uncharacterized protein LOC107339570 [Acropora digitifera]	0	GO:0003824;GO:0044260;GO:0090304	catalytic activity;cellular macromolecule metabolic process;nucleic acid metabolic process
adi2mcaRNA14447_R6	adi2mcaRNA14447_R6	0	0	XP_015760377.1	43.5	3.7e-294	1020.8	>XP_015760377.1 PREDICTED: uncharacterized protein LOC107339570 [Acropora digitifera]	0	GO:0003824;GO:0044260;GO:0090304	catalytic activity;cellular macromolecule metabolic process;nucleic acid metabolic process
adi2mcaRNA14447_R8	adi2mcaRNA14447_R8	0	0	XP_015752345.1	56.9	0	1135.2	>XP_015752345.1 PREDICTED: RNA-directed DNA polymerase from mobile element jockey-like [Acropora digitifera]	0	GO:0006807;GO:0043170;GO:0044237;GO:0044238	nitrogen compound metabolic process;macromolecule metabolic process;cellular metabolic process;primary metabolic process
adi2mcaRNA14447_R9	adi2mcaRNA14447_R9	0	0	XP_015760377.1	46.7	5.6e-305	1056.6	>XP_015760377.1 PREDICTED: uncharacterized protein LOC107339570 [Acropora digitifera]	0	0	0
adi2mcaRNA14456_R2	adi2mcaRNA14456_R2	0	0	XP_015760395.1	87.2	3.1e-144	520.8	>XP_015760395.1 PREDICTED: uncharacterized protein LOC107339593 [Acropora digitifera]	0	GO:0003677;GO:0006310;GO:0008270;GO:0015074	DNA binding;DNA recombination;zinc ion binding;DNA integration
adi2mcaRNA14456_R7	adi2mcaRNA14456_R7	0	0	XP_015760395.1	68.2	2.7e-111	411.4	>XP_015760395.1 PREDICTED: uncharacterized protein LOC107339593 [Acropora digitifera]	0	GO:0003676;GO:0006259;GO:0046872	nucleic acid binding;DNA metabolic process;metal ion binding
adi2mcaRNA14457_R1	adi2mcaRNA14457_R1	0	0	XP_015760378.1	77.4	0	2395.9	>XP_015760378.1 PREDICTED: uncharacterized protein LOC107339571 [Acropora digitifera]	0	0	0
adi2mcaRNA14457_R2	adi2mcaRNA14457_R2	0	0	XP_015760378.1	66.5	0	1920.2	>XP_015760378.1 PREDICTED: uncharacterized protein LOC107339571 [Acropora digitifera]	0	0	0
adi2mcaRNA1446_R1	adi2mcaRNA1446_R1	0	0	XP_015760337.1	69.8	2e-273	951	>XP_015760337.1 PREDICTED: beta-1,4-N-acetylgalactosaminyltransferase 3-like [Acropora digitifera]	0	GO:0005794;GO:0008376	Golgi apparatus;acetylgalactosaminyltransferase activity
adi2mcaRNA1446_R3	adi2mcaRNA1446_R3	0	0	XP_015760337.1	49.5	3.2e-164	587.8	>XP_015760337.1 PREDICTED: beta-1,4-N-acetylgalactosaminyltransferase 3-like [Acropora digitifera]	0	0	0
adi2mcaRNA14468_R0	adi2mcaRNA14468_R0	0	0	XP_015760403.1	41.7	9.5e-21	109.4	>XP_015760403.1 PREDICTED: uncharacterized protein LOC107339600 [Acropora digitifera]	0	0	0
adi2mcaRNA14468_R1	adi2mcaRNA14468_R1	0	0	XP_015760403.1	41.7	9.5e-21	109.4	>XP_015760403.1 PREDICTED: uncharacterized protein LOC107339600 [Acropora digitifera]	0	0	0
adi2mcaRNA14468_R2	adi2mcaRNA14468_R2	33.4928	0	XP_015760403.1	48.4	4.2e-20	107.5	>XP_015760403.1 PREDICTED: uncharacterized protein LOC107339600 [Acropora digitifera]	0	0	0
adi2mcaRNA1448_R2	adi2mcaRNA1448_R2	0	0	XP_015758973.1	89.5	1.2e-85	325.5	>XP_015758973.1 PREDICTED: uncharacterized protein LOC107338250 [Acropora digitifera]	0	0	0
adi2mcaRNA1448_R7	adi2mcaRNA1448_R7	0	0	XP_015758973.1	89	1e-80	309.7	>XP_015758973.1 PREDICTED: uncharacterized protein LOC107338250 [Acropora digitifera]	0	0	0
adi2mcaRNA14488_R0	adi2mcaRNA14488_R0	3.63685	0	XP_015760392.1	47.9	2e-44	188.7	>XP_015760392.1 PREDICTED: melanocyte-stimulating hormone receptor-like [Acropora digitifera]	0	0	0
adi2mcaRNA1449_R3	adi2mcaRNA1449_R3	0	0	XP_015759422.1	82.3	2.3e-135	491.5	>XP_015759422.1 PREDICTED: uncharacterized protein LOC107338704 [Acropora digitifera]	0	0	0
adi2mcaRNA1449_R4	adi2mcaRNA1449_R4	0	0	XP_015759422.1	89.7	1.3e-138	502.7	>XP_015759422.1 PREDICTED: uncharacterized protein LOC107338704 [Acropora digitifera]	0	0	0
adi2mcaRNA14492_R4	adi2mcaRNA14492_R4	0	0	XP_015760386.1	56.2	1.1e-09	71.6	>XP_015760386.1 PREDICTED: uncharacterized protein LOC107339580 [Acropora digitifera]	0	0	0
adi2mcaRNA14496_R0	adi2mcaRNA14496_R0	0	0	PFX22399.1	87.9	3.8e-216	760.4	>PFX22399.1 Zinc finger protein 862 [Stylophora pistillata]	0	GO:0046983	protein dimerization activity
adi2mcaRNA14496_R1	adi2mcaRNA14496_R1	0	0	XP_022781170.1	86.1	3.9e-202	713.8	>XP_022781170.1 zinc finger protein 862-like [Stylophora pistillata]	0	GO:0046983	protein dimerization activity
adi2mcaRNA14499_R3	adi2mcaRNA14499_R3	0	0	XP_015760439.1	56.2	5.2e-186	660.6	>XP_015760439.1 PREDICTED: poly [ADP-ribose] polymerase 12-like [Acropora digitifera]	K15259	0	0
adi2mcaRNA14500_R3	adi2mcaRNA14500_R3	0	0	XP_015760438.1	94.6	0	1646.3	>XP_015760438.1 PREDICTED: uncharacterized protein K02A2.6-like [Acropora digitifera]	0	GO:0005488	binding
adi2mcaRNA14500_R9	adi2mcaRNA14500_R9	0	0	XP_015760438.1	93.9	0	1629	>XP_015760438.1 PREDICTED: uncharacterized protein K02A2.6-like [Acropora digitifera]	0	GO:0005488	binding
adi2mcaRNA14505_R1	adi2mcaRNA14505_R1	0	0	XP_015760440.1	80.4	0	3068.9	>XP_015760440.1 PREDICTED: uncharacterized protein LOC107339638 [Acropora digitifera]	0	0	0
adi2mcaRNA14505_R2	adi2mcaRNA14505_R2	0	0	XP_015760440.1	79.3	0	3042.7	>XP_015760440.1 PREDICTED: uncharacterized protein LOC107339638 [Acropora digitifera]	0	0	0
adi2mcaRNA14505_R3	adi2mcaRNA14505_R3	0	0	XP_015760440.1	81.1	0	3078.1	>XP_015760440.1 PREDICTED: uncharacterized protein LOC107339638 [Acropora digitifera]	0	0	0
adi2mcaRNA14505_R5	adi2mcaRNA14505_R5	0	0	XP_015760440.1	83.9	0	3045	>XP_015760440.1 PREDICTED: uncharacterized protein LOC107339638 [Acropora digitifera]	0	0	0
adi2mcaRNA14505_R7	adi2mcaRNA14505_R7	0	0	XP_015760440.1	75.8	0	2743.4	>XP_015760440.1 PREDICTED: uncharacterized protein LOC107339638 [Acropora digitifera]	0	0	0
adi2mcaRNA14505_R8	adi2mcaRNA14505_R8	0	0	XP_015760440.1	69.9	0	2474.5	>XP_015760440.1 PREDICTED: uncharacterized protein LOC107339638 [Acropora digitifera]	0	0	0
adi2mcaRNA14527_R0	adi2mcaRNA14527_R0	55377.1	59798.2	XP_022797482.1	82.9	3.8e-73	283.9	>XP_022797482.1 translocon-associated protein subunit delta-like [Stylophora pistillata]	K04571	GO:0005783;GO:0016021	endoplasmic reticulum;integral component of membrane
adi2mcaRNA14540_R6	adi2mcaRNA14540_R6	0	0	XP_015760457.1	91.8	2.4e-133	485	>XP_015760457.1 PREDICTED: calcium-dependent protein kinase 1-like [Acropora digitifera]	0	0	0
adi2mcaRNA14540_R7	adi2mcaRNA14540_R7	0	0	XP_015760457.1	97.7	3.4e-114	421	>XP_015760457.1 PREDICTED: calcium-dependent protein kinase 1-like [Acropora digitifera]	0	GO:0005488;GO:0016301	binding;kinase activity
adi2mcaRNA14542_R1	adi2mcaRNA14542_R1	0	0	XP_015760459.1	79.8	3.7e-40	173.7	>XP_015760459.1 PREDICTED: uncharacterized protein LOC107339672 [Acropora digitifera]	0	0	0
adi2mcaRNA14545_R2	adi2mcaRNA14545_R2	0	0	XP_015760461.1	61.7	6.9e-80	307	>XP_015760461.1 PREDICTED: uncharacterized protein LOC107339673 isoform X2 [Acropora digitifera]	0	0	0
adi2mcaRNA14546_R4	adi2mcaRNA14546_R4	0	0	XP_015760460.1	51.5	5.8e-45	190.7	>XP_015760460.1 PREDICTED: uncharacterized protein LOC107339673 isoform X1 [Acropora digitifera]	0	0	0
adi2mcaRNA14546_R5	adi2mcaRNA14546_R5	0	0	XP_015760460.1	51.5	2.3e-43	185.3	>XP_015760460.1 PREDICTED: uncharacterized protein LOC107339673 isoform X1 [Acropora digitifera]	0	0	0
adi2mcaRNA14548_R3	adi2mcaRNA14548_R3	0	0	XP_015760429.1	51.7	1.7e-75	292.4	>XP_015760429.1 PREDICTED: ATP-dependent DNA helicase RecQ-like [Acropora digitifera]	0	0	0
adi2mcaRNA14548_R4	adi2mcaRNA14548_R4	0	0	XP_015760429.1	71.4	1.5e-68	268.9	>XP_015760429.1 PREDICTED: ATP-dependent DNA helicase RecQ-like [Acropora digitifera]	0	0	0
adi2mcaRNA14550_R9	adi2mcaRNA14550_R9	0	0	XP_015760464.1	84	5.2e-137	496.9	>XP_015760464.1 PREDICTED: trihelix transcription factor ASIL1-like [Acropora digitifera]	0	0	0
adi2mcaRNA14552_R2	adi2mcaRNA14552_R2	0	0	XP_020612550.1	81.7	2.9e-18	100.5	>XP_020612550.1 uncharacterized protein LOC110050880 [Orbicella faveolata]	0	0	0
adi2mcaRNA14552_R6	adi2mcaRNA14552_R6	0	0	XP_015760431.1	50.9	5.5e-14	87	>XP_015760431.1 PREDICTED: uncharacterized protein LOC107339629 [Acropora digitifera]	0	0	0
adi2mcaRNA14553_R3	adi2mcaRNA14553_R3	0	0	XP_015760466.1	75.9	1.1e-95	359.4	>XP_015760466.1 PREDICTED: uncharacterized protein LOC107339677 isoform X1 [Acropora digitifera]	0	0	0
adi2mcaRNA14553_R4	adi2mcaRNA14553_R4	0	0	XP_015760466.1	78.7	1.3e-81	312.4	>XP_015760466.1 PREDICTED: uncharacterized protein LOC107339677 isoform X1 [Acropora digitifera]	0	0	0
adi2mcaRNA14553_R5	adi2mcaRNA14553_R5	0	0	XP_015760466.1	77.3	2.8e-77	297.7	>XP_015760466.1 PREDICTED: uncharacterized protein LOC107339677 isoform X1 [Acropora digitifera]	0	0	0
adi2mcaRNA14553_R6	adi2mcaRNA14553_R6	0	0	XP_015760468.1	62.7	2.7e-56	228	>XP_015760468.1 PREDICTED: uncharacterized protein LOC107339677 isoform X2 [Acropora digitifera]	0	0	0
adi2mcaRNA14553_R8	adi2mcaRNA14553_R8	0	0	XP_015760468.1	46.4	6.7e-32	146.7	>XP_015760468.1 PREDICTED: uncharacterized protein LOC107339677 isoform X2 [Acropora digitifera]	0	0	0
adi2mcaRNA14554_R0	adi2mcaRNA14554_R0	0	0	XP_015760466.1	98.8	3e-199	703.7	>XP_015760466.1 PREDICTED: uncharacterized protein LOC107339677 isoform X1 [Acropora digitifera]	0	0	0
adi2mcaRNA14554_R1	adi2mcaRNA14554_R1	0	0	XP_015760466.1	98.8	3e-199	703.7	>XP_015760466.1 PREDICTED: uncharacterized protein LOC107339677 isoform X1 [Acropora digitifera]	0	0	0
adi2mcaRNA14554_R2	adi2mcaRNA14554_R2	0	0	XP_015760466.1	89	4e-174	620.2	>XP_015760466.1 PREDICTED: uncharacterized protein LOC107339677 isoform X1 [Acropora digitifera]	0	0	0
adi2mcaRNA14554_R4	adi2mcaRNA14554_R4	0	0	XP_020901231.1	53.3	4.5e-94	354.4	>XP_020901231.1 uncharacterized protein LOC110239820 [Exaiptasia pallida]	0	0	0
adi2mcaRNA14554_R6	adi2mcaRNA14554_R6	0	0	XP_020901231.1	58.1	1.8e-100	375.6	>XP_020901231.1 uncharacterized protein LOC110239820 [Exaiptasia pallida]	0	0	0
adi2mcaRNA14554_R8	adi2mcaRNA14554_R8	6.02616	0	XP_015768055.1	55.1	8.2e-99	370.2	>XP_015768055.1 PREDICTED: uncharacterized protein LOC107346750 [Acropora digitifera]	0	0	0
adi2mcaRNA14554_R9	adi2mcaRNA14554_R9	0	0	XP_015768055.1	47.5	1.2e-92	349.7	>XP_015768055.1 PREDICTED: uncharacterized protein LOC107346750 [Acropora digitifera]	0	0	0
adi2mcaRNA14555_R7	adi2mcaRNA14555_R7	0	0	XP_015764289.1	48.7	4e-90	341.3	>XP_015764289.1 PREDICTED: uncharacterized protein LOC107343240 [Acropora digitifera]	0	GO:0003964;GO:0005488;GO:0006278;GO:0016491	RNA-directed DNA polymerase activity;binding;RNA-dependent DNA biosynthetic process;oxidoreductase activity
adi2mcaRNA14556_R0	adi2mcaRNA14556_R0	0	0	PFX34155.1	82	7.9e-44	187.2	>PFX34155.1 hypothetical protein AWC38_SpisGene932 [Stylophora pistillata]	0	0	0
adi2mcaRNA14556_R6	adi2mcaRNA14556_R6	0	0	XP_003390248.1	50.9	5.1e-26	127.5	>XP_003390248.1 PREDICTED: uncharacterized protein LOC100632937 [Amphimedon queenslandica]	0	0	0
adi2mcaRNA14558_R0	adi2mcaRNA14558_R0	0	0	XP_015760469.1	83	0	1216.4	>XP_015760469.1 PREDICTED: uncharacterized protein LOC107339678 [Acropora digitifera]	0	0	0
adi2mcaRNA14558_R2	adi2mcaRNA14558_R2	0	0	XP_015760469.1	78.1	0	1197.2	>XP_015760469.1 PREDICTED: uncharacterized protein LOC107339678 [Acropora digitifera]	0	0	0
adi2mcaRNA14567_R1	adi2mcaRNA14567_R1	0	1.14448	XP_015760471.1	77.1	2.2e-132	482.3	>XP_015760471.1 PREDICTED: cholesterol 24-hydroxylase-like [Acropora digitifera]	0	GO:0006807;GO:0016772;GO:0044238;GO:0044260	nitrogen compound metabolic process;transferase activity, transferring phosphorus-containing groups;primary metabolic process;cellular macromolecule metabolic process
adi2mcaRNA14567_R4	adi2mcaRNA14567_R4	0	0	XP_015760471.1	83.1	4.9e-120	441.4	>XP_015760471.1 PREDICTED: cholesterol 24-hydroxylase-like [Acropora digitifera]	0	GO:0003964;GO:0005488;GO:0006278;GO:0016301;GO:0016310	RNA-directed DNA polymerase activity;binding;RNA-dependent DNA biosynthetic process;kinase activity;phosphorylation
adi2mcaRNA14567_R5	adi2mcaRNA14567_R5	0	0	XP_015760471.1	53.5	3.2e-119	438.7	>XP_015760471.1 PREDICTED: cholesterol 24-hydroxylase-like [Acropora digitifera]	0	GO:0006807;GO:0016772;GO:0044238;GO:0044260	nitrogen compound metabolic process;transferase activity, transferring phosphorus-containing groups;primary metabolic process;cellular macromolecule metabolic process
adi2mcaRNA14567_R8	adi2mcaRNA14567_R8	0	0	XP_015760471.1	75.2	3.3e-130	474.9	>XP_015760471.1 PREDICTED: cholesterol 24-hydroxylase-like [Acropora digitifera]	0	GO:0005488;GO:0006807;GO:0016772;GO:0044238;GO:0044260	binding;nitrogen compound metabolic process;transferase activity, transferring phosphorus-containing groups;primary metabolic process;cellular macromolecule metabolic process
adi2mcaRNA14575_R2	adi2mcaRNA14575_R2	0	0	XP_015760473.1	67.7	4.8e-56	226.9	>XP_015760473.1 PREDICTED: uncharacterized protein LOC107339683 [Acropora digitifera]	0	0	0
adi2mcaRNA14579_R0	adi2mcaRNA14579_R0	0	0	XP_015760476.1	71.4	1.6e-307	1064.7	>XP_015760476.1 PREDICTED: uncharacterized protein LOC107339685 [Acropora digitifera]	0	GO:0006139	nucleobase-containing compound metabolic process
adi2mcaRNA14579_R3	adi2mcaRNA14579_R3	0	0	XP_015760476.1	62	4.3e-274	953.7	>XP_015760476.1 PREDICTED: uncharacterized protein LOC107339685 [Acropora digitifera]	0	0	0
adi2mcaRNA14579_R4	adi2mcaRNA14579_R4	0	0	XP_015760476.1	63.3	1.4e-274	955.7	>XP_015760476.1 PREDICTED: uncharacterized protein LOC107339685 [Acropora digitifera]	0	0	0
adi2mcaRNA14579_R5	adi2mcaRNA14579_R5	0	0	XP_015760476.1	68.3	2.1e-245	858.2	>XP_015760476.1 PREDICTED: uncharacterized protein LOC107339685 [Acropora digitifera]	0	GO:0005488	binding
adi2mcaRNA1458_R3	adi2mcaRNA1458_R3	2.13056	0	XP_015758992.1	82.8	0	1128.6	>XP_015758992.1 PREDICTED: RNA-directed DNA polymerase from mobile element jockey-like [Acropora digitifera]	0	0	0
adi2mcaRNA14583_R1	adi2mcaRNA14583_R1	0	0	XP_015760477.1	55.1	2e-182	648.3	>XP_015760477.1 PREDICTED: uncharacterized protein LOC107339686 [Acropora digitifera]	0	GO:0004672;GO:0004842;GO:0005524;GO:0006468;GO:0016567	protein kinase activity;ubiquitin-protein transferase activity;ATP binding;protein phosphorylation;protein ubiquitination
adi2mcaRNA14583_R5	adi2mcaRNA14583_R5	0	0	PFX25073.1	80.4	7.2e-147	530.4	>PFX25073.1 ATP-dependent DNA helicase PIF1 [Stylophora pistillata]	0	GO:0004386;GO:0004842;GO:0016301;GO:0016310;GO:0016567	helicase activity;ubiquitin-protein transferase activity;kinase activity;phosphorylation;protein ubiquitination
adi2mcaRNA14583_R7	adi2mcaRNA14583_R7	0	0	XP_015760477.1	47.2	6.7e-106	394.4	>XP_015760477.1 PREDICTED: uncharacterized protein LOC107339686 [Acropora digitifera]	0	GO:0006464;GO:0016301;GO:0016310;GO:0140096	cellular protein modification process;kinase activity;phosphorylation;catalytic activity, acting on a protein
adi2mcaRNA14583_R8	adi2mcaRNA14583_R8	0	0	XP_015760477.1	45.3	7.4e-104	387.5	>XP_015760477.1 PREDICTED: uncharacterized protein LOC107339686 [Acropora digitifera]	0	GO:0016740;GO:0044237	transferase activity;cellular metabolic process
adi2mcaRNA14584_R0	adi2mcaRNA14584_R0	0	2.1949	XP_015760493.1	66.7	5.5e-64	253.4	>XP_015760493.1 PREDICTED: uncharacterized protein LOC107339704 [Acropora digitifera]	0	0	0
adi2mcaRNA14585_R0	adi2mcaRNA14585_R0	0	0	XP_015778893.1	76.2	1.8e-91	345.5	>XP_015778893.1 PREDICTED: uncharacterized protein LOC107356780 [Acropora digitifera]	0	0	0
adi2mcaRNA14585_R1	adi2mcaRNA14585_R1	0	0	XP_015778893.1	75.3	1.2e-90	342.8	>XP_015778893.1 PREDICTED: uncharacterized protein LOC107356780 [Acropora digitifera]	0	0	0
adi2mcaRNA14585_R2	adi2mcaRNA14585_R2	0	0	XP_015778893.1	74.9	1.5e-90	342.4	>XP_015778893.1 PREDICTED: uncharacterized protein LOC107356780 [Acropora digitifera]	0	0	0
adi2mcaRNA14585_R6	adi2mcaRNA14585_R6	0	0	XP_015778893.1	69.5	3e-80	308.1	>XP_015778893.1 PREDICTED: uncharacterized protein LOC107356780 [Acropora digitifera]	0	0	0
adi2mcaRNA14585_R8	adi2mcaRNA14585_R8	0	0	XP_015778893.1	72.4	2e-84	322	>XP_015778893.1 PREDICTED: uncharacterized protein LOC107356780 [Acropora digitifera]	0	0	0
adi2mcaRNA14585_R9	adi2mcaRNA14585_R9	0	0	XP_015778893.1	73.2	1.4e-71	279.3	>XP_015778893.1 PREDICTED: uncharacterized protein LOC107356780 [Acropora digitifera]	0	0	0
adi2mcaRNA14600_R0	adi2mcaRNA14600_R0	0	2.33756	XP_015760512.1	82.1	6.9e-116	426.4	>XP_015760512.1 PREDICTED: uncharacterized protein LOC107339729 [Acropora digitifera]	0	0	0
adi2mcaRNA14600_R1	adi2mcaRNA14600_R1	0	0	XP_015760512.1	52.4	2.9e-58	235	>XP_015760512.1 PREDICTED: uncharacterized protein LOC107339729 [Acropora digitifera]	0	0	0
adi2mcaRNA14600_R2	adi2mcaRNA14600_R2	0	0	XP_015760512.1	52.8	6.1e-59	237.3	>XP_015760512.1 PREDICTED: uncharacterized protein LOC107339729 [Acropora digitifera]	0	0	0
adi2mcaRNA14602_R1	adi2mcaRNA14602_R1	0	0	XP_015760514.1	59.1	1.3e-43	186	>XP_015760514.1 PREDICTED: uncharacterized protein LOC107339730 [Acropora digitifera]	0	0	0
adi2mcaRNA14602_R5	adi2mcaRNA14602_R5	0	0	XP_015760514.1	41.3	7.5e-16	93.6	>XP_015760514.1 PREDICTED: uncharacterized protein LOC107339730 [Acropora digitifera]	0	0	0
adi2mcaRNA14604_R2	adi2mcaRNA14604_R2	0	0	XP_015760516.1	58.1	1.6e-37	165.2	>XP_015760516.1 PREDICTED: uncharacterized protein LOC107339731 [Acropora digitifera]	0	0	0
adi2mcaRNA14608_R5	adi2mcaRNA14608_R5	0	0	XP_015755245.1	35.9	4.5e-20	109	>XP_015755245.1 PREDICTED: uncharacterized protein LOC107334789 [Acropora digitifera]	0	GO:0097159;GO:1901363	organic cyclic compound binding;heterocyclic compound binding
adi2mcaRNA14610_R4	adi2mcaRNA14610_R4	0	0	XP_022792808.1	90.5	3.1e-103	384.4	>XP_022792808.1 uncharacterized protein LOC111331871, partial [Stylophora pistillata]	0	GO:0003677;GO:0005634;GO:0008270	DNA binding;nucleus;zinc ion binding
adi2mcaRNA14611_R5	adi2mcaRNA14611_R5	0	0	XP_015752747.1	86.1	5.5e-135	490	>XP_015752747.1 PREDICTED: uncharacterized protein LOC107332521 [Acropora digitifera]	0	GO:0003677	DNA binding
adi2mcaRNA14618_R3	adi2mcaRNA14618_R3	2.7432	4.35711	XP_020609775.1	64.1	1.4e-113	419.9	>XP_020609775.1 uncharacterized protein LOC110048329 [Orbicella faveolata]	0	0	0
adi2mcaRNA14618_R4	adi2mcaRNA14618_R4	0	0	XP_020609775.1	59	1.6e-174	622.5	>XP_020609775.1 uncharacterized protein LOC110048329 [Orbicella faveolata]	0	0	0
adi2mcaRNA14618_R6	adi2mcaRNA14618_R6	0	0.798718	XP_020609775.1	61.8	5.8e-79	304.3	>XP_020609775.1 uncharacterized protein LOC110048329 [Orbicella faveolata]	0	0	0
adi2mcaRNA14618_R7	adi2mcaRNA14618_R7	0	0	XP_015760501.1	49.8	6.4e-62	247.3	>XP_015760501.1 PREDICTED: uncharacterized protein LOC107339717 [Acropora digitifera]	0	0	0
adi2mcaRNA14618_R8	adi2mcaRNA14618_R8	0	0	XP_020609775.1	55.2	1.9e-116	429.1	>XP_020609775.1 uncharacterized protein LOC110048329 [Orbicella faveolata]	0	0	0
adi2mcaRNA14621_R1	adi2mcaRNA14621_R1	0	0	XP_015760503.1	98	1.9e-305	1057.7	>XP_015760503.1 PREDICTED: uncharacterized protein LOC107339720 [Acropora digitifera]	0	0	0
adi2mcaRNA14621_R2	adi2mcaRNA14621_R2	0	0	XP_015760503.1	98	1.9e-305	1057.7	>XP_015760503.1 PREDICTED: uncharacterized protein LOC107339720 [Acropora digitifera]	0	0	0
adi2mcaRNA14640_R0	adi2mcaRNA14640_R0	23.9034	30.9277	XP_015760536.1	70.8	0	1568.9	>XP_015760536.1 PREDICTED: forkhead-associated domain-containing protein 1-like isoform X5 [Acropora digitifera]	0	0	0
adi2mcaRNA14645_R4	adi2mcaRNA14645_R4	0	0	XP_015772106.1	57.7	2.7e-22	114.8	>XP_015772106.1 PREDICTED: uncharacterized protein LOC107350396 isoform X1 [Acropora digitifera]	0	0	0
adi2mcaRNA14645_R5	adi2mcaRNA14645_R5	0	5.89775	XP_015772108.1	70.1	4.9e-25	123.6	>XP_015772108.1 PREDICTED: uncharacterized protein LOC107350396 isoform X2 [Acropora digitifera]	0	0	0
adi2mcaRNA14647_R2	adi2mcaRNA14647_R2	0	0	XP_015760505.1	74.5	1.1e-87	332.8	>XP_015760505.1 PREDICTED: uncharacterized protein LOC107339722 [Acropora digitifera]	0	0	0
adi2mcaRNA14647_R7	adi2mcaRNA14647_R7	0	0	XP_015760505.1	71.9	3.3e-85	325.1	>XP_015760505.1 PREDICTED: uncharacterized protein LOC107339722 [Acropora digitifera]	0	0	0
adi2mcaRNA14649_R2	adi2mcaRNA14649_R2	0	0	XP_022330297.1	44.5	6.4e-239	837	>XP_022330297.1 uncharacterized protein K02A2.6-like [Crassostrea virginica]	0	0	0
adi2mcaRNA14649_R5	adi2mcaRNA14649_R5	0	0	XP_015760506.1	50.6	2e-94	355.5	>XP_015760506.1 PREDICTED: uncharacterized protein LOC107339724 [Acropora digitifera]	0	0	0
adi2mcaRNA14652_R7	adi2mcaRNA14652_R7	0	0	XP_015747709.1	56.5	1.4e-95	359	>XP_015747709.1 PREDICTED: uncharacterized protein LOC107327486 [Acropora digitifera]	0	0	0
adi2mcaRNA14655_R2	adi2mcaRNA14655_R2	0	0	XP_015760568.1	61.3	1.8e-76	295.4	>XP_015760568.1 PREDICTED: uncharacterized protein LOC107339770 [Acropora digitifera]	0	0	0
adi2mcaRNA14662_R8	adi2mcaRNA14662_R8	0	0	XP_015747709.1	52.7	1.2e-83	319.3	>XP_015747709.1 PREDICTED: uncharacterized protein LOC107327486 [Acropora digitifera]	0	0	0
adi2mcaRNA14666_R4	adi2mcaRNA14666_R4	0	0	XP_015757290.1	51.3	1.4e-81	312.4	>XP_015757290.1 PREDICTED: uncharacterized protein LOC107336741 [Acropora digitifera]	0	0	0
adi2mcaRNA14666_R7	adi2mcaRNA14666_R7	0	0	XP_015757290.1	51	1.3e-82	315.8	>XP_015757290.1 PREDICTED: uncharacterized protein LOC107336741 [Acropora digitifera]	0	0	0
adi2mcaRNA14667_R4	adi2mcaRNA14667_R4	0	2.30201	XP_015747709.1	54.2	5.2e-87	330.5	>XP_015747709.1 PREDICTED: uncharacterized protein LOC107327486 [Acropora digitifera]	0	0	0
adi2mcaRNA14668_R1	adi2mcaRNA14668_R1	0	0	XP_015760545.1	86.9	1.2e-71	278.9	>XP_015760545.1 PREDICTED: uncharacterized protein LOC107339749 [Acropora digitifera]	0	GO:0004386;GO:0005488;GO:0006259;GO:0032392;GO:0043229	helicase activity;binding;DNA metabolic process;DNA geometric change;intracellular organelle
adi2mcaRNA14668_R4	adi2mcaRNA14668_R4	0	0	XP_015760545.1	92.2	1.7e-50	208.8	>XP_015760545.1 PREDICTED: uncharacterized protein LOC107339749 [Acropora digitifera]	0	0	0
adi2mcaRNA14668_R8	adi2mcaRNA14668_R8	0	0	XP_015760545.1	91.5	8.8e-51	209.5	>XP_015760545.1 PREDICTED: uncharacterized protein LOC107339749 [Acropora digitifera]	0	GO:0004386;GO:0006259;GO:0032392;GO:0043229	helicase activity;DNA metabolic process;DNA geometric change;intracellular organelle
adi2mcaRNA14668_R9	adi2mcaRNA14668_R9	0	0	XP_015760545.1	92	3.3e-47	198	>XP_015760545.1 PREDICTED: uncharacterized protein LOC107339749 [Acropora digitifera]	0	0	0
adi2mcaRNA14686_R0	adi2mcaRNA14686_R0	3.27317	2.04284	XP_015760584.1	65.6	2.6e-16	95.5	>XP_015760584.1 PREDICTED: fibrillin-2-like [Acropora digitifera]	0	0	0
adi2mcaRNA14688_R0	adi2mcaRNA14688_R0	80.744	75.8354	PFX29937.1	69.4	2.3e-111	411.4	>PFX29937.1 Mitogen-activated protein kinase 14 [Stylophora pistillata]	0	GO:0000166;GO:0004672;GO:0006139;GO:0006468;GO:0050789	nucleotide binding;protein kinase activity;nucleobase-containing compound metabolic process;protein phosphorylation;regulation of biological process
adi2mcaRNA1469_R0	adi2mcaRNA1469_R0	59.2822	72.5818	XP_015760515.1	77.6	2.8e-248	867.5	>XP_015760515.1 PREDICTED: probable ATP-dependent RNA helicase DDX52 isoform X2 [Acropora digitifera]	K14779	GO:0003723;GO:0003724;GO:0005524;GO:0030490	RNA binding;RNA helicase activity;ATP binding;maturation of SSU-rRNA
adi2mcaRNA14690_R3	adi2mcaRNA14690_R3	0	0	XP_015760586.1	57.3	3.6e-38	167.9	>XP_015760586.1 PREDICTED: uncharacterized protein LOC107339785 isoform X2 [Acropora digitifera]	0	0	0
adi2mcaRNA14707_R2	adi2mcaRNA14707_R2	0	0	XP_015760599.1	92.5	2.4e-106	394.4	>XP_015760599.1 PREDICTED: uncharacterized protein LOC107339800 [Acropora digitifera]	0	0	0
adi2mcaRNA14707_R3	adi2mcaRNA14707_R3	0	0	XP_015760599.1	93	2.8e-107	397.5	>XP_015760599.1 PREDICTED: uncharacterized protein LOC107339800 [Acropora digitifera]	0	0	0
adi2mcaRNA14707_R8	adi2mcaRNA14707_R8	0	0	XP_015760599.1	74.1	7.3e-79	303.1	>XP_015760599.1 PREDICTED: uncharacterized protein LOC107339800 [Acropora digitifera]	0	0	0
adi2mcaRNA14707_R9	adi2mcaRNA14707_R9	0	0	XP_015760599.1	73.5	6.2e-78	300.1	>XP_015760599.1 PREDICTED: uncharacterized protein LOC107339800 [Acropora digitifera]	0	0	0
adi2mcaRNA14715_R1	adi2mcaRNA14715_R1	0	0	XP_015760600.1	68.5	1.7e-74	288.5	>XP_015760600.1 PREDICTED: uncharacterized protein LOC107339801 [Acropora digitifera]	0	0	0
adi2mcaRNA14715_R2	adi2mcaRNA14715_R2	0	0	XP_015760600.1	67.7	3.3e-73	284.3	>XP_015760600.1 PREDICTED: uncharacterized protein LOC107339801 [Acropora digitifera]	0	0	0
adi2mcaRNA14717_R0	adi2mcaRNA14717_R0	255.584	97.6831	XP_015760607.1	91.6	6.1e-58	233.8	>XP_015760607.1 PREDICTED: leucine-rich repeat-containing protein 57-like [Acropora digitifera]	0	0	0
adi2mcaRNA14719_R0	adi2mcaRNA14719_R0	21.2135	21.988	XP_015760594.1	73.6	0	3544.2	>XP_015760594.1 PREDICTED: prolow-density lipoprotein receptor-related protein 1-like [Acropora digitifera]	0	0	0
adi2mcaRNA1472_R0	adi2mcaRNA1472_R0	1076.91	1338.78	XP_015759001.1	73.9	0	1100.1	>XP_015759001.1 PREDICTED: tRNA (cytosine(34)-C(5))-methyltransferase-like [Acropora digitifera]	K15335	GO:0001510;GO:0003723;GO:0005634;GO:0005737;GO:0008173;GO:0008757;GO:0050789	RNA methylation;RNA binding;nucleus;cytoplasm;RNA methyltransferase activity;S-adenosylmethionine-dependent methyltransferase activity;regulation of biological process
adi2mcaRNA14721_R0	adi2mcaRNA14721_R0	6.14341	18.0948	XP_015760595.1	52.7	2.9e-310	1073.9	>XP_015760595.1 PREDICTED: cilia- and flagella-associated protein 61-like [Acropora digitifera]	0	0	0
adi2mcaRNA14743_R5	adi2mcaRNA14743_R5	0	0	XP_015760635.1	43.5	2.9e-34	155.2	>XP_015760635.1 PREDICTED: uncharacterized protein LOC107339815 [Acropora digitifera]	0	0	0
adi2mcaRNA14762_R5	adi2mcaRNA14762_R5	0	0	XP_020629006.1	83.1	5.1e-86	327	>XP_020629006.1 uncharacterized protein LOC110066146 isoform X1 [Orbicella faveolata]	0	0	0
adi2mcaRNA1478_R5	adi2mcaRNA1478_R5	0	0	XP_015761048.1	62.4	1e-214	755.7	>XP_015761048.1 PREDICTED: uncharacterized protein LOC107340202 [Acropora digitifera]	0	0	0
adi2mcaRNA14782_R0	adi2mcaRNA14782_R0	0	0	XP_022780741.1	79.5	2.2e-45	193.4	>XP_022780741.1 uncharacterized protein LOC111321982 isoform X1 [Stylophora pistillata]	0	0	0
adi2mcaRNA14787_R0	adi2mcaRNA14787_R0	0	0	XP_015760651.1	64.4	1.2e-43	185.7	>XP_015760651.1 PREDICTED: uncharacterized protein LOC107339830 [Acropora digitifera]	0	0	0
adi2mcaRNA14789_R0	adi2mcaRNA14789_R0	0	0	PFX31525.1	54.7	7.7e-12	80.5	>PFX31525.1 Synaptonemal complex protein 1 [Stylophora pistillata]	0	GO:0016020	membrane
adi2mcaRNA14791_R0	adi2mcaRNA14791_R0	6.36941	8.90196	XP_015760684.1	82.3	0	1245.3	>XP_015760684.1 PREDICTED: glutamate carboxypeptidase 2-like [Acropora digitifera]	K01301	0	0
adi2mcaRNA14792_R0	adi2mcaRNA14792_R0	47.4495	36.5027	XP_015760686.1	89.7	4.9e-185	656.8	>XP_015760686.1 PREDICTED: cryptochrome-1-like [Acropora digitifera]	K02295	GO:0005622;GO:0009628;GO:0050789	intracellular;response to abiotic stimulus;regulation of biological process
adi2mcaRNA14792_R1	adi2mcaRNA14792_R1	51.6196	107.964	XP_015760686.1	89.9	1.9e-184	654.8	>XP_015760686.1 PREDICTED: cryptochrome-1-like [Acropora digitifera]	K02295	GO:0005622;GO:0009628;GO:0050789	intracellular;response to abiotic stimulus;regulation of biological process
adi2mcaRNA14811_R0	adi2mcaRNA14811_R0	536.227	788.585	XP_015760699.1	73.4	5.7e-168	600.1	>XP_015760699.1 PREDICTED: synaptotagmin-6-like isoform X2 [Acropora digitifera]	0	GO:0001786;GO:0005509;GO:0005544;GO:0005886;GO:0014059;GO:0017158;GO:0019905;GO:0030276;GO:0048791;GO:0070382;GO:0071277	phosphatidylserine binding;calcium ion binding;calcium-dependent phospholipid binding;plasma membrane;regulation of dopamine secretion;regulation of calcium ion-dependent exocytosis;syntaxin binding;clathrin binding;calcium ion-regulated exocytosis of neurotransmitter;exocytic vesicle;cellular response to calcium ion
adi2mcaRNA14833_R0	adi2mcaRNA14833_R0	184.959	455.105	XP_015760711.1	65.9	5.1e-57	230.3	>XP_015760711.1 PREDICTED: insulin receptor substrate 1-like [Acropora digitifera]	0	0	0
adi2mcaRNA14845_R1	adi2mcaRNA14845_R1	0	0	XP_015760722.1	65.1	2.4e-164	588.2	>XP_015760722.1 PREDICTED: uncharacterized protein LOC107339895 isoform X1 [Acropora digitifera]	0	0	0
adi2mcaRNA14851_R1	adi2mcaRNA14851_R1	0	0	XP_020614616.1	76.2	1.6e-71	278.9	>XP_020614616.1 uncharacterized protein LOC110052786 isoform X1 [Orbicella faveolata]	0	0	0
adi2mcaRNA14852_R0	adi2mcaRNA14852_R0	31.8724	92.2396	XP_015760669.1	70.7	7.2e-54	219.9	>XP_015760669.1 PREDICTED: lysosomal acid phosphatase-like [Acropora digitifera]	0	0	0
adi2mcaRNA14862_R2	adi2mcaRNA14862_R2	0	0	XP_015760735.1	70.4	2.5e-42	181	>XP_015760735.1 PREDICTED: uncharacterized protein LOC107339901 isoform X3 [Acropora digitifera]	0	0	0
adi2mcaRNA14862_R7	adi2mcaRNA14862_R7	0	0	XP_015760734.1	67.8	6.5e-12	79.3	>XP_015760734.1 PREDICTED: uncharacterized protein LOC107339901 isoform X2 [Acropora digitifera]	0	0	0
adi2mcaRNA14862_R8	adi2mcaRNA14862_R8	0	0	XP_015760734.1	66.1	1.1e-11	78.6	>XP_015760734.1 PREDICTED: uncharacterized protein LOC107339901 isoform X2 [Acropora digitifera]	0	0	0
adi2mcaRNA14863_R9	adi2mcaRNA14863_R9	0	0	XP_015760734.1	67.8	7.2e-12	79	>XP_015760734.1 PREDICTED: uncharacterized protein LOC107339901 isoform X2 [Acropora digitifera]	0	0	0
adi2mcaRNA14881_R0	adi2mcaRNA14881_R0	319.442	449.577	XP_015760745.1	82.6	0	1500.3	>XP_015760745.1 PREDICTED: WD repeat-containing protein on Y chromosome-like [Acropora digitifera]	0	0	0
adi2mcaRNA14882_R3	adi2mcaRNA14882_R3	90.8522	66.342	XP_020625043.1	75.3	3.5e-95	357.5	>XP_020625043.1 uncharacterized protein LOC110062459 [Orbicella faveolata]	0	GO:0005829	cytosol
adi2mcaRNA14894_R0	adi2mcaRNA14894_R0	10.4048	6.87506	XP_015760750.1	82	4.1e-144	520.4	>XP_015760750.1 PREDICTED: mitochondrial ornithine transporter 1-like [Acropora digitifera]	K15101	GO:0000064;GO:0016020;GO:1990575	L-ornithine transmembrane transporter activity;membrane;mitochondrial L-ornithine transmembrane transport
adi2mcaRNA14910_R0	adi2mcaRNA14910_R0	107.958	126.985	XP_015760756.1	53.3	2.9e-119	438	>XP_015760756.1 PREDICTED: probable dolichyl pyrophosphate Glc1Man9GlcNAc2 alpha-1,3-glucosyltransferase [Acropora digitifera]	K03849	GO:0006486;GO:0012505;GO:0016020;GO:0043227;GO:0046527	protein glycosylation;endomembrane system;membrane;membrane-bounded organelle;glucosyltransferase activity
adi2mcaRNA14912_R0	adi2mcaRNA14912_R0	538.143	461.27	XP_015760783.1	52.7	2.9e-139	505	>XP_015760783.1 PREDICTED: RING finger protein 219-like [Acropora digitifera]	0	GO:0004842;GO:0006275;GO:0006513	ubiquitin-protein transferase activity;regulation of DNA replication;protein monoubiquitination
adi2mcaRNA14919_R0	adi2mcaRNA14919_R0	0	0	XP_015760793.1	66.1	4.9e-111	410.6	>XP_015760793.1 PREDICTED: zinc metalloproteinase nas-15-like [Acropora digitifera]	0	GO:0004222;GO:0046872	metalloendopeptidase activity;metal ion binding
adi2mcaRNA14923_R0	adi2mcaRNA14923_R0	0	0	XP_015760799.1	74	0	1463.7	>XP_015760799.1 PREDICTED: plasma membrane calcium-transporting ATPase 4-like isoform X2 [Acropora digitifera]	0	GO:0005388;GO:0005524;GO:0016021;GO:0070588	calcium transmembrane transporter activity, phosphorylative mechanism;ATP binding;integral component of membrane;calcium ion transmembrane transport
adi2mcaRNA14923_R1	adi2mcaRNA14923_R1	0	0	XP_015760799.1	71.7	0	1397.9	>XP_015760799.1 PREDICTED: plasma membrane calcium-transporting ATPase 4-like isoform X2 [Acropora digitifera]	0	GO:0000166;GO:0006816;GO:0016020;GO:0019829	nucleotide binding;calcium ion transport;membrane;ATPase-coupled cation transmembrane transporter activity
adi2mcaRNA14928_R1	adi2mcaRNA14928_R1	2.38772	0	XP_022785722.1	76.3	1.6e-138	501.9	>XP_022785722.1 plasma membrane calcium-transporting ATPase 2-like [Stylophora pistillata]	0	GO:0005388;GO:0005524;GO:0005623;GO:0016021;GO:0043231;GO:0051480;GO:0070588	calcium transmembrane transporter activity, phosphorylative mechanism;ATP binding;cell;integral component of membrane;intracellular membrane-bounded organelle;regulation of cytosolic calcium ion concentration;calcium ion transmembrane transport
adi2mcaRNA1494_R0	adi2mcaRNA1494_R0	21.8737	29.0796	XP_015761127.1	56.5	0	1629.8	>XP_015761127.1 PREDICTED: uncharacterized protein LOC107340287 [Acropora digitifera]	0	0	0
adi2mcaRNA14943_R0	adi2mcaRNA14943_R0	171.658	80.5883	XP_015760817.1	63.2	0	1327	>XP_015760817.1 PREDICTED: ankyrin repeat and fibronectin type-III domain-containing protein 1-like isoform X2 [Acropora digitifera]	0	0	0
adi2mcaRNA14950_R0	adi2mcaRNA14950_R0	42.3768	21.3326	XP_020625576.1	84.3	8.5e-86	326.2	>XP_020625576.1 uncharacterized protein C7orf62-like [Orbicella faveolata]	0	GO:0009785;GO:0009882;GO:0071949	blue light signaling pathway;blue light photoreceptor activity;FAD binding
adi2mcaRNA14954_R0	adi2mcaRNA14954_R0	370.788	363.149	XP_022790208.1	71.5	2.4e-263	917.5	>XP_022790208.1 cilia- and flagella-associated protein 52-like [Stylophora pistillata]	0	0	0
adi2mcaRNA14956_R0	adi2mcaRNA14956_R0	0	0	XP_015760810.1	81.1	3.4e-133	484.2	>XP_015760810.1 PREDICTED: melanocyte-stimulating hormone receptor-like [Acropora digitifera]	0	0	0
adi2mcaRNA14963_R0	adi2mcaRNA14963_R0	0	0	XP_015760811.1	91.8	9.6e-105	389	>XP_015760811.1 PREDICTED: uncharacterized protein LOC107339967 [Acropora digitifera]	0	0	0
adi2mcaRNA14966_R7	adi2mcaRNA14966_R7	0	0	XP_015760831.1	100	0	1481.5	>XP_015760831.1 PREDICTED: zinc finger protein 862-like [Acropora digitifera]	0	0	0
adi2mcaRNA14969_R1	adi2mcaRNA14969_R1	0	0	#N/A	#N/A	#N/A	#N/A	#N/A	0	0	0
adi2mcaRNA14971_R6	adi2mcaRNA14971_R6	0	0	XP_015760834.1	73.2	5.7e-97	363.6	>XP_015760834.1 PREDICTED: uncharacterized protein LOC107339993 [Acropora digitifera]	0	0	0
adi2mcaRNA14977_R2	adi2mcaRNA14977_R2	0	0	XP_015760809.1	59.2	8.8e-159	569.7	>XP_015760809.1 PREDICTED: uncharacterized protein LOC107339965 [Acropora digitifera]	0	0	0
adi2mcaRNA14978_R3	adi2mcaRNA14978_R3	0	0	XP_022790960.1	57.4	1.5e-15	92.8	>XP_022790960.1 uncharacterized protein LOC111330383 [Stylophora pistillata]	0	GO:0003964;GO:0006278	RNA-directed DNA polymerase activity;RNA-dependent DNA biosynthetic process
adi2mcaRNA14978_R5	adi2mcaRNA14978_R5	0	0	XP_015754701.1	51.7	1.5e-31	145.6	>XP_015754701.1 PREDICTED: uncharacterized protein LOC107334283 [Acropora digitifera]	0	0	0
adi2mcaRNA14981_R8	adi2mcaRNA14981_R8	0	0	PFX12866.1	58.1	4.9e-94	354.8	>PFX12866.1 hypothetical protein AWC38_SpisGene23107 [Stylophora pistillata]	0	0	0
adi2mcaRNA14981_R9	adi2mcaRNA14981_R9	0	0	XP_020619118.1	73.9	2e-98	369.4	>XP_020619118.1 uncharacterized protein LOC110056902 [Orbicella faveolata]	0	0	0
adi2mcaRNA14986_R0	adi2mcaRNA14986_R0	35.3218	1.65795	XP_015760842.1	71.3	1.4e-99	372.1	>XP_015760842.1 PREDICTED: uncharacterized protein LOC107340003 [Acropora digitifera]	0	0	0
adi2mcaRNA14993_R0	adi2mcaRNA14993_R0	45.7117	50.3177	XP_015760844.1	68.8	0	4976.8	>XP_015760844.1 PREDICTED: cadherin-23-like [Acropora digitifera]	0	0	0
adi2mcaRNA15002_R0	adi2mcaRNA15002_R0	0	0	XP_015760847.1	85.5	2e-160	574.7	>XP_015760847.1 PREDICTED: uncharacterized protein LOC107340009 [Acropora digitifera]	K22371	0	0
adi2mcaRNA15002_R2	adi2mcaRNA15002_R2	0	0	XP_015760847.1	66.5	3.7e-101	377.5	>XP_015760847.1 PREDICTED: uncharacterized protein LOC107340009 [Acropora digitifera]	0	0	0
adi2mcaRNA15003_R8	adi2mcaRNA15003_R8	0	0	XP_015760848.1	54.7	8.2e-160	573.5	>XP_015760848.1 PREDICTED: uncharacterized protein LOC107340010 [Acropora digitifera]	0	0	0
adi2mcaRNA15011_R0	adi2mcaRNA15011_R0	0	0	XP_022783220.1	45.6	1.8e-89	339.7	>XP_022783220.1 protein sidekick-2-like isoform X2 [Stylophora pistillata]	0	GO:0006807;GO:0016311;GO:0016791;GO:0044238;GO:0044260	nitrogen compound metabolic process;dephosphorylation;phosphatase activity;primary metabolic process;cellular macromolecule metabolic process
adi2mcaRNA15011_R3	adi2mcaRNA15011_R3	0	0.665306	XP_022783214.1	57.7	9.4e-100	373.6	>XP_022783214.1 titin-like isoform X1 [Stylophora pistillata]	0	GO:0006807;GO:0016020;GO:0016311;GO:0016791;GO:0044238;GO:0044260	nitrogen compound metabolic process;membrane;dephosphorylation;phosphatase activity;primary metabolic process;cellular macromolecule metabolic process
adi2mcaRNA15011_R4	adi2mcaRNA15011_R4	1.72272	1.07518	XP_022783220.1	53.1	2e-97	365.9	>XP_022783220.1 protein sidekick-2-like isoform X2 [Stylophora pistillata]	0	GO:0016020	membrane
adi2mcaRNA15011_R5	adi2mcaRNA15011_R5	0	0.603016	PFX30134.1	47.4	2.4e-88	335.9	>PFX30134.1 Protein sidekick-2 [Stylophora pistillata]	0	GO:0006807;GO:0016311;GO:0016791;GO:0044238;GO:0044260	nitrogen compound metabolic process;dephosphorylation;phosphatase activity;primary metabolic process;cellular macromolecule metabolic process
adi2mcaRNA15011_R7	adi2mcaRNA15011_R7	0	9.72704	XP_022783215.1	56.5	5.5e-85	324.3	>XP_022783215.1 titin-like isoform X2 [Stylophora pistillata]	0	GO:0016020;GO:0016311;GO:0016791	membrane;dephosphorylation;phosphatase activity
adi2mcaRNA15011_R8	adi2mcaRNA15011_R8	0	0	XP_022783220.1	48.8	6.3e-93	350.9	>XP_022783220.1 protein sidekick-2-like isoform X2 [Stylophora pistillata]	0	GO:0016787;GO:0044237	hydrolase activity;cellular metabolic process
adi2mcaRNA15011_R9	adi2mcaRNA15011_R9	0	1.31329	XP_022783217.1	54.6	5e-101	377.9	>XP_022783217.1 titin-like isoform X4 [Stylophora pistillata]	0	GO:0016020	membrane
[truncated: 61,957 more rows]

## Sheet: Egg KO-GO
Sequence Name	Annotation GO Count	Annotation GO ID	Annotation GO Term	Annotation GO Category	Total counts-EGG	KEGG	Blast	Annotation Score
[truncated: 25,354 more rows]

[truncated: 4 more sheets: Egg Ordered, Sperm KO-GO, Sperm Ordered, Egg DESeq2 input]
